# Supplementary material for: Cerebrospinal Fluid Proteomics in Friedreich Ataxia Reveals Markers of Neurodegeneration and Neuroinflammation
Source: Front Neurosci. 2022 Jul 13;16:885313. doi: 10.3389/fnins.2022.885313 (PMC9326443; doi:10.3389/fnins.2022.885313)
Supplement: Supplementary file 1 [file Table_1.XLSX]

## Sheet: CSF library
N	Unused	Total	% Cov	Accession #	Name	Species	Peptides(95%)
1	706.44	706.44	96.3	sp|P01024|CO3_HUMAN	Complement C3 OS=Homo sapiens OX=9606 GN=C3 PE=1 SV=2	HUMAN	1222
2	533.72	533.72	95.4	sp|P02768|ALBU_HUMAN	Serum albumin OS=Homo sapiens OX=9606 GN=ALB PE=1 SV=2	HUMAN	1777
3	511.83	511.83	92.6	sp|P0C0L4|CO4A_HUMAN	Complement C4-A OS=Homo sapiens OX=9606 GN=C4A PE=1 SV=2	HUMAN	1012
4	338.93	338.93	91.1	sp|P01019|ANGT_HUMAN	Angiotensinogen OS=Homo sapiens OX=9606 GN=AGT PE=1 SV=1	HUMAN	700
5	329.73	329.73	94.7	sp|P00450|CERU_HUMAN	Ceruloplasmin OS=Homo sapiens OX=9606 GN=CP PE=1 SV=1	HUMAN	526
6	329.19	329.19	86.4	sp|P02766|TTHY_HUMAN	Transthyretin OS=Homo sapiens OX=9606 GN=TTR PE=1 SV=1	HUMAN	1030
7	292.99	292.99	95.7	sp|P02790|HEMO_HUMAN	Hemopexin OS=Homo sapiens OX=9606 GN=HPX PE=1 SV=2	HUMAN	684
8	230.23	230.23	82.2	sp|P02751-3|FINC_HUMAN	Isoform 3 of Fibronectin OS=Homo sapiens OX=9606 GN=FN1	HUMAN	288
9	227.32	227.32	97.9	sp|P41222|PTGDS_HUMAN	Prostaglandin-H2 D-isomerase OS=Homo sapiens OX=9606 GN=PTGDS PE=1 SV=1	HUMAN	748
10	224.23	224.23	92.4	tr|E7EUF1|E7EUF1_HUMAN	Ectonucleotide pyrophosphatase/phosphodiesterase family member 2 OS=Homo sapiens OX=9606 GN=ENPP2 PE=1 SV=1	HUMAN	339
11	206.73	206.73	91.1	sp|P06396|GELS_HUMAN	Gelsolin OS=Homo sapiens OX=9606 GN=GSN PE=1 SV=1	HUMAN	452
12	198.36	198.36	91.7	sp|P01011|AACT_HUMAN	Alpha-1-antichymotrypsin OS=Homo sapiens OX=9606 GN=SERPINA3 PE=1 SV=2	HUMAN	341
13	196.83	196.83	95	sp|P36955|PEDF_HUMAN	Pigment epithelium-derived factor OS=Homo sapiens OX=9606 GN=SERPINF1 PE=1 SV=4	HUMAN	391
14	189.59	189.59	82.8	tr|B4E1Z4|B4E1Z4_HUMAN	cDNA FLJ55673, highly similar to Complement factor B (EC 3.4.21.47) OS=Homo sapiens OX=9606 PE=1 SV=1	HUMAN	276
15	183.18	183.18	96.8	sp|P02774|VTDB_HUMAN	Vitamin D-binding protein OS=Homo sapiens OX=9606 GN=GC PE=1 SV=1	HUMAN	358
16	179.73	179.73	84.6	sp|P01023|A2MG_HUMAN	Alpha-2-macroglobulin OS=Homo sapiens OX=9606 GN=A2M PE=1 SV=3	HUMAN	207
17	178.64	178.64	95	sp|P02649|APOE_HUMAN	Apolipoprotein E OS=Homo sapiens OX=9606 GN=APOE PE=1 SV=1	HUMAN	534
18	174.05	174.05	91.5	sp|P10909|CLUS_HUMAN	Clusterin OS=Homo sapiens OX=9606 GN=CLU PE=1 SV=1	HUMAN	439
19	163.4	163.4	72.8	sp|Q92823-2|NRCAM_HUMAN	Isoform 2 of Neuronal cell adhesion molecule OS=Homo sapiens OX=9606 GN=NRCAM	HUMAN	217
20	149.48	149.48	94.8	sp|P01008|ANT3_HUMAN	Antithrombin-III OS=Homo sapiens OX=9606 GN=SERPINC1 PE=1 SV=1	HUMAN	228
21	134.76	134.76	80.8	sp|P51693|APLP1_HUMAN	Amyloid-like protein 1 OS=Homo sapiens OX=9606 GN=APLP1 PE=1 SV=3	HUMAN	249
22	133.9	133.9	70.7	sp|O00533|NCHL1_HUMAN	Neural cell adhesion molecule L1-like protein OS=Homo sapiens OX=9606 GN=CHL1 PE=1 SV=4	HUMAN	198
23	133.13	133.13	91.6	sp|P05060|SCG1_HUMAN	Secretogranin-1 OS=Homo sapiens OX=9606 GN=CHGB PE=1 SV=2	HUMAN	203
24	132.96	132.96	75.4	sp|P04217|A1BG_HUMAN	Alpha-1B-glycoprotein OS=Homo sapiens OX=9606 GN=A1BG PE=1 SV=4	HUMAN	252
25	132.17	132.17	85.6	sp|Q14624|ITIH4_HUMAN	Inter-alpha-trypsin inhibitor heavy chain H4 OS=Homo sapiens OX=9606 GN=ITIH4 PE=1 SV=4	HUMAN	169
26	130.26	130.26	87.6	sp|P02647|APOA1_HUMAN	Apolipoprotein A-I OS=Homo sapiens OX=9606 GN=APOA1 PE=1 SV=1	HUMAN	309
27	127.16	127.16	77.3	sp|P08603|CFAH_HUMAN	Complement factor H OS=Homo sapiens OX=9606 GN=CFH PE=1 SV=4	HUMAN	178
28	125.1	125.1	91.7	sp|P02787|TRFE_HUMAN	Serotransferrin OS=Homo sapiens OX=9606 GN=TF PE=1 SV=3	HUMAN	172
29	123.57	123.57	69.8	sp|O94985-2|CSTN1_HUMAN	Isoform 2 of Calsyntenin-1 OS=Homo sapiens OX=9606 GN=CLSTN1	HUMAN	165
30	121.91	121.91	92.6	sp|P05155|IC1_HUMAN	Plasma protease C1 inhibitor OS=Homo sapiens OX=9606 GN=SERPING1 PE=1 SV=2	HUMAN	228
31	121.34	121.34	96.1	sp|Q96KN2|CNDP1_HUMAN	Beta-Ala-His dipeptidase OS=Homo sapiens OX=9606 GN=CNDP1 PE=1 SV=4	HUMAN	249
32	120.36	123.2	85.4	sp|P01009|A1AT_HUMAN	Alpha-1-antitrypsin OS=Homo sapiens OX=9606 GN=SERPINA1 PE=1 SV=3	HUMAN	188
33	116.91	116.91	80.8	sp|Q12860|CNTN1_HUMAN	Contactin-1 OS=Homo sapiens OX=9606 GN=CNTN1 PE=1 SV=1	HUMAN	170
34	115.16	115.16	86.3	sp|P01034|CYTC_HUMAN	Cystatin-C OS=Homo sapiens OX=9606 GN=CST3 PE=1 SV=1	HUMAN	385
35	113.61	115.85	71.5	sp|P05067-8|A4_HUMAN	Isoform APP751 of Amyloid-beta A4 protein OS=Homo sapiens OX=9606 GN=APP	HUMAN	147
36	112.2	112.2	83.6	sp|P00747|PLMN_HUMAN	Plasminogen OS=Homo sapiens OX=9606 GN=PLG PE=1 SV=2	HUMAN	114
37	108.24	108.24	90.2	sp|Q14515|SPRL1_HUMAN	SPARC-like protein 1 OS=Homo sapiens OX=9606 GN=SPARCL1 PE=1 SV=2	HUMAN	191
38	106.73	106.73	82.4	tr|B1AHL2|B1AHL2_HUMAN	Fibulin-1 OS=Homo sapiens OX=9606 GN=FBLN1 PE=1 SV=1	HUMAN	169
39	102.7	102.7	86.7	sp|P02765|FETUA_HUMAN	Alpha-2-HS-glycoprotein OS=Homo sapiens OX=9606 GN=AHSG PE=1 SV=1	HUMAN	172
40	102.33	102.33	84.3	sp|O43505|B4GA1_HUMAN	Beta-1,4-glucuronyltransferase 1 OS=Homo sapiens OX=9606 GN=B4GAT1 PE=1 SV=1	HUMAN	164
41	101.53	101.53	95.8	sp|P69905|HBA_HUMAN	Hemoglobin subunit alpha OS=Homo sapiens OX=9606 GN=HBA1 PE=1 SV=2	HUMAN	158
42	95.53	95.53	97.2	sp|P06727|APOA4_HUMAN	Apolipoprotein A-IV OS=Homo sapiens OX=9606 GN=APOA4 PE=1 SV=3	HUMAN	111
43	93.83	93.83	70.5	sp|P19827|ITIH1_HUMAN	Inter-alpha-trypsin inhibitor heavy chain H1 OS=Homo sapiens OX=9606 GN=ITIH1 PE=1 SV=3	HUMAN	105
44	93.35	93.35	94.3	sp|O15240|VGF_HUMAN	Neurosecretory protein VGF OS=Homo sapiens OX=9606 GN=VGF PE=1 SV=2	HUMAN	103
45	92.74	92.74	84.5	sp|P10645|CMGA_HUMAN	Chromogranin-A OS=Homo sapiens OX=9606 GN=CHGA PE=1 SV=7	HUMAN	182
46	91.47	91.47	83	sp|P13591|NCAM1_HUMAN	Neural cell adhesion molecule 1 OS=Homo sapiens OX=9606 GN=NCAM1 PE=1 SV=3	HUMAN	127
47	90.2	90.2	78.8	sp|P09871|C1S_HUMAN	Complement C1s subcomponent OS=Homo sapiens OX=9606 GN=C1S PE=1 SV=1	HUMAN	107
48	87.81	87.81	100	Biognosys|iRT-Kit_WR_fusion	Biognosys|iRT-Kit_WR_fusion		260
49	85.93	85.93	85.3	sp|P43652|AFAM_HUMAN	Afamin OS=Homo sapiens OX=9606 GN=AFM PE=1 SV=1	HUMAN	96
50	82.78	82.79	97.5	sp|Q92876|KLK6_HUMAN	Kallikrein-6 OS=Homo sapiens OX=9606 GN=KLK6 PE=1 SV=1	HUMAN	127
51	82.24	82.24	72.6	tr|Q5T985|Q5T985_HUMAN	Inter-alpha-trypsin inhibitor heavy chain H2 OS=Homo sapiens OX=9606 GN=ITIH2 PE=1 SV=1	HUMAN	93
52	81.44	81.44	87.3	sp|P01857|IGHG1_HUMAN	Immunoglobulin heavy constant gamma 1 OS=Homo sapiens OX=9606 GN=IGHG1 PE=1 SV=1	HUMAN	139
53	79.79	79.79	100	sp|P68871|HBB_HUMAN	Hemoglobin subunit beta OS=Homo sapiens OX=9606 GN=HBB PE=1 SV=2	HUMAN	121
54	79.26	79.26	67.9	tr|A0A0U1RRJ0|A0A0U1RRJ0_HUMAN	Neurexin-3-beta OS=Homo sapiens OX=9606 GN=NRXN3 PE=1 SV=1	HUMAN	82
55	78.06	78.06	90	sp|Q8WXD2|SCG3_HUMAN	Secretogranin-3 OS=Homo sapiens OX=9606 GN=SCG3 PE=1 SV=3	HUMAN	91
56	77.7	77.7	88	sp|Q9UBP4|DKK3_HUMAN	Dickkopf-related protein 3 OS=Homo sapiens OX=9606 GN=DKK3 PE=1 SV=2	HUMAN	152
57	77.03	77.03	77.2	sp|P08697|A2AP_HUMAN	Alpha-2-antiplasmin OS=Homo sapiens OX=9606 GN=SERPINF2 PE=1 SV=3	HUMAN	106
58	76.84	76.84	90.2	sp|P02452|CO1A1_HUMAN	Collagen alpha-1(I) chain OS=Homo sapiens OX=9606 GN=COL1A1 PE=1 SV=5	HUMAN	80
59	75.15	75.15	45	sp|Q9Y6R7|FCGBP_HUMAN	IgGFc-binding protein OS=Homo sapiens OX=9606 GN=FCGBP PE=1 SV=3	HUMAN	100
60	74.56	74.56	80.1	sp|P10643|CO7_HUMAN	Complement component C7 OS=Homo sapiens OX=9606 GN=C7 PE=1 SV=2	HUMAN	94
61	74.44	74.52	85.7	tr|B4DPQ0|B4DPQ0_HUMAN	Complement C1r subcomponent OS=Homo sapiens OX=9606 GN=C1R PE=1 SV=1	HUMAN	109
62	71.83	71.83	63.1	sp|P04114|APOB_HUMAN	Apolipoprotein B-100 OS=Homo sapiens OX=9606 GN=APOB PE=1 SV=2	HUMAN	68
63	71.26	71.26	78.9	sp|P54289-2|CA2D1_HUMAN	Isoform 2 of Voltage-dependent calcium channel subunit alpha-2/delta-1 OS=Homo sapiens OX=9606 GN=CACNA2D1	HUMAN	63
64	66.74	66.74	74.1	tr|F8VVB6|F8VVB6_HUMAN	Protein kinase C-binding protein NELL2 OS=Homo sapiens OX=9606 GN=NELL2 PE=1 SV=1	HUMAN	69
65	66.42	66.43	65.9	sp|P04196|HRG_HUMAN	Histidine-rich glycoprotein OS=Homo sapiens OX=9606 GN=HRG PE=1 SV=1	HUMAN	91
66	65.95	65.95	83.6	sp|P05546|HEP2_HUMAN	Heparin cofactor 2 OS=Homo sapiens OX=9606 GN=SERPIND1 PE=1 SV=3	HUMAN	71
67	64.37	64.37	87.7	sp|P08571|CD14_HUMAN	Monocyte differentiation antigen CD14 OS=Homo sapiens OX=9606 GN=CD14 PE=1 SV=2	HUMAN	81
68	63.64	63.64	80.1	sp|P00734|THRB_HUMAN	Prothrombin OS=Homo sapiens OX=9606 GN=F2 PE=1 SV=2	HUMAN	71
69	63.57	63.57	77.5	sp|P01042|KNG1_HUMAN	Kininogen-1 OS=Homo sapiens OX=9606 GN=KNG1 PE=1 SV=2	HUMAN	81
70	62.95	62.95	60.3	sp|P10451-5|OSTP_HUMAN	Isoform 5 of Osteopontin OS=Homo sapiens OX=9606 GN=SPP1	HUMAN	121
71	61.43	61.43	62	sp|Q92859-2|NEO1_HUMAN	Isoform 2 of Neogenin OS=Homo sapiens OX=9606 GN=NEO1	HUMAN	52
72	60.58	60.58	82.8	sp|Q96PD5|PGRP2_HUMAN	N-acetylmuramoyl-L-alanine amidase OS=Homo sapiens OX=9606 GN=PGLYRP2 PE=1 SV=1	HUMAN	71
73	60.13	60.13	88.9	sp|Q15113|PCOC1_HUMAN	Procollagen C-endopeptidase enhancer 1 OS=Homo sapiens OX=9606 GN=PCOLCE PE=1 SV=2	HUMAN	55
74	59.99	59.99	74.8	tr|A0A087WTA8|A0A087WTA8_HUMAN	Collagen alpha-2(I) chain OS=Homo sapiens OX=9606 GN=COL1A2 PE=1 SV=1	HUMAN	53
75	59.93	59.93	68.5	sp|Q02246|CNTN2_HUMAN	Contactin-2 OS=Homo sapiens OX=9606 GN=CNTN2 PE=1 SV=1	HUMAN	62
76	59.79	59.79	91	sp|P02749|APOH_HUMAN	Beta-2-glycoprotein 1 OS=Homo sapiens OX=9606 GN=APOH PE=1 SV=3	HUMAN	132
77	59.68	59.68	76	tr|A0A087X0S5|A0A087X0S5_HUMAN	Collagen alpha-1(VI) chain OS=Homo sapiens OX=9606 GN=COL6A1 PE=1 SV=1	HUMAN	57
78	59.47	59.48	78.7	sp|P55058|PLTP_HUMAN	Phospholipid transfer protein OS=Homo sapiens OX=9606 GN=PLTP PE=1 SV=1	HUMAN	70
79	59.3	59.3	79	sp|Q08380|LG3BP_HUMAN	Galectin-3-binding protein OS=Homo sapiens OX=9606 GN=LGALS3BP PE=1 SV=1	HUMAN	82
80	58.63	58.63	79	sp|P61769|B2MG_HUMAN	Beta-2-microglobulin OS=Homo sapiens OX=9606 GN=B2M PE=1 SV=1	HUMAN	138
81	58.26	58.26	55.8	sp|Q7Z7M0|MEGF8_HUMAN	Multiple epidermal growth factor-like domains protein 8 OS=Homo sapiens OX=9606 GN=MEGF8 PE=1 SV=2	HUMAN	57
82	57.45	57.45	69.8	sp|P19021-6|AMD_HUMAN	Isoform 6 of Peptidyl-glycine alpha-amidating monooxygenase OS=Homo sapiens OX=9606 GN=PAM	HUMAN	46
83	56.69	64.08	83.7	sp|P08185|CBG_HUMAN	Corticosteroid-binding globulin OS=Homo sapiens OX=9606 GN=SERPINA6 PE=1 SV=1	HUMAN	74
84	56.61	56.61	93.2	tr|V9GYM3|V9GYM3_HUMAN	Apolipoprotein A-II OS=Homo sapiens OX=9606 GN=APOA2 PE=1 SV=1	HUMAN	103
85	55.44	57.58	68.1	sp|P01031|CO5_HUMAN	Complement C5 OS=Homo sapiens OX=9606 GN=C5 PE=1 SV=4	HUMAN	54
86	55.13	56.3	82.2	tr|H9KV31|H9KV31_HUMAN	Neural cell adhesion molecule 2 OS=Homo sapiens OX=9606 GN=NCAM2 PE=1 SV=2	HUMAN	51
87	53.96	53.96	85.8	sp|Q12805-2|FBLN3_HUMAN	Isoform 2 of EGF-containing fibulin-like extracellular matrix protein 1 OS=Homo sapiens OX=9606 GN=EFEMP1	HUMAN	96
88	53.42	53.42	48.9	sp|P78509-2|RELN_HUMAN	Isoform 2 of Reelin OS=Homo sapiens OX=9606 GN=RELN	HUMAN	62
89	51.93	51.93	86.2	sp|P02671-2|FIBA_HUMAN	Isoform 2 of Fibrinogen alpha chain OS=Homo sapiens OX=9606 GN=FGA	HUMAN	50
90	51.23	51.23	76.2	sp|P25311|ZA2G_HUMAN	Zinc-alpha-2-glycoprotein OS=Homo sapiens OX=9606 GN=AZGP1 PE=1 SV=2	HUMAN	77
91	50.43	50.43	65.8	sp|Q96GW7|PGCB_HUMAN	Brevican core protein OS=Homo sapiens OX=9606 GN=BCAN PE=1 SV=2	HUMAN	63
92	49.72	49.72	79.1	sp|P04004|VTNC_HUMAN	Vitronectin OS=Homo sapiens OX=9606 GN=VTN PE=1 SV=1	HUMAN	58
93	49.35	62.84	67.4	tr|A0A0R4J2G7|A0A0R4J2G7_HUMAN	Neurexin-1-beta OS=Homo sapiens OX=9606 GN=NRXN1 PE=1 SV=1	HUMAN	66
94	48.11	56.51	57.7	sp|P12259|FA5_HUMAN	Coagulation factor V OS=Homo sapiens OX=9606 GN=F5 PE=1 SV=4	HUMAN	72
95	47.62	47.62	75.2	sp|O75326|SEM7A_HUMAN	Semaphorin-7A OS=Homo sapiens OX=9606 GN=SEMA7A PE=1 SV=1	HUMAN	44
96	47.12	49.48	81.7	sp|P29622|KAIN_HUMAN	Kallistatin OS=Homo sapiens OX=9606 GN=SERPINA4 PE=1 SV=3	HUMAN	46
97	44.68	44.68	77.2	sp|Q9NQ79-3|CRAC1_HUMAN	Isoform 3 of Cartilage acidic protein 1 OS=Homo sapiens OX=9606 GN=CRTAC1	HUMAN	45
98	44.22	44.22	90.7	sp|P60709|ACTB_HUMAN	Actin, cytoplasmic 1 OS=Homo sapiens OX=9606 GN=ACTB PE=1 SV=1	HUMAN	37
99	43.2	43.2	81.6	sp|P16870-2|CBPE_HUMAN	Isoform 2 of Carboxypeptidase E OS=Homo sapiens OX=9606 GN=CPE	HUMAN	42
100	42.23	42.23	45.4	sp|P98160|PGBM_HUMAN	Basement membrane-specific heparan sulfate proteoglycan core protein OS=Homo sapiens OX=9606 GN=HSPG2 PE=1 SV=4	HUMAN	53
101	41.85	41.85	88.7	sp|P14618-2|KPYM_HUMAN	Isoform M1 of Pyruvate kinase PKM OS=Homo sapiens OX=9606 GN=PKM	HUMAN	34
102	41.55	41.55	69.7	sp|P07225|PROS_HUMAN	Vitamin K-dependent protein S OS=Homo sapiens OX=9606 GN=PROS1 PE=1 SV=1	HUMAN	41
103	41.3	41.3	65.4	tr|A0A1X7SBT7|A0A1X7SBT7_HUMAN	Neuronal pentraxin receptor OS=Homo sapiens OX=9606 GN=NPTXR PE=1 SV=1	HUMAN	48
104	41.28	41.3	83.8	sp|P04156|PRIO_HUMAN	Major prion protein OS=Homo sapiens OX=9606 GN=PRNP PE=1 SV=1	HUMAN	45
105	40.83	40.83	76	sp|Q15582|BGH3_HUMAN	Transforming growth factor-beta-induced protein ig-h3 OS=Homo sapiens OX=9606 GN=TGFBI PE=1 SV=1	HUMAN	43
106	40.74	40.74	71.5	sp|P20774|MIME_HUMAN	Mimecan OS=Homo sapiens OX=9606 GN=OGN PE=1 SV=1	HUMAN	57
107	40.62	40.62	81	sp|P02748|CO9_HUMAN	Complement component C9 OS=Homo sapiens OX=9606 GN=C9 PE=1 SV=2	HUMAN	52
108	40.59	40.62	88.3	sp|Q16270|IBP7_HUMAN	Insulin-like growth factor-binding protein 7 OS=Homo sapiens OX=9606 GN=IGFBP7 PE=1 SV=1	HUMAN	59
109	40.39	40.39	96.2	sp|Q9UHG2|PCSK1_HUMAN	ProSAAS OS=Homo sapiens OX=9606 GN=PCSK1N PE=1 SV=1	HUMAN	42
110	40.03	40.03	76.7	sp|Q92520|FAM3C_HUMAN	Protein FAM3C OS=Homo sapiens OX=9606 GN=FAM3C PE=1 SV=1	HUMAN	62
111	39.92	39.92	72.9	sp|P36222|CH3L1_HUMAN	Chitinase-3-like protein 1 OS=Homo sapiens OX=9606 GN=CHI3L1 PE=1 SV=2	HUMAN	51
112	39.19	39.19	87.1	sp|P08253|MMP2_HUMAN	72 kDa type IV collagenase OS=Homo sapiens OX=9606 GN=MMP2 PE=1 SV=2	HUMAN	39
113	38.91	39.14	74.1	tr|G3XAM2|G3XAM2_HUMAN	Complement factor I OS=Homo sapiens OX=9606 GN=CFI PE=1 SV=1	HUMAN	48
114	38.17	38.17	84	sp|Q02818|NUCB1_HUMAN	Nucleobindin-1 OS=Homo sapiens OX=9606 GN=NUCB1 PE=1 SV=4	HUMAN	24
115	38.07	38.07	76.8	sp|P78324|SHPS1_HUMAN	Tyrosine-protein phosphatase non-receptor type substrate 1 OS=Homo sapiens OX=9606 GN=SIRPA PE=1 SV=2	HUMAN	37
116	37.82	37.82	76.9	sp|P07602|SAP_HUMAN	Prosaposin OS=Homo sapiens OX=9606 GN=PSAP PE=1 SV=2	HUMAN	38
117	37.78	37.78	85	sp|P24592|IBP6_HUMAN	Insulin-like growth factor-binding protein 6 OS=Homo sapiens OX=9606 GN=IGFBP6 PE=1 SV=1	HUMAN	44
118	37.5	37.5	85.7	sp|Q16610|ECM1_HUMAN	Extracellular matrix protein 1 OS=Homo sapiens OX=9606 GN=ECM1 PE=1 SV=2	HUMAN	38
119	36.89	38.95	72.5	sp|P05543|THBG_HUMAN	Thyroxine-binding globulin OS=Homo sapiens OX=9606 GN=SERPINA7 PE=1 SV=2	HUMAN	54
120	36.83	36.83	65.6	sp|P43251-4|BTD_HUMAN	Isoform 4 of Biotinidase OS=Homo sapiens OX=9606 GN=BTD	HUMAN	48
121	36.65	36.65	87	sp|P02750|A2GL_HUMAN	Leucine-rich alpha-2-glycoprotein OS=Homo sapiens OX=9606 GN=LRG1 PE=1 SV=2	HUMAN	54
122	36.54	36.54	46.4	tr|A0A140TA41|A0A140TA41_HUMAN	Tenascin-X OS=Homo sapiens OX=9606 GN=TNXB PE=1 SV=1	HUMAN	35
123	36.21	36.21	91.7	sp|P13521|SCG2_HUMAN	Secretogranin-2 OS=Homo sapiens OX=9606 GN=SCG2 PE=1 SV=2	HUMAN	43
124	35.54	35.54	73.2	sp|P27169|PON1_HUMAN	Serum paraoxonase/arylesterase 1 OS=Homo sapiens OX=9606 GN=PON1 PE=1 SV=3	HUMAN	27
125	35.34	99.48	84.1	sp|P23142|FBLN1_HUMAN	Fibulin-1 OS=Homo sapiens OX=9606 GN=FBLN1 PE=1 SV=4	HUMAN	149
126	35.12	35.14	73.6	sp|P09486|SPRC_HUMAN	SPARC OS=Homo sapiens OX=9606 GN=SPARC PE=1 SV=1	HUMAN	30
127	35.08	35.08	74.7	sp|P13671|CO6_HUMAN	Complement component C6 OS=Homo sapiens OX=9606 GN=C6 PE=1 SV=3	HUMAN	31
128	34.94	35.27	60.1	sp|Q9C0A0-2|CNTP4_HUMAN	Isoform 2 of Contactin-associated protein-like 4 OS=Homo sapiens OX=9606 GN=CNTNAP4	HUMAN	30
129	34.5	34.5	45.6	sp|Q24JP5|T132A_HUMAN	Transmembrane protein 132A OS=Homo sapiens OX=9606 GN=TMEM132A PE=1 SV=1	HUMAN	22
130	34.34	34.34	85.5	sp|P02760|AMBP_HUMAN	Protein AMBP OS=Homo sapiens OX=9606 GN=AMBP PE=1 SV=1	HUMAN	33
131	34.18	34.22	72.5	tr|H7BY57|H7BY57_HUMAN	Neurofascin (Fragment) OS=Homo sapiens OX=9606 GN=NFASC PE=1 SV=1	HUMAN	33
132	33.96	33.96	87.4	sp|P04075|ALDOA_HUMAN	Fructose-bisphosphate aldolase A OS=Homo sapiens OX=9606 GN=ALDOA PE=1 SV=2	HUMAN	32
133	33.77	33.77	46.4	sp|P19022|CADH2_HUMAN	Cadherin-2 OS=Homo sapiens OX=9606 GN=CDH2 PE=1 SV=4	HUMAN	25
134	33.65	33.65	69.3	tr|A0A1B0GWE8|A0A1B0GWE8_HUMAN	Cathepsin D OS=Homo sapiens OX=9606 GN=CTSD PE=1 SV=1	HUMAN	51
135	33.16	33.16	47.3	sp|P23471|PTPRZ_HUMAN	Receptor-type tyrosine-protein phosphatase zeta OS=Homo sapiens OX=9606 GN=PTPRZ1 PE=1 SV=4	HUMAN	48
136	32.83	32.83	92.3	sp|Q13449|LSAMP_HUMAN	Limbic system-associated membrane protein OS=Homo sapiens OX=9606 GN=LSAMP PE=1 SV=2	HUMAN	47
137	32.54	32.54	77.6	sp|P04264|K2C1_HUMAN	Keratin, type II cytoskeletal 1 OS=Homo sapiens OX=9606 GN=KRT1 PE=1 SV=6	HUMAN	20
138	32.49	32.49	68.6	sp|P35858|ALS_HUMAN	Insulin-like growth factor-binding protein complex acid labile subunit OS=Homo sapiens OX=9606 GN=IGFALS PE=1 SV=1	HUMAN	21
139	31.95	31.95	66.9	sp|P02461|CO3A1_HUMAN	Collagen alpha-1(III) chain OS=Homo sapiens OX=9606 GN=COL3A1 PE=1 SV=4	HUMAN	34
140	31.32	31.32	75.9	sp|Q15818|NPTX1_HUMAN	Neuronal pentraxin-1 OS=Homo sapiens OX=9606 GN=NPTX1 PE=2 SV=2	HUMAN	24
141	31.28	31.28	62.1	tr|C9J2H1|C9J2H1_HUMAN	Inter-alpha-trypsin inhibitor heavy chain H5 OS=Homo sapiens OX=9606 GN=ITIH5 PE=1 SV=2	HUMAN	36
142	30.57	30.57	89	sp|Q96S96|PEBP4_HUMAN	Phosphatidylethanolamine-binding protein 4 OS=Homo sapiens OX=9606 GN=PEBP4 PE=1 SV=3	HUMAN	29
143	30.4	30.4	87.4	tr|D6RBV2|D6RBV2_HUMAN	Vesicular integral-membrane protein VIP36 OS=Homo sapiens OX=9606 GN=LMAN2 PE=1 SV=1	HUMAN	28
144	30.34	32.35	32	tr|E9PEK4|E9PEK4_HUMAN	Macrophage colony-stimulating factor 1 receptor OS=Homo sapiens OX=9606 GN=CSF1R PE=1 SV=1	HUMAN	25
145	30.22	30.22	64.7	sp|Q14118|DAG1_HUMAN	Dystroglycan OS=Homo sapiens OX=9606 GN=DAG1 PE=1 SV=2	HUMAN	39
146	29.89	29.9	77.1	sp|P08294|SODE_HUMAN	Extracellular superoxide dismutase [Cu-Zn] OS=Homo sapiens OX=9606 GN=SOD3 PE=1 SV=2	HUMAN	47
147	29.81	29.81	77.8	sp|P51884|LUM_HUMAN	Lumican OS=Homo sapiens OX=9606 GN=LUM PE=1 SV=2	HUMAN	38
148	29.59	29.59	86.1	sp|P02763|A1AG1_HUMAN	Alpha-1-acid glycoprotein 1 OS=Homo sapiens OX=9606 GN=ORM1 PE=1 SV=1	HUMAN	40
149	29.36	29.36	71.9	sp|O14773|TPP1_HUMAN	Tripeptidyl-peptidase 1 OS=Homo sapiens OX=9606 GN=TPP1 PE=1 SV=2	HUMAN	19
150	29.31	29.31	73.4	sp|O00391|QSOX1_HUMAN	Sulfhydryl oxidase 1 OS=Homo sapiens OX=9606 GN=QSOX1 PE=1 SV=3	HUMAN	21
151	29.21	29.21	68.6	sp|Q13740-2|CD166_HUMAN	Isoform 2 of CD166 antigen OS=Homo sapiens OX=9606 GN=ALCAM	HUMAN	24
152	29.2	29.2	46.2	sp|Q9NYQ8|FAT2_HUMAN	Protocadherin Fat 2 OS=Homo sapiens OX=9606 GN=FAT2 PE=1 SV=2	HUMAN	28
153	28.66	28.66	90	tr|Q5VY30|Q5VY30_HUMAN	Retinol-binding protein OS=Homo sapiens OX=9606 GN=RBP4 PE=1 SV=2	HUMAN	57
154	28.57	28.57	53.7	sp|P14543-2|NID1_HUMAN	Isoform 2 of Nidogen-1 OS=Homo sapiens OX=9606 GN=NID1	HUMAN	19
155	28.24	28.25	84.5	sp|P17174|AATC_HUMAN	Aspartate aminotransferase, cytoplasmic OS=Homo sapiens OX=9606 GN=GOT1 PE=1 SV=3	HUMAN	23
156	28.05	28.05	68	sp|P03952|KLKB1_HUMAN	Plasma kallikrein OS=Homo sapiens OX=9606 GN=KLKB1 PE=1 SV=1	HUMAN	19
157	28	28	81.7	sp|P02675|FIBB_HUMAN	Fibrinogen beta chain OS=Homo sapiens OX=9606 GN=FGB PE=1 SV=2	HUMAN	23
158	27.87	27.87	76.6	sp|P04180|LCAT_HUMAN	Phosphatidylcholine-sterol acyltransferase OS=Homo sapiens OX=9606 GN=LCAT PE=1 SV=1	HUMAN	22
159	27.78	27.78	76.1	sp|P13796|PLSL_HUMAN	Plastin-2 OS=Homo sapiens OX=9606 GN=LCP1 PE=1 SV=6	HUMAN	21
160	27.77	27.77	69.4	tr|F5GY80|F5GY80_HUMAN	Complement component C8 beta chain OS=Homo sapiens OX=9606 GN=C8B PE=1 SV=1	HUMAN	23
161	27.48	27.48	61	sp|Q9NT99|LRC4B_HUMAN	Leucine-rich repeat-containing protein 4B OS=Homo sapiens OX=9606 GN=LRRC4B PE=2 SV=3	HUMAN	21
162	27.43	27.43	92.9	sp|P00441|SODC_HUMAN	Superoxide dismutase [Cu-Zn] OS=Homo sapiens OX=9606 GN=SOD1 PE=1 SV=2	HUMAN	37
163	27.36	27.36	76.3	sp|P01033|TIMP1_HUMAN	Metalloproteinase inhibitor 1 OS=Homo sapiens OX=9606 GN=TIMP1 PE=1 SV=1	HUMAN	27
164	27.29	27.29	71.2	tr|C9JF17|C9JF17_HUMAN	Apolipoprotein D (Fragment) OS=Homo sapiens OX=9606 GN=APOD PE=1 SV=1	HUMAN	50
165	26.96	27.29	46.9	sp|O14594|NCAN_HUMAN	Neurocan core protein OS=Homo sapiens OX=9606 GN=NCAN PE=1 SV=3	HUMAN	39
166	26.64	26.64	68.7	sp|P07357|CO8A_HUMAN	Complement component C8 alpha chain OS=Homo sapiens OX=9606 GN=C8A PE=1 SV=2	HUMAN	27
167	26.54	26.54	49.4	tr|Q3KPI9|Q3KPI9_HUMAN	PTPRD protein OS=Homo sapiens OX=9606 GN=PTPRD PE=1 SV=1	HUMAN	22
168	26.37	26.37	70.8	sp|P11021|BIP_HUMAN	Endoplasmic reticulum chaperone BiP OS=Homo sapiens OX=9606 GN=HSPA5 PE=1 SV=2	HUMAN	18
169	26.29	26.29	56	sp|P32004-2|L1CAM_HUMAN	Isoform 2 of Neural cell adhesion molecule L1 OS=Homo sapiens OX=9606 GN=L1CAM	HUMAN	19
170	25.47	25.47	90.5	sp|P18065|IBP2_HUMAN	Insulin-like growth factor-binding protein 2 OS=Homo sapiens OX=9606 GN=IGFBP2 PE=1 SV=2	HUMAN	24
171	25.37	25.37	65.1	sp|P55290|CAD13_HUMAN	Cadherin-13 OS=Homo sapiens OX=9606 GN=CDH13 PE=1 SV=1	HUMAN	31
172	25.22	25.22	94	sp|Q01995|TAGL_HUMAN	Transgelin OS=Homo sapiens OX=9606 GN=TAGLN PE=1 SV=4	HUMAN	22
173	24.76	31.38	63.1	sp|Q06481-3|APLP2_HUMAN	Isoform 3 of Amyloid-like protein 2 OS=Homo sapiens OX=9606 GN=APLP2	HUMAN	40
174	24.53	25.42	72.4	sp|P05154|IPSP_HUMAN	Plasma serine protease inhibitor OS=Homo sapiens OX=9606 GN=SERPINA5 PE=1 SV=3	HUMAN	26
175	24.43	24.43	64.4	sp|Q99574|NEUS_HUMAN	Neuroserpin OS=Homo sapiens OX=9606 GN=SERPINI1 PE=1 SV=1	HUMAN	22
176	24.34	24.34	87.1	sp|P27797|CALR_HUMAN	Calreticulin OS=Homo sapiens OX=9606 GN=CALR PE=1 SV=1	HUMAN	14
177	24.16	24.16	87.6	tr|C9J650|C9J650_HUMAN	Neuroendocrine protein 7B2 OS=Homo sapiens OX=9606 GN=SCG5 PE=1 SV=1	HUMAN	21
178	24.07	24.07	68.3	sp|P05452|TETN_HUMAN	Tetranectin OS=Homo sapiens OX=9606 GN=CLEC3B PE=1 SV=3	HUMAN	41
179	24.03	24.03	51.5	tr|B7ZLJ8|B7ZLJ8_HUMAN	SEZ6L protein OS=Homo sapiens OX=9606 GN=SEZ6L PE=1 SV=1	HUMAN	30
180	24.02	24.03	75.5	tr|A0A096LP69|A0A096LP69_HUMAN	CD99 antigen OS=Homo sapiens OX=9606 GN=CD99 PE=1 SV=1	HUMAN	23
181	23.89	23.89	55.9	sp|Q14982-2|OPCM_HUMAN	Isoform 2 of Opioid-binding protein/cell adhesion molecule OS=Homo sapiens OX=9606 GN=OPCML	HUMAN	28
182	23.49	23.49	90.4	sp|P30086|PEBP1_HUMAN	Phosphatidylethanolamine-binding protein 1 OS=Homo sapiens OX=9606 GN=PEBP1 PE=1 SV=3	HUMAN	21
183	23.44	23.44	78.2	sp|P16035|TIMP2_HUMAN	Metalloproteinase inhibitor 2 OS=Homo sapiens OX=9606 GN=TIMP2 PE=1 SV=2	HUMAN	27
184	23.43	23.43	61.3	sp|Q8N126|CADM3_HUMAN	Cell adhesion molecule 3 OS=Homo sapiens OX=9606 GN=CADM3 PE=1 SV=1	HUMAN	20
185	23.02	23.02	56.4	sp|P01876|IGHA1_HUMAN	Immunoglobulin heavy constant alpha 1 OS=Homo sapiens OX=9606 GN=IGHA1 PE=1 SV=2	HUMAN	26
186	22.99	22.99	69.9	tr|H7BXV5|H7BXV5_HUMAN	Collagen alpha-1(XVIII) chain (Fragment) OS=Homo sapiens OX=9606 GN=COL18A1 PE=1 SV=1	HUMAN	20
187	22.92	26.19	60.1	sp|P19320|VCAM1_HUMAN	Vascular cell adhesion protein 1 OS=Homo sapiens OX=9606 GN=VCAM1 PE=1 SV=1	HUMAN	20
188	22.9	22.92	58.4	sp|P00748|FA12_HUMAN	Coagulation factor XII OS=Homo sapiens OX=9606 GN=F12 PE=1 SV=3	HUMAN	26
189	22.77	22.77	88	sp|P09104|ENOG_HUMAN	Gamma-enolase OS=Homo sapiens OX=9606 GN=ENO2 PE=1 SV=3	HUMAN	14
190	22.73	22.73	70.3	tr|A0A0A0MQX7|A0A0A0MQX7_HUMAN	Testican-1 OS=Homo sapiens OX=9606 GN=SPOCK1 PE=1 SV=1	HUMAN	15
191	22.63	22.63	76.3	sp|P00915|CAH1_HUMAN	Carbonic anhydrase 1 OS=Homo sapiens OX=9606 GN=CA1 PE=1 SV=2	HUMAN	17
192	22.47	22.48	58.4	sp|P12111|CO6A3_HUMAN	Collagen alpha-3(VI) chain OS=Homo sapiens OX=9606 GN=COL6A3 PE=1 SV=5	HUMAN	26
193	22.35	22.35	51.8	sp|P07477|TRY1_HUMAN	Trypsin-1 OS=Homo sapiens OX=9606 GN=PRSS1 PE=1 SV=1	HUMAN	157
194	22.24	22.25	62.1	sp|P43121|MUC18_HUMAN	Cell surface glycoprotein MUC18 OS=Homo sapiens OX=9606 GN=MCAM PE=1 SV=2	HUMAN	25
195	22.19	22.19	72.9	sp|Q8NBJ4-2|GOLM1_HUMAN	Isoform 2 of Golgi membrane protein 1 OS=Homo sapiens OX=9606 GN=GOLM1	HUMAN	13
196	22.16	22.16	44.4	sp|Q6UX71|PXDC2_HUMAN	Plexin domain-containing protein 2 OS=Homo sapiens OX=9606 GN=PLXDC2 PE=1 SV=1	HUMAN	18
197	22.09	22.09	58.6	tr|E9PG71|E9PG71_HUMAN	Ephrin type-A receptor 4 OS=Homo sapiens OX=9606 GN=EPHA4 PE=1 SV=1	HUMAN	22
198	22.09	22.09	85.4	sp|P61916|NPC2_HUMAN	NPC intracellular cholesterol transporter 2 OS=Homo sapiens OX=9606 GN=NPC2 PE=1 SV=1	HUMAN	38
199	21.99	21.99	79.1	sp|P07585|PGS2_HUMAN	Decorin OS=Homo sapiens OX=9606 GN=DCN PE=1 SV=1	HUMAN	16
200	21.96	21.96	60.2	sp|P07195|LDHB_HUMAN	L-lactate dehydrogenase B chain OS=Homo sapiens OX=9606 GN=LDHB PE=1 SV=2	HUMAN	21
201	21.46	21.46	71.2	sp|P33908|MA1A1_HUMAN	Mannosyl-oligosaccharide 1,2-alpha-mannosidase IA OS=Homo sapiens OX=9606 GN=MAN1A1 PE=1 SV=3	HUMAN	16
202	21.45	21.45	89.1	sp|P07360|CO8G_HUMAN	Complement component C8 gamma chain OS=Homo sapiens OX=9606 GN=C8G PE=1 SV=3	HUMAN	18
203	21.31	21.31	44.7	sp|Q07954|LRP1_HUMAN	Prolow-density lipoprotein receptor-related protein 1 OS=Homo sapiens OX=9606 GN=LRP1 PE=1 SV=2	HUMAN	27
204	21.3	21.3	71.5	sp|P01210|PENK_HUMAN	Proenkephalin-A OS=Homo sapiens OX=9606 GN=PENK PE=1 SV=1	HUMAN	20
205	21.25	21.25	66.7	sp|Q13228|SBP1_HUMAN	Methanethiol oxidase OS=Homo sapiens OX=9606 GN=SELENBP1 PE=1 SV=2	HUMAN	13
206	21.22	21.22	66.1	sp|Q8WZA1|PMGT1_HUMAN	Protein O-linked-mannose beta-1,2-N-acetylglucosaminyltransferase 1 OS=Homo sapiens OX=9606 GN=POMGNT1 PE=1 SV=2	HUMAN	13
207	21.11	21.11	75.9	sp|P02745|C1QA_HUMAN	Complement C1q subcomponent subunit A OS=Homo sapiens OX=9606 GN=C1QA PE=1 SV=2	HUMAN	23
208	20.83	20.83	68.7	sp|Q6UX73-2|CP089_HUMAN	Isoform 2 of UPF0764 protein C16orf89 OS=Homo sapiens OX=9606 GN=C16orf89	HUMAN	15
209	20.79	20.79	54.8	sp|Q6MZW2|FSTL4_HUMAN	Follistatin-related protein 4 OS=Homo sapiens OX=9606 GN=FSTL4 PE=2 SV=3	HUMAN	14
210	20.61	20.61	60	tr|F5GZZ9|F5GZZ9_HUMAN	Scavenger receptor cysteine-rich type 1 protein M130 OS=Homo sapiens OX=9606 GN=CD163 PE=1 SV=1	HUMAN	15
211	20.58	20.58	64.5	sp|P49641-2|MA2A2_HUMAN	Isoform 2 of Alpha-mannosidase 2x OS=Homo sapiens OX=9606 GN=MAN2A2	HUMAN	13
212	20.57	20.57	60.5	sp|Q9BZR6|RTN4R_HUMAN	Reticulon-4 receptor OS=Homo sapiens OX=9606 GN=RTN4R PE=1 SV=1	HUMAN	16
213	20.56	20.56	56.5	sp|Q8TCZ2|C99L2_HUMAN	CD99 antigen-like protein 2 OS=Homo sapiens OX=9606 GN=CD99L2 PE=1 SV=1	HUMAN	15
214	20.15	20.15	51.7	sp|O00468-6|AGRIN_HUMAN	Isoform 6 of Agrin OS=Homo sapiens OX=9606 GN=AGRN	HUMAN	18
215	20.09	20.09	62.5	sp|P23515|OMGP_HUMAN	Oligodendrocyte-myelin glycoprotein OS=Homo sapiens OX=9606 GN=OMG PE=1 SV=2	HUMAN	17
216	19.81	19.81	72.6	sp|Q7Z3B1|NEGR1_HUMAN	Neuronal growth regulator 1 OS=Homo sapiens OX=9606 GN=NEGR1 PE=1 SV=3	HUMAN	25
217	19.77	19.77	50	sp|Q15904|VAS1_HUMAN	V-type proton ATPase subunit S1 OS=Homo sapiens OX=9606 GN=ATP6AP1 PE=1 SV=2	HUMAN	15
218	19.57	19.57	50.1	sp|Q9NX62|IMPA3_HUMAN	Inositol monophosphatase 3 OS=Homo sapiens OX=9606 GN=IMPAD1 PE=1 SV=1	HUMAN	13
219	19.56	19.56	84.3	sp|P60174|TPIS_HUMAN	Triosephosphate isomerase OS=Homo sapiens OX=9606 GN=TPI1 PE=1 SV=3	HUMAN	15
220	19.47	19.47	89.7	sp|P01834|IGKC_HUMAN	Immunoglobulin kappa constant OS=Homo sapiens OX=9606 GN=IGKC PE=1 SV=2	HUMAN	25
221	19.05	20.45	43.1	sp|Q6UXD5-3|SE6L2_HUMAN	Isoform 3 of Seizure 6-like protein 2 OS=Homo sapiens OX=9606 GN=SEZ6L2	HUMAN	23
222	18.8	18.8	58.2	tr|C9J6G4|C9J6G4_HUMAN	WAP, Kazal, immunoglobulin, Kunitz and NTR domain-containing protein 2 OS=Homo sapiens OX=9606 GN=WFIKKN2 PE=1 SV=1	HUMAN	12
223	18.74	18.74	53.5	sp|O60888-2|CUTA_HUMAN	Isoform A of Protein CutA OS=Homo sapiens OX=9606 GN=CUTA	HUMAN	26
224	18.64	18.64	53.9	sp|Q13332-7|PTPRS_HUMAN	Isoform 3 of Receptor-type tyrosine-protein phosphatase S OS=Homo sapiens OX=9606 GN=PTPRS	HUMAN	21
225	18.45	18.45	82	sp|P01344-2|IGF2_HUMAN	Isoform 2 of Insulin-like growth factor II OS=Homo sapiens OX=9606 GN=IGF2	HUMAN	15
226	18.38	18.38	81.5	sp|P23284|PPIB_HUMAN	Peptidyl-prolyl cis-trans isomerase B OS=Homo sapiens OX=9606 GN=PPIB PE=1 SV=2	HUMAN	18
227	17.95	23.74	56.1	sp|Q9P121-4|NTRI_HUMAN	Isoform 4 of Neurotrimin OS=Homo sapiens OX=9606 GN=NTM	HUMAN	29
228	17.9	17.9	56.8	sp|P07686|HEXB_HUMAN	Beta-hexosaminidase subunit beta OS=Homo sapiens OX=9606 GN=HEXB PE=1 SV=3	HUMAN	11
229	17.89	17.89	60.8	sp|P00738|HPT_HUMAN	Haptoglobin OS=Homo sapiens OX=9606 GN=HP PE=1 SV=1	HUMAN	16
230	17.74	22.28	95.8	tr|A8MVZ9|A8MVZ9_HUMAN	Fructose-bisphosphate aldolase OS=Homo sapiens OX=9606 GN=ALDOC PE=1 SV=1	HUMAN	20
231	17.65	17.65	80.4	sp|P63104|1433Z_HUMAN	14-3-3 protein zeta/delta OS=Homo sapiens OX=9606 GN=YWHAZ PE=1 SV=1	HUMAN	12
232	17.55	17.55	74	sp|P07858|CATB_HUMAN	Cathepsin B OS=Homo sapiens OX=9606 GN=CTSB PE=1 SV=3	HUMAN	15
233	17.47	17.47	46	sp|P26992|CNTFR_HUMAN	Ciliary neurotrophic factor receptor subunit alpha OS=Homo sapiens OX=9606 GN=CNTFR PE=1 SV=2	HUMAN	10
234	17.34	17.34	55.4	sp|Q92820|GGH_HUMAN	Gamma-glutamyl hydrolase OS=Homo sapiens OX=9606 GN=GGH PE=1 SV=2	HUMAN	13
235	16.97	16.97	71.1	sp|Q8WVQ1-3|CANT1_HUMAN	Isoform 3 of Soluble calcium-activated nucleotidase 1 OS=Homo sapiens OX=9606 GN=CANT1	HUMAN	10
236	16.82	16.82	57.8	sp|P40189|IL6RB_HUMAN	Interleukin-6 receptor subunit beta OS=Homo sapiens OX=9606 GN=IL6ST PE=1 SV=2	HUMAN	16
237	16.79	16.79	51.8	sp|Q9HAT2|SIAE_HUMAN	Sialate O-acetylesterase OS=Homo sapiens OX=9606 GN=SIAE PE=1 SV=1	HUMAN	13
238	16.76	16.76	81.4	tr|C9J8Z4|C9J8Z4_HUMAN	Immunoglobulin superfamily member 8 (Fragment) OS=Homo sapiens OX=9606 GN=IGSF8 PE=1 SV=1	HUMAN	15
239	16.73	16.76	67.1	sp|P22692|IBP4_HUMAN	Insulin-like growth factor-binding protein 4 OS=Homo sapiens OX=9606 GN=IGFBP4 PE=1 SV=2	HUMAN	10
240	16.73	16.73	66.6	sp|O94919|ENDD1_HUMAN	Endonuclease domain-containing 1 protein OS=Homo sapiens OX=9606 GN=ENDOD1 PE=1 SV=2	HUMAN	17
241	16.72	16.72	63.3	sp|P35052|GPC1_HUMAN	Glypican-1 OS=Homo sapiens OX=9606 GN=GPC1 PE=1 SV=2	HUMAN	10
242	16.33	18.26	59.1	sp|Q53EL9-3|SEZ6_HUMAN	Isoform 3 of Seizure protein 6 homolog OS=Homo sapiens OX=9606 GN=SEZ6	HUMAN	26
243	16.21	489.21	92	tr|F5GXS0|F5GXS0_HUMAN	Complement C4-B OS=Homo sapiens OX=9606 GN=C4B PE=1 SV=1	HUMAN	960
244	16.12	18.17	65.7	sp|P02747|C1QC_HUMAN	Complement C1q subcomponent subunit C OS=Homo sapiens OX=9606 GN=C1QC PE=1 SV=3	HUMAN	20
245	16.07	16.07	55.1	sp|Q9NS98|SEM3G_HUMAN	Semaphorin-3G OS=Homo sapiens OX=9606 GN=SEMA3G PE=2 SV=1	HUMAN	10
246	16.05	16.05	63.4	sp|Q8NFZ8|CADM4_HUMAN	Cell adhesion molecule 4 OS=Homo sapiens OX=9606 GN=CADM4 PE=1 SV=1	HUMAN	17
247	16.03	16.03	38.9	sp|P06276|CHLE_HUMAN	Cholinesterase OS=Homo sapiens OX=9606 GN=BCHE PE=1 SV=1	HUMAN	10
248	15.84	15.84	51	tr|A0A182DWH7|A0A182DWH7_HUMAN	Selenoprotein P (Fragment) OS=Homo sapiens OX=9606 GN=SELENOP PE=1 SV=1	HUMAN	13
249	15.79	15.79	42.3	sp|P42785|PCP_HUMAN	Lysosomal Pro-X carboxypeptidase OS=Homo sapiens OX=9606 GN=PRCP PE=1 SV=1	HUMAN	11
250	15.69	15.7	56.2	tr|H3BS10|H3BS10_HUMAN	Beta-hexosaminidase OS=Homo sapiens OX=9606 GN=HEXA PE=1 SV=1	HUMAN	13
251	15.66	15.66	45.3	sp|P23470-2|PTPRG_HUMAN	Isoform 2 of Receptor-type tyrosine-protein phosphatase gamma OS=Homo sapiens OX=9606 GN=PTPRG	HUMAN	10
252	15.5	15.5	67.9	sp|P07711|CATL1_HUMAN	Cathepsin L1 OS=Homo sapiens OX=9606 GN=CTSL PE=1 SV=2	HUMAN	14
253	15.42	15.42	42.8	sp|Q6UXB8|PI16_HUMAN	Peptidase inhibitor 16 OS=Homo sapiens OX=9606 GN=PI16 PE=1 SV=1	HUMAN	25
254	15.21	15.21	71.9	sp|P02679-2|FIBG_HUMAN	Isoform Gamma-A of Fibrinogen gamma chain OS=Homo sapiens OX=9606 GN=FGG	HUMAN	12
255	15.15	15.15	44	tr|A0A087X1J7|A0A087X1J7_HUMAN	Glutathione peroxidase OS=Homo sapiens OX=9606 GN=GPX3 PE=1 SV=1	HUMAN	22
256	15.09	15.11	54.5	sp|Q96PX8|SLIK1_HUMAN	SLIT and NTRK-like protein 1 OS=Homo sapiens OX=9606 GN=SLITRK1 PE=1 SV=2	HUMAN	15
257	14.94	14.94	60.7	sp|Q9BY67-2|CADM1_HUMAN	Isoform 2 of Cell adhesion molecule 1 OS=Homo sapiens OX=9606 GN=CADM1	HUMAN	13
258	14.93	14.94	52.3	tr|I3L145|I3L145_HUMAN	Sex hormone-binding globulin OS=Homo sapiens OX=9606 GN=SHBG PE=1 SV=1	HUMAN	10
259	14.88	65.81	92	sp|P01859|IGHG2_HUMAN	Immunoglobulin heavy constant gamma 2 OS=Homo sapiens OX=9606 GN=IGHG2 PE=1 SV=2	HUMAN	89
260	14.84	14.84	74.8	sp|Q9Y646|CBPQ_HUMAN	Carboxypeptidase Q OS=Homo sapiens OX=9606 GN=CPQ PE=1 SV=1	HUMAN	15
261	14.82	14.82	78.6	tr|B4DNG0|B4DNG0_HUMAN	Olfactomedin-like protein 3 OS=Homo sapiens OX=9606 GN=OLFML3 PE=1 SV=1	HUMAN	11
262	14.78	14.78	54.4	sp|Q96FE7|P3IP1_HUMAN	Phosphoinositide-3-kinase-interacting protein 1 OS=Homo sapiens OX=9606 GN=PIK3IP1 PE=1 SV=2	HUMAN	12
263	14.77	14.77	64.9	tr|E7EPF1|E7EPF1_HUMAN	Disintegrin and metalloproteinase domain-containing protein 22 OS=Homo sapiens OX=9606 GN=ADAM22 PE=1 SV=1	HUMAN	14
264	14.75	14.75	40.4	sp|Q6EMK4|VASN_HUMAN	Vasorin OS=Homo sapiens OX=9606 GN=VASN PE=1 SV=1	HUMAN	11
265	14.6	14.6	67.3	sp|O14498|ISLR_HUMAN	Immunoglobulin superfamily containing leucine-rich repeat protein OS=Homo sapiens OX=9606 GN=ISLR PE=2 SV=1	HUMAN	13
266	14.48	14.48	65.2	sp|O00584|RNT2_HUMAN	Ribonuclease T2 OS=Homo sapiens OX=9606 GN=RNASET2 PE=1 SV=2	HUMAN	18
267	14.22	14.22	47.9	sp|O60279|SUSD5_HUMAN	Sushi domain-containing protein 5 OS=Homo sapiens OX=9606 GN=SUSD5 PE=1 SV=3	HUMAN	9
268	14.21	14.21	56.7	sp|Q9HAR2-3|AGRL3_HUMAN	Isoform 3 of Adhesion G protein-coupled receptor L3 OS=Homo sapiens OX=9606 GN=ADGRL3	HUMAN	10
269	14.17	14.17	50	sp|P11362-9|FGFR1_HUMAN	Isoform 5 of Fibroblast growth factor receptor 1 OS=Homo sapiens OX=9606 GN=FGFR1	HUMAN	14
270	14.11	25.12	53.6	sp|Q9P2S2-2|NRX2A_HUMAN	Isoform 2a of Neurexin-2 OS=Homo sapiens OX=9606 GN=NRXN2	HUMAN	34
271	14.11	14.11	44.8	sp|Q9UHC6|CNTP2_HUMAN	Contactin-associated protein-like 2 OS=Homo sapiens OX=9606 GN=CNTNAP2 PE=1 SV=1	HUMAN	12
272	14.07	14.07	59.1	sp|Q9HCB6|SPON1_HUMAN	Spondin-1 OS=Homo sapiens OX=9606 GN=SPON1 PE=1 SV=2	HUMAN	9
273	14.03	14.03	85.2	sp|P07108-3|ACBP_HUMAN	Isoform 3 of Acyl-CoA-binding protein OS=Homo sapiens OX=9606 GN=DBI	HUMAN	10
274	14.02	14.02	73	sp|Q8N3J6-2|CADM2_HUMAN	Isoform 2 of Cell adhesion molecule 2 OS=Homo sapiens OX=9606 GN=CADM2	HUMAN	8
275	14.01	14.01	98.6	sp|P07737|PROF1_HUMAN	Profilin-1 OS=Homo sapiens OX=9606 GN=PFN1 PE=1 SV=2	HUMAN	10
276	13.96	13.96	48.5	sp|Q92752-2|TENR_HUMAN	Isoform 2 of Tenascin-R OS=Homo sapiens OX=9606 GN=TNR	HUMAN	17
277	13.86	13.86	56.9	sp|P40925|MDHC_HUMAN	Malate dehydrogenase, cytoplasmic OS=Homo sapiens OX=9606 GN=MDH1 PE=1 SV=4	HUMAN	12
278	13.7	15.87	44.5	sp|Q9BTY2|FUCO2_HUMAN	Plasma alpha-L-fucosidase OS=Homo sapiens OX=9606 GN=FUCA2 PE=1 SV=2	HUMAN	14
279	13.5	13.5	60.6	sp|Q96FE5-2|LIGO1_HUMAN	Isoform 2 of Leucine-rich repeat and immunoglobulin-like domain-containing nogo receptor-interacting protein 1 OS=Homo sapiens OX=9606 GN=LINGO1	HUMAN	9
280	13.26	15.36	55.3	sp|O75882-2|ATRN_HUMAN	Isoform 2 of Attractin OS=Homo sapiens OX=9606 GN=ATRN	HUMAN	13
281	13.25	17.06	55.4	tr|A0A087WW43|A0A087WW43_HUMAN	Inter-alpha-trypsin inhibitor heavy chain H3 OS=Homo sapiens OX=9606 GN=ITIH3 PE=1 SV=1	HUMAN	16
282	13.23	13.23	41.8	tr|E9PNQ8|E9PNQ8_HUMAN	Thy-1 membrane glycoprotein (Fragment) OS=Homo sapiens OX=9606 GN=THY1 PE=1 SV=1	HUMAN	20
283	13.2	13.2	56.7	sp|Q9UBQ6|EXTL2_HUMAN	Exostosin-like 2 OS=Homo sapiens OX=9606 GN=EXTL2 PE=1 SV=1	HUMAN	11
284	13.16	13.23	75.9	sp|P00746|CFAD_HUMAN	Complement factor D OS=Homo sapiens OX=9606 GN=CFD PE=1 SV=5	HUMAN	11
285	12.98	12.98	38.2	sp|Q16620-2|NTRK2_HUMAN	Isoform TrkB-T1 of BDNF/NT-3 growth factors receptor OS=Homo sapiens OX=9606 GN=NTRK2	HUMAN	10
286	12.89	26.73	72.1	sp|P19652|A1AG2_HUMAN	Alpha-1-acid glycoprotein 2 OS=Homo sapiens OX=9606 GN=ORM2 PE=1 SV=2	HUMAN	31
287	12.85	12.85	37.5	sp|Q99983|OMD_HUMAN	Osteomodulin OS=Homo sapiens OX=9606 GN=OMD PE=1 SV=1	HUMAN	11
288	12.84	12.84	52.9	sp|P48058-2|GRIA4_HUMAN	Isoform 2 of Glutamate receptor 4 OS=Homo sapiens OX=9606 GN=GRIA4	HUMAN	10
289	12.84	12.84	48.8	sp|Q9UBR2|CATZ_HUMAN	Cathepsin Z OS=Homo sapiens OX=9606 GN=CTSZ PE=1 SV=1	HUMAN	9
290	12.7	12.7	61.5	sp|P51888|PRELP_HUMAN	Prolargin OS=Homo sapiens OX=9606 GN=PRELP PE=1 SV=1	HUMAN	9
291	12.32	12.32	53.9	sp|P24043|LAMA2_HUMAN	Laminin subunit alpha-2 OS=Homo sapiens OX=9606 GN=LAMA2 PE=1 SV=4	HUMAN	13
292	12.12	12.12	56.6	sp|P14314-2|GLU2B_HUMAN	Isoform 2 of Glucosidase 2 subunit beta OS=Homo sapiens OX=9606 GN=PRKCSH	HUMAN	7
293	12	12	48.7	sp|Q16849|PTPRN_HUMAN	Receptor-type tyrosine-protein phosphatase-like N OS=Homo sapiens OX=9606 GN=PTPRN PE=1 SV=1	HUMAN	7
294	11.94	11.94	71.5	sp|P17900|SAP3_HUMAN	Ganglioside GM2 activator OS=Homo sapiens OX=9606 GN=GM2A PE=1 SV=4	HUMAN	24
295	11.81	13.82	90.4	tr|D6R934|D6R934_HUMAN	Complement C1q subcomponent subunit B OS=Homo sapiens OX=9606 GN=C1QB PE=1 SV=1	HUMAN	27
296	11.73	11.73	94.7	tr|A0A0U1RRH7|A0A0U1RRH7_HUMAN	Histone H2A OS=Homo sapiens OX=9606 PE=3 SV=1	HUMAN	8
297	11.72	11.72	63.1	tr|E9PR17|E9PR17_HUMAN	CD59 glycoprotein OS=Homo sapiens OX=9606 GN=CD59 PE=1 SV=1	HUMAN	11
298	11.65	11.65	46.6	sp|P22304|IDS_HUMAN	Iduronate 2-sulfatase OS=Homo sapiens OX=9606 GN=IDS PE=1 SV=1	HUMAN	7
299	11.53	12.86	41.2	sp|Q86UN3|R4RL2_HUMAN	Reticulon-4 receptor-like 2 OS=Homo sapiens OX=9606 GN=RTN4RL2 PE=1 SV=1	HUMAN	7
300	11.53	11.76	39.4	sp|O00462|MANBA_HUMAN	Beta-mannosidase OS=Homo sapiens OX=9606 GN=MANBA PE=2 SV=3	HUMAN	8
301	11.44	11.44	98.7	sp|P62979|RS27A_HUMAN	Ubiquitin-40S ribosomal protein S27a OS=Homo sapiens OX=9606 GN=RPS27A PE=1 SV=2	HUMAN	22
302	11.38	51.23	76.1	tr|A0A0G2JL69|A0A0G2JL69_HUMAN	Complement C2 OS=Homo sapiens OX=9606 GN=C2 PE=1 SV=1	HUMAN	57
303	11.38	11.38	52.2	tr|A0A0G2JHM8|A0A0G2JHM8_HUMAN	Myelin-oligodendrocyte glycoprotein OS=Homo sapiens OX=9606 GN=MOG PE=1 SV=1	HUMAN	10
304	11.35	11.35	63.6	sp|P04406|G3P_HUMAN	Glyceraldehyde-3-phosphate dehydrogenase OS=Homo sapiens OX=9606 GN=GAPDH PE=1 SV=3	HUMAN	8
305	11.19	13.28	80.8	sp|Q12841|FSTL1_HUMAN	Follistatin-related protein 1 OS=Homo sapiens OX=9606 GN=FSTL1 PE=1 SV=1	HUMAN	11
306	11.18	11.18	84.1	tr|A0A096LPE2|A0A096LPE2_HUMAN	SAA2-SAA4 readthrough OS=Homo sapiens OX=9606 GN=SAA2-SAA4 PE=4 SV=1	HUMAN	11
307	11.15	11.15	45.7	tr|H0Y2Q5|H0Y2Q5_HUMAN	Netrin receptor DCC (Fragment) OS=Homo sapiens OX=9606 GN=DCC PE=1 SV=2	HUMAN	6
308	11.11	11.11	41.6	tr|A0A0A0MQY7|A0A0A0MQY7_HUMAN	VWFA and cache domain-containing protein 1 OS=Homo sapiens OX=9606 GN=CACHD1 PE=1 SV=1	HUMAN	10
309	11.07	11.07	63.4	sp|Q96IY4|CBPB2_HUMAN	Carboxypeptidase B2 OS=Homo sapiens OX=9606 GN=CPB2 PE=1 SV=2	HUMAN	12
310	11.06	11.07	42.5	sp|Q8IV08|PLD3_HUMAN	Phospholipase D3 OS=Homo sapiens OX=9606 GN=PLD3 PE=1 SV=1	HUMAN	7
311	10.95	10.95	57.2	sp|Q13508-2|NAR3_HUMAN	Isoform 1 of Ecto-ADP-ribosyltransferase 3 OS=Homo sapiens OX=9606 GN=ART3	HUMAN	11
312	10.92	10.92	52.3	sp|P04179|SODM_HUMAN	Superoxide dismutase [Mn], mitochondrial OS=Homo sapiens OX=9606 GN=SOD2 PE=1 SV=3	HUMAN	7
313	10.89	10.89	60.8	sp|O94769-2|ECM2_HUMAN	Isoform 2 of Extracellular matrix protein 2 OS=Homo sapiens OX=9606 GN=ECM2	HUMAN	9
314	10.88	10.88	81.9	sp|P09211|GSTP1_HUMAN	Glutathione S-transferase P OS=Homo sapiens OX=9606 GN=GSTP1 PE=1 SV=2	HUMAN	8
315	10.79	10.79	46.6	sp|Q9H3G5|CPVL_HUMAN	Probable serine carboxypeptidase CPVL OS=Homo sapiens OX=9606 GN=CPVL PE=1 SV=2	HUMAN	10
316	10.75	10.75	90.4	tr|A6XND0|A6XND0_HUMAN	Insulin-like growth factor-binding protein 3 OS=Homo sapiens OX=9606 GN=IGFBP3 PE=1 SV=1	HUMAN	6
317	10.75	10.75	90.5	tr|S4R3C0|S4R3C0_HUMAN	Uncharacterized protein (Fragment) OS=Homo sapiens OX=9606 PE=4 SV=1	HUMAN	28
318	10.74	10.74	47.5	sp|Q9Y6N7-6|ROBO1_HUMAN	Isoform 6 of Roundabout homolog 1 OS=Homo sapiens OX=9606 GN=ROBO1	HUMAN	10
319	10.7	10.7	59.7	sp|Q9UGM5|FETUB_HUMAN	Fetuin-B OS=Homo sapiens OX=9606 GN=FETUB PE=1 SV=2	HUMAN	7
320	10.69	10.89	59.8	sp|Q86SF2|GALT7_HUMAN	N-acetylgalactosaminyltransferase 7 OS=Homo sapiens OX=9606 GN=GALNT7 PE=1 SV=1	HUMAN	11
321	10.67	10.67	50.8	sp|Q10471|GALT2_HUMAN	Polypeptide N-acetylgalactosaminyltransferase 2 OS=Homo sapiens OX=9606 GN=GALNT2 PE=1 SV=1	HUMAN	11
322	10.64	10.64	42.4	tr|D6RGZ6|D6RGZ6_HUMAN	Versican core protein (Fragment) OS=Homo sapiens OX=9606 GN=VCAN PE=1 SV=1	HUMAN	7
323	10.39	10.39	97.7	sp|P41271-2|NBL1_HUMAN	Isoform 2 of Neuroblastoma suppressor of tumorigenicity 1 OS=Homo sapiens OX=9606 GN=NBL1	HUMAN	11
324	10.26	10.26	56.1	sp|Q6UW01|CBLN3_HUMAN	Cerebellin-3 OS=Homo sapiens OX=9606 GN=CBLN3 PE=1 SV=1	HUMAN	6
325	10.21	10.21	55.9	sp|P16070-18|CD44_HUMAN	Isoform 18 of CD44 antigen OS=Homo sapiens OX=9606 GN=CD44	HUMAN	15
326	10.21	10.21	90.6	sp|P0DOY3|IGLC3_HUMAN	Immunoglobulin lambda constant 3 OS=Homo sapiens OX=9606 GN=IGLC3 PE=1 SV=1	HUMAN	8
327	10.2	10.2	50.7	tr|H7BY58|H7BY58_HUMAN	Protein-L-isoaspartate O-methyltransferase OS=Homo sapiens OX=9606 GN=PCMT1 PE=1 SV=1	HUMAN	6
328	10.18	10.18	67.4	sp|Q99674|CGRE1_HUMAN	Cell growth regulator with EF hand domain protein 1 OS=Homo sapiens OX=9606 GN=CGREF1 PE=2 SV=2	HUMAN	6
329	10.16	10.16	52.3	sp|Q14520-2|HABP2_HUMAN	Isoform 2 of Hyaluronan-binding protein 2 OS=Homo sapiens OX=9606 GN=HABP2	HUMAN	8
330	10.15	10.15	51.5	sp|Q16769|QPCT_HUMAN	Glutaminyl-peptide cyclotransferase OS=Homo sapiens OX=9606 GN=QPCT PE=1 SV=1	HUMAN	8
331	10.14	10.14	47.9	tr|E9PF59|E9PF59_HUMAN	Dipeptidyl aminopeptidase-like protein 6 OS=Homo sapiens OX=9606 GN=DPP6 PE=1 SV=1	HUMAN	7
332	10.13	10.14	65.7	sp|P30101|PDIA3_HUMAN	Protein disulfide-isomerase A3 OS=Homo sapiens OX=9606 GN=PDIA3 PE=1 SV=4	HUMAN	9
333	10.13	10.13	57	sp|Q9UHI8|ATS1_HUMAN	A disintegrin and metalloproteinase with thrombospondin motifs 1 OS=Homo sapiens OX=9606 GN=ADAMTS1 PE=1 SV=4	HUMAN	6
334	10.11	14.91	45.1	sp|Q14112|NID2_HUMAN	Nidogen-2 OS=Homo sapiens OX=9606 GN=NID2 PE=1 SV=3	HUMAN	17
335	10.1	10.96	93.3	sp|P62937|PPIA_HUMAN	Peptidyl-prolyl cis-trans isomerase A OS=Homo sapiens OX=9606 GN=PPIA PE=1 SV=2	HUMAN	13
336	10.1	10.1	80.8	sp|P32119|PRDX2_HUMAN	Peroxiredoxin-2 OS=Homo sapiens OX=9606 GN=PRDX2 PE=1 SV=5	HUMAN	7
337	10.07	10.07	70.7	sp|Q15782-5|CH3L2_HUMAN	Isoform 2 of Chitinase-3-like protein 2 OS=Homo sapiens OX=9606 GN=CHI3L2	HUMAN	6
338	10.02	10.02	41.2	sp|Q9UQ52|CNTN6_HUMAN	Contactin-6 OS=Homo sapiens OX=9606 GN=CNTN6 PE=1 SV=1	HUMAN	6
339	10.01	10.01	35.6	sp|Q08174|PCDH1_HUMAN	Protocadherin-1 OS=Homo sapiens OX=9606 GN=PCDH1 PE=1 SV=2	HUMAN	5
340	10	263.35	79.5	tr|A0A087WT59|A0A087WT59_HUMAN	Transthyretin OS=Homo sapiens OX=9606 GN=TTR PE=1 SV=1	HUMAN	782
341	10	10	83.6	sp|P09417-2|DHPR_HUMAN	Isoform 2 of Dihydropteridine reductase OS=Homo sapiens OX=9606 GN=QDPR	HUMAN	6
342	9.88	9.88	51.1	sp|P09603|CSF1_HUMAN	Macrophage colony-stimulating factor 1 OS=Homo sapiens OX=9606 GN=CSF1 PE=1 SV=2	HUMAN	8
343	9.85	9.85	59.1	sp|P13473-3|LAMP2_HUMAN	Isoform LAMP-2C of Lysosome-associated membrane glycoprotein 2 OS=Homo sapiens OX=9606 GN=LAMP2	HUMAN	8
344	9.83	9.83	54.1	sp|P48745|NOV_HUMAN	Protein NOV homolog OS=Homo sapiens OX=9606 GN=NOV PE=1 SV=1	HUMAN	12
345	9.75	9.75	50.7	sp|P37837|TALDO_HUMAN	Transaldolase OS=Homo sapiens OX=9606 GN=TALDO1 PE=1 SV=2	HUMAN	5
346	9.69	9.8	95	sp|P55083-2|MFAP4_HUMAN	Isoform 2 of Microfibril-associated glycoprotein 4 OS=Homo sapiens OX=9606 GN=MFAP4	HUMAN	11
347	9.68	9.68	67.9	sp|O14791-3|APOL1_HUMAN	Isoform 3 of Apolipoprotein L1 OS=Homo sapiens OX=9606 GN=APOL1	HUMAN	6
348	9.68	9.68	36.2	tr|H0YNK6|H0YNK6_HUMAN	Tyrosine-protein kinase receptor TYRO3 OS=Homo sapiens OX=9606 GN=TYRO3 PE=1 SV=1	HUMAN	6
349	9.62	9.62	67.5	sp|Q6NW40|RGMB_HUMAN	RGM domain family member B OS=Homo sapiens OX=9606 GN=RGMB PE=1 SV=3	HUMAN	8
350	9.62	9.62	49.5	sp|Q9UJJ9|GNPTG_HUMAN	N-acetylglucosamine-1-phosphotransferase subunit gamma OS=Homo sapiens OX=9606 GN=GNPTG PE=1 SV=1	HUMAN	5
351	9.4	9.4	76.3	sp|P26038|MOES_HUMAN	Moesin OS=Homo sapiens OX=9606 GN=MSN PE=1 SV=3	HUMAN	9
352	9.39	9.39	29.8	sp|Q9NZ53|PDXL2_HUMAN	Podocalyxin-like protein 2 OS=Homo sapiens OX=9606 GN=PODXL2 PE=1 SV=1	HUMAN	9
353	9.27	9.27	64.7	tr|E7ETZ0|E7ETZ0_HUMAN	Calmodulin-1 OS=Homo sapiens OX=9606 GN=CALM1 PE=1 SV=1	HUMAN	7
354	9.24	9.24	48.7	sp|Q8NFY4-8|SEM6D_HUMAN	Isoform 8 of Semaphorin-6D OS=Homo sapiens OX=9606 GN=SEMA6D	HUMAN	6
355	9.21	9.21	62.8	sp|P04003|C4BPA_HUMAN	C4b-binding protein alpha chain OS=Homo sapiens OX=9606 GN=C4BPA PE=1 SV=2	HUMAN	8
356	9.17	11.22	73.8	sp|P27824-3|CALX_HUMAN	Isoform 3 of Calnexin OS=Homo sapiens OX=9606 GN=CANX	HUMAN	7
357	9.1	9.1	51.2	sp|Q9UBX1|CATF_HUMAN	Cathepsin F OS=Homo sapiens OX=9606 GN=CTSF PE=1 SV=1	HUMAN	7
358	9.08	9.08	39.5	sp|Q9UMF0|ICAM5_HUMAN	Intercellular adhesion molecule 5 OS=Homo sapiens OX=9606 GN=ICAM5 PE=1 SV=3	HUMAN	7
359	8.88	8.88	50	tr|A0A087X054|A0A087X054_HUMAN	Hypoxia up-regulated protein 1 OS=Homo sapiens OX=9606 GN=HYOU1 PE=1 SV=1	HUMAN	6
360	8.86	8.86	48	sp|Q96ID5|IGS21_HUMAN	Immunoglobulin superfamily member 21 OS=Homo sapiens OX=9606 GN=IGSF21 PE=2 SV=1	HUMAN	6
361	8.76	141.98	83.1	tr|H0Y7Z1|H0Y7Z1_HUMAN	Fibronectin (Fragment) OS=Homo sapiens OX=9606 GN=FN1 PE=1 SV=1	HUMAN	164
362	8.75	8.75	99.1	sp|P20472|PRVA_HUMAN	Parvalbumin alpha OS=Homo sapiens OX=9606 GN=PVALB PE=1 SV=2	HUMAN	10
363	8.71	8.71	51.8	sp|P30530-2|UFO_HUMAN	Isoform Short of Tyrosine-protein kinase receptor UFO OS=Homo sapiens OX=9606 GN=AXL	HUMAN	10
364	8.7	8.7	37.7	sp|P02743|SAMP_HUMAN	Serum amyloid P-component OS=Homo sapiens OX=9606 GN=APCS PE=1 SV=2	HUMAN	9
365	8.56	8.56	47.5	sp|O94910-2|AGRL1_HUMAN	Isoform 2 of Adhesion G protein-coupled receptor L1 OS=Homo sapiens OX=9606 GN=ADGRL1	HUMAN	12
366	8.42	8.42	47.8	sp|Q9UHL4|DPP2_HUMAN	Dipeptidyl peptidase 2 OS=Homo sapiens OX=9606 GN=DPP7 PE=1 SV=3	HUMAN	5
367	8.41	8.67	51.5	sp|P48740-4|MASP1_HUMAN	Isoform 4 of Mannan-binding lectin serine protease 1 OS=Homo sapiens OX=9606 GN=MASP1	HUMAN	8
368	8.4	8.4	70.9	sp|P13645|K1C10_HUMAN	Keratin, type I cytoskeletal 10 OS=Homo sapiens OX=9606 GN=KRT10 PE=1 SV=6	HUMAN	6
369	8.39	8.39	63.7	tr|F8WE86|F8WE86_HUMAN	Transcobalamin-2 OS=Homo sapiens OX=9606 GN=TCN2 PE=1 SV=2	HUMAN	9
370	8.37	8.37	76.9	sp|Q01459|DIAC_HUMAN	Di-N-acetylchitobiase OS=Homo sapiens OX=9606 GN=CTBS PE=1 SV=1	HUMAN	8
371	8.19	8.19	36.2	tr|A0A087X0D5|A0A087X0D5_HUMAN	Pro-cathepsin H OS=Homo sapiens OX=9606 GN=CTSH PE=1 SV=1	HUMAN	5
372	8.12	18.41	69.6	sp|P06733|ENOA_HUMAN	Alpha-enolase OS=Homo sapiens OX=9606 GN=ENO1 PE=1 SV=2	HUMAN	11
373	8.11	8.11	51.1	sp|P18428|LBP_HUMAN	Lipopolysaccharide-binding protein OS=Homo sapiens OX=9606 GN=LBP PE=1 SV=3	HUMAN	6
374	8.1	8.1	52.2	sp|P08195-2|4F2_HUMAN	Isoform 2 of 4F2 cell-surface antigen heavy chain OS=Homo sapiens OX=9606 GN=SLC3A2	HUMAN	6
375	8.08	8.08	67.8	sp|P47972|NPTX2_HUMAN	Neuronal pentraxin-2 OS=Homo sapiens OX=9606 GN=NPTX2 PE=1 SV=2	HUMAN	6
376	8.06	8.06	64.7	sp|P01619|KV320_HUMAN	Immunoglobulin kappa variable 3-20 OS=Homo sapiens OX=9606 GN=IGKV3-20 PE=1 SV=2	HUMAN	10
377	8.05	8.05	62.6	sp|Q86UD1|OAF_HUMAN	Out at first protein homolog OS=Homo sapiens OX=9606 GN=OAF PE=2 SV=1	HUMAN	4
378	8.04	8.04	51	sp|O43556|SGCE_HUMAN	Epsilon-sarcoglycan OS=Homo sapiens OX=9606 GN=SGCE PE=1 SV=6	HUMAN	5
379	8	119.09	94	tr|J3KRP0|J3KRP0_HUMAN	Beta-Ala-His dipeptidase OS=Homo sapiens OX=9606 GN=CNDP1 PE=1 SV=2	HUMAN	265
380	8	8	49.7	sp|Q96KG7|MEG10_HUMAN	Multiple epidermal growth factor-like domains protein 10 OS=Homo sapiens OX=9606 GN=MEGF10 PE=1 SV=1	HUMAN	4
381	8	8	52.6	tr|J3QRT5|J3QRT5_HUMAN	Intercellular adhesion molecule 2 OS=Homo sapiens OX=9606 GN=ICAM2 PE=1 SV=1	HUMAN	4
382	7.95	7.95	36.3	sp|Q8N2Q7-2|NLGN1_HUMAN	Isoform 2 of Neuroligin-1 OS=Homo sapiens OX=9606 GN=NLGN1	HUMAN	6
383	7.89	7.89	89.9	sp|P80723|BASP1_HUMAN	Brain acid soluble protein 1 OS=Homo sapiens OX=9606 GN=BASP1 PE=1 SV=2	HUMAN	4
384	7.71	7.71	94.3	sp|P10599|THIO_HUMAN	Thioredoxin OS=Homo sapiens OX=9606 GN=TXN PE=1 SV=3	HUMAN	7
385	7.71	7.71	29.7	sp|Q92485|ASM3B_HUMAN	Acid sphingomyelinase-like phosphodiesterase 3b OS=Homo sapiens OX=9606 GN=SMPDL3B PE=1 SV=2	HUMAN	4
386	7.65	7.65	57.5	sp|O95445|APOM_HUMAN	Apolipoprotein M OS=Homo sapiens OX=9606 GN=APOM PE=1 SV=2	HUMAN	4
387	7.63	7.63	63.2	sp|Q8NCW5|NNRE_HUMAN	NAD(P)H-hydrate epimerase OS=Homo sapiens OX=9606 GN=NAXE PE=1 SV=2	HUMAN	5
388	7.62	65.27	84.6	sp|P01860|IGHG3_HUMAN	Immunoglobulin heavy constant gamma 3 OS=Homo sapiens OX=9606 GN=IGHG3 PE=1 SV=2	HUMAN	87
389	7.61	7.61	46.9	sp|Q99784-5|NOE1_HUMAN	Isoform 5 of Noelin OS=Homo sapiens OX=9606 GN=OLFM1	HUMAN	5
390	7.57	7.57	74.5	sp|P31150|GDIA_HUMAN	Rab GDP dissociation inhibitor alpha OS=Homo sapiens OX=9606 GN=GDI1 PE=1 SV=2	HUMAN	4
391	7.55	7.55	48.5	sp|Q8IUX7|AEBP1_HUMAN	Adipocyte enhancer-binding protein 1 OS=Homo sapiens OX=9606 GN=AEBP1 PE=1 SV=1	HUMAN	7
392	7.55	7.55	42.9	tr|D6RF86|D6RF86_HUMAN	Cadherin-6 OS=Homo sapiens OX=9606 GN=CDH6 PE=1 SV=1	HUMAN	5
393	7.42	7.42	46.4	sp|Q9UBX5|FBLN5_HUMAN	Fibulin-5 OS=Homo sapiens OX=9606 GN=FBLN5 PE=1 SV=1	HUMAN	5
394	7.4	7.4	36.2	tr|H0YMZ3|H0YMZ3_HUMAN	Semaphorin-4B (Fragment) OS=Homo sapiens OX=9606 GN=SEMA4B PE=1 SV=1	HUMAN	7
395	7.39	7.39	52.5	sp|O15031|PLXB2_HUMAN	Plexin-B2 OS=Homo sapiens OX=9606 GN=PLXNB2 PE=1 SV=3	HUMAN	9
396	7.26	7.27	36.5	sp|Q9BQT9|CSTN3_HUMAN	Calsyntenin-3 OS=Homo sapiens OX=9606 GN=CLSTN3 PE=1 SV=1	HUMAN	7
397	7.26	7.26	55	sp|Q9Y5Y7|LYVE1_HUMAN	Lymphatic vessel endothelial hyaluronic acid receptor 1 OS=Homo sapiens OX=9606 GN=LYVE1 PE=1 SV=2	HUMAN	9
398	7.23	7.23	58.4	tr|E9PND1|E9PND1_HUMAN	Adhesion G protein-coupled receptor B2 (Fragment) OS=Homo sapiens OX=9606 GN=ADGRB2 PE=1 SV=1	HUMAN	5
399	7.16	7.16	50.6	sp|P01871|IGHM_HUMAN	Immunoglobulin heavy constant mu OS=Homo sapiens OX=9606 GN=IGHM PE=1 SV=4	HUMAN	6
400	7.09	8.87	42.5	sp|P04066|FUCO_HUMAN	Tissue alpha-L-fucosidase OS=Homo sapiens OX=9606 GN=FUCA1 PE=1 SV=4	HUMAN	7
401	7.09	7.09	52.5	sp|Q9UQM7|KCC2A_HUMAN	Calcium/calmodulin-dependent protein kinase type II subunit alpha OS=Homo sapiens OX=9606 GN=CAMK2A PE=1 SV=2	HUMAN	6
402	7.05	7.05	55.3	sp|P55268|LAMB2_HUMAN	Laminin subunit beta-2 OS=Homo sapiens OX=9606 GN=LAMB2 PE=1 SV=2	HUMAN	8
403	7.02	7.02	44.9	sp|P07942|LAMB1_HUMAN	Laminin subunit beta-1 OS=Homo sapiens OX=9606 GN=LAMB1 PE=1 SV=2	HUMAN	8
404	7	7.69	29.4	sp|P22792|CPN2_HUMAN	Carboxypeptidase N subunit 2 OS=Homo sapiens OX=9606 GN=CPN2 PE=1 SV=3	HUMAN	8
405	6.97	6.97	52.8	sp|O94772-2|LY6H_HUMAN	Isoform 2 of Lymphocyte antigen 6H OS=Homo sapiens OX=9606 GN=LY6H	HUMAN	9
406	6.94	6.94	70.8	sp|P02144|MYG_HUMAN	Myoglobin OS=Homo sapiens OX=9606 GN=MB PE=1 SV=2	HUMAN	5
407	6.91	6.91	21.4	sp|O60883|ETBR2_HUMAN	Prosaposin receptor GPR37L1 OS=Homo sapiens OX=9606 GN=GPR37L1 PE=1 SV=2	HUMAN	10
408	6.88	6.88	53.3	sp|P22897|MRC1_HUMAN	Macrophage mannose receptor 1 OS=Homo sapiens OX=9606 GN=MRC1 PE=1 SV=1	HUMAN	5
409	6.85	6.85	61.8	sp|P18669|PGAM1_HUMAN	Phosphoglycerate mutase 1 OS=Homo sapiens OX=9606 GN=PGAM1 PE=1 SV=2	HUMAN	5
410	6.85	6.85	55.8	tr|K7ERI9|K7ERI9_HUMAN	Apolipoprotein C-I (Fragment) OS=Homo sapiens OX=9606 GN=APOC1 PE=1 SV=1	HUMAN	6
411	6.84	6.84	67.4	sp|P05937|CALB1_HUMAN	Calbindin OS=Homo sapiens OX=9606 GN=CALB1 PE=1 SV=2	HUMAN	5
412	6.84	6.84	43.7	tr|A0A140T9W2|A0A140T9W2_HUMAN	HLA class I histocompatibility antigen, Cw-6 alpha chain OS=Homo sapiens OX=9606 GN=HLA-C PE=1 SV=1	HUMAN	5
413	6.81	6.81	52.4	sp|Q9Y2T3|GUAD_HUMAN	Guanine deaminase OS=Homo sapiens OX=9606 GN=GDA PE=1 SV=1	HUMAN	6
414	6.78	6.78	50.4	sp|P24593|IBP5_HUMAN	Insulin-like growth factor-binding protein 5 OS=Homo sapiens OX=9606 GN=IGFBP5 PE=1 SV=1	HUMAN	5
415	6.72	6.72	51.4	sp|Q8IZP7|H6ST3_HUMAN	Heparan-sulfate 6-O-sulfotransferase 3 OS=Homo sapiens OX=9606 GN=HS6ST3 PE=2 SV=3	HUMAN	6
416	6.6	6.6	50.6	sp|Q9Y2I2-2|NTNG1_HUMAN	Isoform 2 of Netrin-G1 OS=Homo sapiens OX=9606 GN=NTNG1	HUMAN	6
417	6.48	6.53	41	sp|P01601|KVD16_HUMAN	Immunoglobulin kappa variable 1D-16 OS=Homo sapiens OX=9606 GN=IGKV1D-16 PE=3 SV=2	HUMAN	9
418	6.48	6.48	89	sp|Q99969|RARR2_HUMAN	Retinoic acid receptor responder protein 2 OS=Homo sapiens OX=9606 GN=RARRES2 PE=1 SV=1	HUMAN	11
419	6.47	6.47	36.9	sp|P80108|PHLD_HUMAN	Phosphatidylinositol-glycan-specific phospholipase D OS=Homo sapiens OX=9606 GN=GPLD1 PE=1 SV=3	HUMAN	7
420	6.46	6.46	63.2	sp|Q9Y287|ITM2B_HUMAN	Integral membrane protein 2B OS=Homo sapiens OX=9606 GN=ITM2B PE=1 SV=1	HUMAN	4
421	6.44	6.44	90.2	sp|P17677-2|NEUM_HUMAN	Isoform 2 of Neuromodulin OS=Homo sapiens OX=9606 GN=GAP43	HUMAN	4
422	6.44	6.44	89.8	sp|O75711|SCRG1_HUMAN	Scrapie-responsive protein 1 OS=Homo sapiens OX=9606 GN=SCRG1 PE=1 SV=1	HUMAN	7
423	6.38	6.38	45.5	sp|O75509|TNR21_HUMAN	Tumor necrosis factor receptor superfamily member 21 OS=Homo sapiens OX=9606 GN=TNFRSF21 PE=1 SV=1	HUMAN	5
424	6.36	6.36	43	sp|Q5FWE3-3|PRRT3_HUMAN	Isoform 3 of Proline-rich transmembrane protein 3 OS=Homo sapiens OX=9606 GN=PRRT3	HUMAN	4
425	6.36	6.36	65.3	sp|P23435|CBLN1_HUMAN	Cerebellin-1 OS=Homo sapiens OX=9606 GN=CBLN1 PE=1 SV=1	HUMAN	8
426	6.32	6.32	25	sp|Q15223-3|NECT1_HUMAN	Isoform Gamma of Nectin-1 OS=Homo sapiens OX=9606 GN=NECTIN1	HUMAN	4
427	6.29	6.29	45	sp|P54802|ANAG_HUMAN	Alpha-N-acetylglucosaminidase OS=Homo sapiens OX=9606 GN=NAGLU PE=1 SV=2	HUMAN	4
428	6.25	6.25	53.5	sp|P11047|LAMC1_HUMAN	Laminin subunit gamma-1 OS=Homo sapiens OX=9606 GN=LAMC1 PE=1 SV=3	HUMAN	9
429	6.25	6.25	76.3	sp|Q8TAG5|VTM2A_HUMAN	V-set and transmembrane domain-containing protein 2A OS=Homo sapiens OX=9606 GN=VSTM2A PE=1 SV=3	HUMAN	4
430	6.24	6.24	84	sp|P07998|RNAS1_HUMAN	Ribonuclease pancreatic OS=Homo sapiens OX=9606 GN=RNASE1 PE=1 SV=4	HUMAN	36
431	6.16	6.16	68.7	sp|P34096|RNAS4_HUMAN	Ribonuclease 4 OS=Homo sapiens OX=9606 GN=RNASE4 PE=1 SV=3	HUMAN	5
432	6.14	6.14	80.7	tr|U3KQK0|U3KQK0_HUMAN	Histone H2B OS=Homo sapiens OX=9606 GN=HIST1H2BN PE=1 SV=1	HUMAN	4
433	6.13	6.13	35.8	sp|P21802-19|FGFR2_HUMAN	Isoform 19 of Fibroblast growth factor receptor 2 OS=Homo sapiens OX=9606 GN=FGFR2	HUMAN	5
434	6.12	6.12	56.5	sp|P03950|ANGI_HUMAN	Angiogenin OS=Homo sapiens OX=9606 GN=ANG PE=1 SV=1	HUMAN	3
435	6.1	6.1	75.5	sp|Q9UK55|ZPI_HUMAN	Protein Z-dependent protease inhibitor OS=Homo sapiens OX=9606 GN=SERPINA10 PE=1 SV=1	HUMAN	5
436	6.03	56.69	100	sp|P02042|HBD_HUMAN	Hemoglobin subunit delta OS=Homo sapiens OX=9606 GN=HBD PE=1 SV=2	HUMAN	71
437	6.03	6.03	77	sp|O43493|TGON2_HUMAN	Trans-Golgi network integral membrane protein 2 OS=Homo sapiens OX=9606 GN=TGOLN2 PE=1 SV=3	HUMAN	4
438	6.03	6.03	46.5	sp|Q6FHJ7|SFRP4_HUMAN	Secreted frizzled-related protein 4 OS=Homo sapiens OX=9606 GN=SFRP4 PE=1 SV=2	HUMAN	4
439	6.02	8.02	79.4	sp|Q9BQ16-2|TICN3_HUMAN	Isoform 2 of Testican-3 OS=Homo sapiens OX=9606 GN=SPOCK3	HUMAN	6
440	6.01	69.46	93.6	sp|P01861|IGHG4_HUMAN	Immunoglobulin heavy constant gamma 4 OS=Homo sapiens OX=9606 GN=IGHG4 PE=1 SV=1	HUMAN	104
441	6.01	6.07	55.9	tr|A0A1B0GVW0|A0A1B0GVW0_HUMAN	Renin receptor OS=Homo sapiens OX=9606 GN=ATP6AP2 PE=1 SV=1	HUMAN	4
442	6.01	6.01	79.9	sp|Q5BLP8-2|CD048_HUMAN	Isoform 2 of Neuropeptide-like protein C4orf48 OS=Homo sapiens OX=9606 GN=C4orf48	HUMAN	4
443	6.01	6.01	46.1	sp|Q9BRK5|CAB45_HUMAN	45 kDa calcium-binding protein OS=Homo sapiens OX=9606 GN=SDF4 PE=1 SV=1	HUMAN	3
444	6.01	6.01	31.2	sp|P14151|LYAM1_HUMAN	L-selectin OS=Homo sapiens OX=9606 GN=SELL PE=1 SV=2	HUMAN	3
445	6	6	39.5	sp|Q9UNN8|EPCR_HUMAN	Endothelial protein C receptor OS=Homo sapiens OX=9606 GN=PROCR PE=1 SV=1	HUMAN	3
446	5.95	10.06	64.8	sp|P00338|LDHA_HUMAN	L-lactate dehydrogenase A chain OS=Homo sapiens OX=9606 GN=LDHA PE=1 SV=2	HUMAN	11
447	5.9	5.9	51.2	tr|A0A087X1P2|A0A087X1P2_HUMAN	Protocadherin gamma-C3 (Fragment) OS=Homo sapiens OX=9606 GN=PCDHGC3 PE=1 SV=1	HUMAN	3
448	5.83	5.83	64.7	tr|H9KV75|H9KV75_HUMAN	Alpha-actinin-1 OS=Homo sapiens OX=9606 GN=ACTN1 PE=1 SV=1	HUMAN	5
449	5.8	19.82	83.6	sp|Q03591|FHR1_HUMAN	Complement factor H-related protein 1 OS=Homo sapiens OX=9606 GN=CFHR1 PE=1 SV=2	HUMAN	20
450	5.71	7.77	57.9	sp|Q92932-2|PTPR2_HUMAN	Isoform 2 of Receptor-type tyrosine-protein phosphatase N2 OS=Homo sapiens OX=9606 GN=PTPRN2	HUMAN	6
451	5.71	5.71	46.6	sp|Q92673|SORL_HUMAN	Sortilin-related receptor OS=Homo sapiens OX=9606 GN=SORL1 PE=1 SV=2	HUMAN	9
452	5.69	5.69	47.8	sp|P08174-5|DAF_HUMAN	Isoform 5 of Complement decay-accelerating factor OS=Homo sapiens OX=9606 GN=CD55	HUMAN	6
453	5.68	5.68	76.3	sp|O75368|SH3L1_HUMAN	SH3 domain-binding glutamic acid-rich-like protein OS=Homo sapiens OX=9606 GN=SH3BGRL PE=1 SV=1	HUMAN	3
454	5.67	5.67	59	sp|P00742|FA10_HUMAN	Coagulation factor X OS=Homo sapiens OX=9606 GN=F10 PE=1 SV=2	HUMAN	6
455	5.65	7.85	45.9	sp|P10586-2|PTPRF_HUMAN	Isoform 2 of Receptor-type tyrosine-protein phosphatase F OS=Homo sapiens OX=9606 GN=PTPRF	HUMAN	10
456	5.55	5.55	41.7	sp|Q9Y279-2|VSIG4_HUMAN	Isoform 2 of V-set and immunoglobulin domain-containing protein 4 OS=Homo sapiens OX=9606 GN=VSIG4	HUMAN	3
457	5.54	5.54	68.8	sp|Q14165|MLEC_HUMAN	Malectin OS=Homo sapiens OX=9606 GN=MLEC PE=1 SV=1	HUMAN	3
458	5.49	5.5	71.6	sp|Q9UBX7|KLK11_HUMAN	Kallikrein-11 OS=Homo sapiens OX=9606 GN=KLK11 PE=1 SV=2	HUMAN	7
459	5.45	5.46	59.4	sp|Q92563|TICN2_HUMAN	Testican-2 OS=Homo sapiens OX=9606 GN=SPOCK2 PE=1 SV=1	HUMAN	6
460	5.43	5.43	60	sp|Q93091|RNAS6_HUMAN	Ribonuclease K6 OS=Homo sapiens OX=9606 GN=RNASE6 PE=1 SV=2	HUMAN	6
461	5.39	5.39	49.7	tr|M0R192|M0R192_HUMAN	Flavin reductase (NADPH) OS=Homo sapiens OX=9606 GN=BLVRB PE=1 SV=1	HUMAN	3
462	5.37	7.42	47.9	sp|Q04756|HGFA_HUMAN	Hepatocyte growth factor activator OS=Homo sapiens OX=9606 GN=HGFAC PE=1 SV=1	HUMAN	5
463	5.27	5.27	30.2	sp|Q14126|DSG2_HUMAN	Desmoglein-2 OS=Homo sapiens OX=9606 GN=DSG2 PE=1 SV=2	HUMAN	4
464	5.22	5.22	57.8	sp|O15354|GPR37_HUMAN	Prosaposin receptor GPR37 OS=Homo sapiens OX=9606 GN=GPR37 PE=1 SV=2	HUMAN	7
465	5.22	5.22	46.4	sp|P22303|ACES_HUMAN	Acetylcholinesterase OS=Homo sapiens OX=9606 GN=ACHE PE=1 SV=1	HUMAN	4
466	5.21	5.21	83.7	tr|A0A1B0GTP7|A0A1B0GTP7_HUMAN	Acid ceramidase OS=Homo sapiens OX=9606 GN=ASAH1 PE=1 SV=1	HUMAN	5
467	5.17	5.17	84.5	sp|P62805|H4_HUMAN	Histone H4 OS=Homo sapiens OX=9606 GN=HIST1H4A PE=1 SV=2	HUMAN	3
468	4.88	4.88	39.7	sp|P04040|CATA_HUMAN	Catalase OS=Homo sapiens OX=9606 GN=CAT PE=1 SV=3	HUMAN	4
469	4.79	4.79	65.1	sp|Q99497|PARK7_HUMAN	Protein/nucleic acid deglycase DJ-1 OS=Homo sapiens OX=9606 GN=PARK7 PE=1 SV=2	HUMAN	4
470	4.74	4.74	47.4	sp|Q9Y240|CLC11_HUMAN	C-type lectin domain family 11 member A OS=Homo sapiens OX=9606 GN=CLEC11A PE=1 SV=1	HUMAN	4
471	4.68	4.68	32.6	sp|Q99523|SORT_HUMAN	Sortilin OS=Homo sapiens OX=9606 GN=SORT1 PE=1 SV=3	HUMAN	3
472	4.64	5.58	48.7	sp|Q9UNW1|MINP1_HUMAN	Multiple inositol polyphosphate phosphatase 1 OS=Homo sapiens OX=9606 GN=MINPP1 PE=1 SV=1	HUMAN	5
473	4.64	4.64	38.4	sp|Q8IZS8|CA2D3_HUMAN	Voltage-dependent calcium channel subunit alpha-2/delta-3 OS=Homo sapiens OX=9606 GN=CACNA2D3 PE=1 SV=1	HUMAN	4
474	4.62	4.62	58.8	sp|Q92743|HTRA1_HUMAN	Serine protease HTRA1 OS=Homo sapiens OX=9606 GN=HTRA1 PE=1 SV=1	HUMAN	3
475	4.58	4.58	33.5	sp|P55283|CADH4_HUMAN	Cadherin-4 OS=Homo sapiens OX=9606 GN=CDH4 PE=2 SV=2	HUMAN	6
476	4.49	4.49	44.4	sp|P09382|LEG1_HUMAN	Galectin-1 OS=Homo sapiens OX=9606 GN=LGALS1 PE=1 SV=2	HUMAN	3
477	4.46	4.46	43.3	tr|K7EKA8|K7EKA8_HUMAN	Disintegrin and metalloproteinase domain-containing protein 11 (Fragment) OS=Homo sapiens OX=9606 GN=ADAM11 PE=1 SV=1	HUMAN	3
478	4.43	4.43	84.5	sp|P61626|LYSC_HUMAN	Lysozyme C OS=Homo sapiens OX=9606 GN=LYZ PE=1 SV=1	HUMAN	7
479	4.41	4.41	55.9	sp|Q5KU26|COL12_HUMAN	Collectin-12 OS=Homo sapiens OX=9606 GN=COLEC12 PE=1 SV=3	HUMAN	5
480	4.41	4.41	43.4	tr|H3BUU9|H3BUU9_HUMAN	Cadherin-11 OS=Homo sapiens OX=9606 GN=CDH11 PE=1 SV=1	HUMAN	3
481	4.41	4.41	62	sp|Q15084-3|PDIA6_HUMAN	Isoform 3 of Protein disulfide-isomerase A6 OS=Homo sapiens OX=9606 GN=PDIA6	HUMAN	4
482	4.37	4.37	63.7	tr|A0A087X1R2|A0A087X1R2_HUMAN	Osteoclast-associated immunoglobulin-like receptor OS=Homo sapiens OX=9606 GN=OSCAR PE=1 SV=1	HUMAN	4
483	4.34	4.34	37.8	tr|H0Y755|H0Y755_HUMAN	Low affinity immunoglobulin gamma Fc region receptor III-A (Fragment) OS=Homo sapiens OX=9606 GN=FCGR3A PE=1 SV=2	HUMAN	5
484	4.32	4.32	38	sp|Q8N2S1-2|LTBP4_HUMAN	Isoform 2 of Latent-transforming growth factor beta-binding protein 4 OS=Homo sapiens OX=9606 GN=LTBP4	HUMAN	5
485	4.24	4.24	35.2	tr|A0A1B0GWI2|A0A1B0GWI2_HUMAN	Ceroid-lipofuscinosis neuronal protein 5 (Fragment) OS=Homo sapiens OX=9606 GN=CLN5 PE=1 SV=1	HUMAN	5
486	4.2	4.2	70.8	tr|E9PGA6|E9PGA6_HUMAN	C1QTNF3-AMACR readthrough (NMD candidate) OS=Homo sapiens OX=9606 GN=C1QTNF3-AMACR PE=4 SV=1	HUMAN	2
487	4.2	4.2	61.2	sp|Q9NQX5|NPDC1_HUMAN	Neural proliferation differentiation and control protein 1 OS=Homo sapiens OX=9606 GN=NPDC1 PE=1 SV=2	HUMAN	4
488	4.17	4.39	73.5	sp|P01602|KV105_HUMAN	Immunoglobulin kappa variable 1-5 OS=Homo sapiens OX=9606 GN=IGKV1-5 PE=1 SV=2	HUMAN	6
489	4.16	4.16	43.1	sp|P35442|TSP2_HUMAN	Thrombospondin-2 OS=Homo sapiens OX=9606 GN=THBS2 PE=1 SV=2	HUMAN	5
490	4.16	4.16	88.9	tr|B0YIW2|B0YIW2_HUMAN	Apolipoprotein C-III OS=Homo sapiens OX=9606 GN=APOC3 PE=1 SV=1	HUMAN	3
491	4.16	4.16	39.4	sp|O75144|ICOSL_HUMAN	ICOS ligand OS=Homo sapiens OX=9606 GN=ICOSLG PE=1 SV=2	HUMAN	5
492	4.14	4.14	48.8	tr|H3BMA1|H3BMA1_HUMAN	Mesothelin (Fragment) OS=Homo sapiens OX=9606 GN=MSLN PE=1 SV=2	HUMAN	3
493	4.13	4.13	41.5	sp|Q6UXK2|ISLR2_HUMAN	Immunoglobulin superfamily containing leucine-rich repeat protein 2 OS=Homo sapiens OX=9606 GN=ISLR2 PE=2 SV=1	HUMAN	4
494	4.13	4.13	51.2	sp|P20933|ASPG_HUMAN	N(4)-(beta-N-acetylglucosaminyl)-L-asparaginase OS=Homo sapiens OX=9606 GN=AGA PE=1 SV=2	HUMAN	3
495	4.13	4.13	46.2	tr|A0A0C4DFZ2|A0A0C4DFZ2_HUMAN	Arylsulfatase A OS=Homo sapiens OX=9606 GN=ARSA PE=1 SV=1	HUMAN	3
496	4.13	4.13	39.3	tr|F5H7G2|F5H7G2_HUMAN	Repulsive guidance molecule A OS=Homo sapiens OX=9606 GN=RGMA PE=1 SV=2	HUMAN	2
497	4.12	4.12	60.6	sp|P35613-2|BASI_HUMAN	Isoform 2 of Basigin OS=Homo sapiens OX=9606 GN=BSG	HUMAN	3
498	4.12	4.12	38.5	sp|P22748|CAH4_HUMAN	Carbonic anhydrase 4 OS=Homo sapiens OX=9606 GN=CA4 PE=1 SV=2	HUMAN	4
499	4.11	4.46	68.5	tr|B0YJC4|B0YJC4_HUMAN	Vimentin OS=Homo sapiens OX=9606 GN=VIM PE=1 SV=1	HUMAN	4
500	4.11	4.11	67.9	tr|A0A140T8W3|A0A140T8W3_HUMAN	Leukocyte-associated immunoglobulin-like receptor 1 OS=Homo sapiens OX=9606 GN=LAIR1 PE=1 SV=1	HUMAN	2
501	4.1	4.1	43.2	sp|P01127|PDGFB_HUMAN	Platelet-derived growth factor subunit B OS=Homo sapiens OX=9606 GN=PDGFB PE=1 SV=1	HUMAN	3
502	4.09	4.09	65.5	sp|O00461|GOLI4_HUMAN	Golgi integral membrane protein 4 OS=Homo sapiens OX=9606 GN=GOLIM4 PE=1 SV=1	HUMAN	3
503	4.08	4.08	60.8	sp|P29966|MARCS_HUMAN	Myristoylated alanine-rich C-kinase substrate OS=Homo sapiens OX=9606 GN=MARCKS PE=1 SV=4	HUMAN	2
504	4.04	4.05	89.8	tr|F5H7S3|F5H7S3_HUMAN	Tropomyosin alpha-1 chain OS=Homo sapiens OX=9606 GN=TPM1 PE=1 SV=2	HUMAN	4
505	4.03	4.03	40.8	sp|Q16706|MA2A1_HUMAN	Alpha-mannosidase 2 OS=Homo sapiens OX=9606 GN=MAN2A1 PE=1 SV=2	HUMAN	4
506	4.03	4.03	54.2	tr|I3L1J2|I3L1J2_HUMAN	Cadherin-5 OS=Homo sapiens OX=9606 GN=CDH5 PE=1 SV=1	HUMAN	3
507	4.03	4.03	44	sp|Q92765|SFRP3_HUMAN	Secreted frizzled-related protein 3 OS=Homo sapiens OX=9606 GN=FRZB PE=1 SV=2	HUMAN	4
508	4.02	4.02	34.3	sp|Q9ULF5|S39AA_HUMAN	Zinc transporter ZIP10 OS=Homo sapiens OX=9606 GN=SLC39A10 PE=1 SV=2	HUMAN	2
509	4.02	4.02	47	tr|E9PRU1|E9PRU1_HUMAN	EGF-containing fibulin-like extracellular matrix protein 2 OS=Homo sapiens OX=9606 GN=EFEMP2 PE=1 SV=1	HUMAN	3
510	4.01	169.76	93.7	tr|D6RF35|D6RF35_HUMAN	Vitamin D-binding protein OS=Homo sapiens OX=9606 GN=GC PE=1 SV=1	HUMAN	357
511	4.01	4.01	43.5	tr|B7ZKJ3|B7ZKJ3_HUMAN	EPH receptor A5 OS=Homo sapiens OX=9606 GN=EPHA5 PE=1 SV=1	HUMAN	4
512	4.01	4.01	45.7	sp|Q02487|DSC2_HUMAN	Desmocollin-2 OS=Homo sapiens OX=9606 GN=DSC2 PE=1 SV=1	HUMAN	2
513	4.01	4.01	39.1	sp|Q9HBR0|S38AA_HUMAN	Putative sodium-coupled neutral amino acid transporter 10 OS=Homo sapiens OX=9606 GN=SLC38A10 PE=1 SV=2	HUMAN	3
514	4.01	4.01	37.9	sp|Q9H4F8-2|SMOC1_HUMAN	Isoform 2 of SPARC-related modular calcium-binding protein 1 OS=Homo sapiens OX=9606 GN=SMOC1	HUMAN	2
515	4.01	4.01	92.6	tr|F6RFD5|F6RFD5_HUMAN	Destrin OS=Homo sapiens OX=9606 GN=DSTN PE=1 SV=1	HUMAN	2
516	4	6	47.9	sp|P01594|KV133_HUMAN	Immunoglobulin kappa variable 1-33 OS=Homo sapiens OX=9606 GN=IGKV1-33 PE=1 SV=2	HUMAN	4
517	4	4.05	73.9	sp|P04433|KV311_HUMAN	Immunoglobulin kappa variable 3-11 OS=Homo sapiens OX=9606 GN=IGKV3-11 PE=1 SV=1	HUMAN	4
518	4	4	34.8	sp|O75093|SLIT1_HUMAN	Slit homolog 1 protein OS=Homo sapiens OX=9606 GN=SLIT1 PE=2 SV=4	HUMAN	3
519	4	4	46.8	tr|G3XAK1|G3XAK1_HUMAN	Hepatocyte growth factor-like protein OS=Homo sapiens OX=9606 GN=MST1 PE=1 SV=1	HUMAN	2
520	4	4	39	tr|H0YDE5|H0YDE5_HUMAN	UPF0606 protein KIAA1549L (Fragment) OS=Homo sapiens OX=9606 GN=KIAA1549L PE=1 SV=1	HUMAN	4
521	4	4	38.1	sp|Q6ZRP7|QSOX2_HUMAN	Sulfhydryl oxidase 2 OS=Homo sapiens OX=9606 GN=QSOX2 PE=1 SV=3	HUMAN	2
522	4	4	27.4	sp|Q5VUB5|F1711_HUMAN	Protein FAM171A1 OS=Homo sapiens OX=9606 GN=FAM171A1 PE=1 SV=1	HUMAN	2
523	4	4	32.9	sp|Q13634|CAD18_HUMAN	Cadherin-18 OS=Homo sapiens OX=9606 GN=CDH18 PE=2 SV=1	HUMAN	2
524	4	4	31	tr|H0Y4P7|H0Y4P7_HUMAN	Collagen alpha-1(XII) chain (Fragment) OS=Homo sapiens OX=9606 GN=COL12A1 PE=1 SV=1	HUMAN	2
525	4	4	55.8	sp|Q96JF0-2|SIAT2_HUMAN	Isoform 2 of Beta-galactoside alpha-2,6-sialyltransferase 2 OS=Homo sapiens OX=9606 GN=ST6GAL2	HUMAN	2
526	4	4	40.2	sp|Q99538|LGMN_HUMAN	Legumain OS=Homo sapiens OX=9606 GN=LGMN PE=1 SV=1	HUMAN	2
527	4	4	72.6	sp|O43291|SPIT2_HUMAN	Kunitz-type protease inhibitor 2 OS=Homo sapiens OX=9606 GN=SPINT2 PE=1 SV=2	HUMAN	2
528	4	4	23	sp|Q96FT7|ASIC4_HUMAN	Acid-sensing ion channel 4 OS=Homo sapiens OX=9606 GN=ASIC4 PE=1 SV=2	HUMAN	2
529	4	4	50.2	sp|Q9BXJ1|C1QT1_HUMAN	Complement C1q tumor necrosis factor-related protein 1 OS=Homo sapiens OX=9606 GN=C1QTNF1 PE=1 SV=1	HUMAN	2
530	4	4	30.6	sp|Q6P9A2|GLT18_HUMAN	Polypeptide N-acetylgalactosaminyltransferase 18 OS=Homo sapiens OX=9606 GN=GALNT18 PE=2 SV=2	HUMAN	2
531	4	4	31.5	sp|P52797|EFNA3_HUMAN	Ephrin-A3 OS=Homo sapiens OX=9606 GN=EFNA3 PE=1 SV=1	HUMAN	3
532	4	4	34.5	tr|A0A087WYG6|A0A087WYG6_HUMAN	Ly-6/neurotoxin-like protein 1 (Fragment) OS=Homo sapiens OX=9606 GN=LYNX1 PE=1 SV=1	HUMAN	3
533	3.97	4	42.1	sp|P00505|AATM_HUMAN	Aspartate aminotransferase, mitochondrial OS=Homo sapiens OX=9606 GN=GOT2 PE=1 SV=3	HUMAN	6
534	3.97	3.97	39.6	sp|P52799|EFNB2_HUMAN	Ephrin-B2 OS=Homo sapiens OX=9606 GN=EFNB2 PE=1 SV=1	HUMAN	2
535	3.96	6.45	62.7	sp|P45877|PPIC_HUMAN	Peptidyl-prolyl cis-trans isomerase C OS=Homo sapiens OX=9606 GN=PPIC PE=1 SV=1	HUMAN	5
536	3.94	3.94	50.1	sp|Q9NY97-2|B3GN2_HUMAN	Isoform 2 of N-acetyllactosaminide beta-1,3-N-acetylglucosaminyltransferase 2 OS=Homo sapiens OX=9606 GN=B3GNT2	HUMAN	3
537	3.92	3.92	46.4	tr|A0A0A0MQU6|A0A0A0MQU6_HUMAN	Sema domain, transmembrane domain (TM), and cytoplasmic domain, (Semaphorin) 6A, isoform CRA_d OS=Homo sapiens OX=9606 GN=SEMA6A PE=1 SV=1	HUMAN	3
538	3.87	5.93	30.7	sp|Q9H2A7|CXL16_HUMAN	C-X-C motif chemokine 16 OS=Homo sapiens OX=9606 GN=CXCL16 PE=2 SV=4	HUMAN	4
539	3.84	3.84	52	sp|O43405-2|COCH_HUMAN	Isoform 2 of Cochlin OS=Homo sapiens OX=9606 GN=COCH	HUMAN	4
540	3.82	3.82	65.6	sp|P06703|S10A6_HUMAN	Protein S100-A6 OS=Homo sapiens OX=9606 GN=S100A6 PE=1 SV=1	HUMAN	3
541	3.8	6	36.7	sp|Q8NFZ3-2|NLGNY_HUMAN	Isoform 2 of Neuroligin-4, Y-linked OS=Homo sapiens OX=9606 GN=NLGN4Y	HUMAN	4
542	3.77	3.77	27.9	sp|Q86TY3-2|CN037_HUMAN	Isoform 2 of Uncharacterized protein C14orf37 OS=Homo sapiens OX=9606 GN=C14orf37	HUMAN	2
543	3.72	3.72	68.6	sp|Q9BU40-2|CRDL1_HUMAN	Isoform 2 of Chordin-like protein 1 OS=Homo sapiens OX=9606 GN=CHRDL1	HUMAN	4
544	3.65	3.65	45.1	sp|P35443|TSP4_HUMAN	Thrombospondin-4 OS=Homo sapiens OX=9606 GN=THBS4 PE=1 SV=2	HUMAN	3
545	3.57	7.93	76.4	tr|E9PKE3|E9PKE3_HUMAN	Heat shock cognate 71 kDa protein OS=Homo sapiens OX=9606 GN=HSPA8 PE=1 SV=1	HUMAN	8
546	3.57	3.57	51	sp|O95158|NXPH4_HUMAN	Neurexophilin-4 OS=Homo sapiens OX=9606 GN=NXPH4 PE=2 SV=3	HUMAN	3
547	3.52	3.52	38.2	sp|Q8IW52|SLIK4_HUMAN	SLIT and NTRK-like protein 4 OS=Homo sapiens OX=9606 GN=SLITRK4 PE=1 SV=1	HUMAN	2
548	3.51	3.51	30.4	sp|Q9H8J5|MANS1_HUMAN	MANSC domain-containing protein 1 OS=Homo sapiens OX=9606 GN=MANSC1 PE=2 SV=1	HUMAN	3
549	3.48	3.48	36.7	sp|Q14393-5|GAS6_HUMAN	Isoform 5 of Growth arrest-specific protein 6 OS=Homo sapiens OX=9606 GN=GAS6	HUMAN	3
550	3.41	3.41	61.4	sp|Q92954-5|PRG4_HUMAN	Isoform E of Proteoglycan 4 OS=Homo sapiens OX=9606 GN=PRG4	HUMAN	3
551	3.4	3.4	69	sp|Q16568|CART_HUMAN	Cocaine- and amphetamine-regulated transcript protein OS=Homo sapiens OX=9606 GN=CARTPT PE=1 SV=1	HUMAN	2
552	3.38	3.38	41.4	tr|F8WE98|F8WE98_HUMAN	Filamin-A (Fragment) OS=Homo sapiens OX=9606 GN=FLNA PE=1 SV=2	HUMAN	2
553	3.29	5.36	37.4	sp|Q8IWV2|CNTN4_HUMAN	Contactin-4 OS=Homo sapiens OX=9606 GN=CNTN4 PE=1 SV=1	HUMAN	4
554	3.29	3.29	46.2	sp|Q08431-2|MFGM_HUMAN	Isoform 2 of Lactadherin OS=Homo sapiens OX=9606 GN=MFGE8	HUMAN	3
555	3.2	3.2	62.1	sp|Q6UWR7|ENPP6_HUMAN	Ectonucleotide pyrophosphatase/phosphodiesterase family member 6 OS=Homo sapiens OX=9606 GN=ENPP6 PE=1 SV=2	HUMAN	3
556	3.18	5.22	55.9	sp|Q9P232|CNTN3_HUMAN	Contactin-3 OS=Homo sapiens OX=9606 GN=CNTN3 PE=1 SV=3	HUMAN	5
557	3.16	3.16	27	sp|Q8TER0-5|SNED1_HUMAN	Isoform 4 of Sushi, nidogen and EGF-like domain-containing protein 1 OS=Homo sapiens OX=9606 GN=SNED1	HUMAN	3
558	3.16	3.16	51.2	sp|P48723|HSP13_HUMAN	Heat shock 70 kDa protein 13 OS=Homo sapiens OX=9606 GN=HSPA13 PE=1 SV=1	HUMAN	3
559	3.13	3.13	38.8	sp|P68363-2|TBA1B_HUMAN	Isoform 2 of Tubulin alpha-1B chain OS=Homo sapiens OX=9606 GN=TUBA1B	HUMAN	2
560	3.12	3.12	49.1	tr|E9PIF4|E9PIF4_HUMAN	Sialidase-1 OS=Homo sapiens OX=9606 GN=NEU1 PE=1 SV=1	HUMAN	2
561	3.09	3.09	73.7	sp|A6NLU5|VTM2B_HUMAN	V-set and transmembrane domain-containing protein 2B OS=Homo sapiens OX=9606 GN=VSTM2B PE=3 SV=2	HUMAN	4
562	3.09	3.09	67.6	sp|P99999|CYC_HUMAN	Cytochrome c OS=Homo sapiens OX=9606 GN=CYCS PE=1 SV=2	HUMAN	3
563	3.08	3.08	40.9	sp|O75493|CAH11_HUMAN	Carbonic anhydrase-related protein 11 OS=Homo sapiens OX=9606 GN=CA11 PE=1 SV=2	HUMAN	2
564	3.06	3.12	50.6	sp|P35527|K1C9_HUMAN	Keratin, type I cytoskeletal 9 OS=Homo sapiens OX=9606 GN=KRT9 PE=1 SV=3	HUMAN	5
565	2.99	2.99	33.7	sp|P55291|CAD15_HUMAN	Cadherin-15 OS=Homo sapiens OX=9606 GN=CDH15 PE=1 SV=1	HUMAN	2
566	2.83	2.83	46.5	sp|O14786-3|NRP1_HUMAN	Isoform 3 of Neuropilin-1 OS=Homo sapiens OX=9606 GN=NRP1	HUMAN	3
567	2.82	9.12	47	sp|Q9NZP8|C1RL_HUMAN	Complement C1r subcomponent-like protein OS=Homo sapiens OX=9606 GN=C1RL PE=1 SV=2	HUMAN	14
568	2.81	2.81	41.8	sp|P02778|CXL10_HUMAN	C-X-C motif chemokine 10 OS=Homo sapiens OX=9606 GN=CXCL10 PE=1 SV=2	HUMAN	2
569	2.71	2.71	36.7	sp|Q9UPU3|SORC3_HUMAN	VPS10 domain-containing receptor SorCS3 OS=Homo sapiens OX=9606 GN=SORCS3 PE=1 SV=2	HUMAN	3
570	2.68	2.68	28.5	sp|P34059|GALNS_HUMAN	N-acetylgalactosamine-6-sulfatase OS=Homo sapiens OX=9606 GN=GALNS PE=1 SV=1	HUMAN	2
571	2.63	2.63	27.1	sp|O95970-3|LGI1_HUMAN	Isoform 3 of Leucine-rich glioma-inactivated protein 1 OS=Homo sapiens OX=9606 GN=LGI1	HUMAN	2
572	2.61	2.61	59.6	sp|Q6ZSJ9|SHSA6_HUMAN	Protein shisa-6 OS=Homo sapiens OX=9606 GN=SHISA6 PE=2 SV=2	HUMAN	2
573	2.53	55.34	90	sp|P01042-3|KNG1_HUMAN	Isoform 3 of Kininogen-1 OS=Homo sapiens OX=9606 GN=KNG1	HUMAN	78
574	2.52	2.52	36.3	sp|Q9UJA9|ENPP5_HUMAN	Ectonucleotide pyrophosphatase/phosphodiesterase family member 5 OS=Homo sapiens OX=9606 GN=ENPP5 PE=1 SV=1	HUMAN	2
575	2.49	2.49	44.2	sp|Q53TS8-4|C2CD6_HUMAN	Isoform 4 of C2 calcium-dependent domain-containing protein 6 OS=Homo sapiens OX=9606 GN=C2CD6	HUMAN	3
576	2.49	2.49	33.7	tr|A0A0G2JQD6|A0A0G2JQD6_HUMAN	Extracellular serine/threonine protein kinase FAM20C (Fragment) OS=Homo sapiens OX=9606 GN=FAM20C PE=1 SV=1	HUMAN	2
577	2.49	2.49	35.6	sp|O95998|I18BP_HUMAN	Interleukin-18-binding protein OS=Homo sapiens OX=9606 GN=IL18BP PE=1 SV=2	HUMAN	3
578	2.47	3.3	30.4	sp|P01624|KV315_HUMAN	Immunoglobulin kappa variable 3-15 OS=Homo sapiens OX=9606 GN=IGKV3-15 PE=1 SV=2	HUMAN	6
579	2.43	2.43	69.9	sp|P05109|S10A8_HUMAN	Protein S100-A8 OS=Homo sapiens OX=9606 GN=S100A8 PE=1 SV=1	HUMAN	3
580	2.43	2.43	27.4	sp|P80748|LV321_HUMAN	Immunoglobulin lambda variable 3-21 OS=Homo sapiens OX=9606 GN=IGLV3-21 PE=1 SV=2	HUMAN	2
581	2.42	2.5	58.1	sp|P03951-2|FA11_HUMAN	Isoform 2 of Coagulation factor XI OS=Homo sapiens OX=9606 GN=F11	HUMAN	3
582	2.42	2.42	42.1	sp|P00740-2|FA9_HUMAN	Isoform 2 of Coagulation factor IX OS=Homo sapiens OX=9606 GN=F9	HUMAN	2
583	2.41	2.41	31.8	sp|P53634|CATC_HUMAN	Dipeptidyl peptidase 1 OS=Homo sapiens OX=9606 GN=CTSC PE=1 SV=2	HUMAN	4
584	2.39	2.39	48.1	sp|Q86SR1-3|GLT10_HUMAN	Isoform 3 of Polypeptide N-acetylgalactosaminyltransferase 10 OS=Homo sapiens OX=9606 GN=GALNT10	HUMAN	2
585	2.39	2.39	36.2	tr|H3BMU8|H3BMU8_HUMAN	Group XV phospholipase A2 (Fragment) OS=Homo sapiens OX=9606 GN=PLA2G15 PE=1 SV=1	HUMAN	2
586	2.38	10.31	73.3	sp|P62258|1433E_HUMAN	14-3-3 protein epsilon OS=Homo sapiens OX=9606 GN=YWHAE PE=1 SV=1	HUMAN	8
587	2.38	2.38	48.9	sp|P10721|KIT_HUMAN	Mast/stem cell growth factor receptor Kit OS=Homo sapiens OX=9606 GN=KIT PE=1 SV=1	HUMAN	2
588	2.37	2.37	46.8	sp|P16519-2|NEC2_HUMAN	Isoform 2 of Neuroendocrine convertase 2 OS=Homo sapiens OX=9606 GN=PCSK2	HUMAN	3
589	2.37	2.37	51.7	sp|P15151-3|PVR_HUMAN	Isoform Gamma of Poliovirus receptor OS=Homo sapiens OX=9606 GN=PVR	HUMAN	3
590	2.37	2.37	42.3	sp|Q9NPD7|NRN1_HUMAN	Neuritin OS=Homo sapiens OX=9606 GN=NRN1 PE=2 SV=1	HUMAN	4
591	2.36	5.85	64.5	sp|P50395-2|GDIB_HUMAN	Isoform 2 of Rab GDP dissociation inhibitor beta OS=Homo sapiens OX=9606 GN=GDI2	HUMAN	4
592	2.35	2.35	46.6	tr|K7ER74|K7ER74_HUMAN	APOC4-APOC2 readthrough (NMD candidate) OS=Homo sapiens OX=9606 GN=APOC4-APOC2 PE=1 SV=1	HUMAN	2
593	2.33	2.33	49.7	tr|A0A0B4J1R6|A0A0B4J1R6_HUMAN	Transketolase OS=Homo sapiens OX=9606 GN=TKT PE=1 SV=1	HUMAN	2
594	2.33	2.33	98.9	tr|Q5T123|Q5T123_HUMAN	SH3 domain-binding glutamic acid-rich-like protein 3 OS=Homo sapiens OX=9606 GN=SH3BGRL3 PE=1 SV=1	HUMAN	2
595	2.31	2.31	35.5	sp|Q6YHK3-2|CD109_HUMAN	Isoform 2 of CD109 antigen OS=Homo sapiens OX=9606 GN=CD109	HUMAN	6
596	2.31	2.31	42.8	sp|Q8IWU5-2|SULF2_HUMAN	Isoform 2 of Extracellular sulfatase Sulf-2 OS=Homo sapiens OX=9606 GN=SULF2	HUMAN	2
597	2.31	2.31	28	tr|G3V3J8|G3V3J8_HUMAN	Phospholipase D4 (Fragment) OS=Homo sapiens OX=9606 GN=PLD4 PE=1 SV=1	HUMAN	3
598	2.3	2.3	56.4	sp|P84157|MXRA7_HUMAN	Matrix-remodeling-associated protein 7 OS=Homo sapiens OX=9606 GN=MXRA7 PE=1 SV=1	HUMAN	2
599	2.29	2.29	35.4	sp|Q9H8L6|MMRN2_HUMAN	Multimerin-2 OS=Homo sapiens OX=9606 GN=MMRN2 PE=1 SV=2	HUMAN	3
600	2.25	2.25	37.1	sp|O43529|CHSTA_HUMAN	Carbohydrate sulfotransferase 10 OS=Homo sapiens OX=9606 GN=CHST10 PE=1 SV=1	HUMAN	1
601	2.23	4.25	36.7	sp|P21810|PGS1_HUMAN	Biglycan OS=Homo sapiens OX=9606 GN=BGN PE=1 SV=2	HUMAN	2
602	2.23	2.23	28.6	sp|Q9UM22|EPDR1_HUMAN	Mammalian ependymin-related protein 1 OS=Homo sapiens OX=9606 GN=EPDR1 PE=1 SV=2	HUMAN	1
603	2.22	4.24	30.5	sp|P11279|LAMP1_HUMAN	Lysosome-associated membrane glycoprotein 1 OS=Homo sapiens OX=9606 GN=LAMP1 PE=1 SV=3	HUMAN	3
604	2.22	2.22	51.5	sp|P15586|GNS_HUMAN	N-acetylglucosamine-6-sulfatase OS=Homo sapiens OX=9606 GN=GNS PE=1 SV=3	HUMAN	2
605	2.18	2.18	46.5	sp|Q9P0K9|FRS1L_HUMAN	DOMON domain-containing protein FRRS1L OS=Homo sapiens OX=9606 GN=FRRS1L PE=1 SV=2	HUMAN	1
606	2.16	2.16	56.8	sp|O75752|B3GL1_HUMAN	UDP-GalNAc:beta-1,3-N-acetylgalactosaminyltransferase 1 OS=Homo sapiens OX=9606 GN=B3GALNT1 PE=1 SV=1	HUMAN	2
607	2.16	2.16	43.3	tr|J3QRM6|J3QRM6_HUMAN	Netrin receptor DCC (Fragment) OS=Homo sapiens OX=9606 GN=DCC PE=1 SV=1	HUMAN	2
608	2.15	2.15	41.8	sp|P20916-2|MAG_HUMAN	Isoform 2 of Myelin-associated glycoprotein OS=Homo sapiens OX=9606 GN=MAG	HUMAN	3
609	2.15	2.15	41.2	sp|P41217-3|OX2G_HUMAN	Isoform 3 of OX-2 membrane glycoprotein OS=Homo sapiens OX=9606 GN=CD200	HUMAN	4
610	2.15	2.15	88	sp|Q14019|COTL1_HUMAN	Coactosin-like protein OS=Homo sapiens OX=9606 GN=COTL1 PE=1 SV=3	HUMAN	1
611	2.15	2.15	40.9	sp|Q99650-2|OSMR_HUMAN	Isoform 2 of Oncostatin-M-specific receptor subunit beta OS=Homo sapiens OX=9606 GN=OSMR	HUMAN	2
612	2.12	2.12	60.6	sp|Q92878-3|RAD50_HUMAN	Isoform 3 of DNA repair protein RAD50 OS=Homo sapiens OX=9606 GN=RAD50	HUMAN	8
613	2.11	2.11	95.2	sp|P23582|ANFC_HUMAN	C-type natriuretic peptide OS=Homo sapiens OX=9606 GN=NPPC PE=1 SV=1	HUMAN	1
614	2.1	21.25	45.5	sp|P20742|PZP_HUMAN	Pregnancy zone protein OS=Homo sapiens OX=9606 GN=PZP PE=1 SV=4	HUMAN	37
615	2.1	2.1	48.4	sp|Q9BX67|JAM3_HUMAN	Junctional adhesion molecule C OS=Homo sapiens OX=9606 GN=JAM3 PE=1 SV=1	HUMAN	1
616	2.1	2.1	50.4	sp|Q9NZK5-2|ADA2_HUMAN	Isoform 2 of Adenosine deaminase 2 OS=Homo sapiens OX=9606 GN=ADA2	HUMAN	2
617	2.09	2.09	30.9	sp|Q8IYJ0|PIANP_HUMAN	PILR alpha-associated neural protein OS=Homo sapiens OX=9606 GN=PIANP PE=2 SV=1	HUMAN	2
619	2.08	2.08	37.7	sp|P00918|CAH2_HUMAN	Carbonic anhydrase 2 OS=Homo sapiens OX=9606 GN=CA2 PE=1 SV=2	HUMAN	1
620	2.07	2.07	31.5	tr|Q5VT82|Q5VT82_HUMAN	Protocadherin-9 OS=Homo sapiens OX=9606 GN=PCDH9 PE=1 SV=1	HUMAN	2
621	2.07	2.07	57.3	sp|Q5JZY3-2|EPHAA_HUMAN	Isoform 2 of Ephrin type-A receptor 10 OS=Homo sapiens OX=9606 GN=EPHA10	HUMAN	3
622	2.06	2.06	20.5	sp|Q9P2E7-2|PCD10_HUMAN	Isoform 2 of Protocadherin-10 OS=Homo sapiens OX=9606 GN=PCDH10	HUMAN	2
623	2.06	2.06	47.8	tr|A0A140T9D0|A0A140T9D0_HUMAN	Xyloside xylosyltransferase 1 OS=Homo sapiens OX=9606 GN=XXYLT1 PE=1 SV=1	HUMAN	2
624	2.05	2.05	74.1	sp|P52566|GDIR2_HUMAN	Rho GDP-dissociation inhibitor 2 OS=Homo sapiens OX=9606 GN=ARHGDIB PE=1 SV=3	HUMAN	2
625	2.05	2.05	40.5	sp|Q969H8|MYDGF_HUMAN	Myeloid-derived growth factor OS=Homo sapiens OX=9606 GN=MYDGF PE=1 SV=1	HUMAN	1
626	2.03	61.05	60.2	sp|P10451|OSTP_HUMAN	Osteopontin OS=Homo sapiens OX=9606 GN=SPP1 PE=1 SV=1	HUMAN	119
627	2.03	4.13	58	sp|A6NGN9|IGLO5_HUMAN	IgLON family member 5 OS=Homo sapiens OX=9606 GN=IGLON5 PE=2 SV=4	HUMAN	2
628	2.03	2.03	32.1	sp|Q03167|TGBR3_HUMAN	Transforming growth factor beta receptor type 3 OS=Homo sapiens OX=9606 GN=TGFBR3 PE=1 SV=3	HUMAN	3
629	2.03	2.03	22.3	sp|Q7Z6J2|GRASP_HUMAN	General receptor for phosphoinositides 1-associated scaffold protein OS=Homo sapiens OX=9606 GN=GRASP PE=1 SV=1	HUMAN	2
630	2.03	2.03	66.7	sp|Q9NTU7|CBLN4_HUMAN	Cerebellin-4 OS=Homo sapiens OX=9606 GN=CBLN4 PE=1 SV=1	HUMAN	2
631	2.02	2.02	38.3	sp|O95407|TNF6B_HUMAN	Tumor necrosis factor receptor superfamily member 6B OS=Homo sapiens OX=9606 GN=TNFRSF6B PE=1 SV=1	HUMAN	1
632	2.01	43.92	90.7	sp|P63261|ACTG_HUMAN	Actin, cytoplasmic 2 OS=Homo sapiens OX=9606 GN=ACTG1 PE=1 SV=1	HUMAN	36
633	2.01	2.01	32.6	sp|Q9Y6D5|BIG2_HUMAN	Brefeldin A-inhibited guanine nucleotide-exchange protein 2 OS=Homo sapiens OX=9606 GN=ARFGEF2 PE=1 SV=3	HUMAN	2
634	2.01	2.01	36.8	sp|P55786|PSA_HUMAN	Puromycin-sensitive aminopeptidase OS=Homo sapiens OX=9606 GN=NPEPPS PE=1 SV=2	HUMAN	2
635	2.01	2.01	35.3	sp|P98095-2|FBLN2_HUMAN	Isoform 2 of Fibulin-2 OS=Homo sapiens OX=9606 GN=FBLN2	HUMAN	2
636	2.01	2.01	43.3	sp|P15509|CSF2R_HUMAN	Granulocyte-macrophage colony-stimulating factor receptor subunit alpha OS=Homo sapiens OX=9606 GN=CSF2RA PE=1 SV=1	HUMAN	1
638	2.01	2.01	49.9	sp|Q9BXJ3|C1QT4_HUMAN	Complement C1q tumor necrosis factor-related protein 4 OS=Homo sapiens OX=9606 GN=C1QTNF4 PE=1 SV=2	HUMAN	1
639	2.01	2.01	37.5	sp|Q9UKB5|AJAP1_HUMAN	Adherens junction-associated protein 1 OS=Homo sapiens OX=9606 GN=AJAP1 PE=1 SV=1	HUMAN	2
640	2.01	2.01	42.9	tr|J3QRA1|J3QRA1_HUMAN	Fractalkine OS=Homo sapiens OX=9606 GN=CX3CL1 PE=1 SV=1	HUMAN	2
641	2.01	2.01	21.7	sp|P06310|KV230_HUMAN	Immunoglobulin kappa variable 2-30 OS=Homo sapiens OX=9606 GN=IGKV2-30 PE=3 SV=2	HUMAN	1
642	2	205.38	93.5	tr|A0A0A0MS51|A0A0A0MS51_HUMAN	Gelsolin OS=Homo sapiens OX=9606 GN=GSN PE=1 SV=1	HUMAN	441
643	2	160.27	76.9	sp|Q92823-4|NRCAM_HUMAN	Isoform 4 of Neuronal cell adhesion molecule OS=Homo sapiens OX=9606 GN=NRCAM	HUMAN	211
644	2	134.7	80.8	sp|P51693-2|APLP1_HUMAN	Isoform 2 of Amyloid-like protein 1 OS=Homo sapiens OX=9606 GN=APLP1	HUMAN	245
645	2	121.05	72.8	tr|A0A087X0M8|A0A087X0M8_HUMAN	Neural cell adhesion molecule L1-like protein OS=Homo sapiens OX=9606 GN=CHL1 PE=1 SV=1	HUMAN	185
646	2	14.03	83.9	sp|P07108|ACBP_HUMAN	Acyl-CoA-binding protein OS=Homo sapiens OX=9606 GN=DBI PE=1 SV=2	HUMAN	10
647	2	6.82	74.9	sp|P30490|1B52_HUMAN	HLA class I histocompatibility antigen, B-52 alpha chain OS=Homo sapiens OX=9606 GN=HLA-B PE=1 SV=1	HUMAN	5
648	2	5.63	39.7	tr|H0Y4H1|H0Y4H1_HUMAN	Receptor-type tyrosine-protein phosphatase F (Fragment) OS=Homo sapiens OX=9606 GN=PTPRF PE=1 SV=1	HUMAN	5
649	2	4	67.6	tr|A6NC48|A6NC48_HUMAN	ADP-ribosyl cyclase/cyclic ADP-ribose hydrolase 2 OS=Homo sapiens OX=9606 GN=BST1 PE=1 SV=1	HUMAN	2
650	2	2.87	38.7	sp|P12830-2|CADH1_HUMAN	Isoform 2 of Cadherin-1 OS=Homo sapiens OX=9606 GN=CDH1	HUMAN	2
651	2	2.58	69.8	sp|A0A0B4J1V0|HV315_HUMAN	Immunoglobulin heavy variable 3-15 OS=Homo sapiens OX=9606 GN=IGHV3-15 PE=3 SV=1	HUMAN	2
652	2	2.11	44.6	sp|Q8IUK8|CBLN2_HUMAN	Cerebellin-2 OS=Homo sapiens OX=9606 GN=CBLN2 PE=2 SV=1	HUMAN	4
654	2	2	49.3	tr|A0A0A0MTC7|A0A0A0MTC7_HUMAN	Laminin subunit alpha-4 OS=Homo sapiens OX=9606 GN=LAMA4 PE=1 SV=1	HUMAN	1
655	2	2	45.6	sp|Q7Z591|AKNA_HUMAN	AT-hook-containing transcription factor OS=Homo sapiens OX=9606 GN=AKNA PE=1 SV=2	HUMAN	1
656	2	2	44.5	sp|Q8N157|AHI1_HUMAN	Jouberin OS=Homo sapiens OX=9606 GN=AHI1 PE=1 SV=1	HUMAN	1
657	2	2	25.7	sp|Q96MT7-2|CFA44_HUMAN	Isoform 2 of Cilia- and flagella-associated protein 44 OS=Homo sapiens OX=9606 GN=CFAP44	HUMAN	1
658	2	2	34.6	sp|P28827|PTPRM_HUMAN	Receptor-type tyrosine-protein phosphatase mu OS=Homo sapiens OX=9606 GN=PTPRM PE=1 SV=2	HUMAN	1
659	2	2	47.4	sp|Q9BQF6|SENP7_HUMAN	Sentrin-specific protease 7 OS=Homo sapiens OX=9606 GN=SENP7 PE=1 SV=4	HUMAN	1
660	2	2	40	sp|Q8IYE0|CC146_HUMAN	Coiled-coil domain-containing protein 146 OS=Homo sapiens OX=9606 GN=CCDC146 PE=1 SV=2	HUMAN	1
661	2	2	48.9	sp|P25440-2|BRD2_HUMAN	Isoform 2 of Bromodomain-containing protein 2 OS=Homo sapiens OX=9606 GN=BRD2	HUMAN	1
662	2	2	34.6	sp|A1L4H1|SRCRL_HUMAN	Soluble scavenger receptor cysteine-rich domain-containing protein SSC5D OS=Homo sapiens OX=9606 GN=SSC5D PE=1 SV=3	HUMAN	2
663	2	2	51.6	tr|A0A087WX45|A0A087WX45_HUMAN	IQ domain-containing protein E OS=Homo sapiens OX=9606 GN=IQCE PE=1 SV=1	HUMAN	1
664	2	2	31.4	sp|Q9UBG0|MRC2_HUMAN	C-type mannose receptor 2 OS=Homo sapiens OX=9606 GN=MRC2 PE=1 SV=2	HUMAN	1
665	2	2	32.2	sp|O14917|PCD17_HUMAN	Protocadherin-17 OS=Homo sapiens OX=9606 GN=PCDH17 PE=2 SV=2	HUMAN	2
666	2	2	52.5	sp|Q8NFP4-2|MDGA1_HUMAN	Isoform 2 of MAM domain-containing glycosylphosphatidylinositol anchor protein 1 OS=Homo sapiens OX=9606 GN=MDGA1	HUMAN	1
667	2	2	28.4	sp|P09619|PGFRB_HUMAN	Platelet-derived growth factor receptor beta OS=Homo sapiens OX=9606 GN=PDGFRB PE=1 SV=1	HUMAN	1
668	2	2	30.2	tr|B1AJS1|B1AJS1_HUMAN	Astrotactin-1 OS=Homo sapiens OX=9606 GN=ASTN1 PE=1 SV=1	HUMAN	1
669	2	2	34.6	sp|Q9UGM3-4|DMBT1_HUMAN	Isoform 4 of Deleted in malignant brain tumors 1 protein OS=Homo sapiens OX=9606 GN=DMBT1	HUMAN	1
670	2	2	55	sp|P08133|ANXA6_HUMAN	Annexin A6 OS=Homo sapiens OX=9606 GN=ANXA6 PE=1 SV=3	HUMAN	1
671	2	2	37	sp|O75077|ADA23_HUMAN	Disintegrin and metalloproteinase domain-containing protein 23 OS=Homo sapiens OX=9606 GN=ADAM23 PE=1 SV=1	HUMAN	1
672	2	2	44.8	sp|Q6ZMI3|GLDN_HUMAN	Gliomedin OS=Homo sapiens OX=9606 GN=GLDN PE=1 SV=1	HUMAN	1
673	2	2	41.1	tr|H0YA68|H0YA68_HUMAN	Alpha-mannosidase (Fragment) OS=Homo sapiens OX=9606 GN=MAN2B2 PE=1 SV=1	HUMAN	1
674	2	2	46.5	tr|G3XAD9|G3XAD9_HUMAN	Alpha-N-acetylgalactosaminide alpha-2,6-sialyltransferase 1 OS=Homo sapiens OX=9606 GN=ST6GALNAC1 PE=1 SV=1	HUMAN	1
675	2	2	35.9	sp|Q15276|RABE1_HUMAN	Rab GTPase-binding effector protein 1 OS=Homo sapiens OX=9606 GN=RABEP1 PE=1 SV=2	HUMAN	2
676	2	2	48.2	sp|Q9HD45|TM9S3_HUMAN	Transmembrane 9 superfamily member 3 OS=Homo sapiens OX=9606 GN=TM9SF3 PE=1 SV=2	HUMAN	1
677	2	2	38.2	sp|P15169|CBPN_HUMAN	Carboxypeptidase N catalytic chain OS=Homo sapiens OX=9606 GN=CPN1 PE=1 SV=1	HUMAN	1
678	2	2	31.5	sp|Q8N428|GLT16_HUMAN	Polypeptide N-acetylgalactosaminyltransferase 16 OS=Homo sapiens OX=9606 GN=GALNT16 PE=1 SV=2	HUMAN	3
679	2	2	76.7	sp|Q06323|PSME1_HUMAN	Proteasome activator complex subunit 1 OS=Homo sapiens OX=9606 GN=PSME1 PE=1 SV=1	HUMAN	1
680	2	2	29.3	sp|Q9H2G4|TSYL2_HUMAN	Testis-specific Y-encoded-like protein 2 OS=Homo sapiens OX=9606 GN=TSPYL2 PE=1 SV=1	HUMAN	1
681	2	2	45.6	sp|Q9Y266|NUDC_HUMAN	Nuclear migration protein nudC OS=Homo sapiens OX=9606 GN=NUDC PE=1 SV=1	HUMAN	1
682	2	2	61.8	sp|P40926|MDHM_HUMAN	Malate dehydrogenase, mitochondrial OS=Homo sapiens OX=9606 GN=MDH2 PE=1 SV=3	HUMAN	1
683	2	2	45.6	sp|Q9NYX4|CALY_HUMAN	Neuron-specific vesicular protein calcyon OS=Homo sapiens OX=9606 GN=CALY PE=1 SV=1	HUMAN	1
684	2	2	81.5	sp|A0A1B0GUT2|CJ143_HUMAN	Uncharacterized protein C10orf143 OS=Homo sapiens OX=9606 GN=C10orf143 PE=4 SV=1	HUMAN	4
685	2	2	24.4	tr|A0A087WT95|A0A087WT95_HUMAN	Acyl-coenzyme A thioesterase 2, mitochondrial OS=Homo sapiens OX=9606 GN=ACOT2 PE=1 SV=1	HUMAN	1
686	2	2	71.1	sp|Q9P0L0|VAPA_HUMAN	Vesicle-associated membrane protein-associated protein A OS=Homo sapiens OX=9606 GN=VAPA PE=1 SV=3	HUMAN	1
687	2	2	24.9	sp|P15291|B4GT1_HUMAN	Beta-1,4-galactosyltransferase 1 OS=Homo sapiens OX=9606 GN=B4GALT1 PE=1 SV=5	HUMAN	1
688	2	2	43.9	tr|G5E9T8|G5E9T8_HUMAN	Golgi SNAP receptor complex member 1 (Fragment) OS=Homo sapiens OX=9606 GN=GOSR1 PE=1 SV=2	HUMAN	1
689	2	2	48.9	tr|E7EQR8|E7EQR8_HUMAN	Protein YIPF3 OS=Homo sapiens OX=9606 GN=YIPF3 PE=1 SV=1	HUMAN	3
690	2	2	22.5	sp|P48029|SC6A8_HUMAN	Sodium- and chloride-dependent creatine transporter 1 OS=Homo sapiens OX=9606 GN=SLC6A8 PE=1 SV=1	HUMAN	1
691	2	2	23.3	sp|O95196|CSPG5_HUMAN	Chondroitin sulfate proteoglycan 5 OS=Homo sapiens OX=9606 GN=CSPG5 PE=1 SV=3	HUMAN	2
692	2	2	61.6	sp|O76061|STC2_HUMAN	Stanniocalcin-2 OS=Homo sapiens OX=9606 GN=STC2 PE=1 SV=1	HUMAN	1
693	2	2	66	tr|K7EJE1|K7EJE1_HUMAN	NADH dehydrogenase [ubiquinone] 1 alpha subcomplex subunit 13 OS=Homo sapiens OX=9606 GN=NDUFA13 PE=4 SV=1	HUMAN	1
694	2	2	41.4	tr|G3V4G8|G3V4G8_HUMAN	Uncharacterized protein C14orf28 OS=Homo sapiens OX=9606 GN=C14orf28 PE=4 SV=1	HUMAN	1
695	2	2	47.9	sp|Q69YZ2|T200B_HUMAN	Transmembrane protein 200B OS=Homo sapiens OX=9606 GN=TMEM200B PE=2 SV=1	HUMAN	1
696	2	2	45.6	tr|V9PBN7|V9PBN7_HUMAN	Aquaporin 4 isoform delta4 OS=Homo sapiens OX=9606 GN=AQP4 PE=1 SV=1	HUMAN	2
697	2	2	21.4	tr|D6RFM1|D6RFM1_HUMAN	Pro-thyrotropin-releasing hormone OS=Homo sapiens OX=9606 GN=TRH PE=1 SV=1	HUMAN	1
698	2	2	59.2	tr|A8MU27|A8MU27_HUMAN	Small ubiquitin-related modifier 3 OS=Homo sapiens OX=9606 GN=SUMO3 PE=1 SV=1	HUMAN	1
699	2	2	43.8	sp|P81605-2|DCD_HUMAN	Isoform 2 of Dermcidin OS=Homo sapiens OX=9606 GN=DCD	HUMAN	1
700	2	2	39.3	sp|P21246|PTN_HUMAN	Pleiotrophin OS=Homo sapiens OX=9606 GN=PTN PE=1 SV=1	HUMAN	1
701	2	2	47.9	tr|F8VZX9|F8VZX9_HUMAN	Methionine aminopeptidase 2 (Fragment) OS=Homo sapiens OX=9606 GN=METAP2 PE=1 SV=1	HUMAN	1
702	2	2	65.4	tr|C9JH98|C9JH98_HUMAN	Neuropilin-2 (Fragment) OS=Homo sapiens OX=9606 GN=NRP2 PE=1 SV=8	HUMAN	1
703	2	2	39.5	sp|Q9NY72|SCN3B_HUMAN	Sodium channel subunit beta-3 OS=Homo sapiens OX=9606 GN=SCN3B PE=1 SV=1	HUMAN	1
704	2	2	52.1	sp|Q96EE4|CC126_HUMAN	Coiled-coil domain-containing protein 126 OS=Homo sapiens OX=9606 GN=CCDC126 PE=2 SV=2	HUMAN	1
705	2	2	35.5	sp|Q8NC54|KCT2_HUMAN	Keratinocyte-associated transmembrane protein 2 OS=Homo sapiens OX=9606 GN=KCT2 PE=1 SV=2	HUMAN	1
706	2	2	61.6	sp|P42857|NSG1_HUMAN	Neuronal vesicle trafficking-associated protein 1 OS=Homo sapiens OX=9606 GN=NSG1 PE=1 SV=1	HUMAN	1
707	2	2	44.1	sp|P01236|PRL_HUMAN	Prolactin OS=Homo sapiens OX=9606 GN=PRL PE=1 SV=1	HUMAN	1
708	2	2	50	sp|O75629|CREG1_HUMAN	Protein CREG1 OS=Homo sapiens OX=9606 GN=CREG1 PE=1 SV=1	HUMAN	1
709	2	2	66.3	tr|I3L2R6|I3L2R6_HUMAN	Thioredoxin domain-containing protein 17 OS=Homo sapiens OX=9606 GN=TXNDC17 PE=1 SV=1	HUMAN	1
710	2	2	34.2	sp|P10124|SRGN_HUMAN	Serglycin OS=Homo sapiens OX=9606 GN=SRGN PE=1 SV=3	HUMAN	2
711	2	2	37.5	sp|P08493-2|MGP_HUMAN	Isoform 2 of Matrix Gla protein OS=Homo sapiens OX=9606 GN=MGP	HUMAN	1
712	2	2	45.4	sp|P01303|NPY_HUMAN	Pro-neuropeptide Y OS=Homo sapiens OX=9606 GN=NPY PE=1 SV=1	HUMAN	2
713	2	2	41.7	tr|H0YBX3|H0YBX3_HUMAN	2-iminobutanoate/2-iminopropanoate deaminase (Fragment) OS=Homo sapiens OX=9606 GN=RIDA PE=1 SV=1	HUMAN	1
714	2	2	26.5	sp|Q9GZX9|TWSG1_HUMAN	Twisted gastrulation protein homolog 1 OS=Homo sapiens OX=9606 GN=TWSG1 PE=1 SV=1	HUMAN	1
715	2	2	33.2	sp|Q8TBP5|F174A_HUMAN	Membrane protein FAM174A OS=Homo sapiens OX=9606 GN=FAM174A PE=2 SV=1	HUMAN	1
716	2	2	25.3	tr|J3QKK2|J3QKK2_HUMAN	Secreted and transmembrane protein 1 (Fragment) OS=Homo sapiens OX=9606 GN=SECTM1 PE=1 SV=1	HUMAN	1
717	2	2	38.2	tr|A6NGJ0|A6NGJ0_HUMAN	Dynein light chain Tctex-type 3 OS=Homo sapiens OX=9606 GN=DYNLT3 PE=1 SV=1	HUMAN	1
718	2	2	42.5	sp|Q8NI22|MCFD2_HUMAN	Multiple coagulation factor deficiency protein 2 OS=Homo sapiens OX=9606 GN=MCFD2 PE=1 SV=1	HUMAN	1
719	2	2	21	sp|P20827|EFNA1_HUMAN	Ephrin-A1 OS=Homo sapiens OX=9606 GN=EFNA1 PE=1 SV=2	HUMAN	1
720	2	2	8.1	tr|H0Y4A2|H0Y4A2_HUMAN	tRNA (cytosine(38)-C(5))-methyltransferase (Fragment) OS=Homo sapiens OX=9606 GN=TRDMT1 PE=1 SV=2	HUMAN	1
721	1.96	1.96	41.7	sp|P14174|MIF_HUMAN	Macrophage migration inhibitory factor OS=Homo sapiens OX=9606 GN=MIF PE=1 SV=4	HUMAN	1
722	1.95	1.95	36.4	sp|P30740|ILEU_HUMAN	Leukocyte elastase inhibitor OS=Homo sapiens OX=9606 GN=SERPINB1 PE=1 SV=1	HUMAN	3
723	1.9	1.9	48.6	sp|Q86Y38|XYLT1_HUMAN	Xylosyltransferase 1 OS=Homo sapiens OX=9606 GN=XYLT1 PE=1 SV=1	HUMAN	2
724	1.9	1.9	44	sp|Q9UNZ2-4|NSF1C_HUMAN	Isoform 2 of NSFL1 cofactor p47 OS=Homo sapiens OX=9606 GN=NSFL1C	HUMAN	1
725	1.89	1.89	47.3	sp|Q9P219|DAPLE_HUMAN	Protein Daple OS=Homo sapiens OX=9606 GN=CCDC88C PE=1 SV=3	HUMAN	1
726	1.89	1.89	71.3	sp|P22626-2|ROA2_HUMAN	Isoform A2 of Heterogeneous nuclear ribonucleoproteins A2/B1 OS=Homo sapiens OX=9606 GN=HNRNPA2B1	HUMAN	1
727	1.89	1.89	63.2	sp|P35754|GLRX1_HUMAN	Glutaredoxin-1 OS=Homo sapiens OX=9606 GN=GLRX PE=1 SV=2	HUMAN	1
729	1.85	1.85	33.7	sp|Q05BQ5-3|MBTD1_HUMAN	Isoform 3 of MBT domain-containing protein 1 OS=Homo sapiens OX=9606 GN=MBTD1	HUMAN	1
730	1.83	1.83	76.9	sp|P14207|FOLR2_HUMAN	Folate receptor beta OS=Homo sapiens OX=9606 GN=FOLR2 PE=1 SV=4	HUMAN	1
731	1.82	1.82	45.2	sp|Q9Y2Y4|ZBT32_HUMAN	Zinc finger and BTB domain-containing protein 32 OS=Homo sapiens OX=9606 GN=ZBTB32 PE=1 SV=1	HUMAN	1
732	1.82	1.82	39.7	tr|Q96GW1|Q96GW1_HUMAN	Endoplasmin OS=Homo sapiens OX=9606 GN=HSP90B1 PE=1 SV=1	HUMAN	1
733	1.77	1.77	37.5	sp|P63010-3|AP2B1_HUMAN	Isoform 3 of AP-2 complex subunit beta OS=Homo sapiens OX=9606 GN=AP2B1	HUMAN	3
734	1.75	1.75	44.2	sp|O75071|EFC14_HUMAN	EF-hand calcium-binding domain-containing protein 14 OS=Homo sapiens OX=9606 GN=EFCAB14 PE=1 SV=1	HUMAN	2
735	1.72	35.55	75.9	tr|A0A0D9SF98|A0A0D9SF98_HUMAN	Neural cell adhesion molecule 1 (Fragment) OS=Homo sapiens OX=9606 GN=NCAM1 PE=1 SV=1	HUMAN	52
736	1.71	1.71	36.4	sp|O75592|MYCB2_HUMAN	E3 ubiquitin-protein ligase MYCBP2 OS=Homo sapiens OX=9606 GN=MYCBP2 PE=1 SV=3	HUMAN	2
737	1.7	1.7	84.7	tr|F8WA34|F8WA34_HUMAN	Acylphosphatase OS=Homo sapiens OX=9606 GN=ACYP2 PE=1 SV=1	HUMAN	1
738	1.7	1.7	41.7	tr|H0Y9X5|H0Y9X5_HUMAN	Endoplasmic reticulum aminopeptidase 1 (Fragment) OS=Homo sapiens OX=9606 GN=ERAP1 PE=1 SV=1	HUMAN	1
739	1.68	1.68	25.1	sp|Q86UQ4-4|ABCAD_HUMAN	Isoform 4 of ATP-binding cassette sub-family A member 13 OS=Homo sapiens OX=9606 GN=ABCA13	HUMAN	3
740	1.64	1.64	48.3	sp|Q15149|PLEC_HUMAN	Plectin OS=Homo sapiens OX=9606 GN=PLEC PE=1 SV=3	HUMAN	3
741	1.64	1.64	35.9	sp|Q8N3K9|CMYA5_HUMAN	Cardiomyopathy-associated protein 5 OS=Homo sapiens OX=9606 GN=CMYA5 PE=1 SV=3	HUMAN	1
742	1.64	1.64	31.7	sp|Q04721|NOTC2_HUMAN	Neurogenic locus notch homolog protein 2 OS=Homo sapiens OX=9606 GN=NOTCH2 PE=1 SV=3	HUMAN	1
743	1.64	1.64	38.2	sp|O75339|CILP1_HUMAN	Cartilage intermediate layer protein 1 OS=Homo sapiens OX=9606 GN=CILP PE=1 SV=4	HUMAN	1
744	1.64	1.64	18.4	sp|Q6UVK1|CSPG4_HUMAN	Chondroitin sulfate proteoglycan 4 OS=Homo sapiens OX=9606 GN=CSPG4 PE=1 SV=2	HUMAN	2
745	1.64	1.64	30.8	tr|B9A012|B9A012_HUMAN	Myosin VIIA, isoform CRA_a OS=Homo sapiens OX=9606 GN=MYO7A PE=1 SV=1	HUMAN	1
746	1.62	1.62	72.7	tr|H0YM51|H0YM51_HUMAN	Protein CASC4 (Fragment) OS=Homo sapiens OX=9606 GN=CASC4 PE=1 SV=1	HUMAN	2
747	1.6	1.6	69.8	sp|Q15828|CYTM_HUMAN	Cystatin-M OS=Homo sapiens OX=9606 GN=CST6 PE=1 SV=1	HUMAN	3
748	1.59	1.59	36.3	tr|H0YGT0|H0YGT0_HUMAN	Low affinity immunoglobulin gamma Fc region receptor II-c OS=Homo sapiens OX=9606 GN=FCGR2C PE=4 SV=1	HUMAN	1
749	1.55	1.55	36.8	sp|Q16695|H31T_HUMAN	Histone H3.1t OS=Homo sapiens OX=9606 GN=HIST3H3 PE=1 SV=3	HUMAN	1
750	1.54	1.54	21.5	sp|P04070|PROC_HUMAN	Vitamin K-dependent protein C OS=Homo sapiens OX=9606 GN=PROC PE=1 SV=1	HUMAN	2
751	1.54	1.54	42.7	sp|P04211|LV743_HUMAN	Immunoglobulin lambda variable 7-43 OS=Homo sapiens OX=9606 GN=IGLV7-43 PE=3 SV=2	HUMAN	1
752	1.48	1.48	43	sp|P15121|ALDR_HUMAN	Aldose reductase OS=Homo sapiens OX=9606 GN=AKR1B1 PE=1 SV=3	HUMAN	1
753	1.48	1.48	39.8	sp|Q15848|ADIPO_HUMAN	Adiponectin OS=Homo sapiens OX=9606 GN=ADIPOQ PE=1 SV=1	HUMAN	1
754	1.48	1.48	98	tr|H0YFD7|H0YFD7_HUMAN	Ubiquitin carboxyl-terminal hydrolase 28 (Fragment) OS=Homo sapiens OX=9606 GN=USP28 PE=1 SV=1	HUMAN	1
755	1.44	1.44	46.3	tr|A0A087WZQ5|A0A087WZQ5_HUMAN	Tyrosine-protein kinase Mer OS=Homo sapiens OX=9606 GN=MERTK PE=1 SV=1	HUMAN	1
756	1.44	1.44	46.5	sp|Q10472|GALT1_HUMAN	Polypeptide N-acetylgalactosaminyltransferase 1 OS=Homo sapiens OX=9606 GN=GALNT1 PE=1 SV=1	HUMAN	4
757	1.36	1.36	49.5	tr|H0YL77|H0YL77_HUMAN	Uncharacterized protein (Fragment) OS=Homo sapiens OX=9606 PE=4 SV=2	HUMAN	1
758	1.34	1.34	50.4	sp|Q96N16-3|JKIP1_HUMAN	Isoform 3 of Janus kinase and microtubule-interacting protein 1 OS=Homo sapiens OX=9606 GN=JAKMIP1	HUMAN	1
759	1.34	1.34	58.6	sp|O94760|DDAH1_HUMAN	N(G),N(G)-dimethylarginine dimethylaminohydrolase 1 OS=Homo sapiens OX=9606 GN=DDAH1 PE=1 SV=3	HUMAN	1
760	1.33	3.38	51	sp|Q8IUK5-3|PLDX1_HUMAN	Isoform 3 of Plexin domain-containing protein 1 OS=Homo sapiens OX=9606 GN=PLXDC1	HUMAN	2
761	1.33	1.33	35.8	sp|Q13519|PNOC_HUMAN	Prepronociceptin OS=Homo sapiens OX=9606 GN=PNOC PE=1 SV=1	HUMAN	2
762	1.31	1.31	52.5	sp|Q13501-2|SQSTM_HUMAN	Isoform 2 of Sequestosome-1 OS=Homo sapiens OX=9606 GN=SQSTM1	HUMAN	1
763	1.3	1.3	46.2	sp|D6REC4|CFA99_HUMAN	Cilia- and flagella-associated protein 99 OS=Homo sapiens OX=9606 GN=CFAP99 PE=3 SV=1	HUMAN	1
764	1.3	1.3	52.3	tr|E5RGR6|E5RGR6_HUMAN	GDNF family receptor alpha-2 (Fragment) OS=Homo sapiens OX=9606 GN=GFRA2 PE=1 SV=6	HUMAN	1
765	1.28	1.28	49.6	sp|Q96C24-2|SYTL4_HUMAN	Isoform 2 of Synaptotagmin-like protein 4 OS=Homo sapiens OX=9606 GN=SYTL4	HUMAN	4
766	1.27	1.27	49.5	sp|Q8NFA2-4|NOXO1_HUMAN	Isoform 4 of NADPH oxidase organizer 1 OS=Homo sapiens OX=9606 GN=NOXO1	HUMAN	1
767	1.25	1.25	57.7	tr|B4E171|B4E171_HUMAN	Tetraspanin OS=Homo sapiens OX=9606 PE=2 SV=1	HUMAN	1
768	1.24	18.04	78.4	sp|P01344-3|IGF2_HUMAN	Isoform 3 of Insulin-like growth factor II OS=Homo sapiens OX=9606 GN=IGF2	HUMAN	16
769	1.22	1.22	28.7	sp|Q8N2H3|PYRD2_HUMAN	Pyridine nucleotide-disulfide oxidoreductase domain-containing protein 2 OS=Homo sapiens OX=9606 GN=PYROXD2 PE=1 SV=2	HUMAN	3
770	1.22	1.22	40.6	sp|Q5T4T6-2|SYC2L_HUMAN	Isoform 2 of Synaptonemal complex protein 2-like OS=Homo sapiens OX=9606 GN=SYCP2L	HUMAN	1
771	1.22	1.22	31.7	tr|A0A1B0GWB3|A0A1B0GWB3_HUMAN	EF-hand domain-containing protein 1 OS=Homo sapiens OX=9606 GN=EFHC1 PE=1 SV=1	HUMAN	1
772	1.21	1.21	48.7	sp|O95206-2|PCDH8_HUMAN	Isoform 2 of Protocadherin-8 OS=Homo sapiens OX=9606 GN=PCDH8	HUMAN	2
773	1.19	1.19	40	tr|Q5TA02|Q5TA02_HUMAN	Glutathione S-transferase omega-1 (Fragment) OS=Homo sapiens OX=9606 GN=GSTO1 PE=1 SV=1	HUMAN	1
774	1.19	1.19	73	sp|P06307|CCKN_HUMAN	Cholecystokinin OS=Homo sapiens OX=9606 GN=CCK PE=1 SV=1	HUMAN	3
775	1.17	1.17	25.6	sp|Q8NFT8|DNER_HUMAN	Delta and Notch-like epidermal growth factor-related receptor OS=Homo sapiens OX=9606 GN=DNER PE=1 SV=1	HUMAN	3
776	1.17	1.17	20.6	sp|Q16288-2|NTRK3_HUMAN	Isoform 2 of NT-3 growth factor receptor OS=Homo sapiens OX=9606 GN=NTRK3	HUMAN	3
777	1.15	1.15	25.7	tr|H7C109|H7C109_HUMAN	Putative ATP-dependent RNA helicase DHX57 (Fragment) OS=Homo sapiens OX=9606 GN=DHX57 PE=1 SV=1	HUMAN	1
778	1.12	1.13	36.1	sp|Q8WYK1|CNTP5_HUMAN	Contactin-associated protein-like 5 OS=Homo sapiens OX=9606 GN=CNTNAP5 PE=2 SV=1	HUMAN	4
779	1.12	1.12	50.8	tr|F6SXV3|F6SXV3_HUMAN	Calcium-responsive transcription factor OS=Homo sapiens OX=9606 GN=CARF PE=4 SV=1	HUMAN	1
780	1.12	1.12	29.1	sp|Q7LFX5|CHSTF_HUMAN	Carbohydrate sulfotransferase 15 OS=Homo sapiens OX=9606 GN=CHST15 PE=1 SV=1	HUMAN	1
781	1.12	1.12	44.6	tr|M0QXF2|M0QXF2_HUMAN	Sodium/potassium-transporting ATPase subunit alpha-3 (Fragment) OS=Homo sapiens OX=9606 GN=ATP1A3 PE=1 SV=2	HUMAN	1
782	1.09	1.09	32	tr|A0A1B0GTZ4|A0A1B0GTZ4_HUMAN	Serine/threonine-protein kinase DCLK3 OS=Homo sapiens OX=9606 GN=DCLK3 PE=4 SV=1	HUMAN	1
783	1.09	1.09	52.9	tr|G3V192|G3V192_HUMAN	Ferritin OS=Homo sapiens OX=9606 GN=FTH1 PE=1 SV=1	HUMAN	1
784	1.07	1.07	37.1	sp|Q504Y0-2|S39AC_HUMAN	Isoform 2 of Zinc transporter ZIP12 OS=Homo sapiens OX=9606 GN=SLC39A12	HUMAN	1
785	1.06	1.06	52.7	sp|Q15746-9|MYLK_HUMAN	Isoform 7 of Myosin light chain kinase, smooth muscle OS=Homo sapiens OX=9606 GN=MYLK	HUMAN	1
786	1.04	1.04	61.3	tr|R4GMM9|R4GMM9_HUMAN	Neurexophilin OS=Homo sapiens OX=9606 GN=NXPH1 PE=1 SV=1	HUMAN	1
787	1.03	8.66	40.2	tr|E9PF17|E9PF17_HUMAN	Versican core protein OS=Homo sapiens OX=9606 GN=VCAN PE=1 SV=2	HUMAN	9
788	1.02	1.02	78.9	tr|H0Y8M1|H0Y8M1_HUMAN	Nephronectin (Fragment) OS=Homo sapiens OX=9606 GN=NPNT PE=4 SV=1	HUMAN	2
789	1.01	1.01	47.1	sp|Q8IVU3-2|HERC6_HUMAN	Isoform 2 of Probable E3 ubiquitin-protein ligase HERC6 OS=Homo sapiens OX=9606 GN=HERC6	HUMAN	1
790	1.01	1.01	17.5	tr|G8JLH6|G8JLH6_HUMAN	Tetraspanin (Fragment) OS=Homo sapiens OX=9606 GN=CD9 PE=1 SV=1	HUMAN	1
791	1	1	27.9	sp|Q9UJ99|CAD22_HUMAN	Cadherin-22 OS=Homo sapiens OX=9606 GN=CDH22 PE=2 SV=2	HUMAN	1
792	0.99	0.99	81.3	tr|J3KSD8|J3KSD8_HUMAN	Bleomycin hydrolase (Fragment) OS=Homo sapiens OX=9606 GN=BLMH PE=1 SV=8	HUMAN	1
793	0.99	0.99	4.8	tr|J3QL46|J3QL46_HUMAN	Period circadian protein homolog 1 (Fragment) OS=Homo sapiens OX=9606 GN=PER1 PE=1 SV=1	HUMAN	1
794	0.98	0.98	56.6	sp|Q7RTS1|BHA15_HUMAN	Class A basic helix-loop-helix protein 15 OS=Homo sapiens OX=9606 GN=BHLHA15 PE=1 SV=1	HUMAN	1
795	0.97	0.97	57.9	sp|Q76KX8-2|ZN534_HUMAN	Isoform 2 of Zinc finger protein 534 OS=Homo sapiens OX=9606 GN=ZNF534	HUMAN	1
796	0.96	1.85	40.7	tr|C9JCF5|C9JCF5_HUMAN	Lactotransferrin (Fragment) OS=Homo sapiens OX=9606 GN=LTF PE=1 SV=1	HUMAN	2
797	0.96	0.96	17.1	sp|Q9H8G2-2|CAAP1_HUMAN	Isoform 2 of Caspase activity and apoptosis inhibitor 1 OS=Homo sapiens OX=9606 GN=CAAP1	HUMAN	1
798	0.95	0.95	38.8	tr|C9JA41|C9JA41_HUMAN	UPF0577 protein KIAA1324-like OS=Homo sapiens OX=9606 GN=KIAA1324L PE=1 SV=1	HUMAN	1
799	0.92	0.92	35.1	sp|O75636|FCN3_HUMAN	Ficolin-3 OS=Homo sapiens OX=9606 GN=FCN3 PE=1 SV=2	HUMAN	1
800	0.89	3	81.3	sp|P07951-2|TPM2_HUMAN	Isoform 2 of Tropomyosin beta chain OS=Homo sapiens OX=9606 GN=TPM2	HUMAN	3
801	0.88	0.88	25.7	sp|Q9NPH3-3|IL1AP_HUMAN	Isoform 3 of Interleukin-1 receptor accessory protein OS=Homo sapiens OX=9606 GN=IL1RAP	HUMAN	1
802	0.87	2.43	53.1	tr|H0YIN9|H0YIN9_HUMAN	Keratin, type II cytoskeletal 5 (Fragment) OS=Homo sapiens OX=9606 GN=KRT5 PE=1 SV=1	HUMAN	3
803	0.87	0.87	52.1	tr|J3QR06|J3QR06_HUMAN	Uncharacterized protein OS=Homo sapiens OX=9606 PE=4 SV=2	HUMAN	1
805	0.86	0.86	47.3	sp|P31146|COR1A_HUMAN	Coronin-1A OS=Homo sapiens OX=9606 GN=CORO1A PE=1 SV=4	HUMAN	1
806	0.84	0.84	52.2	tr|H3BPK2|H3BPK2_HUMAN	Metallothionein-3 OS=Homo sapiens OX=9606 GN=MT3 PE=1 SV=1	HUMAN	1
808	0.83	20.66	59	sp|P39060-2|COIA1_HUMAN	Isoform 3 of Collagen alpha-1(XVIII) chain OS=Homo sapiens OX=9606 GN=COL18A1	HUMAN	23
809	0.82	0.82	17.9	sp|Q9Y6Y8-2|S23IP_HUMAN	Isoform 2 of SEC23-interacting protein OS=Homo sapiens OX=9606 GN=SEC23IP	HUMAN	1
810	0.81	0.81	58.5	sp|Q9HC38|GLOD4_HUMAN	Glyoxalase domain-containing protein 4 OS=Homo sapiens OX=9606 GN=GLOD4 PE=1 SV=1	HUMAN	1
812	0.8	0.8	17.8	sp|Q9NZC2|TREM2_HUMAN	Triggering receptor expressed on myeloid cells 2 OS=Homo sapiens OX=9606 GN=TREM2 PE=1 SV=1	HUMAN	1
814	0.78	0.78	47.9	tr|Q5T2X4|Q5T2X4_HUMAN	Centrosome-associated protein 350 (Fragment) OS=Homo sapiens OX=9606 GN=CEP350 PE=1 SV=1	HUMAN	1
815	0.77	0.77	36.8	sp|P22087|FBRL_HUMAN	rRNA 2'-O-methyltransferase fibrillarin OS=Homo sapiens OX=9606 GN=FBL PE=1 SV=2	HUMAN	1
816	0.76	0.76	79.1	sp|P49760-2|CLK2_HUMAN	Isoform 2 of Dual specificity protein kinase CLK2 OS=Homo sapiens OX=9606 GN=CLK2	HUMAN	1
817	0.76	0.76	76.7	sp|P12273|PIP_HUMAN	Prolactin-inducible protein OS=Homo sapiens OX=9606 GN=PIP PE=1 SV=1	HUMAN	1
819	0.73	0.73	37.9	sp|P98153-3|IDD_HUMAN	Isoform 3 of Integral membrane protein DGCR2/IDD OS=Homo sapiens OX=9606 GN=DGCR2	HUMAN	1
820	0.73	0.73	37.4	sp|Q6UWN0-2|LYPD4_HUMAN	Isoform 2 of Ly6/PLAUR domain-containing protein 4 OS=Homo sapiens OX=9606 GN=LYPD4	HUMAN	1
821	0.71	0.71	58.5	tr|C9JJX6|C9JJX6_HUMAN	Armadillo repeat protein deleted in velo-cardio-facial syndrome OS=Homo sapiens OX=9606 GN=ARVCF PE=1 SV=1	HUMAN	1
822	0.71	0.71	62.3	sp|Q15072|OZF_HUMAN	Zinc finger protein OZF OS=Homo sapiens OX=9606 GN=ZNF146 PE=1 SV=2	HUMAN	1
823	0.71	0.71	29.8	sp|P00492|HPRT_HUMAN	Hypoxanthine-guanine phosphoribosyltransferase OS=Homo sapiens OX=9606 GN=HPRT1 PE=1 SV=2	HUMAN	1
824	0.7	0.7	37.5	sp|P35555|FBN1_HUMAN	Fibrillin-1 OS=Homo sapiens OX=9606 GN=FBN1 PE=1 SV=3	HUMAN	1
825	0.7	0.7	36.7	sp|Q9NT68|TEN2_HUMAN	Teneurin-2 OS=Homo sapiens OX=9606 GN=TENM2 PE=1 SV=3	HUMAN	1
828	0.66	0.66	28	tr|H7C2V8|H7C2V8_HUMAN	Histone-lysine N-methyltransferase 2C (Fragment) OS=Homo sapiens OX=9606 GN=KMT2C PE=1 SV=1	HUMAN	1
829	0.65	0.65	45.8	sp|P53367-2|ARFP1_HUMAN	Isoform A of Arfaptin-1 OS=Homo sapiens OX=9606 GN=ARFIP1	HUMAN	1
830	0.64	0.64	84.1	tr|A0A0A0MRY9|A0A0A0MRY9_HUMAN	Cell death activator CIDE-3 OS=Homo sapiens OX=9606 GN=CIDEC PE=4 SV=1	HUMAN	1
832	0.62	0.62	33.8	sp|P27487|DPP4_HUMAN	Dipeptidyl peptidase 4 OS=Homo sapiens OX=9606 GN=DPP4 PE=1 SV=2	HUMAN	1
834	0.58	0.58	41	tr|A2A3P3|A2A3P3_HUMAN	Centrosomal protein of 85 kDa-like (Fragment) OS=Homo sapiens OX=9606 GN=CEP85L PE=1 SV=1	HUMAN	1
835	0.57	0.57	57.8	tr|A0A0A0MQZ4|A0A0A0MQZ4_HUMAN	Protein phosphatase 1K, mitochondrial OS=Homo sapiens OX=9606 GN=PPM1K PE=1 SV=1	HUMAN	1
836	0.57	0.57	64.5	sp|Q9UHF0|TKNK_HUMAN	Tachykinin-3 OS=Homo sapiens OX=9606 GN=TAC3 PE=1 SV=1	HUMAN	1
837	0.56	0.56	59.6	sp|Q9NVU0-3|RPC5_HUMAN	Isoform 3 of DNA-directed RNA polymerase III subunit RPC5 OS=Homo sapiens OX=9606 GN=POLR3E	HUMAN	1
838	0.54	0.54	27.8	tr|G3V511|G3V511_HUMAN	Latent-transforming growth factor beta-binding protein 2 OS=Homo sapiens OX=9606 GN=LTBP2 PE=1 SV=1	HUMAN	3
839	0.54	0.54	18.8	sp|O43827|ANGL7_HUMAN	Angiopoietin-related protein 7 OS=Homo sapiens OX=9606 GN=ANGPTL7 PE=1 SV=1	HUMAN	1
840	0.53	0.59	39.2	tr|F8WBR3|F8WBR3_HUMAN	Roundabout homolog 2 OS=Homo sapiens OX=9606 GN=ROBO2 PE=1 SV=1	HUMAN	1
841	0.53	0.54	32	sp|Q9Y6N6|LAMC3_HUMAN	Laminin subunit gamma-3 OS=Homo sapiens OX=9606 GN=LAMC3 PE=1 SV=3	HUMAN	2
842	0.51	0.51	42.1	sp|Q9HCE5|MET14_HUMAN	N6-adenosine-methyltransferase non-catalytic subunit OS=Homo sapiens OX=9606 GN=METTL14 PE=1 SV=2	HUMAN	1
843	0.51	0.51	35.1	tr|Q9UFM8|Q9UFM8_HUMAN	Neuroplastin (Fragment) OS=Homo sapiens OX=9606 GN=NPTN PE=1 SV=2	HUMAN	1
845	0.5	0.5	42.5	tr|Q9UES5|Q9UES5_HUMAN	Myosin V (Fragment) OS=Homo sapiens OX=9606 GN=MYO5A PE=1 SV=1	HUMAN	1
848	0.48	0.49	42.2	tr|C9J979|C9J979_HUMAN	Integrator complex subunit 11 (Fragment) OS=Homo sapiens OX=9606 GN=INTS11 PE=1 SV=2	HUMAN	1
849	0.48	0.48	40.7	tr|Q5T3N1|Q5T3N1_HUMAN	Annexin (Fragment) OS=Homo sapiens OX=9606 GN=ANXA1 PE=1 SV=1	HUMAN	1
850	0.48	0.48	14.7	tr|E5RG56|E5RG56_HUMAN	Aspartyl/asparaginyl beta-hydroxylase OS=Homo sapiens OX=9606 GN=ASPH PE=1 SV=1	HUMAN	1
851	0.47	0.47	52.5	sp|P00390-5|GSHR_HUMAN	Isoform 4 of Glutathione reductase, mitochondrial OS=Homo sapiens OX=9606 GN=GSR	HUMAN	1
852	0.46	0.46	39.5	sp|P04626-3|ERBB2_HUMAN	Isoform 3 of Receptor tyrosine-protein kinase erbB-2 OS=Homo sapiens OX=9606 GN=ERBB2	HUMAN	1
853	0.46	0.46	27.9	sp|Q495W5-2|FUT11_HUMAN	Isoform 2 of Alpha-(1,3)-fucosyltransferase 11 OS=Homo sapiens OX=9606 GN=FUT11	HUMAN	1
854	0.46	0.46	53.4	sp|Q9UKU9-2|ANGL2_HUMAN	Isoform 2 of Angiopoietin-related protein 2 OS=Homo sapiens OX=9606 GN=ANGPTL2	HUMAN	1
856	0.44	7.17	53	sp|Q02985|FHR3_HUMAN	Complement factor H-related protein 3 OS=Homo sapiens OX=9606 GN=CFHR3 PE=1 SV=2	HUMAN	10
857	0.44	2.94	46.2	sp|Q9NY47-4|CA2D2_HUMAN	Isoform 4 of Voltage-dependent calcium channel subunit alpha-2/delta-2 OS=Homo sapiens OX=9606 GN=CACNA2D2	HUMAN	7
858	0.44	0.44	40.6	tr|E7ERG8|E7ERG8_HUMAN	Low-density lipoprotein receptor-related protein 1B (Fragment) OS=Homo sapiens OX=9606 GN=LRP1B PE=1 SV=8	HUMAN	1
859	0.44	0.44	23.4	sp|Q6ZRS4-2|CC129_HUMAN	Isoform 2 of Coiled-coil domain-containing protein 129 OS=Homo sapiens OX=9606 GN=CCDC129	HUMAN	1
860	0.43	0.43	28.7	tr|J3QT83|J3QT83_HUMAN	Collagen alpha-1(XIV) chain (Fragment) OS=Homo sapiens OX=9606 GN=COL14A1 PE=1 SV=1	HUMAN	2
861	0.43	0.43	24.8	sp|P62424|RL7A_HUMAN	60S ribosomal protein L7a OS=Homo sapiens OX=9606 GN=RPL7A PE=1 SV=2	HUMAN	1
862	0.41	14.95	62.9	sp|Q9HDB5-3|NRX3B_HUMAN	Isoform 3b of Neurexin-3-beta OS=Homo sapiens OX=9606 GN=NRXN3	HUMAN	16
863	0.41	0.41	41.1	sp|Q14766-3|LTBP1_HUMAN	Isoform 3 of Latent-transforming growth factor beta-binding protein 1 OS=Homo sapiens OX=9606 GN=LTBP1	HUMAN	2
864	0.41	0.41	47.7	sp|P46108|CRK_HUMAN	Adapter molecule crk OS=Homo sapiens OX=9606 GN=CRK PE=1 SV=2	HUMAN	1
865	0.4	122.42	70.1	sp|O94985|CSTN1_HUMAN	Calsyntenin-1 OS=Homo sapiens OX=9606 GN=CLSTN1 PE=1 SV=1	HUMAN	163
866	0.4	0.4	34.7	sp|Q9BUD6|SPON2_HUMAN	Spondin-2 OS=Homo sapiens OX=9606 GN=SPON2 PE=1 SV=3	HUMAN	1
868	0.39	0.39	42.2	tr|A0A0A0MRH6|A0A0A0MRH6_HUMAN	Transport and Golgi organization protein 1 homolog (Fragment) OS=Homo sapiens OX=9606 GN=MIA3 PE=1 SV=6	HUMAN	2
869	0.39	0.39	18.2	tr|C9JW74|C9JW74_HUMAN	Mesoderm-specific transcript homolog protein OS=Homo sapiens OX=9606 GN=MEST PE=1 SV=1	HUMAN	1
870	0.39	0.39	60.2	sp|P0DP06|HVD34_HUMAN	Immunoglobulin heavy variable 4-30-4 OS=Homo sapiens OX=9606 GN=IGHV4-30-4 PE=3 SV=1	HUMAN	1
871	0.38	0.38	19.3	tr|A2ABM8|A2ABM8_HUMAN	Epithelial discoidin domain-containing receptor 1 (Fragment) OS=Homo sapiens OX=9606 GN=DDR1 PE=1 SV=1	HUMAN	1
872	0.38	0.38	12.9	sp|P0C629|O10J4_HUMAN	Olfactory receptor 10J4 OS=Homo sapiens OX=9606 GN=OR10J4 PE=3 SV=1	HUMAN	1
873	0.37	0.37	27.2	tr|H7C409|H7C409_HUMAN	Bromodomain and WD repeat-containing protein 1 (Fragment) OS=Homo sapiens OX=9606 GN=BRWD1 PE=1 SV=1	HUMAN	1
874	0.37	0.37	25.1	tr|H0YB62|H0YB62_HUMAN	D-glutamate cyclase, mitochondrial (Fragment) OS=Homo sapiens OX=9606 GN=DGLUCY PE=1 SV=1	HUMAN	1
875	0.37	0.37	32.2	tr|F8WDW9|F8WDW9_HUMAN	Endothelial cell-selective adhesion molecule OS=Homo sapiens OX=9606 GN=ESAM PE=1 SV=1	HUMAN	2
877	0.35	0.35	24.7	sp|Q08499-7|PDE4D_HUMAN	Isoform N3 of cAMP-specific 3',5'-cyclic phosphodiesterase 4D OS=Homo sapiens OX=9606 GN=PDE4D	HUMAN	1
879	0.34	4.44	63.3	sp|P36980|FHR2_HUMAN	Complement factor H-related protein 2 OS=Homo sapiens OX=9606 GN=CFHR2 PE=1 SV=1	HUMAN	6
880	0.34	0.34	39.7	tr|A0A0C4DGZ5|A0A0C4DGZ5_HUMAN	Tyrosine--tRNA ligase OS=Homo sapiens OX=9606 GN=YARS PE=1 SV=1	HUMAN	1
882	0.34	0.34	73.5	tr|Q5VVP7|Q5VVP7_HUMAN	C-reactive protein OS=Homo sapiens OX=9606 GN=CRP PE=1 SV=1	HUMAN	1
883	0.33	0.33	52.3	sp|Q2TAL6|VWC2_HUMAN	Brorin OS=Homo sapiens OX=9606 GN=VWC2 PE=1 SV=1	HUMAN	1
884	0.33	0.33	26.1	sp|Q7Z6K1-2|THAP5_HUMAN	Isoform 2 of THAP domain-containing protein 5 OS=Homo sapiens OX=9606 GN=THAP5	HUMAN	1
885	0.33	0.33	38.5	sp|Q9NUS5|AP5S1_HUMAN	AP-5 complex subunit sigma-1 OS=Homo sapiens OX=9606 GN=AP5S1 PE=1 SV=1	HUMAN	1
886	0.33	0.33	41.5	sp|Q99727|TIMP4_HUMAN	Metalloproteinase inhibitor 4 OS=Homo sapiens OX=9606 GN=TIMP4 PE=2 SV=1	HUMAN	1
888	0.32	0.32	31.3	sp|Q96NL6-2|SCLT1_HUMAN	Isoform 2 of Sodium channel and clathrin linker 1 OS=Homo sapiens OX=9606 GN=SCLT1	HUMAN	1
890	0.31	0.31	48.8	tr|H0YCF5|H0YCF5_HUMAN	Mitogen-activated protein kinase kinase kinase 11 (Fragment) OS=Homo sapiens OX=9606 GN=MAP3K11 PE=4 SV=1	HUMAN	1
891	0.31	0.31	32.8	tr|H7BZA8|H7BZA8_HUMAN	Ral GTPase-activating protein subunit alpha-2 (Fragment) OS=Homo sapiens OX=9606 GN=RALGAPA2 PE=1 SV=1	HUMAN	1
892	0.31	0.31	40.2	tr|A0A0G2JM99|A0A0G2JM99_HUMAN	Leukocyte immunoglobulin-like receptor subfamily A member 3 (Fragment) OS=Homo sapiens OX=9606 GN=LILRA3 PE=1 SV=1	HUMAN	1
895	0.3	0.3	52.1	tr|B4DXS3|B4DXS3_HUMAN	Armadillo repeat-containing protein 3 OS=Homo sapiens OX=9606 GN=ARMC3 PE=1 SV=1	HUMAN	1
897	0.3	0.3	32.5	tr|H0YFA0|H0YFA0_HUMAN	Ubiquitin carboxyl-terminal hydrolase 28 (Fragment) OS=Homo sapiens OX=9606 GN=USP28 PE=1 SV=1	HUMAN	1
898	0.29	0.29	57.3	sp|P57735|RAB25_HUMAN	Ras-related protein Rab-25 OS=Homo sapiens OX=9606 GN=RAB25 PE=1 SV=2	HUMAN	1
902	0.29	0.29	56.1	tr|X6RJV5|X6RJV5_HUMAN	Protein artemis (Fragment) OS=Homo sapiens OX=9606 GN=DCLRE1C PE=4 SV=1	HUMAN	1
905	0.28	0.28	19.2	sp|Q8NFU5|IPMK_HUMAN	Inositol polyphosphate multikinase OS=Homo sapiens OX=9606 GN=IPMK PE=1 SV=1	HUMAN	1
908	0.27	0.27	30.7	sp|O95922-4|TTLL1_HUMAN	Isoform 4 of Probable tubulin polyglutamylase TTLL1 OS=Homo sapiens OX=9606 GN=TTLL1	HUMAN	1
909	0.26	0.26	37.5	sp|P06737-2|PYGL_HUMAN	Isoform 2 of Glycogen phosphorylase, liver form OS=Homo sapiens OX=9606 GN=PYGL	HUMAN	1
911	0.26	0.26	46.3	sp|Q8TB22-4|SPT20_HUMAN	Isoform 4 of Spermatogenesis-associated protein 20 OS=Homo sapiens OX=9606 GN=SPATA20	HUMAN	1
912	0.26	0.26	58	sp|Q9BXJ0|C1QT5_HUMAN	Complement C1q tumor necrosis factor-related protein 5 OS=Homo sapiens OX=9606 GN=C1QTNF5 PE=1 SV=1	HUMAN	3
913	0.26	0.26	37.9	sp|P29279-2|CTGF_HUMAN	Isoform 2 of Connective tissue growth factor OS=Homo sapiens OX=9606 GN=CTGF	HUMAN	1
914	0.25	0.25	59.8	tr|E7EPH4|E7EPH4_HUMAN	Epithelial discoidin domain-containing receptor 1 (Fragment) OS=Homo sapiens OX=9606 GN=DDR1 PE=1 SV=1	HUMAN	1
915	0.25	0.25	57.7	tr|F8WFD9|F8WFD9_HUMAN	Protein shisa-5 OS=Homo sapiens OX=9606 GN=SHISA5 PE=1 SV=1	HUMAN	1
916	0.25	0.25	18.7	sp|Q7Z5J1|DHI1L_HUMAN	Hydroxysteroid 11-beta-dehydrogenase 1-like protein OS=Homo sapiens OX=9606 GN=HSD11B1L PE=2 SV=1	HUMAN	1
917	0.24	9.11	81.2	sp|P01780|HV307_HUMAN	Immunoglobulin heavy variable 3-7 OS=Homo sapiens OX=9606 GN=IGHV3-7 PE=1 SV=2	HUMAN	28
918	0.24	1.93	30.5	sp|Q9HCU4|CELR2_HUMAN	Cadherin EGF LAG seven-pass G-type receptor 2 OS=Homo sapiens OX=9606 GN=CELSR2 PE=1 SV=1	HUMAN	2
919	0.24	0.82	23.7	tr|J3QKW5|J3QKW5_HUMAN	Cadherin-8 OS=Homo sapiens OX=9606 GN=CDH8 PE=1 SV=1	HUMAN	2
920	0.24	0.24	60.8	sp|Q4G0X9-3|CCD40_HUMAN	Isoform 3 of Coiled-coil domain-containing protein 40 OS=Homo sapiens OX=9606 GN=CCDC40	HUMAN	1
921	0.24	0.24	40.2	sp|Q05996-2|ZP2_HUMAN	Isoform 2 of Zona pellucida sperm-binding protein 2 OS=Homo sapiens OX=9606 GN=ZP2	HUMAN	1
922	0.24	0.24	46.5	tr|H0YAV4|H0YAV4_HUMAN	Zinc finger transcription factor Trps1 (Fragment) OS=Homo sapiens OX=9606 GN=TRPS1 PE=1 SV=1	HUMAN	1
924	0.24	0.24	65.9	sp|Q08AM6-2|VAC14_HUMAN	Isoform 2 of Protein VAC14 homolog OS=Homo sapiens OX=9606 GN=VAC14	HUMAN	0
925	0.24	0.24	32.5	sp|Q8WXF8|DEDD2_HUMAN	DNA-binding death effector domain-containing protein 2 OS=Homo sapiens OX=9606 GN=DEDD2 PE=1 SV=1	HUMAN	1
926	0.23	0.24	88.6	tr|H7C5L5|H7C5L5_HUMAN	Hexosyltransferase (Fragment) OS=Homo sapiens OX=9606 GN=CHPF2 PE=1 SV=1	HUMAN	1
931	0.22	0.23	37.3	sp|Q9UJT2-2|TSKS_HUMAN	Isoform 2 of Testis-specific serine kinase substrate OS=Homo sapiens OX=9606 GN=TSKS	HUMAN	1
932	0.22	0.22	39.2	sp|O60513|B4GT4_HUMAN	Beta-1,4-galactosyltransferase 4 OS=Homo sapiens OX=9606 GN=B4GALT4 PE=1 SV=1	HUMAN	0
933	0.22	0.22	31.7	tr|Q53S60|Q53S60_HUMAN	Bile salt export pump (Fragment) OS=Homo sapiens OX=9606 GN=ABCB11 PE=1 SV=1	HUMAN	1
934	0.22	0.22	39.3	sp|Q9HBH5|RDH14_HUMAN	Retinol dehydrogenase 14 OS=Homo sapiens OX=9606 GN=RDH14 PE=1 SV=1	HUMAN	1
936	0.21	0.22	36.3	sp|P25189-2|MYP0_HUMAN	Isoform L-MPZ of Myelin protein P0 OS=Homo sapiens OX=9606 GN=MPZ	HUMAN	1
938	0.21	0.21	62.2	tr|R4GMT1|R4GMT1_HUMAN	Myoneurin (Fragment) OS=Homo sapiens OX=9606 GN=MYNN PE=1 SV=1	HUMAN	0
940	0.21	0.21	18.5	sp|Q9HCS4|TF7L1_HUMAN	Transcription factor 7-like 1 OS=Homo sapiens OX=9606 GN=TCF7L1 PE=2 SV=1	HUMAN	1
941	0.21	0.21	44.2	sp|Q9UMX5|NENF_HUMAN	Neudesin OS=Homo sapiens OX=9606 GN=NENF PE=1 SV=1	HUMAN	0
942	0.21	0.21	18.5	sp|A0A0C4DH43|HV70D_HUMAN	Immunoglobulin heavy variable 2-70D OS=Homo sapiens OX=9606 GN=IGHV2-70D PE=3 SV=1	HUMAN	0
944	0.2	0.2	28.4	tr|G3V133|G3V133_HUMAN	KIAA0676 protein, isoform CRA_d OS=Homo sapiens OX=9606 GN=TBC1D9B PE=1 SV=1	HUMAN	1
945	0.2	0.2	64.5	tr|H0YDK3|H0YDK3_HUMAN	Crossover junction endonuclease MUS81 (Fragment) OS=Homo sapiens OX=9606 GN=MUS81 PE=1 SV=1	HUMAN	0
949	0.19	0.19	35.2	tr|F8W6N3|F8W6N3_HUMAN	Ubiquitin carboxyl-terminal hydrolase OS=Homo sapiens OX=9606 GN=BAP1 PE=1 SV=1	HUMAN	1
951	0.19	0.19	25.2	tr|F5H5X9|F5H5X9_HUMAN	Cadherin-7 OS=Homo sapiens OX=9606 GN=CDH7 PE=1 SV=1	HUMAN	1
952	0.19	0.19	24.1	sp|Q9NRM6|I17RB_HUMAN	Interleukin-17 receptor B OS=Homo sapiens OX=9606 GN=IL17RB PE=1 SV=2	HUMAN	1
955	0.18	0.4	48.9	tr|K7EPJ9|K7EPJ9_HUMAN	Keratin, type I cytoskeletal 17 (Fragment) OS=Homo sapiens OX=9606 GN=KRT17 PE=1 SV=1	HUMAN	0
957	0.18	0.18	74.7	tr|J3KR62|J3KR62_HUMAN	Zinc finger protein 525 OS=Homo sapiens OX=9606 GN=ZNF525 PE=1 SV=1	HUMAN	1
958	0.18	0.18	33.5	tr|A0A1W2PPU7|A0A1W2PPU7_HUMAN	IQ motif and SEC7 domain-containing protein 2 (Fragment) OS=Homo sapiens OX=9606 GN=IQSEC2 PE=1 SV=1	HUMAN	0
959	0.18	0.18	21	sp|O95817|BAG3_HUMAN	BAG family molecular chaperone regulator 3 OS=Homo sapiens OX=9606 GN=BAG3 PE=1 SV=3	HUMAN	1
960	0.18	0.18	24.3	sp|O43248|HXC11_HUMAN	Homeobox protein Hox-C11 OS=Homo sapiens OX=9606 GN=HOXC11 PE=1 SV=1	HUMAN	0
961	0.18	0.18	8.5	sp|Q9HCU0|CD248_HUMAN	Endosialin OS=Homo sapiens OX=9606 GN=CD248 PE=1 SV=1	HUMAN	1
962	0.18	0.18	10.5	sp|Q96DX5|ASB9_HUMAN	Ankyrin repeat and SOCS box protein 9 OS=Homo sapiens OX=9606 GN=ASB9 PE=1 SV=1	HUMAN	0
963	0.17	215	85.6	tr|A0A087WV45|A0A087WV45_HUMAN	Transthyretin OS=Homo sapiens OX=9606 GN=TTR PE=1 SV=1	HUMAN	652
964	0.17	0.18	28.2	tr|A0A087WTY7|A0A087WTY7_HUMAN	Cytosolic beta-glucosidase OS=Homo sapiens OX=9606 GN=GBA3 PE=1 SV=1	HUMAN	1
966	0.17	0.17	30.1	tr|C9J9N2|C9J9N2_HUMAN	Endothelial PAS domain-containing protein 1 (Fragment) OS=Homo sapiens OX=9606 GN=EPAS1 PE=4 SV=1	HUMAN	0
967	0.17	0.17	36.2	sp|P26641|EF1G_HUMAN	Elongation factor 1-gamma OS=Homo sapiens OX=9606 GN=EEF1G PE=1 SV=3	HUMAN	1
973	0.16	0.16	30	sp|P35249-2|RFC4_HUMAN	Isoform 2 of Replication factor C subunit 4 OS=Homo sapiens OX=9606 GN=RFC4	HUMAN	0
976	0.16	0.16	51.6	sp|Q14508|WFDC2_HUMAN	WAP four-disulfide core domain protein 2 OS=Homo sapiens OX=9606 GN=WFDC2 PE=1 SV=2	HUMAN	0
978	0.16	0.16	14.4	tr|A0A087X240|A0A087X240_HUMAN	Ephrin-A5 OS=Homo sapiens OX=9606 GN=EFNA5 PE=1 SV=1	HUMAN	0
979	0.15	3.39	46	sp|P02788-2|TRFL_HUMAN	Isoform DeltaLf of Lactotransferrin OS=Homo sapiens OX=9606 GN=LTF	HUMAN	6
981	0.15	0.15	26.9	sp|O15050|TRNK1_HUMAN	TPR and ankyrin repeat-containing protein 1 OS=Homo sapiens OX=9606 GN=TRANK1 PE=2 SV=4	HUMAN	1
982	0.15	0.15	26	sp|A6NFN3|RFOX3_HUMAN	RNA binding protein fox-1 homolog 3 OS=Homo sapiens OX=9606 GN=RBFOX3 PE=2 SV=4	HUMAN	0
983	0.15	0.15	26.3	sp|Q14964|RB39A_HUMAN	Ras-related protein Rab-39A OS=Homo sapiens OX=9606 GN=RAB39A PE=1 SV=2	HUMAN	0
985	0.14	0.15	60.5	sp|Q641Q3|METRL_HUMAN	Meteorin-like protein OS=Homo sapiens OX=9606 GN=METRNL PE=2 SV=1	HUMAN	0
986	0.14	0.14	28.8	sp|Q8N2C7-7|UNC80_HUMAN	Isoform 7 of Protein unc-80 homolog OS=Homo sapiens OX=9606 GN=UNC80	HUMAN	1
987	0.14	0.14	36	sp|Q8NEL0|CCD54_HUMAN	Coiled-coil domain-containing protein 54 OS=Homo sapiens OX=9606 GN=CCDC54 PE=1 SV=2	HUMAN	0
989	0.14	0.14	32.3	tr|J3QSC0|J3QSC0_HUMAN	Cocaine esterase (Fragment) OS=Homo sapiens OX=9606 GN=CES2 PE=1 SV=1	HUMAN	0
990	0.14	0.14	62	tr|B1AHM5|B1AHM5_HUMAN	Fibulin-1 (Fragment) OS=Homo sapiens OX=9606 GN=FBLN1 PE=4 SV=2	HUMAN	0
992	0.13	0.13	38	sp|Q8IY18|SMC5_HUMAN	Structural maintenance of chromosomes protein 5 OS=Homo sapiens OX=9606 GN=SMC5 PE=1 SV=2	HUMAN	1
993	0.13	0.13	39.1	sp|Q9H254-5|SPTN4_HUMAN	Isoform 5 of Spectrin beta chain, non-erythrocytic 4 OS=Homo sapiens OX=9606 GN=SPTBN4	HUMAN	2
999	0.13	0.13	38.1	tr|I3L0R7|I3L0R7_HUMAN	Active breakpoint cluster region-related protein (Fragment) OS=Homo sapiens OX=9606 GN=ABR PE=1 SV=1	HUMAN	0
1004	0.12	0.12	41.4	tr|E7EMZ0|E7EMZ0_HUMAN	DmX-like protein 1 (Fragment) OS=Homo sapiens OX=9606 GN=DMXL1 PE=1 SV=1	HUMAN	1
1005	0.12	0.12	57.9	sp|Q9Y5K8|VATD_HUMAN	V-type proton ATPase subunit D OS=Homo sapiens OX=9606 GN=ATP6V1D PE=1 SV=1	HUMAN	0
1006	0.12	0.12	32.5	sp|Q8IV42|PSTK_HUMAN	L-seryl-tRNA(Sec) kinase OS=Homo sapiens OX=9606 GN=PSTK PE=1 SV=2	HUMAN	0
1007	0.12	0.12	33.3	sp|O00264|PGRC1_HUMAN	Membrane-associated progesterone receptor component 1 OS=Homo sapiens OX=9606 GN=PGRMC1 PE=1 SV=3	HUMAN	1
1009	0.12	0.12	21	tr|F8WA47|F8WA47_HUMAN	Disabled homolog 2-interacting protein (Fragment) OS=Homo sapiens OX=9606 GN=DAB2IP PE=1 SV=1	HUMAN	0
1010	0.12	0.12	40.6	tr|H0YEM3|H0YEM3_HUMAN	KDEL motif-containing protein 2 (Fragment) OS=Homo sapiens OX=9606 GN=KDELC2 PE=1 SV=1	HUMAN	0
1012	0.12	0.12	44	sp|P61278|SMS_HUMAN	Somatostatin OS=Homo sapiens OX=9606 GN=SST PE=1 SV=1	HUMAN	1
1017	0.11	0.11	54.1	tr|A6PVN5|A6PVN5_HUMAN	Serine/threonine-protein phosphatase 2A activator OS=Homo sapiens OX=9606 GN=PTPA PE=1 SV=1	HUMAN	0
1020	0.11	0.11	24.7	sp|Q14956|GPNMB_HUMAN	Transmembrane glycoprotein NMB OS=Homo sapiens OX=9606 GN=GPNMB PE=1 SV=2	HUMAN	0
1023	0.11	0.11	22.2	tr|A0A1B0GV14|A0A1B0GV14_HUMAN	Uncharacterized protein C1orf112 OS=Homo sapiens OX=9606 GN=C1orf112 PE=1 SV=1	HUMAN	0
1024	0.11	0.11	15.3	tr|E5RIU6|E5RIU6_HUMAN	Cyclin-dependent kinase 1 (Fragment) OS=Homo sapiens OX=9606 GN=CDK1 PE=1 SV=2	HUMAN	0
1025	0.11	0.11	39	tr|I3L253|I3L253_HUMAN	Heat shock protein 75 kDa, mitochondrial (Fragment) OS=Homo sapiens OX=9606 GN=TRAP1 PE=1 SV=1	HUMAN	1
1026	0.1	0.11	42	sp|P12110-3|CO6A2_HUMAN	Isoform 2C2A' of Collagen alpha-2(VI) chain OS=Homo sapiens OX=9606 GN=COL6A2	HUMAN	1
1031	0.1	0.1	28.6	sp|Q9H7Y0-2|DIA1R_HUMAN	Isoform 2 of Deleted in autism-related protein 1 OS=Homo sapiens OX=9606 GN=CXorf36	HUMAN	0
1032	0.1	0.1	23.3	sp|Q96B01|R51A1_HUMAN	RAD51-associated protein 1 OS=Homo sapiens OX=9606 GN=RAD51AP1 PE=1 SV=1	HUMAN	0
1033	0.1	0.1	65.4	sp|P26447|S10A4_HUMAN	Protein S100-A4 OS=Homo sapiens OX=9606 GN=S100A4 PE=1 SV=1	HUMAN	0
1034	0.1	0.1	24.8	tr|F5H8C1|F5H8C1_HUMAN	Protein FAM186A OS=Homo sapiens OX=9606 GN=FAM186A PE=1 SV=1	HUMAN	1
1035	0.1	0.1	34.1	tr|X6R242|X6R242_HUMAN	Polypyrimidine tract-binding protein 3 (Fragment) OS=Homo sapiens OX=9606 GN=PTBP3 PE=1 SV=7	HUMAN	0
1036	0.1	0.1	27.3	tr|A0A0A0MSB9|A0A0A0MSB9_HUMAN	Inactive heparanase-2 OS=Homo sapiens OX=9606 GN=HPSE2 PE=1 SV=1	HUMAN	0
1040	0.09	0.1	32.6	tr|A0A087WZ31|A0A087WZ31_HUMAN	alpha-1,2-Mannosidase OS=Homo sapiens OX=9606 GN=MAN1C1 PE=1 SV=1	HUMAN	0
1044	0.09	0.09	35.3	sp|Q7RTV3-2|ZN367_HUMAN	Isoform 2 of Zinc finger protein 367 OS=Homo sapiens OX=9606 GN=ZNF367	HUMAN	0
1047	0.09	0.09	50.7	tr|F5H0W1|F5H0W1_HUMAN	Probable C-mannosyltransferase DPY19L2 OS=Homo sapiens OX=9606 GN=DPY19L2 PE=1 SV=1	HUMAN	0
1050	0.09	0.09	27.6	sp|O15335|CHAD_HUMAN	Chondroadherin OS=Homo sapiens OX=9606 GN=CHAD PE=1 SV=2	HUMAN	0
1051	0.09	0.09	29.9	sp|Q9NZ01|TECR_HUMAN	Very-long-chain enoyl-CoA reductase OS=Homo sapiens OX=9606 GN=TECR PE=1 SV=1	HUMAN	0
1052	0.09	0.09	35.6	sp|Q15131-5|CDK10_HUMAN	Isoform 5 of Cyclin-dependent kinase 10 OS=Homo sapiens OX=9606 GN=CDK10	HUMAN	0
1054	0.09	0.09	15.3	tr|Q5VTW1|Q5VTW1_HUMAN	A disintegrin and metalloproteinase with thrombospondin motifs 4 OS=Homo sapiens OX=9606 GN=ADAMTS4 PE=1 SV=1	HUMAN	0
1055	0.09	0.09	47.5	tr|I3L385|I3L385_HUMAN	Coiled-coil domain-containing protein 137 (Fragment) OS=Homo sapiens OX=9606 GN=CCDC137 PE=4 SV=1	HUMAN	0
1057	0.08	127.45	81.8	tr|F5GZ08|F5GZ08_HUMAN	Amyloid-like protein 1 OS=Homo sapiens OX=9606 GN=APLP1 PE=1 SV=1	HUMAN	237
1058	0.08	10.62	71.5	sp|P63267-2|ACTH_HUMAN	Isoform 2 of Actin, gamma-enteric smooth muscle OS=Homo sapiens OX=9606 GN=ACTG2	HUMAN	19
1059	0.08	5.54	48.4	sp|Q9NRN5-3|OLFL3_HUMAN	Isoform 3 of Olfactomedin-like protein 3 OS=Homo sapiens OX=9606 GN=OLFML3	HUMAN	6
1060	0.08	1.05	27.5	sp|Q9NZ08|ERAP1_HUMAN	Endoplasmic reticulum aminopeptidase 1 OS=Homo sapiens OX=9606 GN=ERAP1 PE=1 SV=3	HUMAN	2
1062	0.08	0.08	47.7	tr|A6NF31|A6NF31_HUMAN	Oral-facial-digital syndrome 1 protein OS=Homo sapiens OX=9606 GN=OFD1 PE=1 SV=1	HUMAN	1
1063	0.08	0.08	38.7	sp|Q96RS0|TGS1_HUMAN	Trimethylguanosine synthase OS=Homo sapiens OX=9606 GN=TGS1 PE=1 SV=3	HUMAN	1
1064	0.08	0.08	31.7	sp|A6NCI4-2|VWA3A_HUMAN	Isoform 2 of von Willebrand factor A domain-containing protein 3A OS=Homo sapiens OX=9606 GN=VWA3A	HUMAN	1
1065	0.08	0.08	41	sp|Q99728-3|BARD1_HUMAN	Isoform beta of BRCA1-associated RING domain protein 1 OS=Homo sapiens OX=9606 GN=BARD1	HUMAN	0
1066	0.08	0.08	33.7	sp|P09622-2|DLDH_HUMAN	Isoform 2 of Dihydrolipoyl dehydrogenase, mitochondrial OS=Homo sapiens OX=9606 GN=DLD	HUMAN	0
1068	0.08	0.08	24.9	sp|Q08426-2|ECHP_HUMAN	Isoform 2 of Peroxisomal bifunctional enzyme OS=Homo sapiens OX=9606 GN=EHHADH	HUMAN	0
1071	0.08	0.08	55.6	sp|O14513-3|NCKP5_HUMAN	Isoform 3 of Nck-associated protein 5 OS=Homo sapiens OX=9606 GN=NCKAP5	HUMAN	0
1072	0.08	0.08	45.1	tr|C9JHV9|C9JHV9_HUMAN	Protein-tyrosine kinase 2-beta (Fragment) OS=Homo sapiens OX=9606 GN=PTK2B PE=1 SV=1	HUMAN	0
1075	0.08	0.08	20.8	tr|H7C0E3|H7C0E3_HUMAN	Glutamine-rich protein 2 (Fragment) OS=Homo sapiens OX=9606 GN=QRICH2 PE=1 SV=1	HUMAN	0
1076	0.08	0.08	42.9	tr|A0A286YFG8|A0A286YFG8_HUMAN	Arf-GAP with SH3 domain, ANK repeat and PH domain-containing protein 2 (Fragment) OS=Homo sapiens OX=9606 GN=ASAP2 PE=1 SV=1	HUMAN	0
1079	0.08	0.08	23.6	sp|Q9UKT7|FBXL3_HUMAN	F-box/LRR-repeat protein 3 OS=Homo sapiens OX=9606 GN=FBXL3 PE=1 SV=1	HUMAN	0
1081	0.08	0.08	23.6	sp|Q8NGY0|O10X1_HUMAN	Olfactory receptor 10X1 OS=Homo sapiens OX=9606 GN=OR10X1 PE=3 SV=2	HUMAN	0
1082	0.08	0.08	22.8	tr|V9GZ72|V9GZ72_HUMAN	Zinc phosphodiesterase ELAC protein 2 OS=Homo sapiens OX=9606 GN=ELAC2 PE=1 SV=1	HUMAN	0
1084	0.08	0.08	57.9	tr|V9GYJ1|V9GYJ1_HUMAN	Zinc finger protein 438 OS=Homo sapiens OX=9606 GN=ZNF438 PE=4 SV=1	HUMAN	0
1085	0.07	2.48	66.1	sp|O95678|K2C75_HUMAN	Keratin, type II cytoskeletal 75 OS=Homo sapiens OX=9606 GN=KRT75 PE=1 SV=2	HUMAN	5
1086	0.07	2.1	42.1	tr|A0A0A0MSI0|A0A0A0MSI0_HUMAN	Peroxiredoxin-1 (Fragment) OS=Homo sapiens OX=9606 GN=PRDX1 PE=1 SV=1	HUMAN	1
1088	0.07	0.07	63.2	tr|A0A087WYQ2|A0A087WYQ2_HUMAN	Uncharacterized protein C6orf10 OS=Homo sapiens OX=9606 GN=C6orf10 PE=1 SV=1	HUMAN	0
1089	0.07	0.07	35.9	sp|Q8WUM4|PDC6I_HUMAN	Programmed cell death 6-interacting protein OS=Homo sapiens OX=9606 GN=PDCD6IP PE=1 SV=1	HUMAN	1
1090	0.07	0.07	44	tr|A8MZ87|A8MZ87_HUMAN	Kinesin light chain 2 OS=Homo sapiens OX=9606 GN=KLC2 PE=1 SV=1	HUMAN	0
1094	0.07	0.07	51.2	tr|E9PMD8|E9PMD8_HUMAN	26S proteasome regulatory subunit 6A (Fragment) OS=Homo sapiens OX=9606 GN=PSMC3 PE=1 SV=9	HUMAN	0
1095	0.07	0.07	38.3	sp|Q01105-2|SET_HUMAN	Isoform 2 of Protein SET OS=Homo sapiens OX=9606 GN=SET	HUMAN	0
1097	0.07	0.07	25.6	sp|Q5XXA6-3|ANO1_HUMAN	Isoform 3 of Anoctamin-1 OS=Homo sapiens OX=9606 GN=ANO1	HUMAN	0
1101	0.07	0.07	24.4	tr|H0YLG5|H0YLG5_HUMAN	Regulator of microtubule dynamics protein 3 (Fragment) OS=Homo sapiens OX=9606 GN=RMDN3 PE=1 SV=1	HUMAN	0
1102	0.07	0.07	21.4	sp|O75792|RNH2A_HUMAN	Ribonuclease H2 subunit A OS=Homo sapiens OX=9606 GN=RNASEH2A PE=1 SV=2	HUMAN	0
1105	0.07	0.07	24.3	tr|H0YAK1|H0YAK1_HUMAN	G-rich sequence factor 1 (Fragment) OS=Homo sapiens OX=9606 GN=GRSF1 PE=1 SV=1	HUMAN	0
1106	0.07	0.07	61.7	sp|Q53S33|BOLA3_HUMAN	BolA-like protein 3 OS=Homo sapiens OX=9606 GN=BOLA3 PE=1 SV=1	HUMAN	0
1107	0.07	0.07	25.2	tr|E9PCT8|E9PCT8_HUMAN	Alpha-sarcoglycan OS=Homo sapiens OX=9606 GN=SGCA PE=1 SV=1	HUMAN	0
1108	0.07	0.07	48.2	sp|Q96M19|CL067_HUMAN	Putative transmembrane protein encoded by LINC00477 OS=Homo sapiens OX=9606 GN=LINC00477 PE=5 SV=1	HUMAN	0
1109	0.07	0.07	8.9	tr|H0YDF6|H0YDF6_HUMAN	NHS-like protein 1 (Fragment) OS=Homo sapiens OX=9606 GN=NHSL1 PE=1 SV=1	HUMAN	0
1110	0.07	0.07	56.4	tr|H0Y9L1|H0Y9L1_HUMAN	E3 ubiquitin-protein ligase NEDD4 (Fragment) OS=Homo sapiens OX=9606 GN=NEDD4 PE=4 SV=1	HUMAN	0
1112	0.07	0.07	6.3	sp|A0A075B6X5|TVA18_HUMAN	T cell receptor alpha variable 18 OS=Homo sapiens OX=9606 GN=TRAV18 PE=3 SV=1	HUMAN	0
1113	0.06	2.08	67.7	tr|H0Y9Q7|H0Y9Q7_HUMAN	Calnexin (Fragment) OS=Homo sapiens OX=9606 GN=CANX PE=1 SV=1	HUMAN	2
1115	0.06	0.09	13.2	sp|P06312|KV401_HUMAN	Immunoglobulin kappa variable 4-1 OS=Homo sapiens OX=9606 GN=IGKV4-1 PE=1 SV=1	HUMAN	1
1123	0.06	0.06	34	sp|O94991-2|SLIK5_HUMAN	Isoform 2 of SLIT and NTRK-like protein 5 OS=Homo sapiens OX=9606 GN=SLITRK5	HUMAN	0
1124	0.06	0.06	71.1	tr|B7ZBA0|B7ZBA0_HUMAN	THO complex subunit 2 (Fragment) OS=Homo sapiens OX=9606 GN=THOC2 PE=1 SV=1	HUMAN	0
1127	0.06	0.06	38	sp|Q1X8D7-3|LRC36_HUMAN	Isoform 3 of Leucine-rich repeat-containing protein 36 OS=Homo sapiens OX=9606 GN=LRRC36	HUMAN	1
1128	0.06	0.06	32.1	sp|O95671-2|ASML_HUMAN	Isoform 2 of N-acetylserotonin O-methyltransferase-like protein OS=Homo sapiens OX=9606 GN=ASMTL	HUMAN	0
1129	0.06	0.06	58.3	sp|Q8IXL6-2|FA20C_HUMAN	Isoform 2 of Extracellular serine/threonine protein kinase FAM20C OS=Homo sapiens OX=9606 GN=FAM20C	HUMAN	1
1130	0.06	0.06	34.3	sp|A4D1P6-3|WDR91_HUMAN	Isoform 3 of WD repeat-containing protein 91 OS=Homo sapiens OX=9606 GN=WDR91	HUMAN	0
1133	0.06	0.06	34.9	tr|I3L4M5|I3L4M5_HUMAN	Centrosomal protein of 131 kDa (Fragment) OS=Homo sapiens OX=9606 GN=CEP131 PE=1 SV=1	HUMAN	0
1134	0.06	0.06	39	sp|P39905-3|GDNF_HUMAN	Isoform 3 of Glial cell line-derived neurotrophic factor OS=Homo sapiens OX=9606 GN=GDNF	HUMAN	0
1137	0.06	0.06	33.6	tr|H7C452|H7C452_HUMAN	ATP-dependent RNA helicase DDX18 (Fragment) OS=Homo sapiens OX=9606 GN=DDX18 PE=1 SV=1	HUMAN	0
1142	0.06	0.06	50.9	tr|H0YDW1|H0YDW1_HUMAN	Serine/threonine-protein phosphatase 6 regulatory subunit 3 (Fragment) OS=Homo sapiens OX=9606 GN=PPP6R3 PE=1 SV=1	HUMAN	0
1144	0.06	0.06	36.8	tr|E5RJS1|E5RJS1_HUMAN	Protein EFR3 homolog A (Fragment) OS=Homo sapiens OX=9606 GN=EFR3A PE=1 SV=1	HUMAN	0
1147	0.06	0.06	85.2	tr|V9GYN9|V9GYN9_HUMAN	Structural maintenance of chromosomes protein 1A OS=Homo sapiens OX=9606 GN=SMC1A PE=1 SV=1	HUMAN	0
1148	0.06	0.06	24.2	tr|A0A1W2PNG4|A0A1W2PNG4_HUMAN	Family with sequence similarity 230 member A (Fragment) OS=Homo sapiens OX=9606 GN=FAM230A PE=4 SV=1	HUMAN	0
1149	0.06	0.06	46.2	sp|Q16627|CCL14_HUMAN	C-C motif chemokine 14 OS=Homo sapiens OX=9606 GN=CCL14 PE=1 SV=1	HUMAN	0
1151	0.05	31.47	75	sp|O94856-10|NFASC_HUMAN	Isoform 10 of Neurofascin OS=Homo sapiens OX=9606 GN=NFASC	HUMAN	33
1152	0.05	2.08	34.8	tr|U3KQI3|U3KQI3_HUMAN	Plastin-3 (Fragment) OS=Homo sapiens OX=9606 GN=PLS3 PE=1 SV=1	HUMAN	1
1153	0.05	2.07	28.3	sp|P48741|HSP77_HUMAN	Putative heat shock 70 kDa protein 7 OS=Homo sapiens OX=9606 GN=HSPA7 PE=5 SV=2	HUMAN	1
1154	0.05	0.98	36.6	tr|H0Y943|H0Y943_HUMAN	Amyloid-beta A4 precursor protein-binding family B member 2 (Fragment) OS=Homo sapiens OX=9606 GN=APBB2 PE=1 SV=1	HUMAN	1
1155	0.05	0.06	40.1	sp|P48788|TNNI2_HUMAN	Troponin I, fast skeletal muscle OS=Homo sapiens OX=9606 GN=TNNI2 PE=1 SV=2	HUMAN	0
1156	0.05	0.05	43.8	sp|Q9BXX2|AN30B_HUMAN	Ankyrin repeat domain-containing protein 30B OS=Homo sapiens OX=9606 GN=ANKRD30B PE=2 SV=3	HUMAN	1
1157	0.05	0.05	30.3	sp|Q9NTI5|PDS5B_HUMAN	Sister chromatid cohesion protein PDS5 homolog B OS=Homo sapiens OX=9606 GN=PDS5B PE=1 SV=1	HUMAN	1
1160	0.05	0.05	34.3	sp|Q8TE76-2|MORC4_HUMAN	Isoform 2 of MORC family CW-type zinc finger protein 4 OS=Homo sapiens OX=9606 GN=MORC4	HUMAN	0
1161	0.05	0.05	28.6	sp|Q68CR1-3|SE1L3_HUMAN	Isoform 3 of Protein sel-1 homolog 3 OS=Homo sapiens OX=9606 GN=SEL1L3	HUMAN	1
1164	0.05	0.05	58.1	tr|B4DZ96|B4DZ96_HUMAN	Probable tubulin polyglutamylase TTLL9 OS=Homo sapiens OX=9606 GN=TTLL9 PE=2 SV=1	HUMAN	0
1166	0.05	0.05	26.6	tr|F8VSC5|F8VSC5_HUMAN	SCY1-like protein 2 (Fragment) OS=Homo sapiens OX=9606 GN=SCYL2 PE=1 SV=1	HUMAN	1
1167	0.05	0.05	26.2	tr|A0A087WX12|A0A087WX12_HUMAN	Centrosomal protein kizuna (Fragment) OS=Homo sapiens OX=9606 GN=KIZ PE=1 SV=1	HUMAN	0
1169	0.05	0.05	53.2	tr|U3KQ06|U3KQ06_HUMAN	N-terminal EF-hand calcium-binding protein 3 (Fragment) OS=Homo sapiens OX=9606 GN=NECAB3 PE=1 SV=1	HUMAN	0
1170	0.05	0.05	39	sp|P09758|TACD2_HUMAN	Tumor-associated calcium signal transducer 2 OS=Homo sapiens OX=9606 GN=TACSTD2 PE=1 SV=3	HUMAN	0
1171	0.05	0.05	33.6	sp|Q9C0F1-2|CEP44_HUMAN	Isoform 2 of Centrosomal protein of 44 kDa OS=Homo sapiens OX=9606 GN=CEP44	HUMAN	0
1172	0.05	0.05	36	sp|Q5T089-2|MORN1_HUMAN	Isoform 2 of MORN repeat-containing protein 1 OS=Homo sapiens OX=9606 GN=MORN1	HUMAN	0
1173	0.05	0.05	24.2	sp|O43151-3|TET3_HUMAN	Isoform 3 of Methylcytosine dioxygenase TET3 OS=Homo sapiens OX=9606 GN=TET3	HUMAN	0
1174	0.05	0.05	31.9	tr|H7C213|H7C213_HUMAN	Translation initiation factor IF-2, mitochondrial (Fragment) OS=Homo sapiens OX=9606 GN=MTIF2 PE=1 SV=2	HUMAN	0
1176	0.05	0.05	27.6	tr|I3L0A0|I3L0A0_HUMAN	HCG2044781 OS=Homo sapiens OX=9606 GN=TMEM189-UBE2V1 PE=3 SV=1	HUMAN	0
1177	0.05	0.05	30.8	sp|Q14376|GALE_HUMAN	UDP-glucose 4-epimerase OS=Homo sapiens OX=9606 GN=GALE PE=1 SV=2	HUMAN	0
1178	0.05	0.05	20.1	sp|Q14209|E2F2_HUMAN	Transcription factor E2F2 OS=Homo sapiens OX=9606 GN=E2F2 PE=1 SV=1	HUMAN	0
1179	0.05	0.05	20.4	tr|D6RA40|D6RA40_HUMAN	Microtubule-associated protein 1B (Fragment) OS=Homo sapiens OX=9606 GN=MAP1B PE=1 SV=1	HUMAN	0
1181	0.05	0.05	26	tr|I7HPB4|I7HPB4_HUMAN	Fukutin (Fragment) OS=Homo sapiens OX=9606 GN=FKTN PE=1 SV=1	HUMAN	0
1182	0.05	0.05	21.9	tr|D6RC79|D6RC79_HUMAN	Rho-related BTB domain-containing protein 3 OS=Homo sapiens OX=9606 GN=RHOBTB3 PE=1 SV=1	HUMAN	0
1183	0.05	0.05	26.3	sp|O76021-2|RL1D1_HUMAN	Isoform 2 of Ribosomal L1 domain-containing protein 1 OS=Homo sapiens OX=9606 GN=RSL1D1	HUMAN	0
1185	0.05	0.05	44.1	tr|H7C462|H7C462_HUMAN	BUD13 homolog (Fragment) OS=Homo sapiens OX=9606 GN=BUD13 PE=1 SV=1	HUMAN	0
1186	0.05	0.05	28	tr|H0Y3Q6|H0Y3Q6_HUMAN	Patched domain-containing protein 4 (Fragment) OS=Homo sapiens OX=9606 GN=PTCHD4 PE=4 SV=1	HUMAN	0
1189	0.05	0.05	32.2	sp|Q96E66-6|LRC51_HUMAN	Isoform 6 of Leucine-rich repeat-containing protein 51 OS=Homo sapiens OX=9606 GN=LRTOMT	HUMAN	0
1190	0.05	0.05	31.8	sp|A6NH13|DAS1_HUMAN	Putative uncharacterized protein DNAJC9-AS1 OS=Homo sapiens OX=9606 GN=DNAJC9-AS1 PE=2 SV=2	HUMAN	0
1191	0.05	0.05	39.5	sp|A0A0B4J1V2|HV226_HUMAN	Immunoglobulin heavy variable 2-26 OS=Homo sapiens OX=9606 GN=IGHV2-26 PE=3 SV=1	HUMAN	1

## Sheet: SWAT Peptides
Row	Peak Name	m/z	Ret. Time	Group	LCR_MP_SWATH_n1	LCR_MP_SWATH_n2	LCR_MP_SWATH_n3	LCR_MP_SWATH_n4	LCR_MP_SWATH_n5	LCR_RL_3	LCR_RL_5	LCR_RL_8	LCR_RL_12	LCR_RL_16	LCR_RL_19	LCR_RL_23	LCR_RL_24	LCR_RL_26	LCR_RL_34	LCR_RL_36	LCR_RL_37	LCR_RL_42	LCR_RL_43	LCR_RL_46	LCR_RL_53	LCR_RL_57	LCR_RL_65	LCR_RL_71
1	sp|P01024|CO3_HUMAN.IPIEDGSGEVVLSR.+2	735.894	36.64	sp|P01024|CO3_HUMAN	43838.3	139395	75380.3	143346	124129	1.41446e+06	339734	1.28415e+06	610775	907978	903939	1.13107e+06	3.20941e+06	3.32375e+06	447525	1.08112e+06	1.57346e+06	382861	1.74028e+06	385907	1.61008e+06	2.46923e+06	1.04386e+06	1.76386e+06
2	sp|P01024|CO3_HUMAN.VLLDGVQNPR.+2	555.817	29.6	sp|P01024|CO3_HUMAN	1.06302e+06	295270	256348	450977	830966	2.81253e+06	842297	4.01922e+06	782738	619192	1.71476e+06	4.18272e+06	2.32551e+06	6.23236e+06	969888	2.31322e+06	2864.94	845898	1.75082e+06	2.43858e+06	1.23533e+06	3.88542e+06	3.22735e+06	3.19633e+06
3	sp|P01024|CO3_HUMAN.VVLVAVDK.+2	421.771	29.02	sp|P01024|CO3_HUMAN	901864	526781	466500	757464	672239	2.22615e+06	248583	3.08031e+06	1.34097e+06	1.56053e+06	1.49688e+06	2.86116e+06	3.36669e+06	4.48006e+06	908426	1.91816e+06	2.3597e+06	1.24787e+06	2.261e+06	1.63935e+06	2.00649e+06	3.05391e+06	2.19069e+06	2.243e+06
4	sp|P01024|CO3_HUMAN.DFDFVPPVVR.+2	595.814	50.35	sp|P01024|CO3_HUMAN	278731	856431	368228	653406	650927	5.26474e+06	149207	8.58306e+06	4.69449e+06	1.06583e+06	5.39299e+06	6.48712e+06	9.7977e+06	1.26884e+07	1.78689e+06	5.14954e+06	8840.5	3.14377e+06	5.75544e+06	3.78084e+06	6.70691e+06	1.04985e+07	4.57757e+06	6.35072e+06
5	sp|P01024|CO3_HUMAN.VTIKPAPETEK.+3	404.899	17.18	sp|P01024|CO3_HUMAN	380117	255758	218752	262531	271407	532716	47784.6	930424	492782	493298	411362	454675	512287	795827	221311	637511	703538	227893	414739	262015	408097	632191	466686	560936
6	sp|P01024|CO3_HUMAN.SSLSVPYVIVPLK.+2	701.421	51.27	sp|P01024|CO3_HUMAN	213508	188261	131775	158871	147758	974112	264012	1.12962e+06	601086	1.25147e+06	713995	658144	1.67577e+06	1.12201e+06	169766	780724	533.097	128912	1.1772e+06	388533	948061	1.5193e+06	208841	922678
7	sp|P01024|CO3_HUMAN.LESEETMVLEAHDAQGDVPVTVTVHDFPGK.+4	813.395	44.2	sp|P01024|CO3_HUMAN	152214	100438	78525.3	121011	82668	100675	10090.6	254305	193181	87586.8	275998	361004	392250	592819	32172.7	79136.1	250514	68332.3	218230	133907	277990	412310	365408	255998
8	sp|P01024|CO3_HUMAN.ENEGFTVTAEGK.+2	641.302	25.48	sp|P01024|CO3_HUMAN	328639	210327	163272	232793	258166	853830	77982.4	1.49931e+06	690525	105679	485682	752604	616545	1.26951e+06	164896	596363	687549	321454	452937	493097	505410	973970	591672	629617
9	sp|P01024|CO3_HUMAN.VPVAVQGEDTVQSLTQGDGVAK.+2	1099.57	41.08	sp|P01024|CO3_HUMAN	59755.4	40371.5	31005.1	49255.3	44992.6	159136	27398.9	221599	98498	137622	122784	230190	320351	427115	35281.9	103160	191033	53696.9	202906	83682.7	182726	349592	191378	188979
10	sp|P01024|CO3_HUMAN.VFLDC[CAM]C[CAM]NYITELR.+2	851.9	54.53	sp|P01024|CO3_HUMAN	2146.88	59748.8	1438.08	50690	66340.3	1.61284e+06	146985	2.35381e+06	849355	421530	734177	1.06467e+06	1.71542e+06	2.24411e+06	290633	1.1507e+06	16825.9	350324	1.6568e+06	638869	1.21933e+06	2.22148e+06	11631.3	1.30019e+06
11	sp|P02768|ALBU_HUMAN.LVNEVTEFAK.+2	575.311	33.85	sp|P02768|ALBU_HUMAN	2.25251e+06	3.20068e+06	1.24594e+06	3.26599e+06	2.2825e+06	1.05281e+07	2.21907e+06	4.45031e+06	2.41229e+06	1.95235e+07	3.38995e+06	3.03635e+06	4.47798e+06	6.59695e+06	2.36764e+06	6.01284e+06	3.20132e+06	1.73774e+06	6.15047e+06	2.13063e+06	1.64236e+06	2.43877e+06	3.60976e+06	3.11534e+06
12	sp|P02768|ALBU_HUMAN.VPQVSTPTLVEVSR.+2	756.425	38.53	sp|P02768|ALBU_HUMAN	253942	568624	171104	600186	721487	7.62863e+06	1.81884e+06	2.44664e+06	660838	6.51785e+06	996359	2.25821e+06	2.11744e+06	3.88012e+06	312418	3.15185e+06	1.18392e+06	1.66464e+06	2.38429e+06	1.59749e+06	276249	3.9974e+06	1.50015e+06	1.30504e+06
13	sp|P02768|ALBU_HUMAN.FQNALLVR.+2	480.785	33.45	sp|P02768|ALBU_HUMAN	400153	1.46809e+06	368803	1.32737e+06	786185	9.58574e+06	1.49986e+06	3.92034e+06	1.53187e+06	111736	2.80285e+06	2.23039e+06	4.42514e+06	6.47908e+06	1.89618e+06	5.25971e+06	3.15455e+06	847869	6.02809e+06	758445	1.13225e+06	1.46196e+06	1.54691e+06	2.1525e+06
14	sp|P02768|ALBU_HUMAN.VFDEFKPLVEEPQNLIK.+3	682.37	50.33	sp|P02768|ALBU_HUMAN	2.11149e+06	2.98821e+06	1.26358e+06	3.02439e+06	2.21393e+06	9.6036e+06	1.63596e+06	4.56842e+06	2.78733e+06	537697	3.79918e+06	3.89121e+06	3.55159e+06	6.70662e+06	2.04116e+06	5.67736e+06	779.844	1.92866e+06	6.35018e+06	2.38639e+06	1.28585e+06	2.13878e+06	2.81847e+06	2.98401e+06
15	sp|P02768|ALBU_HUMAN.AVMDDFAAFVEK.+2	671.821	50.31	sp|P02768|ALBU_HUMAN	1.15914e+06	1.35997e+06	595196	1.69682e+06	1.03579e+06	3.59673e+06	47205.9	889137	1.11102e+06	2.38122e+06	1.64581e+06	2.00537e+06	276917	2.06067e+06	99060.2	620735	887.851	1.22566e+06	636557	1.17416e+06	264114	397863	1.49018e+06	601543
16	sp|P02768|ALBU_HUMAN.AEFAEVSK.+2	440.724	20.34	sp|P02768|ALBU_HUMAN	1.81043e+06	2.17617e+06	1.04964e+06	2.331e+06	1.9213e+06	4.91622e+06	1.46422e+06	2.44172e+06	1.59331e+06	1.07738e+07	1.24151e+06	1.54049e+06	1.6767e+06	2.63691e+06	1.12972e+06	2.97136e+06	1.3069e+06	1.11554e+06	2.7306e+06	992415	523268	784190	1.73644e+06	1.56162e+06
17	sp|P02768|ALBU_HUMAN.LVAASQAALGL.+2	507.303	43.92	sp|P02768|ALBU_HUMAN	1.16519e+06	1.53614e+06	600005	1.48508e+06	1.04253e+06	6.60802e+06	1.17584e+06	2.80957e+06	1.28102e+06	1.31272e+07	1.91212e+06	2.45872e+06	2.80662e+06	4.57129e+06	1.01692e+06	3.41216e+06	2.09446e+06	699419	4.37761e+06	1.17294e+06	737121	1.30342e+06	1.32061e+06	1.37258e+06
18	sp|P02768|ALBU_HUMAN.TYETTLEK.+2	492.748	19.9	sp|P02768|ALBU_HUMAN	1.35212e+06	1.54041e+06	630772	1.66958e+06	1.32159e+06	3.28828e+06	5443.74	20903.7	921209	3.969e+06	1.06686e+06	505151	509128	1.12671e+06	572901	1.82713e+06	14789.1	43071.5	1.01778e+06	513701	203692	395404	816962	783677
19	sp|P02768|ALBU_HUMAN.KVPQVSTPTLVEVSR.+3	547.317	34.21	sp|P02768|ALBU_HUMAN	985705	2.47125e+06	714365	2.09894e+06	1.21544e+06	1.05654e+07	926174	4.56189e+06	2.27292e+06	3.24765e+07	3.6782e+06	2.51332e+06	1.03723e+07	6.75431e+06	1.7316e+06	6.34564e+06	2.53513e+06	72314.8	5.59084e+06	196581	1.43683e+06	1.39609e+07	2.25292e+06	2.10322e+06
20	sp|P02768|ALBU_HUMAN.DLGEENFK.+2	476.224	25.39	sp|P02768|ALBU_HUMAN	1.70578e+06	2.0767e+06	953178	2.26627e+06	1.96316e+06	5.37719e+06	1.26805e+06	2.6742e+06	1.58264e+06	4.2817e+06	1.87184e+06	1.83793e+06	1.66496e+06	3.18068e+06	1.2851e+06	2.90588e+06	1.5139e+06	1.42025e+06	2.34935e+06	1.38986e+06	679863	1.0069e+06	2.31637e+06	1.65003e+06
21	sp|P0C0L4|CO4A_HUMAN.AIADVTLLSGFHALR.+3	528.635	49.39	sp|P0C0L4|CO4A_HUMAN	21875.3	69932.9	87062.1	61306.2	82895.3	482867	1133.15	643006	212228	34162.6	475531	709384	406738	1.57611e+06	74894	367987	38492.1	142139	253985	132429	409118	444069	294286	561420
22	sp|P0C0L4|CO4A_HUMAN.AIADVTLLSGFHAL.+2	714.398	56.87	sp|P0C0L4|CO4A_HUMAN	182896	65015.5	161075	105637	129397	80822.7	2473.55	150196	106521	1095.77	46070.4	370863	2288.86	97626.9	4800.52	20211.7	94.4259	32963.2	57704.8	116184	41102.8	107689	129821	14549
23	sp|P0C0L4|CO4A_HUMAN.VHYTVC[CAM]IWR.+2	617.313	42.19	sp|P0C0L4|CO4A_HUMAN	16095.7	18855	66727.7	7859.75	164660	26388	10734.2	10043.9	46163.8	187175	22350.7	27662.8	7331.84	22385.1	17618.8	11884.5	53247	24327.9	14268.7	27717	81506.3	28290.6	2168.58	45636.6
24	sp|P0C0L4|CO4A_HUMAN.APVDLLGVAHNNLMAM.+2	833.426	55.02	sp|P0C0L4|CO4A_HUMAN	20550.7	1185.08	26840.5	22862.9	19753.1	9147.8	88946.3	3376.71	1531.7	119876	16141.5	16487.4	113124	12422.7	2595.07	3011.1	186.711	2997.96	47734.7	2537.31	3356.77	10140.3	32558.9	5155.82
25	sp|P0C0L4|CO4A_HUMAN.APVDLLGVAHNNLM.+2	732.387	42.9	sp|P0C0L4|CO4A_HUMAN	14529.8	3892.14	10623.5	14895.2	1453.34	3258.7	2695.1	6475.09	1593.45	6262.36	8730	19982.3	3306.77	5551.38	2467.11	6522.47	3336.87	1648.27	4544.94	2002.28	542.573	11014.4	10711.3	4065.49
26	sp|P0C0L4|CO4A_HUMAN.LQETSNWLLSQQQADGSFQDPC[CAM]PVLDR.+3	1044.83	50.28	sp|P0C0L4|CO4A_HUMAN	46839.2	29804.5	28893.3	31153	29638.2	50526.1	1701.91	47463	16600.1	18805.5	35490.9	48268.6	36642.9	29295.5	4188.77	17064.6	6288.47	3999.11	33773.1	10673.4	16689.8	4674.87	22978.2	8817.99
27	sp|P0C0L4|CO4A_HUMAN.AIADVTLLSGFH.+2	622.338	49.98	sp|P0C0L4|CO4A_HUMAN	47520.6	24307.5	42738.5	38181.4	55463.8	33819.7	4511.02	62018.6	49570.4	8084.37	59356.5	368483	5835.81	257553	9706.26	21041.7	13579	164857	6465.25	115217	40889.2	47762.2	146840	111819
28	sp|P0C0L4|CO4A_HUMAN.VGLSGMAIADVTLLSGFHALR.+3	710.058	58.09	sp|P0C0L4|CO4A_HUMAN	11122.4	18707.9	22606.9	8521.48	17369.2	155563	11902.7	107811	5255.39	238790	65341.5	56662.5	495412	273204	11131.8	79152.2	0	1817	202326	6786.86	138377	98382.4	10298.3	42829
29	sp|P0C0L4|CO4A_HUMAN.APVDLLGVAHNNL.+2	666.867	35.51	sp|P0C0L4|CO4A_HUMAN	1077.81	5783.18	8073.66	14392.2	16668.2	23497.3	15117.5	6281.61	28651	289.805	31032.8	78651.6	30679	56620.9	1790.9	16827.8	5582.51	23222.8	27970.8	24608.4	3816.2	1845.08	26412.3	17738.2
30	sp|P01019|ANGT_HUMAN.SLDFTELDVAAEK.+2	719.359	45.25	sp|P01019|ANGT_HUMAN	2.29332e+06	3.07701e+06	2.10288e+06	2.06144e+06	2.57717e+06	2.44175e+06	1.40278e+06	3.68363e+06	4.28502e+06	1.45697e+06	4.67061e+06	5.39471e+06	3.8967e+06	5.809e+06	1.48945e+06	1.94244e+06	2.42113e+06	1.7947e+06	3.30264e+06	2.71508e+06	3.63989e+06	4.32414e+06	3.49144e+06	3.13636e+06
31	sp|P01019|ANGT_HUMAN.DPTFIPAPIQAK.+2	649.361	41.93	sp|P01019|ANGT_HUMAN	2.79911e+06	3.7569e+06	2.57218e+06	2.62165e+06	3.37953e+06	3.23048e+06	3.00479e+06	4.33866e+06	4.43751e+06	2.04886e+06	5.75179e+06	7.38004e+06	6.44392e+06	9.07071e+06	2.37934e+06	3.03212e+06	3.96273e+06	2.46771e+06	5.07418e+06	3.45686e+06	4.8915e+06	5.44598e+06	4.55619e+06	4.12635e+06
32	sp|P01019|ANGT_HUMAN.ALQDQLVLVAAK.+2	634.882	41.61	sp|P01019|ANGT_HUMAN	1.60501e+06	2.31088e+06	1.55653e+06	1.54087e+06	1.81226e+06	2.10422e+06	1.15619e+06	3.01423e+06	2.82739e+06	1.32469e+06	3.38505e+06	3.91557e+06	3.81328e+06	5.39852e+06	1.53285e+06	1.87866e+06	2.43574e+06	1.11573e+06	3.20459e+06	1.87722e+06	2.8832e+06	3.3073e+06	2.51909e+06	2.72379e+06
33	sp|P01019|ANGT_HUMAN.LQAILGVPWK.+2	562.845	48.08	sp|P01019|ANGT_HUMAN	1.83456e+06	2.21928e+06	1.6063e+06	1.36937e+06	1.49108e+06	2.06662e+06	286278	2.36427e+06	2.06367e+06	452538	2.54828e+06	3.08489e+06	2.77109e+06	4.44527e+06	1.36449e+06	1.50249e+06	5862.73	1.32317e+06	1.39753e+06	1.87146e+06	2.63694e+06	3.08065e+06	2.39843e+06	2.22546e+06
34	sp|P01019|ANGT_HUMAN.ALYTPVVLPR.+2	564.842	54.45	sp|P01019|ANGT_HUMAN	40100.6	5.25905e+06	3.69665e+06	3.98623e+06	5.08243e+06	2.70918e+06	141115	5.13759e+06	5.72035e+06	29330.6	6.22279e+06	9.63817e+06	2.04706e+06	1.06685e+07	1.8931e+06	2.23775e+06	1.34124e+06	3.50942e+06	2.07085e+06	5.91298e+06	3.95905e+06	5.24629e+06	4.84488e+06	5.52756e+06
35	sp|P01019|ANGT_HUMAN.VLSALQAVQGLLVAQGR.+3	575.012	57.89	sp|P01019|ANGT_HUMAN	1.28807e+06	2.17919e+06	1.43295e+06	1.23016e+06	41368.2	3.24391e+06	417222	4.97951e+06	4.30426e+06	1.91288e+06	5.13505e+06	5.77689e+06	5.48485e+06	8.49029e+06	2.0123e+06	2.51949e+06	185.41	776469	3.76665e+06	1.89955e+06	3.90464e+06	4.8707e+06	2.30021e+06	3.56282e+06
36	sp|P01019|ANGT_HUMAN.TIHLTMPQLVLQGSYDLQDLLAQAELPAILHTELNLQK.+4	1067.83	61.27	sp|P01019|ANGT_HUMAN	73858.4	35518.6	33847.4	22595.7	33718.5	182980	13199.5	153982	34091	43628.6	6263.77	318155	296143	474752	5723.42	12506	0	14492.8	50558	13554.8	84019.6	101295	166169	85464.8
37	sp|P01019|ANGT_HUMAN.AVYDQSATALHFLGR.+3	550.286	54.78	sp|P01019|ANGT_HUMAN	1256.45	218119	84916.9	134116	109264	454643	4912.52	754149	590767	2379.75	1.40694e+06	1.10566e+06	842566	2.00502e+06	391267	493020	479155	203595	493747	225300	815380	802184	784826	895127
38	sp|P01019|ANGT_HUMAN.VEGLTFQQN.+2	518.259	34.65	sp|P01019|ANGT_HUMAN	312903	368262	212300	282132	356292	260703	59640.2	630140	480061	4400.97	505119	848442	273747	1.10526e+06	136053	188233	135065	160871	214918	279673	496011	483078	296599	226419
39	sp|P01019|ANGT_HUMAN.ADSQAQLLLSTVVGVFTAPGLHLK.+3	822.464	60.41	sp|P01019|ANGT_HUMAN	338915	782803	291809	354848	483787	619627	237350	1.4236e+06	712860	867849	1.05056e+06	972451	1.34554e+06	2.37268e+06	604501	647523	0	270672	977302	400611	1.36491e+06	1.71037e+06	701126	1.33908e+06
40	sp|P00450|CERU_HUMAN.GAYPLSIEPIGVR.+2	686.385	44.86	sp|P00450|CERU_HUMAN	394245	1.18337e+06	757716	745703	313256	2.3421e+06	214169	2.83016e+06	606097	1.10632e+06	1.06974e+06	1.63492e+06	4.47609e+06	6.0912e+06	423690	1.22291e+06	2.47223e+06	196393	1.84846e+06	603074	1.93692e+06	2.97741e+06	649709	1.47592e+06
41	sp|P00450|CERU_HUMAN.ALYLQYTDETFR.+2	760.375	42.67	sp|P00450|CERU_HUMAN	158920	632007	464235	478179	278821	1.62843e+06	106842	2.09758e+06	345200	482901	917519	1.20334e+06	2.22978e+06	4.54315e+06	438576	882681	1.50982e+06	331557	1.14032e+06	629597	1.5168e+06	1.89745e+06	1.06115e+06	1.34048e+06
42	sp|P00450|CERU_HUMAN.LISVDTEHSNIYLQNGPDR.+3	724.362	36.19	sp|P00450|CERU_HUMAN	390701	552227	446537	412897	281074	1.01032e+06	51677.4	1.23406e+06	290024	261145	424654	895312	1.29709e+06	2.2331e+06	137726	459814	797211	151227	569539	392631	608239	1.0714e+06	810443	662817
43	sp|P00450|CERU_HUMAN.KAEEEHLGILGPQLHADVGDK.+4	564.796	32.42	sp|P00450|CERU_HUMAN	285658	470718	348711	337541	196081	426336	20033.4	592962	87925.8	103351	119006	323561	656613	1.03451e+06	71711.4	210819	373877	7857.47	286542	48690.3	375661	610076	457086	302348
44	sp|P00450|CERU_HUMAN.VNKDDEEFIESNK.+3	522.914	22.2	sp|P00450|CERU_HUMAN	538736	801412	649573	675076	403303	636182	47729.9	485146	205275	160445	478020	485394	1.04602e+06	1.54473e+06	350561	375221	810784	155622	474761	256961	546198	736621	632295	543630
45	sp|P00450|CERU_HUMAN.DIFTGLIGPMK.+2	596.326	53.93	sp|P00450|CERU_HUMAN	306242	1.03798e+06	755011	431293	270862	658417	21405.9	449001	323271	70606.3	921287	597411	630355	1.35908e+06	41938.8	164014	882.587	147142	395601	318706	601687	631116	435243	225081
46	sp|P00450|CERU_HUMAN.GPEEEHLGILGPVIWAEVGDTIR.+3	829.768	57.81	sp|P00450|CERU_HUMAN	189142	565751	353553	406940	290528	1.48064e+06	180358	2.38204e+06	496397	502836	468990	1.59458e+06	1.86965e+06	4.63941e+06	381993	684678	0	500440	948909	752273	1.31246e+06	1.90436e+06	856375	1.91921e+06
47	sp|P00450|CERU_HUMAN.GEFYIGSK.+2	450.727	28.02	sp|P00450|CERU_HUMAN	653534	1.02517e+06	786568	832169	521625	1.06945e+06	59840.2	1.46245e+06	433643	80457.4	628914	740082	1.11508e+06	2.30475e+06	246415	585276	758025	208197	459067	456191	872769	1.26502e+06	1.02674e+06	720524
48	sp|P00450|CERU_HUMAN.TTIEKPVWLGFLGPIIK.+3	638.048	57.58	sp|P00450|CERU_HUMAN	169413	319779	289891	136079	83588.7	1.05477e+06	69039.9	1.12436e+06	178068	649046	341847	346975	1.76682e+06	1.89736e+06	140130	546529	243.297	30110.2	917307	187877	612208	1.04784e+06	214733	385865
49	sp|P00450|CERU_HUMAN.DTANLFPQTSLTLH.+2	779.399	47.71	sp|P00450|CERU_HUMAN	313822	391442	295096	325735	200980	368952	1006.81	532463	225474	1631.1	269757	655799	90555.3	1.11918e+06	4513	100674	1861.38	4002.81	17153.1	233555	191124	363161	292855	442127
50	sp|P02766|TTHY_HUMAN.ALGISPFHEHAEVVFTANDSGPR.+4	613.557	39.29	sp|P02766|TTHY_HUMAN	3.96914e+06	2.60852e+06	3.52474e+06	5.20413e+06	3.23071e+06	1.3902e+06	6.0476e+06	2.36186e+06	3.02869e+06	7.307e+06	6.08249e+06	9.92133e+06	1.80732e+07	1.11659e+07	5.08982e+06	1.89877e+06	4.89162e+06	2.14161e+06	7.88612e+06	2.6297e+06	6.49658e+06	6.39583e+06	9.51181e+06	8.07397e+06
51	sp|P02766|TTHY_HUMAN.ALGISPFHEHAEVVFTANDSGPRR.+5	522.267	36.53	sp|P02766|TTHY_HUMAN	24117	10448.1	13489.2	1641.52	20511.4	56500.1	22772.5	5866.42	7581.76	30508.5	266.449	10486.6	80320	819.635	1918.99	1734.57	3954.4	6025.04	18556.4	7088.2	1689.9	1732.89	3489.38	426.59
52	sp|P02766|TTHY_HUMAN.ALGISPFHEHAEVVFTAN.+2	969.989	42.78	sp|P02766|TTHY_HUMAN	68875.1	41203.3	56505.5	195528	115968	6801.39	10285.5	21131.3	21028.3	4254.86	113633	422622	112562	360147	66158.3	6974.97	8457.01	123175	35575	85920.4	86423.6	62271.1	752386	236051
53	sp|P02766|TTHY_HUMAN.ALGISPFHEHAEVVFT.+3	585.302	32.42	sp|P02766|TTHY_HUMAN	915.14	899.31	655.898	9397.33	2048.36	516.441	2916.36	6926.88	3028.03	1215.85	12118.1	178822	7004.38	151466	1004.37	2923.15	1856.41	4021.99	18817.4	2409.2	2122.62	2918.48	58710.9	2844.67
54	sp|P02766|TTHY_HUMAN.HEHAEVVFTANDSGPR.+3	589.28	22.46	sp|P02766|TTHY_HUMAN	413424	205249	404750	1.00817e+06	683235	21059.3	43613.7	76328.5	200530	9938.78	383482	940439	172397	792883	38194.9	29945.4	29302.4	752830	79355.2	431502	178866	163617	3.37799e+06	870165
55	sp|P02766|TTHY_HUMAN.AEVVFTANDSGPR.+2	681.836	28.73	sp|P02766|TTHY_HUMAN	100607	51062.1	91506.4	198988	228334	22494.9	250124	70326.6	149608	4034.57	214811	669106	125459	389548	117934	30313.1	70340.5	758154	78767.4	585725	76197.3	92805.1	1.1043e+06	605139
56	sp|P02766|TTHY_HUMAN.ALGISPFHEHAEVVFTANDSGPRRYTIAALLSPYSYSTTAVVTNPKE.+5	1016.32	48.42	sp|P02766|TTHY_HUMAN	1987.46	4446.16	14590.3	47178.7	18278.4	3778.73	16305.6	13292.2	1155.19	24140.1	2214.82	12846.6	41600.4	19317.6	450.059	1810.76	1405.96	4628	15012.9	7947.13	4159.74	1013.19	26244.7	16286.3
57	sp|P02766|TTHY_HUMAN.GISPFHEHAEVVFTANDSGPRRYTIAALLSPYSYSTTAVVTNPKE.+6	816.414	59.38	sp|P02766|TTHY_HUMAN	329562	50326.2	325507	306877	336658	136995	589.191	1010.8	7125	4716.44	8327.14	143545	115877	136294	2816.05	554.794	0	6667.62	5848.55	3897.53	11476.5	7573.07	353725	158741
58	sp|P02766|TTHY_HUMAN.TKSYWKALGISPFHEHAEVVFTANDSGPRRYTIAALLSPYSYSTTAVVTNPKE.+6	979.336	58.84	sp|P02766|TTHY_HUMAN	27030.4	145988	22903.1	152817	146751	5733.04	53038.2	20255.5	1367.73	15118.9	3157.5	16622.2	30505.2	12103.2	1514.13	12658.6	3187.1	12830.6	9725.89	8985.51	4982.34	3043.2	13227.4	2448.35
59	sp|P02790|HEMO_HUMAN.NFPSPVDAAFR.+2	610.807	41.35	sp|P02790|HEMO_HUMAN	1.10882e+06	95839	63974.5	3.4616e+06	2.30655e+06	8.75452e+06	2.26815e+06	8.54117e+06	4.81177e+06	6.18648e+06	346594	294438	1.59911e+06	197347	3.20441e+06	6.50894e+06	120352	93398.6	380831	4.43749e+06	1.50176e+06	587279	288798	8.40616e+06
60	sp|P02790|HEMO_HUMAN.GGYTLVSGYPK.+2	571.298	32.32	sp|P02790|HEMO_HUMAN	3.21246e+06	2.98876e+06	2.98269e+06	3.48373e+06	2.30976e+06	3.01229e+06	92865.7	4.20387e+06	2.30762e+06	826776	2.17862e+06	4.10657e+06	3.15445e+06	4.50379e+06	1.10139e+06	2.08115e+06	2.0905e+06	1.04991e+06	1.73037e+06	1.91294e+06	2.53647e+06	3.86678e+06	4.32831e+06	2.87465e+06
61	sp|P02790|HEMO_HUMAN.VWVYPPEK.+2	509.274	32.71	sp|P02790|HEMO_HUMAN	1.15053e+07	9.32187e+06	1.02835e+07	1.24311e+07	8.35122e+06	1.49866e+07	1.59104e+06	14762.7	8.70708e+06	426460	5.69905e+06	11107.4	1.51268e+07	27071.6	7295.75	1.01809e+07	3473.87	5932.76	36641.6	9.89009e+06	8.3257e+06	1.52242e+07	1.48845e+07	1.21859e+07
62	sp|P02790|HEMO_HUMAN.LVLSALTSDNHGATY.+2	781.396	41.63	sp|P02790|HEMO_HUMAN	326833	308456	347541	393182	207773	575990	1040.48	1.01351e+06	588573	8083.27	870941	1.6412e+06	1.17082e+06	3.02859e+06	808793	960568	1.74178e+06	241324	1.20201e+06	390115	1.66942e+06	1.82554e+06	965240	1.67765e+06
63	sp|P02790|HEMO_HUMAN.SGAQATWTELPWPHEK.+3	613.3	42.65	sp|P02790|HEMO_HUMAN	2.10056e+06	2.20672e+06	2.02511e+06	2.26703e+06	1.5361e+06	1.32602e+06	133072	1.72819e+06	1.41056e+06	262617	1.07793e+06	2.45755e+06	985934	1.79405e+06	351025	642525	1.14465e+06	505867	1.1337e+06	1.11708e+06	785353	1.43377e+06	2.52794e+06	1.38422e+06
64	sp|P02790|HEMO_HUMAN.YYC[CAM]FQGNQFLR.+2	748.343	52.15	sp|P02790|HEMO_HUMAN	3728.1	1541.74	7270.96	59590.2	18476	1.89128e+06	60751.9	351750	120819	585970	295974	143104	862329	856412	204815	431659	4.63999e+06	19937.3	827999	37275	589382	434927	89203	335933
65	sp|P02790|HEMO_HUMAN.EVGTPHGIILDSVDAAFIC[CAM]PGSSR.+4	625.314	53.07	sp|P02790|HEMO_HUMAN	272879	330844	256678	434236	283781	393267	40231.6	97783.2	219461	318938	766367	106067	601993	1.76905e+06	318818	318355	2673.68	397751	934767	808518	509274	716878	642028	87388.6
66	sp|P02790|HEMO_HUMAN.LVLSALTSDNHGATYAF.+2	890.449	49.96	sp|P02790|HEMO_HUMAN	253255	242770	234886	280165	190472	298564	1387.78	551522	299566	4792.33	300218	481957	64428.3	484934	43415.7	82968.2	147.067	56756	73896.5	161964	171843	270868	194469	546492
67	sp|P02790|HEMO_HUMAN.GIILDSVDAAFIC[CAM]PGSSR.+2	939.475	53.07	sp|P02790|HEMO_HUMAN	430513	552160	475706	795496	474370	2.57286e+06	51798	2.932e+06	1.25543e+06	71669.8	1.11616e+06	1.9561e+06	700534	2.27536e+06	360290	1.00464e+06	238.493	470047	1.20414e+06	873670	1.37824e+06	2.31262e+06	990215	2.05991e+06
68	sp|P02790|HEMO_HUMAN.LLQDEFPGIPSPLDAAVEC[CAM]HR.+3	788.727	51.84	sp|P02790|HEMO_HUMAN	302113	583874	405638	783695	312714	2.44432e+06	47099.3	660973	896232	549796	730004	531096	644247	887286	363735	752523	6998.32	203874	635399	224896	1.11717e+06	1.03193e+06	785590	401525
69	sp|P02751-3|FINC_HUMAN.VDVIPVNLPGEHGQR.+3	543.962	38.21	sp|P02751-3|FINC_HUMAN	122773	104589	70862.2	99190.7	73327.9	508749	85998.3	367757	310143	262171	354383	573240	721925	798163	136410	479000	551211	187894	658486	184554	467674	746630	88954.1	89979.4
70	sp|P02751-3|FINC_HUMAN.PQAPITGYR.+2	501.772	23.91	sp|P02751-3|FINC_HUMAN	7749.51	17322.7	43941.5	59791.7	53975.3	182573	17358.5	260703	203236	16817.6	196114	254370	14910.8	289119	68979.4	121452	116339	94383.9	102219	34688.6	108528	151277	3218.26	100345
71	sp|P02751-3|FINC_HUMAN.NLQPASEYTVSLVAIK.+2	866.978	45.98	sp|P02751-3|FINC_HUMAN	130655	122720	84110.5	103612	73980.8	240112	65714	310598	269041	154545	315709	528951	309829	424687	76094.9	189536	545.353	86481.8	255052	125218	179491	402008	112014	164564
72	sp|P02751-3|FINC_HUMAN.DLQFVEVTDVK.+2	646.84	43.28	sp|P02751-3|FINC_HUMAN	74884.6	77405.7	47132.5	64273.9	56627.5	296492	8426.91	229850	221879	179326	256800	262547	412585	443300	97834	280046	366570	131375	377253	139638	290280	513056	31384.5	79655.6
73	sp|P02751-3|FINC_HUMAN.GLKPGVVYEGQLISIQQYGHQEVTR.+4	700.625	40.87	sp|P02751-3|FINC_HUMAN	9368.71	17107.7	10241.3	11262.1	15193.8	93345.6	894.766	81740.4	25063	527.782	39965.9	139507	223762	181871	454.023	83084.6	83572.4	42976.6	724.871	55801.9	70484.6	175812	22689.6	38943.9
74	sp|P02751-3|FINC_HUMAN.HTSVQTTSSGSGPFTDVR.+3	621.966	25.13	sp|P02751-3|FINC_HUMAN	40683.2	68724.2	37771.9	49847	34008.3	119409	35090.6	158285	149702	102114	188225	280350	197046	219070	40586.6	124632	161488	43968.8	108023	48396.7	103867	209128	67679	91765.4
75	sp|P02751-3|FINC_HUMAN.VVTPLSPPTNLHLEANPDTGVLTVSWER.+3	1014.87	54.02	sp|P02751-3|FINC_HUMAN	27571	23875.4	15944.4	9893.62	11252.9	198529	41301	154263	123385	126989	82669.5	132094	284658	296669	46025.5	126688	447.428	2101.68	177420	656.457	161415	322009	15609.9	21565.6
76	sp|P02751-3|FINC_HUMAN.NTFAEVTGLSPGVTYYFK.+2	997.499	52.7	sp|P02751-3|FINC_HUMAN	18448.4	18151.9	11279.7	12410.9	13842.8	119460	30591.1	85480	69505.5	118583	75043.2	74216.4	150238	118216	13800.9	77847.6	2319.76	31421	130685	42353.1	55373.6	147658	17581	27246.2
77	sp|P02751-3|FINC_HUMAN.DDKESVPISDTIIPAVPPPTDLR.+3	825.771	42.62	sp|P02751-3|FINC_HUMAN	6709.75	1442.65	2160.62	2250.72	7713.12	134586	68359.8	41529.6	44032.4	82155.2	32704.5	2170.62	265849	88840.6	32582	135188	3589.35	5821.88	176228	4459.13	131875	279740	1178.91	4949.68
78	sp|P02751-3|FINC_HUMAN.EATIPGHLNSY.+2	601.296	30.85	sp|P02751-3|FINC_HUMAN	33732.8	33369.7	18992.3	32218.3	26880.8	48670.4	9670.06	67208.5	74970.4	24104.5	63509.4	247182	60068.7	152086	23044.4	14316.9	41625.4	18177.2	48398.2	40810.9	63755.5	107577	35035.4	37429.2
79	sp|P41222|PTGDS_HUMAN.AQGFTEDTIVFLPQTDK.+2	955.481	48.31	sp|P41222|PTGDS_HUMAN	1.63847e+07	9.9616e+06	1.27073e+07	1.62566e+07	1.46893e+07	9.89775e+06	1.11933e+07	1.82694e+07	1.06727e+07	7.84869e+06	1.74193e+07	1.30702e+07	9.50755e+06	2.81663e+07	5.79953e+06	1.18964e+07	170895	1.13399e+07	1.35146e+07	1.56416e+07	1.09135e+07	1.34164e+07	1.41104e+07	1.7016e+07
80	sp|P41222|PTGDS_HUMAN.APEAQVSVQPNFQQDK.+2	893.442	30.12	sp|P41222|PTGDS_HUMAN	3.57234e+06	3.34446e+06	3.12427e+06	3.007e+06	2.13692e+06	7.35773e+06	7.83492e+06	5.90473e+06	3.45641e+06	3.93379e+06	4.86906e+06	7.26709e+06	8.96323e+06	8.58394e+06	1.87992e+06	4.29031e+06	3105.83	903969	8.42574e+06	1.39727e+06	4.02522e+06	4.59035e+06	1.33145e+06	3.80688e+06
81	sp|P41222|PTGDS_HUMAN.TMLLQPAGSLGSYSYR.+2	872.44	43.78	sp|P41222|PTGDS_HUMAN	2.91425e+06	6.7941e+06	4.4655e+06	6.32202e+06	3.82832e+06	6.74982e+06	2.06859e+06	4.0219e+06	3.32168e+06	3.72561e+06	7.28883e+06	4.81044e+06	5.45979e+06	3.19704e+06	80678.9	1.39523e+06	5.0344e+06	1.71612e+06	6.11026e+06	2.97059e+06	1.47882e+06	1.70795e+06	2.41505e+06	3.47068e+06
82	sp|P41222|PTGDS_HUMAN.SPHWGSTYSVSVVETDYDQYALLYSQGSK.+3	1089.84	50.95	sp|P41222|PTGDS_HUMAN	830534	836554	650168	639062	545836	1.17435e+06	399460	1.19173e+06	151814	745473	248515	768178	1.14937e+06	1.17563e+06	88996.3	334887	8130.89	110344	700404	156219	596715	880165	249139	779810
83	sp|P41222|PTGDS_HUMAN.TMLLQPAGSLGSYSY.+2	794.39	51.52	sp|P41222|PTGDS_HUMAN	1.39554e+06	948585	1.04346e+06	1.16276e+06	823424	325082	4693.03	179253	408702	11519.5	309987	959233	30784.5	144872	9010.71	37031.4	818.118	59479.9	1071.62	365090	75834.4	120926	360444	45554.7
84	sp|P41222|PTGDS_HUMAN.TMLLQPAGSLGSY.+2	669.342	49.17	sp|P41222|PTGDS_HUMAN	901552	984359	754230	1.09833e+06	675398	607833	30519.9	412475	842681	15090.1	1.52916e+06	2.01602e+06	882015	1.87392e+06	116997	342121	4100.68	514577	835745	549457	685872	580151	817836	587529
85	sp|P41222|PTGDS_HUMAN.APEAQVSVQPN.+2	570.288	24.38	sp|P41222|PTGDS_HUMAN	2.84056e+06	2.42319e+06	2.15892e+06	2.97531e+06	2.91365e+06	1.99687e+06	728919	2.01149e+06	1.56019e+06	76647.4	1.45553e+06	2.90403e+06	518965	2.56549e+06	490529	1.15888e+06	1.00394e+06	961651	580658	902614	638632	684165	1.34718e+06	1.52809e+06
86	sp|P41222|PTGDS_HUMAN.SVSVVETDYDQYALLYSQGSK.+2	1176.57	47.09	sp|P41222|PTGDS_HUMAN	2.4587e+06	1.95903e+06	1.5587e+06	2.47199e+06	2.00872e+06	1.05043e+06	102376	1.47739e+06	1.58822e+06	63211.3	1.76935e+06	4.72897e+06	1.45037e+06	4.00634e+06	517266	739411	7049.04	737603	1.47027e+06	1.05418e+06	1.22808e+06	1.42522e+06	1.87411e+06	1.74149e+06
87	sp|P41222|PTGDS_HUMAN.SVSVVETDYDQYALL.+2	851.415	54.03	sp|P41222|PTGDS_HUMAN	26721.1	20618.5	22623.9	32083.7	27288	31129.9	46218.8	69369.7	28158	2038.99	48740.3	300092	10490.9	133721	883.085	25099.5	714.676	35421.3	12093.4	50909.6	17248.5	19508.6	179906	82469.6
88	sp|P41222|PTGDS_HUMAN.EAQVSVQPNFQQDK.+2	809.397	28.17	sp|P41222|PTGDS_HUMAN	3.98799e+06	3.69493e+06	2.02793e+06	3.16666e+06	2.26202e+06	3.02526e+06	1.98356e+06	6.58239e+06	5.35466e+06	344609	3.39743e+06	5.49999e+06	1.55639e+06	5.01213e+06	246973	1.90787e+06	3.10967e+06	466264	3.86835e+06	1.17363e+06	1.07277e+06	2.79722e+06	756694	1.19246e+06
89	tr|E7EUF1|E7EUF1_HUMAN.IEDIHLLVER.+3	412.903	36.84	tr|E7EUF1|E7EUF1_HUMAN	508642	679115	462459	558520	677992	559339	240597	920925	512706	72849	762502	1.81774e+06	345364	1.31332e+06	217788	341090	916731	748703	646112	1.17086e+06	263419	380019	1.23907e+06	676080
90	tr|E7EUF1|E7EUF1_HUMAN.DIEHLTSLDFFR.+3	498.252	52.24	tr|E7EUF1|E7EUF1_HUMAN	38538.1	354906	168173	201587	170770	521323	209220	994571	618723	182014	1.52018e+06	1.04634e+06	1.67502e+06	1.44627e+06	682809	535240	80.2658	514011	1.0597e+06	480044	807263	799681	827241	968881
91	tr|E7EUF1|E7EUF1_HUMAN.TYLHTYESEI.+2	628.296	34.54	tr|E7EUF1|E7EUF1_HUMAN	240697	270774	245819	242722	228987	115108	90140.8	224251	178299	61960.4	356725	328634	307266	241322	120674	94192.3	195669	109148	160956	138622	256108	217132	235032	152669
92	tr|E7EUF1|E7EUF1_HUMAN.RIEDIHLLVER.+3	464.937	33.9	tr|E7EUF1|E7EUF1_HUMAN	953024	995378	763774	1.04987e+06	410365	387535	45946	791626	403479	212920	1.07962e+06	344747	1.68869e+06	1.21117e+06	576895	393943	625957	555.197	657874	15396.7	971854	834906	452922	318651
93	tr|E7EUF1|E7EUF1_HUMAN.YGPFGPEMTNPLR.+2	739.859	44.22	tr|E7EUF1|E7EUF1_HUMAN	117225	393540	284492	351691	150551	103658	4789.66	131172	172682	5771.5	560823	440856	56618.6	187760	17998.8	23272	130087	153651	63175.4	187077	78771.7	1529.85	341377	109062
94	tr|E7EUF1|E7EUF1_HUMAN.IVGQLMDGLK.+2	537.305	37.88	tr|E7EUF1|E7EUF1_HUMAN	1.03475e+06	1.16087e+06	1.13673e+06	1.19287e+06	616144	320367	12884.6	263880	369923	40164.1	1.41965e+06	1.04997e+06	416872	562109	80171.6	98465.8	455482	309944	281073	517853	459226	310297	802967	272218
95	tr|E7EUF1|E7EUF1_HUMAN.VSPSFSQNC[CAM]LAYK.+2	750.861	42.28	tr|E7EUF1|E7EUF1_HUMAN	9746.25	10507.8	1257.97	4676.56	310.72	46880.8	160543	41121.5	5183.68	129972	6123.2	8727.04	362638	4823.27	20078.4	42300.1	198083	1809.39	200012	2195.15	43354.7	27986	5461.46	9856.72
96	tr|E7EUF1|E7EUF1_HUMAN.TEFLSNYLTNVDDITLVPGTLGR.+3	846.774	58.27	tr|E7EUF1|E7EUF1_HUMAN	12993.6	55605.1	32672.9	33614.5	25423.9	95651.5	82669.4	216727	131528	35944.5	279725	214583	361882	263720	97897.9	94319.8	0	66880.3	217327	91402.2	135114	150352	156705	155516
97	tr|E7EUF1|E7EUF1_HUMAN.TLATGLYPESH.+2	594.798	32.2	tr|E7EUF1|E7EUF1_HUMAN	116143	83298.7	106065	121335	158511	21544.4	4933.51	81498.2	52339.8	13047.6	108154	338334	25503.1	171546	55282.4	31448.4	1263.41	230404	25373.2	210204	45602.7	45693.5	428199	131266
98	tr|E7EUF1|E7EUF1_HUMAN.AFYSEQPDFSGHK.+3	504.897	28.65	tr|E7EUF1|E7EUF1_HUMAN	218910	203465	211224	181581	172083	61883.2	8474.95	108499	123609	8510.98	304810	12870.1	332473	273349	301270	123136	89131.2	89536.5	6093.49	59442	225086	198760	280920	116989
99	sp|P06396|GELS_HUMAN.GASQAGAPQGR.+2	500.252	5.68	sp|P06396|GELS_HUMAN	49621.4	27597.2	18128.9	22660.8	22230.3	11284.2	4153.17	18700.8	7743.21	16647	9624.65	29835.1	5562.62	17440.3	221.058	9445.48	11701.9	10729.2	8822.42	12370.4	20066.6	26749.1	15845.2	19117.8
100	sp|P01011|AACT_HUMAN.EIGELYLPK.+2	531.298	39.36	sp|P01011|AACT_HUMAN	2.24283e+06	1.73665e+06	2.44669e+06	2.45639e+06	1.50159e+06	73009.5	655610	73393.4	36227.9	1.57165e+06	2.6377e+06	38130.5	17783.4	101118	826550	2.5784e+06	4.34299e+06	62936	122474	2.2961e+06	56929	4.61509e+06	3.04783e+06	3.60678e+06
101	sp|P01011|AACT_HUMAN.ADLSGITGAR.+2	480.759	26.6	sp|P01011|AACT_HUMAN	1.93502e+06	1.68853e+06	2.46542e+06	2.44074e+06	1.51215e+06	3.74124e+06	602100	3.5085e+06	2.7219e+06	1.51828e+06	2.44441e+06	1.89495e+06	3.01558e+06	4.71468e+06	990388	2.85792e+06	4.26875e+06	1.32619e+06	2.72289e+06	1.67336e+06	6.10917e+06	4.19404e+06	3.05841e+06	3.87276e+06
102	sp|P01011|AACT_HUMAN.LYGSEAFATDFQDSAAAK.+2	946.439	41.46	sp|P01011|AACT_HUMAN	906279	847037	1.14832e+06	1.08018e+06	588952	1.54393e+06	338518	1.38668e+06	1.31268e+06	674959	1.17678e+06	1.41953e+06	1.66412e+06	2.17114e+06	381914	1.13324e+06	2.28684e+06	388695	1.91678e+06	646125	3.45715e+06	2.38895e+06	1.36994e+06	1.87459e+06
103	sp|P01011|AACT_HUMAN.NLAVSQVVHK.+2	547.819	23.66	sp|P01011|AACT_HUMAN	1.0822e+06	831263	1.20553e+06	1.26633e+06	674028	1.10568e+06	28258.2	1.02724e+06	987293	425828	735070	741518	510681	1.26821e+06	168299	612337	947838	193180	486931	210464	1.34547e+06	1.20107e+06	1.02646e+06	1.22594e+06
104	sp|P01011|AACT_HUMAN.ITLLSALVETR.+2	608.369	52.16	sp|P01011|AACT_HUMAN	595537	1.2517e+06	1.55797e+06	1.43643e+06	783376	4.8523e+06	69907.1	4.43029e+06	2.82104e+06	1.96961e+06	2.71034e+06	4.28591e+06	5.17208e+06	8.25659e+06	1.47436e+06	3.29156e+06	52166.5	824057	3.43524e+06	1.12701e+06	1.00614e+07	6.34009e+06	2.14154e+06	5.88193e+06
105	sp|P01011|AACT_HUMAN.MEEVEAMLLPETLK.+2	816.915	48.28	sp|P01011|AACT_HUMAN	37260.5	357963	581065	502263	148912	290448	1200.92	160803	319502	2307.88	315623	317819	63211.4	381208	12905.1	41819.1	6994.2	36455.5	96980.3	56851.9	159241	249120	274720	267492
106	sp|P01011|AACT_HUMAN.HPNSPLDEENLTQENQDR.+3	712.658	27.16	sp|P01011|AACT_HUMAN	780356	679431	1.044e+06	726858	562235	1.55103e+06	199581	1.12743e+06	1.02116e+06	523394	864775	1.03619e+06	979384	1.46936e+06	227241	952231	1.83798e+06	369883	765615	332064	2.80422e+06	1.35441e+06	1.08615e+06	1.21094e+06
107	sp|P01011|AACT_HUMAN.WEMPFDPQDTHQSR.+3	591.927	42.39	sp|P01011|AACT_HUMAN	73091.6	368803	503812	532534	176673	505833	8216.74	211366	228802	7509.7	248887	380708	91443.1	403250	12719.4	86289.2	269011	69177.1	131745	78863	452194	81758.9	350960	255878
108	sp|P01011|AACT_HUMAN.NSPLDEENLTQENQDR.+2	951.427	29.62	sp|P01011|AACT_HUMAN	186893	108608	136457	233769	120934	288028	53879.3	434110	218280	100048	123623	258023	132116	370671	33400.6	147001	287551	75893.5	222945	96797.7	130960	343117	146737	197685
109	sp|P01011|AACT_HUMAN.LMIIVPTDTQNIFFMSK.+2	999.526	58.11	sp|P01011|AACT_HUMAN	76612.8	62937.7	111001	65486.8	8608.52	177452	5288.85	28717.9	92939.7	6430.7	115127	94678.9	105129	275403	20936.3	40115.4	0	12517.5	26371	8868.47	320304	241494	69989.1	56966
110	sp|P36955|PEDF_HUMAN.ELLDTVTAPQK.+2	607.835	31.95	sp|P36955|PEDF_HUMAN	2.79523e+06	1.81539e+06	2.70382e+06	2.9614e+06	2.58349e+06	2.10861e+06	997703	3.62056e+06	1.62576e+06	1.04111e+06	3.95018e+06	5.15486e+06	4.63035e+06	4.18022e+06	1.50916e+06	1.75203e+06	3.2774e+06	1.63208e+06	2.64072e+06	2.34953e+06	3.60512e+06	4.03985e+06	2.73704e+06	2.15799e+06
111	sp|P36955|PEDF_HUMAN.TVQAVLTVPK.+2	528.327	33.11	sp|P36955|PEDF_HUMAN	1.63136e+06	1.74336e+06	1.45987e+06	1.64894e+06	1.31223e+06	1.22878e+06	535326	1.80035e+06	1.2851e+06	737008	1.93126e+06	2.51437e+06	2.56788e+06	2.25563e+06	825982	974846	1.84255e+06	610433	1.54067e+06	1.0297e+06	1.75921e+06	1.96901e+06	1.16516e+06	1.21151e+06
112	sp|P36955|PEDF_HUMAN.LQSLFDSPDFSK.+2	692.343	43.28	sp|P36955|PEDF_HUMAN	1.23482e+06	1.65935e+06	1.54844e+06	1.60795e+06	1.31478e+06	1.32269e+06	602836	2.01383e+06	1.55931e+06	831520	2.8554e+06	3.04425e+06	3.28531e+06	2.82897e+06	985103	1.0899e+06	2.12352e+06	961087	2.0452e+06	1.5301e+06	2.41889e+06	2.47085e+06	1.99594e+06	1.70684e+06
113	sp|P36955|PEDF_HUMAN.LAAAVSNFGYDLYR.+2	780.396	44.69	sp|P36955|PEDF_HUMAN	70456.3	234693	288415	289625	204682	1.26542e+06	703389	984305	378765	1.08183e+06	1.82828e+06	791070	3.6154e+06	2.13032e+06	992059	1.21056e+06	2.36654e+06	216557	2.28719e+06	268371	1.95694e+06	1.68126e+06	668585	1.70712e+06
114	sp|P36955|PEDF_HUMAN.DTDTGALLFIGK.+2	625.835	47.45	sp|P36955|PEDF_HUMAN	867298	1.24112e+06	1.00891e+06	1.03973e+06	854132	838848	488367	1.33305e+06	1.02722e+06	560153	1.63219e+06	1.69225e+06	1.78429e+06	1.49664e+06	527221	792138	12812.6	478158	1.33941e+06	892286	1.42239e+06	1.41583e+06	849354	1.02913e+06
115	sp|P36955|PEDF_HUMAN.TSLEDFYLDEER.+2	758.844	43.67	sp|P36955|PEDF_HUMAN	1.04582e+06	1.03872e+06	959069	1.09452e+06	1.18728e+06	831755	750322	1.52376e+06	1.24435e+06	384020	1.7554e+06	2.88688e+06	1.37777e+06	1.9683e+06	520609	745146	1.54303e+06	1.36017e+06	1.35828e+06	1.84436e+06	1.29202e+06	1.45169e+06	1.70037e+06	1.23623e+06
116	sp|P36955|PEDF_HUMAN.LSYEGEVTK.+2	513.261	22.6	sp|P36955|PEDF_HUMAN	1.1086e+06	1.27169e+06	1.24472e+06	1.40898e+06	1.24374e+06	515321	688355	1.24755e+06	820821	626728	1.51245e+06	1.48266e+06	1.63346e+06	1.30102e+06	804101	927954	1.54988e+06	673292	1.01951e+06	769762	1.11492e+06	978612	1.13801e+06	1.07362e+06
117	sp|P36955|PEDF_HUMAN.EIPDEISILLLGVAH.+2	809.956	59.78	sp|P36955|PEDF_HUMAN	86700.3	104258	97998	116916	96466.7	95321.3	524.263	169982	124923	1718.63	224681	680731	80280.4	272236	106589	83923.8	0	222591	85122	156351	220440	255787	319185	410496
118	sp|P36955|PEDF_HUMAN.ALYYDLISSPDIHGTYK.+3	652.663	43.59	sp|P36955|PEDF_HUMAN	692037	886726	872540	918846	777745	725747	206358	1.17199e+06	916117	471388	1.7849e+06	1.78306e+06	2.1824e+06	1.64463e+06	751389	796102	1.49756e+06	637446	1.30136e+06	889914	1.47695e+06	1.60777e+06	1.1361e+06	1.1538e+06
119	sp|P36955|PEDF_HUMAN.EIPDEISILLLGVAHFK.+3	632.028	59.47	sp|P36955|PEDF_HUMAN	192159	385074	298503	252159	238202	460605	253992	602241	75005.7	411269	261388	497441	1.56266e+06	979258	529027	388280	0	121589	690810	206433	1.36298e+06	1.2134e+06	395499	498442
120	tr|B4E1Z4|B4E1Z4_HUMAN.EELLPAQDIK.+2	578.316	33.7	tr|B4E1Z4|B4E1Z4_HUMAN	1.10781e+06	806933	1.04642e+06	1.29318e+06	518246	1.03495e+06	200673	1.70263e+06	1.11322e+06	206734	1.02535e+06	1.3606e+06	1.47163e+06	1.73858e+06	426414	923212	1.73712e+06	927423	654836	1.06711e+06	1.59311e+06	2.38724e+06	1.36669e+06	1.36168e+06
121	tr|B4E1Z4|B4E1Z4_HUMAN.DISEVVTPR.+2	508.275	30.12	tr|B4E1Z4|B4E1Z4_HUMAN	1.24536e+06	918543	1.1279e+06	1.49812e+06	530650	1.53857e+06	238026	2.19106e+06	1.27067e+06	534508	1.15169e+06	1.46873e+06	1.89824e+06	2.22037e+06	401710	1.13152e+06	6508.13	776695	985690	1.04297e+06	1.6066e+06	2.48075e+06	1.6581e+06	1.36478e+06
122	tr|B4E1Z4|B4E1Z4_HUMAN.ALFVSEEEK.+2	526.269	28.4	tr|B4E1Z4|B4E1Z4_HUMAN	761742	472544	659947	1.01292e+06	390474	709390	100171	1.3723e+06	616595	126200	685037	843483	727699	1.31899e+06	274417	551720	936535	591724	435467	793190	784721	1.14989e+06	1.19425e+06	1.08433e+06
123	tr|B4E1Z4|B4E1Z4_HUMAN.EAGIPEFYDYDVALIK.+2	921.962	54.73	tr|B4E1Z4|B4E1Z4_HUMAN	182289	199822	241381	317126	53986	474345	41042.9	664269	390674	218682	381757	432953	500573	736939	67827.4	378294	116.95	244081	412556	267148	501678	757091	557443	670961
124	tr|B4E1Z4|B4E1Z4_HUMAN.DLLYIGK.+2	411.242	37.89	tr|B4E1Z4|B4E1Z4_HUMAN	691503	533662	644377	843030	285084	987134	46183.5	26945.4	697973	70299.4	748404	959014	1.23417e+06	1.58563e+06	251661	776813	1.21647e+06	460741	690238	621229	1.09397e+06	1.80259e+06	833282	836531
125	tr|B4E1Z4|B4E1Z4_HUMAN.VSEADSSNADWVTK.+2	754.847	26.61	tr|B4E1Z4|B4E1Z4_HUMAN	187667	167895	202992	260176	95968.2	341702	53637.2	461098	253807	187506	224263	252628	350271	449474	57723.4	213466	401269	102793	174856	133552	219421	445813	278097	268774
126	tr|B4E1Z4|B4E1Z4_HUMAN.GDSGGPLIVHK.+2	540.296	19.68	tr|B4E1Z4|B4E1Z4_HUMAN	86941.2	59695.7	86976.4	115500	32233.1	75361.8	151.679	142828	72875.9	35783.5	50483.5	75504	54036	150482	31032	61456.7	126211	25605.1	32913.8	27148.6	48001.6	107064	74971.2	71887.4
127	tr|B4E1Z4|B4E1Z4_HUMAN.PIC[CAM]LPC[CAM]TEGTTR.+2	702.834	31.29	tr|B4E1Z4|B4E1Z4_HUMAN	76067.3	123033	116436	339719	65638.6	459439	3941.26	175651	211424	2148.91	117360	176851	92897.3	518261	35953.3	82405.9	732774	82888.8	82357.9	27894.9	189936	244680	32529.3	105509
128	tr|B4E1Z4|B4E1Z4_HUMAN.C[CAM]LVNLIEK.+2	494.778	38.22	tr|B4E1Z4|B4E1Z4_HUMAN	85428.2	57149.5	69324.9	70168.3	18032.2	214459	13244.3	119757	99336.6	229058	72876.7	29573.8	250733	194814	33600	115530	102794	11061	3791.07	8101.55	199682	325349	77845.7	49539.2
129	sp|P02774|VTDB_HUMAN.RSDFASNC[CAM]C[CAM]SINSPPLYC[CAM]DSEIDAELK.+3	1050.13	39.25	sp|P02774|VTDB_HUMAN	582.037	2316.24	10733.2	3373.59	4078.38	16753.9	2551.26	917.029	5932.85	37705.4	3448.45	3024.22	14808.2	1513.32	2984.93	11852.9	14940.7	379.134	19400.8	1460.34	176.497	16842.6	2223.34	10363.1
130	sp|P02774|VTDB_HUMAN.SINSPPLYC[CAM]DSEIDAELK.+2	1025.99	46.43	sp|P02774|VTDB_HUMAN	8486.82	21143.3	954.59	9903.72	5960.18	49975.2	1932.3	29494.9	22215	29059	8863.71	18624.7	7452.08	11062	413.912	23352.7	14023.6	7360.53	4271.02	1594.69	6093.97	17591.4	3492.91	1626.19
131	sp|P02774|VTDB_HUMAN.SDFASNC[CAM]C[CAM]SINSPPLYC[CAM]DSEIDAELK.+3	998.093	34.34	sp|P02774|VTDB_HUMAN	2019.33	14342.9	2430.31	8991.11	1169.45	103355	3392.87	33220.1	29456.8	16633.6	1062.91	3451.69	5411.83	5785.69	216.487	33859.2	662.06	8652.59	17729.6	4672.43	1469.03	30626.7	2192.21	9603.47
132	sp|P02774|VTDB_HUMAN.SPPLYC[CAM]DSEIDAELK.+2	868.906	41.43	sp|P02774|VTDB_HUMAN	3167.36	732.988	4134.3	10215.5	11131.3	23394.4	12170.9	6429.68	16989.1	419.924	3157.64	11589.4	16898.7	5251.84	3373.49	3074.76	11639	5284.25	5035.37	12118.1	4855.91	3530.58	9308.22	27467
133	sp|P02774|VTDB_HUMAN.KLPDATPK.+2	435.258	25.85	sp|P02774|VTDB_HUMAN	125930	68296.5	81395.2	127153	2900.05	125234	12118.2	124291	178988	3989.47	149197	17885.3	2460.82	2438.81	7390.54	86445.6	8045.07	8830.62	94060.9	8249.49	59592.9	139243	52677.1	7999.68
134	sp|P01023|A2MG_HUMAN.NEDSLVFVQTDK.+2	697.844	35.98	sp|P01023|A2MG_HUMAN	13758.8	23155	32869.6	20093.7	11883.1	165229	65184.1	56992.3	89900.5	158154	123214	89124.5	98557	101485	37819.4	91780.3	58834.8	147732	234756	38152.3	145988	276748	40769	46688.2
135	sp|P01023|A2MG_HUMAN.SIYKPGQTVK.+2	560.822	14.8	sp|P01023|A2MG_HUMAN	1523.99	641.493	27312.6	2088.09	334.85	25933.3	6986.14	3961.34	17573	36747.5	17223.4	251.967	22174.4	7096.59	7843.5	26698.4	17268.9	23047.6	37415.3	7171.37	13049.3	21959.4	1853.87	4799.32
136	sp|P01023|A2MG_HUMAN.DTVIKPLLVEPEGLEK.+3	594.008	44.25	sp|P01023|A2MG_HUMAN	26305	34670.1	55625.1	34119.3	21215.4	340946	249000	130120	178605	375869	234097	283889	191838	331317	89242.8	217444	145294	114242	661159	81291.2	304237	483645	47068.4	97980.2
137	sp|P01023|A2MG_HUMAN.LPPNVVEESAR.+2	605.825	20.92	sp|P01023|A2MG_HUMAN	3951.54	78244.8	66779	2601.09	46328.5	743239	437078	317564	453175	621276	485923	489557	342140	568259	216602	385765	300636	717846	951120	157491	568030	1.04482e+06	115832	185665
138	sp|P01023|A2MG_HUMAN.TEVSSNHVLIYLDK.+3	539.954	36.99	sp|P01023|A2MG_HUMAN	9256.83	16515.4	24689.9	3171.49	8673.7	121618	6243.99	70006.1	77983.5	42234.2	108446	113305	70426.5	11393.3	40881.2	54246	42473.8	117451	154035	28778.4	133759	288679	37552.2	45303
139	sp|P01023|A2MG_HUMAN.AVLPTGDVIGDSAK.+2	671.864	33.83	sp|P01023|A2MG_HUMAN	11892.4	16070.9	26753.8	28860.5	10892.1	52463	3938.41	39687.5	84325	5277.87	114456	229218	2087.9	120824	26463	1090.98	22271.2	315365	34161.3	46632.7	81040.1	139386	102277	41445.3
140	sp|P01023|A2MG_HUMAN.AIGYLNTGYQR.+2	628.325	28.24	sp|P01023|A2MG_HUMAN	2585.23	16930.5	10105.2	8736.47	10978.9	290407	192144	152419	121571	297416	179232	155976	168527	263089	10205.3	147047	131228	179754	363050	55833.2	291371	468535	40963.2	85005.4
141	sp|P01023|A2MG_HUMAN.VSVQLEASPAFLAVPVEK.+2	942.528	51.27	sp|P01023|A2MG_HUMAN	7061.32	14478.8	16761.8	9893.94	3747.26	111347	20637.9	40550.6	53591.2	134428	61524	69996.5	66382	85886.4	26931.1	60662.8	1587.3	42603	154075	16769.8	107848	200475	18777.8	34126.5
142	sp|P01023|A2MG_HUMAN.SLNEEAVK.+2	445.235	30.11	sp|P01023|A2MG_HUMAN	5503.13	2437.23	8346.41	8979.2	11198.7	7950.07	15754.9	13232.9	1486.68	8896.6	10214.5	9871.68	5481.33	13581.5	8123.75	16186.2	9907.75	25930.3	10299.8	8818.64	12375.2	13653.5	10054.5	20089
143	sp|P01023|A2MG_HUMAN.PVPGHVTVSIC[CAM]R.+3	441.24	18.89	sp|P01023|A2MG_HUMAN	7142.03	22366.1	20008.4	11810	9493.53	318591	22016.8	113268	170865	45209.1	186807	180689	124675	224142	95240.8	185141	115697	184338	232559	35276.8	237163	409558	4705.76	82323.7
144	sp|P02649|APOE_HUMAN.SELEEQLTPVAEETR.+2	865.926	36.04	sp|P02649|APOE_HUMAN	878821	1.305e+06	678299	1.61583e+06	1.41658e+06	4.30002e+06	1.6353e+06	4.79561e+06	4.73479e+06	1.18193e+06	5.33906e+06	1.17601e+07	4.01391e+06	6.91293e+06	1.51003e+06	2.10705e+06	3.50351e+06	2.06916e+06	3.64968e+06	1.49476e+06	4.29997e+06	5.52544e+06	2.87289e+06	3.17124e+06
145	sp|P02649|APOE_HUMAN.AATVGSLAGQPLQER.+2	749.405	31.54	sp|P02649|APOE_HUMAN	1.75321e+06	1.36558e+06	740603	1.80198e+06	1.59878e+06	5.45437e+06	2.59558e+06	6.09362e+06	5.40348e+06	1.37992e+06	4.77145e+06	1.44286e+07	4.12615e+06	8.26905e+06	1.59835e+06	2.34423e+06	3.58753e+06	2.36437e+06	3.67223e+06	2.05376e+06	3.51685e+06	6.44387e+06	3.10437e+06	3.14729e+06
146	sp|P02649|APOE_HUMAN.LEEQAQQIR.+2	557.796	18.14	sp|P02649|APOE_HUMAN	1.58698e+06	1.49033e+06	906289	2.1285e+06	1.84776e+06	2.56679e+06	1.15929e+06	3.28117e+06	3.57035e+06	341267	3.31514e+06	6.08499e+06	1.17518e+06	4.09237e+06	1.58128e+06	1.89878e+06	2.50695e+06	1.95686e+06	2.10742e+06	1.07626e+06	1.60583e+06	2.25923e+06	2.29422e+06	2.19843e+06
147	sp|P02649|APOE_HUMAN.LGPLVEQGR.+2	484.78	26.43	sp|P02649|APOE_HUMAN	2.12934e+06	1.89438e+06	1.2559e+06	2.56336e+06	2.35936e+06	1.8719e+06	1.13896e+06	2.58363e+06	3.21306e+06	124069	1.63744e+06	9.21966e+06	532790	2.73372e+06	573080	781049	1.732e+06	3.04918e+06	1.18686e+06	2.56578e+06	582344	1.12994e+06	2.82705e+06	1.82148e+06
148	sp|P02649|APOE_HUMAN.LAVYQAGAR.+2	474.767	22.59	sp|P02649|APOE_HUMAN	1.29333e+06	1.00633e+06	808205	1.6888e+06	1.55373e+06	5.45878e+06	2.78724e+06	6.14161e+06	4.75367e+06	2.07336e+06	4.80002e+06	7.01274e+06	3.93136e+06	5.63463e+06	2.56554e+06	3.5597e+06	5.02204e+06	1.83761e+06	4.98974e+06	1.73521e+06	2.26863e+06	4.20267e+06	988754	4.01028e+06
149	sp|P02649|APOE_HUMAN.SWFEPLVEDMQR.+2	768.861	52.95	sp|P02649|APOE_HUMAN	1.61129e+06	1.82431e+06	1.1998e+06	2.68274e+06	1.35758e+06	3.11109e+06	237015	1.99005e+06	3.98385e+06	603123	7.00877e+06	9.43641e+06	1.46313e+06	3.97926e+06	358614	761505	2751.97	1.78203e+06	2.22716e+06	1.2762e+06	2.39028e+06	2.46976e+06	2.96614e+06	2.08997e+06
150	sp|P02649|APOE_HUMAN.VQAAVGTSAAPVPSDNH.+2	810.903	25.35	sp|P02649|APOE_HUMAN	386636	261449	166060	384769	301854	1.0552e+06	249977	1.01669e+06	905862	289106	763434	1.70321e+06	406959	882816	153862	348744	581324	196026	329282	118195	432371	568291	333487	357661
151	sp|P02649|APOE_HUMAN.KVEQAVETEPEPELR.+3	585.304	25.52	sp|P02649|APOE_HUMAN	2.10518e+06	2.61271e+06	1.50899e+06	2.90792e+06	2.33568e+06	5.64007e+06	1.57898e+06	5.98285e+06	6.80297e+06	2.06946e+06	6.39226e+06	1.06061e+07	4.17252e+06	7.72284e+06	3.16457e+06	3.61953e+06	5.36758e+06	1.19604e+06	4.64836e+06	857738	4.51232e+06	5.14725e+06	3.6739e+06	4.02954e+06
152	sp|P02649|APOE_HUMAN.LQAEAFQAR.+2	517.275	24.65	sp|P02649|APOE_HUMAN	253614	417823	241882	422532	283431	2.6799e+06	2.35555e+06	2.13027e+06	1.69793e+06	2.34402e+06	1.34863e+06	2.12172e+06	3.6145e+06	2.04666e+06	1.09464e+06	1.92049e+06	3.79689e+06	186982	3.69967e+06	252273	1.77374e+06	1.96489e+06	185292	771706
153	sp|P02649|APOE_HUMAN.VEQAVETEPEPELR.+2	813.404	28.8	sp|P02649|APOE_HUMAN	171524	136678	131191	221327	633350	852850	1.51194e+06	1.14663e+06	628456	43987.8	464473	4.1012e+06	225340	1.48658e+06	143435	597946	812628	2.08228e+06	621478	1.28988e+06	377274	598562	768706	848295
154	sp|P10909|CLUS_HUMAN.TLLSNLEEAK.+2	559.309	38.15	sp|P10909|CLUS_HUMAN	3.3005e+06	2.36059e+06	2.23985e+06	2.7836e+06	58041.8	3.43079e+06	1.25639e+06	3.72828e+06	3.76139e+06	810249	4.38426e+06	6.72175e+06	3.82279e+06	5.04516e+06	636608	1.99282e+06	4.11483e+06	1.48219e+06	3.46367e+06	2.36046e+06	2.51127e+06	3.94458e+06	1.2064e+06	727523
155	sp|P10909|CLUS_HUMAN.IDSLLENDR.+2	537.775	28.7	sp|P10909|CLUS_HUMAN	3.34879e+06	1.71427e+06	1.8174e+06	2.22823e+06	2.05761e+06	3.80544e+06	1.05244e+06	4.35649e+06	3.4318e+06	384583	3.11384e+06	3.94522e+06	3.11581e+06	2.93811e+06	484276	1.69477e+06	3.57169e+06	899143	2.33285e+06	1.23292e+06	2.05375e+06	3.65014e+06	665434	453224
156	sp|P10909|CLUS_HUMAN.ELDESLQVAER.+2	644.823	30.48	sp|P10909|CLUS_HUMAN	2.85401e+06	1.55501e+06	1.66675e+06	1.8836e+06	1.79274e+06	3.49076e+06	908144	4.18391e+06	3.61934e+06	1.17368e+06	3.16277e+06	4.10368e+06	2.89373e+06	2.35129e+06	450619	1.55312e+06	1.91091e+06	897512	2.01898e+06	1.33674e+06	1.92465e+06	2.11563e+06	612948	388260
157	sp|P10909|CLUS_HUMAN.EPQDTYHYLPF.+2	705.322	46.66	sp|P10909|CLUS_HUMAN	293042	92226.8	229756	203730	162257	538115	68335	332040	254906	47789.9	359459	193716	408021	288214	75514.7	246423	1340.34	46411	428756	70710.3	359988	477426	71287.2	67069
158	sp|P10909|CLUS_HUMAN.ASSIIDELFQDR.+2	697.351	54.07	sp|P10909|CLUS_HUMAN	3.0362e+06	1.87124e+06	2.16023e+06	2.49035e+06	2.20621e+06	4.97188e+06	1.50615e+06	5.28179e+06	4.63481e+06	2.22114e+06	5.08045e+06	5.53102e+06	4.77868e+06	4.50292e+06	670323	2.46801e+06	2043.7	1.56814e+06	4.33834e+06	2.69473e+06	3.01077e+06	5.15032e+06	1.2321e+06	796502
159	sp|P10909|CLUS_HUMAN.LFDSDPITVTVPVEVSR.+2	937.499	50.79	sp|P10909|CLUS_HUMAN	562577	925085	688183	953718	735635	2.80586e+06	615484	3.33394e+06	2.46752e+06	1.28889e+06	2.67134e+06	3.06835e+06	2.93489e+06	2.92139e+06	371832	1.30672e+06	1429.08	661493	2.59585e+06	1.00971e+06	1.76902e+06	3.22275e+06	543965	483356
160	sp|P10909|CLUS_HUMAN.EILSVDC[CAM]STNNPSQAK.+2	881.917	28.13	sp|P10909|CLUS_HUMAN	826743	472347	483574	534534	483354	1.43566e+06	278779	33069.8	1.27814e+06	540975	915796	1.20235e+06	863823	835021	105349	497398	1.12928e+06	168041	574883	296922	578613	1.07376e+06	28257.6	132339
161	sp|P10909|CLUS_HUMAN.VTTVASHTSDSDVPSGVTEVVVK.+3	772.064	33.64	sp|P10909|CLUS_HUMAN	2.57545e+06	2.03429e+06	1.95269e+06	2.19065e+06	1.9235e+06	3.82194e+06	334412	3.9683e+06	3.68635e+06	1.95737e+06	4.08961e+06	4.00885e+06	3.94832e+06	3.66878e+06	605986	1.91598e+06	3.88669e+06	697428	2.86349e+06	1.27641e+06	2.74776e+06	4.31745e+06	973952	644143
162	sp|P10909|CLUS_HUMAN.DQTVSDNELQEMSNQGSK.+2	1005.44	30.74	sp|P10909|CLUS_HUMAN	195941	93707.2	113407	127899	70484.6	146933	7765.31	91658.9	102256	30593	168517	149379	50968	76594.5	207.296	13927.4	75671.5	11766.3	37702.7	18560	59915.6	109232	18143.4	11579.8
163	sp|P10909|CLUS_HUMAN.PITVTVPVEVSR.+2	648.88	39.91	sp|P10909|CLUS_HUMAN	218586	337769	260941	290437	302126	518368	71397.7	1.09822e+06	729403	166223	745924	874534	492006	601477	131399	586152	1.27768e+06	185441	517906	279058	378922	1.13848e+06	143283	127565
164	sp|Q92823-2|NRCAM_HUMAN.LLEDLVQPPTITQQSPK.+2	954.028	45.58	sp|Q92823-2|NRCAM_HUMAN	305892	380920	202149	272374	320110	256329	114942	312003	542780	139760	517913	1.23241e+06	333069	620268	157922	158599	10797.3	185187	333538	278831	189088	612752	251834	342664
165	sp|Q92823-2|NRCAM_HUMAN.LLEDLVQPPTITQQSPK.+3	636.354	45.59	sp|Q92823-2|NRCAM_HUMAN	158694	195125	98468.7	124673	177650	155939	64901.8	164993	267177	70749.6	266646	773822	206708	417926	111679	115341	15935.3	131266	257391	220446	119301	298079	125405	170203
166	sp|P01008|ANT3_HUMAN.LPGIVAEGR.+2	456.269	28.89	sp|P01008|ANT3_HUMAN	458938	316525	366823	597262	257471	1.1188e+06	250391	640392	277735	146275	367249	614460	1.37044e+06	1.22084e+06	603583	892285	700256	219379	884627	599795	699615	868228	606861	942237
167	sp|P01008|ANT3_HUMAN.VAEGTQVLELPFK.+2	715.898	47.18	sp|P01008|ANT3_HUMAN	582710	501189	445935	740930	293757	1.1454e+06	97953.7	1.34376e+06	866967	54211.6	655984	1.13871e+06	1.36502e+06	1.6542e+06	499212	944443	732.875	300464	1.71841e+06	798997	733798	1.34319e+06	834456	1.17167e+06
168	sp|P01008|ANT3_HUMAN.FATTFYQHLADSK.+3	510.252	35.71	sp|P01008|ANT3_HUMAN	392636	294216	253169	383743	136680	596174	46755	619873	364530	302021	274308	295424	1.19261e+06	601106	199904	624960	592775	5379.09	1.01659e+06	106925	419622	712644	138324	306149
169	sp|P01008|ANT3_HUMAN.TSDQIHFFFAK.+3	447.559	41.16	sp|P01008|ANT3_HUMAN	131891	148640	117714	187756	77833.7	639008	52784.4	545318	267400	567801	269548	352328	1.39438e+06	711868	155184	654379	758860	51132.6	1.24445e+06	174766	368608	625827	97096.8	406377
170	sp|P01008|ANT3_HUMAN.DDLYVSDAFHK.+3	437.207	33.06	sp|P01008|ANT3_HUMAN	524311	398743	311876	561591	265137	867187	135439	1.00583e+06	603903	124911	391903	847176	1.24548e+06	962256	347014	698683	665843	191291	1.13577e+06	440817	477397	893437	426249	620098
171	sp|P01008|ANT3_HUMAN.GDDITMVLILPKPEK.+3	556.98	47.4	sp|P01008|ANT3_HUMAN	521510	376465	306007	531857	178942	718175	45745.9	684817	454326	30991.2	331180	622152	808408	854474	27408.6	76395.5	6820.76	104880	843269	471806	304516	511832	369460	433512
172	sp|P01008|ANT3_HUMAN.FATTFYQH.+2	507.738	31.09	sp|P01008|ANT3_HUMAN	147965	65585.9	78046.1	152459	82157.7	216825	4233.24	309668	114464	9511.81	70089	396655	60220.2	303705	34179.8	90804.3	137703	92249.2	101376	225439	63329.7	106255	140394	235022
173	sp|P01008|ANT3_HUMAN.HGSPVDIC[CAM]TAK.+2	592.79	19.33	sp|P01008|ANT3_HUMAN	373908	235284	207933	385783	162393	129907	3495.09	187103	137926	5947.82	49863.9	171284	42133.1	126672	27396.8	102123	59300.7	44415.6	37401.6	86301.8	31097.3	93561.3	58112.8	89005
174	sp|P01008|ANT3_HUMAN.ANRPFLVFIR.+3	411.58	42.42	sp|P01008|ANT3_HUMAN	21196.8	12009.1	15412.1	19054	29300.7	575509	325128	321141	43413.2	2.25256e+06	31865.1	109273	3.40985e+06	232485	126508	699575	1.60925e+06	55336.4	3.43554e+06	320607	158741	158996	32922.3	219176
175	sp|P01008|ANT3_HUMAN.TSDQIHFF.+2	497.735	41.15	sp|P01008|ANT3_HUMAN	99736.4	68911.4	58460.1	122871	58653.7	78111.8	16323.6	106203	86052	16977.3	69610.2	212310	46252.1	193732	31427.1	61231.4	69094.7	68649.2	43872	125990	62688.2	111437	177408	109396
176	sp|O00533|NCHL1_HUMAN.LTVNSSNSIK.+2	531.793	16.6	sp|O00533|NCHL1_HUMAN	2168.71	8843.71	7661.62	8837.63	18588.5	9184.72	10461	14879.4	10071.9	15147.4	9435.21	27506.8	15679.5	33652.3	2233.13	10625.9	3116.16	18452.2	17256.2	27778.6	5253.57	19270.4	18477	10880.4
177	sp|P05060|SCG1_HUMAN.GEAGAPGEEDIQGPTK.+2	778.365	22.82	sp|P05060|SCG1_HUMAN	797675	1.00858e+06	686713	1.06374e+06	1.23123e+06	502824	699503	1.20037e+06	528728	103439	775407	1.55456e+06	511084	907370	186867	541118	820392	491422	635728	349678	131179	476478	657977	756784
178	sp|P05060|SCG1_HUMAN.GYPGVQAPEDLEWER.+2	873.41	41.59	sp|P05060|SCG1_HUMAN	1.42389e+06	1.06671e+06	4448.08	2.19486e+06	2.39636e+06	1.66619e+06	507434	1.44499e+06	957313	2467.87	1.67879e+06	5.51138e+06	634083	1.70396e+06	293972	1.08718e+06	1.93486e+06	641216	2.24604e+06	1.44907e+06	263282	391683	731527	962507
179	sp|P05060|SCG1_HUMAN.ELENLAAMDLELQK.+2	808.914	47.09	sp|P05060|SCG1_HUMAN	512309	888726	445034	764121	685739	359440	4922.51	319458	3479.84	6734.05	8416.19	545456	2324.93	26051.4	3730.58	108581	23616.5	139309	220863	291639	2948.63	17175.9	8345.22	4573.06
180	sp|P05060|SCG1_HUMAN.NYLNYGEEGAPGK.+2	706.328	28.29	sp|P05060|SCG1_HUMAN	692493	1.02534e+06	503782	1.05177e+06	1.21708e+06	773198	700068	1.42989e+06	326263	43170.8	480162	1.86462e+06	400907	894603	106675	627076	1.11797e+06	371577	782703	603847	145661	262184	335651	654735
181	sp|P05060|SCG1_HUMAN.ADQTVLTEDEK.+2	624.801	21.12	sp|P05060|SCG1_HUMAN	481736	647021	350592	797684	1.04238e+06	247626	116583	586089	195291	5155.88	151104	653965	51874.3	249574	61611.5	222624	184722	277026	153972	380443	56238.3	84546.4	273861	269201
182	sp|P05060|SCG1_HUMAN.HLEEPGETQNAFLNER.+3	628.634	30.79	sp|P05060|SCG1_HUMAN	788677	846117	482667	999491	1.13921e+06	756732	738568	1.37225e+06	760038	73466.7	1.13567e+06	3.10082e+06	429108	1.71324e+06	194590	541543	1.03366e+06	330501	907996	456963	109879	596627	467130	966628
183	sp|P05060|SCG1_HUMAN.SAEFPDFYDSEEPVSTHQEAENEK.+3	929.063	38.43	sp|P05060|SCG1_HUMAN	137105	221166	111444	232359	273157	113485	38915	225210	60238.1	724.798	119806	418160	37473.9	148298	14256.6	79516.3	121172	87572.6	116589	162794	37429.2	46208.4	96897.1	91939.9
184	sp|P05060|SCG1_HUMAN.WQQQGDLQDTK.+2	673.82	20.98	sp|P05060|SCG1_HUMAN	168122	226946	125418	250181	272239	181707	65977.6	239808	58274	17503.9	62262.4	224957	22708.4	122050	1149.51	82928.9	150858	36103	85192.1	65959.7	5798.38	21494.9	46829.6	90981.2
185	sp|P05060|SCG1_HUMAN.ADQTVLTEDEKK.+3	459.568	17	sp|P05060|SCG1_HUMAN	203661	347338	216352	214111	187071	201121	163125	320017	107134	12370.7	111657	165948	64392	106333	33573	223821	330319	17604	211034	28757.1	35068	49080.6	24825.8	59259.5
186	sp|P05060|SCG1_HUMAN.AAMDLELQK.+2	509.765	30.79	sp|P05060|SCG1_HUMAN	11760.4	13986.1	14329.4	17781.5	25477.6	39276.7	1564.53	8550.57	8984.88	2682.42	3261.39	15032.9	93957.3	22504.8	4055.35	11016.1	9401.07	7563.34	25965.2	16177.2	14734.7	7997.22	8728.68	4715.63
187	sp|P04217|A1BG_HUMAN.LETPDFQLFK.+2	619.327	48.26	sp|P04217|A1BG_HUMAN	570953	618846	643490	793899	419120	1.18508e+06	261081	1.57749e+06	747652	668228	794192	1.00002e+06	1.98297e+06	2.13752e+06	306982	1.12142e+06	7449.6	701567	1.67704e+06	1.09308e+06	808451	928465	1.29139e+06	1.27116e+06
188	sp|P04217|A1BG_HUMAN.ATWSGAVLAGR.+2	544.796	33.69	sp|P04217|A1BG_HUMAN	482573	555164	588230	843472	390313	1.99509e+06	399807	2.77613e+06	790621	714238	755061	1.19699e+06	3.18419e+06	3.37814e+06	305558	1.3543e+06	1.61685e+06	590255	2.01489e+06	1.0951e+06	826586	991261	1.05516e+06	1.29559e+06
189	sp|P04217|A1BG_HUMAN.LELHVDGPPPRPQ.+3	485.596	30.19	sp|P04217|A1BG_HUMAN	78019.2	86764.7	71402	155421	79135.7	54400.4	1583.62	121707	4146.53	1975.2	52649.1	103598	3234.44	247379	1241.22	1349.21	7722.67	233019	8360.42	229772	1483.06	15504.9	262909	137311
190	sp|P04217|A1BG_HUMAN.HQFLLTGDTQGR.+3	458.237	27.27	sp|P04217|A1BG_HUMAN	569564	579646	588824	600173	331209	1.09994e+06	109673	1.55865e+06	651927	445798	582974	704727	1.67584e+06	1.57178e+06	181634	866504	973920	233675	912104	453596	440871	652631	751970	616542
191	sp|P04217|A1BG_HUMAN.TPGAAANLELIFVGPQHAGNYR.+3	766.066	47.7	sp|P04217|A1BG_HUMAN	67694.4	236738	150536	178302	78432.2	809800	113108	911227	231798	255524	312463	266027	1.48616e+06	1.30599e+06	136704	623146	11376.5	84725.7	903021	137980	463784	582752	277977	507343
192	sp|P04217|A1BG_HUMAN.LELHVDGPPPRPQL.+2	784.433	38.3	sp|P04217|A1BG_HUMAN	227185	96219.2	127521	166304	57130.9	38679.5	245.449	98239.5	48524.2	26943.4	8888.66	11687.7	343.116	45990.2	3224.77	3765.66	15366.1	8674.06	12796.5	66275.5	11527.2	35500.1	90348.8	2368.48
193	sp|P04217|A1BG_HUMAN.SLPAPWLSMAPVSWITPGLK.+2	1076.09	62.92	sp|P04217|A1BG_HUMAN	5014.21	112814	131936	100995	28460	185857	29312.4	133773	106656	78147.7	100661	45014	200285	111833	2624.08	56627.6	0	7290.26	160186	40956.3	40800.7	59560.8	39643	57519.7
194	sp|P04217|A1BG_HUMAN.NGVAQEPVHLDSPAIK.+3	558.965	31.19	sp|P04217|A1BG_HUMAN	205185	284877	243897	340852	138232	352629	40849.2	530581	228452	140044	205848	298260	610857	749289	57590.5	266324	187947	26372.8	388801	42751.2	180094	303477	323193	282865
195	sp|P04217|A1BG_HUMAN.SGLSTGWTQLSK.+2	632.83	36.19	sp|P04217|A1BG_HUMAN	316518	313322	297682	331211	144618	270869	50992.1	376519	252118	44895.8	151130	418649	347124	485596	30995	148598	226176	71911.2	259774	219887	86010.4	184677	363437	227873
196	sp|P04217|A1BG_HUMAN.SWVPHTFESELSDPVELLVAES.+2	1236.1	58.97	sp|P04217|A1BG_HUMAN	32711.4	25971.4	24085.7	21035	13707.2	42177.4	12495.5	55525.8	48241.3	35885.3	20680.5	11724.5	115754	77700	11909.8	28022.4	0	3569.83	63009.9	4725.28	31070.5	55733.5	29510.6	31044.5
197	sp|Q14624|ITIH4_HUMAN.GPDVLTATVSGK.+2	572.814	30.88	sp|Q14624|ITIH4_HUMAN	162224	117594	130778	122565	79483.2	522270	45819.4	372069	133174	154866	119022	218558	458259	580819	61777.4	257529	430982	79612.8	258473	127610	216745	669680	229318	198655
198	sp|Q14624|ITIH4_HUMAN.PSLVPASAENVNK.+2	663.357	36.26	sp|Q14624|ITIH4_HUMAN	5079.32	91405.6	2369.03	101463	61420.3	2708.28	14183.4	263537	153693	20267.8	81610.6	6642.05	158314	362484	135.652	11007.5	1013.76	3856.86	70087	5268.28	162801	439277	177758	12057
199	sp|Q14624|ITIH4_HUMAN.SPEQQETVLDGNLIIR.+2	906.479	43.71	sp|Q14624|ITIH4_HUMAN	18840	22420.1	22524	19871.2	10491.6	113724	1437.1	89497.8	46921.8	59747	32617.4	41358.3	137882	137998	12920.8	57909.9	100014	10412.1	66513.3	14463.2	58591.4	226323	50122.4	43411
200	sp|Q14624|ITIH4_HUMAN.LALDNGGLAR.+2	500.283	29.51	sp|Q14624|ITIH4_HUMAN	29530.9	31628.5	36128.1	34773.1	26612.7	492472	57292.9	405073	109594	182447	102755	194463	409223	499638	40891.3	282106	486584	86491.5	284277	123315	149511	441189	133303	149459
201	sp|Q14624|ITIH4_HUMAN.ETLFSVMPGLK.+2	611.331	49.96	sp|Q14624|ITIH4_HUMAN	250016	201717	183859	228432	88297.2	339786	6451.72	163235	178209	42025	213442	228263	170798	397844	821.822	81111.3	354.029	81247.1	156484	145490	147981	293018	185850	121977
202	sp|Q14624|ITIH4_HUMAN.ITFELVYEELLK.+2	748.916	58.37	sp|Q14624|ITIH4_HUMAN	25715.6	8484.39	24304.7	21647.3	20973.3	135526	552.651	155844	19878.8	55299	15565.8	74864.4	150494	321749	28748.7	42613.9	0	10480.1	36085.6	7828.72	70118.5	246697	106345	81136.2
203	sp|Q14624|ITIH4_HUMAN.FKPTLSQQQK.+3	402.228	17.95	sp|Q14624|ITIH4_HUMAN	47524.4	35894	37431.9	41694.2	26112.7	17072	3976.74	7039.1	18012.9	206526	28560.3	77867.4	48925.8	110097	6080.96	39717.4	36137.5	26089.5	61104.5	29347.2	38277.9	85695.4	54981.1	59530.5
204	sp|Q14624|ITIH4_HUMAN.ANTVQEATFQMELPK.+2	853.925	41.99	sp|Q14624|ITIH4_HUMAN	45624.4	39159.9	35407.8	42995.4	17944.6	47660.1	3453.15	31981.4	29722.5	14803.1	30446.1	34455.8	38199.7	57840.1	1172.02	13407.8	38757	5292.14	28377.6	381.166	30329.2	69806.2	40011.5	22063.4
205	sp|Q14624|ITIH4_HUMAN.NPLVWVHASPEHVVVTR.+3	647.355	40.05	sp|Q14624|ITIH4_HUMAN	1611.91	1123.97	2069.37	601.297	3330.49	43709	4666.24	23322.3	14128.3	46453.2	9646.82	3137.76	106096	22933.5	6581.13	43806.8	31231.9	5322.1	69697.8	429.745	1636.94	76063.9	777.966	1966.53
206	sp|Q14624|ITIH4_HUMAN.TGLLLLSDPDK.+2	586.332	43.51	sp|Q14624|ITIH4_HUMAN	245427	209779	164658	217186	98693	86436.7	2151.28	96116.9	127524	18703.8	56018.9	182249	39686.1	232399	17340.4	47907.8	36990.6	50994.4	35037.9	42564.3	39029.7	165890	203630	44636.8
207	sp|P02647|APOA1_HUMAN.VSFLSALEEYTK.+2	693.861	55.82	sp|P02647|APOA1_HUMAN	977876	1.2196e+06	953769	1.51435e+06	577288	4.40917e+06	423323	4.06913e+06	2.19718e+06	4.48211e+06	1.45427e+06	2.37667e+06	7.00264e+06	6.06799e+06	1.00995e+06	4.01602e+06	259.726	416614	4.81762e+06	2.10008e+06	1.73335e+06	4.50772e+06	2.7148e+06	2.60633e+06
208	sp|P02647|APOA1_HUMAN.DYVSQFEGSALGK.+2	700.838	41.9	sp|P02647|APOA1_HUMAN	622337	709621	534968	908962	379197	1.9506e+06	294169	1.71417e+06	1.04114e+06	1.05383e+06	610329	1.10343e+06	2.74412e+06	2.47524e+06	300448	1.55353e+06	1.15384e+06	229735	1.97468e+06	937009	707113	1.9609e+06	1.08069e+06	798926
209	sp|P02647|APOA1_HUMAN.LLDNWDSVTSTFSK.+2	806.896	47.99	sp|P02647|APOA1_HUMAN	458542	614519	455959	665881	273798	2.14766e+06	283555	1.76598e+06	924968	2.80381e+06	669529	815285	3.50316e+06	2.3509e+06	332698	1.75754e+06	14014.8	149384	2.22579e+06	780645	669239	2.14288e+06	917110	1.05509e+06
210	sp|P02647|APOA1_HUMAN.DLATVYVDVLK.+2	618.348	51.28	sp|P02647|APOA1_HUMAN	966006	1.24616e+06	900234	1.51712e+06	716916	3.44021e+06	227563	3.20408e+06	2.05706e+06	1.91673e+06	934459	2.3955e+06	4.42827e+06	4.87838e+06	735619	2.79802e+06	756.476	508975	3.36171e+06	1.79764e+06	1.38896e+06	3.29825e+06	2.19598e+06	2.11284e+06
211	sp|P02647|APOA1_HUMAN.AKPALEDLR.+2	506.793	22.64	sp|P02647|APOA1_HUMAN	219110	298072	295745	544290	191969	1.70069e+06	275382	1.6462e+06	566654	1.16916e+06	264354	527520	1.43204e+06	1.55769e+06	251444	1.16038e+06	922416	136791	1.11861e+06	441445	262988	733935	641983	506928
212	sp|P02647|APOA1_HUMAN.ATEHLSTLSEK.+3	405.879	17.47	sp|P02647|APOA1_HUMAN	525345	447336	377294	605077	258318	501070	80102.8	535872	337485	689077	140335	257238	669491	686001	126680	526074	355624	59347.7	524986	211728	130656	421399	398844	298335
213	sp|P02647|APOA1_HUMAN.EQLGPVTQEFWDNLEK.+2	966.971	53.25	sp|P02647|APOA1_HUMAN	646035	633839	510149	832902	349139	1.6991e+06	133472	1.63873e+06	1.00209e+06	224673	449278	905910	1.5345e+06	2.11582e+06	244867	1.22401e+06	1334.53	217074	1.30374e+06	894177	479948	1.58862e+06	1.08055e+06	824061
214	sp|P02647|APOA1_HUMAN.THLAPYSDELR.+3	434.554	26.3	sp|P02647|APOA1_HUMAN	328537	617490	390979	815025	293831	2.44343e+06	329296	2.2111e+06	1.08246e+06	2.03262e+06	577040	941891	3.22459e+06	2.59165e+06	449536	2.16515e+06	1.57243e+06	206509	1.98405e+06	623595	565250	1.86946e+06	852298	878023
215	sp|P02647|APOA1_HUMAN.QGLLPVLESFK.+2	615.858	53.75	sp|P02647|APOA1_HUMAN	100202	237558	53427.2	269980	81814.6	159988	69627	93921.3	429722	593279	169439	19776.9	1.3107e+06	372784	160780	626667	3957.67	33739.5	854904	11288.9	209648	865848	139477	66499.9
216	sp|P02647|APOA1_HUMAN.THLAPYSDEL.+2	573.277	33.27	sp|P02647|APOA1_HUMAN	549895	240919	269843	417955	188070	191974	43310.5	232528	132678	9507.85	8731.6	220486	1090.34	117658	5675.41	61690.9	18198.1	15712.1	8401.41	223365	32188.4	172701	186631	5147.98
217	sp|P08603|CFAH_HUMAN.SSNLIILEEHLK.+3	465.933	39.86	sp|P08603|CFAH_HUMAN	268740	305423	240933	349246	191094	371661	25819.9	491727	236297	238475	303591	552651	610350	729538	83719.6	318802	546872	123942	441599	222207	473098	869112	234589	239600
218	sp|P08603|CFAH_HUMAN.SPDVINGSPISQK.+2	671.354	28.56	sp|P08603|CFAH_HUMAN	134486	48819.7	73884.8	80247.5	81514.3	311162	51629.6	374972	103391	89120	127165	329650	289874	329080	15111	156624	307059	58804.2	170765	78794.8	134961	264098	85996.8	147964
219	sp|P08603|CFAH_HUMAN.RPYFPVAVGK.+2	567.327	30.83	sp|P08603|CFAH_HUMAN	144529	100894	116700	161142	79957.2	155738	6381.31	126789	8459.57	68783.5	62859.1	165268	165311	269619	19972.6	82368.5	138791	30535	115016	37720	191850	218753	44325.4	69422.4
220	sp|P08603|CFAH_HUMAN.TLTGGNVFEYGVK.+2	692.859	39.1	sp|P08603|CFAH_HUMAN	234744	220546	179752	328438	163221	141868	10377.8	247954	187447	186.031	155867	438470	85025.5	424778	63301.6	245113	227912	125629	78035.3	165901	301382	623184	159267	132599
221	sp|P08603|CFAH_HUMAN.SPPEISHGVVAH.+3	410.547	21.37	sp|P08603|CFAH_HUMAN	289146	232575	119020	334410	172552	210987	10185.6	300667	128964	9470.83	81001.7	260904	45860.4	270896	13494.6	79068.7	163497	47998.7	71654.2	65139.5	86358.9	94932.5	109405	65896.1
222	sp|P08603|CFAH_HUMAN.IDVHLVPDR.+2	532.298	30.74	sp|P08603|CFAH_HUMAN	98061	81109.8	73503.7	98276.4	42627.2	97645.2	4058.74	145824	65036.9	3744.04	70265.9	88262.4	191116	184831	26014.8	89177.8	4125.68	2629.31	107017	16167.7	123169	243452	22993.6	36995.3
223	sp|P08603|CFAH_HUMAN.SIDVAC[CAM]HPGYALPK.+3	509.926	31.41	sp|P08603|CFAH_HUMAN	57615.5	66967.9	39752.5	71677.9	31282.1	61212.5	28380.6	30350.9	8455.88	24687.7	45601.9	74237.6	83286.7	11271.5	4957.47	24014.5	6455.38	219633	42650.7	19936.1	94339.2	97517.6	1467.46	1709.46
224	sp|P08603|CFAH_HUMAN.NTEILTGSWSDQTYPEGTQAIYK.+3	868.082	45.01	sp|P08603|CFAH_HUMAN	89363.4	95106.4	72699.4	113210	64443	141228	32515.9	182409	103471	85845	122832	203573	196735	211137	21488.3	88798.3	25616.8	7032.09	165177	74561.7	127397	248783	83039.4	89595.8
225	sp|P08603|CFAH_HUMAN.KGEWVALNPLR.+3	428.247	38.59	sp|P08603|CFAH_HUMAN	157672	309575	233802	369304	155824	232077	59581.5	379163	160100	62042.3	152572	701208	275595	411301	46109.7	209445	351657	79357.3	318140	231077	147097	421721	203043	181101
226	sp|P08603|CFAH_HUMAN.IVSSAMEPDR.+2	552.771	21.13	sp|P08603|CFAH_HUMAN	588282	373264	380715	593846	186976	104053	5795.83	81602.5	76174.9	7139.94	102442	178965	32678.9	89095.8	6657.79	28515.5	104406	35509.5	46250.9	40529.3	82811.7	75291.6	90390	56322
227	sp|P02787|TRFE_HUMAN.SASDLTWDNLK.+2	625.307	37.29	sp|P02787|TRFE_HUMAN	95360.7	101139	138269	106406	74488	203615	166925	176307	124700	1.08354e+06	489344	221502	229618	406127	124543	212867	125669	27963	225915	122271	138449	193983	303663	175670
228	sp|P02787|TRFE_HUMAN.HSTIFENLANK.+2	637.33	30.19	sp|P02787|TRFE_HUMAN	28616	26806.2	37238	28198.8	21737.3	54396.5	3932.07	46484.8	38152.7	511161	126540	68816	68990.9	130905	20446.1	36171.6	3925.23	21940.7	53666.4	20899.8	26966.5	21753.2	45989.1	24497.8
229	sp|P02787|TRFE_HUMAN.DGAGDVAFVK.+2	489.748	29.14	sp|P02787|TRFE_HUMAN	101734	91839.2	113818	114784	93723.4	125158	118764	130392	75290.5	365535	160409	266218	79361.8	227437	56705.2	82767	60061.5	132915	113864	119630	36350.7	49500	199497	88355.2
230	sp|P02787|TRFE_HUMAN.LAPNNLKPVVAEFYGSK.+3	616.34	41.98	sp|P02787|TRFE_HUMAN	65806.8	58665.5	92044.7	80112.3	48336.7	82902.6	44115.7	104520	69632.3	2933.29	298386	240909	11822.9	304222	48377.2	64368	37765.3	56529.2	37804.1	117143	48211	5866.84	210802	145941
231	sp|P02787|TRFE_HUMAN.EDLIWELLNQAQEHFGK.+3	690.681	59.27	sp|P02787|TRFE_HUMAN	30740.3	40118.4	52577.6	40752.5	28188.9	159836	25714.1	131229	65670.3	291948	224476	221645	180419	417312	123544	147116	0	74330.7	189494	61006	111629	88553.9	258857	180200
232	sp|P02787|TRFE_HUMAN.EDPQTFYYAVAVVK.+2	815.412	53.37	sp|P02787|TRFE_HUMAN	2029.29	26152.5	30812.5	20448.5	17018.2	97271.7	3504.54	75139.1	39960.8	598286	84158.9	16042.2	5755.93	73598.6	34628.5	53712.4	1535.69	23382.2	66421.8	31630.6	39886.1	8688.98	3179.32	1522.6
233	sp|P02787|TRFE_HUMAN.NLKPVVAEFYGSK.+3	484.601	35.15	sp|P02787|TRFE_HUMAN	42351	35572.2	44408.4	52965	40090.6	25055.6	8254.37	24359.5	39038.4	17267.5	148134	28863.9	21945.5	49157	41267.8	52147.4	20058.7	87382.4	36528.1	53769.3	19351.6	15214.6	194296	80086.7
234	sp|P02787|TRFE_HUMAN.DSAHGFLK.+2	437.724	19.92	sp|P02787|TRFE_HUMAN	27497	3056.2	34198.4	34203.4	17996.6	31132.1	30659	31269.6	28189.1	197221	101374	30380.3	44931.8	69605	27496.9	46150.7	40539.2	13971.6	38849.7	13126.4	15594.4	1095.65	35821.9	24809.8
235	sp|P02787|TRFE_HUMAN.SLDGGFVYIAGK.+2	613.824	41.18	sp|P02787|TRFE_HUMAN	25910.1	19684.4	24768.4	31667.5	28917.4	34900.5	15596.6	31497.1	24958.4	3638.69	72776.7	73726.5	25728.9	52446	12804.4	27490.1	2122.89	78661.2	23868	85458.1	2927.12	900.272	82203	56928.8
236	sp|P02787|TRFE_HUMAN.FDEFFSEGC[CAM]APGSK.+2	789.332	38.34	sp|P02787|TRFE_HUMAN	17292	18604	23789.4	29408.7	16189.9	73131.8	2578.85	17955.8	28145.1	109087	147957	32153.1	55417	85442.6	35780.5	33265.2	47539.3	16821.4	30431.2	9755	54108.2	24370.9	42434.5	17409
237	sp|O94985-2|CSTN1_HUMAN.IPDGVVSVSPK.+2	549.314	29.95	sp|O94985-2|CSTN1_HUMAN	174827	237523	128874	156666	209708	188317	89678.1	227534	200416	128467	292302	600148	316648	349127	150340	137953	348423	98015.9	238680	103540	186342	346011	161106	190316
238	sp|O94985-2|CSTN1_HUMAN.IHGQNVPFDAVVVDK.+3	546.626	35.3	sp|O94985-2|CSTN1_HUMAN	538089	677148	338941	417339	563667	600986	224481	968718	750419	366954	805134	2.01855e+06	970890	1.24289e+06	403558	426545	1.21994e+06	256648	951563	394710	481415	870823	338096	455545
239	sp|O94985-2|CSTN1_HUMAN.ATVHIQVNDVNEYAPVFK.+3	682.021	42.16	sp|O94985-2|CSTN1_HUMAN	172412	284671	138398	179059	259697	360108	77682.6	529511	13079.4	237058	408182	1.46101e+06	638716	794458	306645	208963	776286	303477	635113	195572	283852	538559	252364	441963
240	sp|O94985-2|CSTN1_HUMAN.GVQIQAHPSQLVLTLEGEDLGELDK.+3	897.14	51.76	sp|O94985-2|CSTN1_HUMAN	179912	214846	102416	131029	170934	217561	77248.8	396509	350526	122209	288956	913188	390972	545575	147716	141398	4993.61	59750	337561	99038.9	196893	355803	150267	241369
241	sp|O94985-2|CSTN1_HUMAN.EGLDLQVLEDSGR.+2	715.86	45.09	sp|O94985-2|CSTN1_HUMAN	224977	285537	142377	173918	276828	84999.5	59869.9	151662	197882	15584.8	111246	1.10882e+06	84332.7	190831	53845.4	59288.3	173315	196913	107966	266541	52773.2	138452	179872	112552
242	sp|O94985-2|CSTN1_HUMAN.IEYEPGTGALAVFPN.+2	789.396	51.33	sp|O94985-2|CSTN1_HUMAN	50667.6	68450.5	35270.7	39391.2	51929.5	8471.76	7530.05	66425.4	71262.3	8396.78	67535.8	197870	32120.6	84522.6	19942.4	3594.25	6988.28	30848.6	26704.6	47157.8	26133.2	51524.2	34499.5	52359.4
243	sp|O94985-2|CSTN1_HUMAN.ISLSGVHHFAR.+3	408.56	34.22	sp|O94985-2|CSTN1_HUMAN	3854.88	34877.2	25756.1	37444.4	39675.4	91784.9	34937.4	143947	46700.4	102559	100650	170632	198376	188747	89252.3	83083.7	280433	48357	176706	45580.4	60157.6	90308.8	71597.7	114450
244	sp|O94985-2|CSTN1_HUMAN.AASEFESSEGVFLFPELR.+2	1007.99	59.35	sp|O94985-2|CSTN1_HUMAN	12442.1	61055.7	23171.5	33172.3	46245.4	93897.2	82312.2	172365	161743	76612.8	192256	374056	177921	252359	74501.5	71657	122.251	79734.9	165994	65312.4	99714.4	203080	96522.8	153384
245	sp|O94985-2|CSTN1_HUMAN.HKPWLEPTYHGIVTENDNTVLLDPPLIALDK.+4	885.47	51.27	sp|O94985-2|CSTN1_HUMAN	57787.8	69823.4	33446.2	41015.7	52538.1	59071.9	6663.03	88681.1	7077.19	20396.9	13396.8	224037	90614.6	109713	4118.65	27652	1539.87	3886.56	82978.6	22514.6	40925.3	75132.3	37780.6	54186.8
246	sp|P05155|IC1_HUMAN.LLDSLPSDTR.+2	558.798	31.34	sp|P05155|IC1_HUMAN	2.04845e+06	2.18948e+06	1.78731e+06	2.75348e+06	1.72554e+06	3.31285e+06	706034	4.33271e+06	2.77062e+06	2.05546e+06	3.89847e+06	5.56186e+06	4.48808e+06	5.75666e+06	1.52258e+06	2.48782e+06	2.41437e+06	1.35029e+06	2.73597e+06	1.58015e+06	3.74519e+06	4.89321e+06	2.1035e+06	2.09114e+06
247	sp|P05155|IC1_HUMAN.GVTSVSQIFHSPDLAIR.+3	609.663	45.71	sp|P05155|IC1_HUMAN	226829	853380	560854	696400	490027	1.78487e+06	219108	2.17291e+06	1.39695e+06	1.17695e+06	2.38051e+06	2.50338e+06	3.00992e+06	3.68013e+06	959047	1.52914e+06	16871.2	588219	2.81257e+06	618669	2.18283e+06	3.15175e+06	1.02422e+06	1.54429e+06
248	sp|P05155|IC1_HUMAN.VTTSQDMLSIMEK.+2	741.862	41.97	sp|P05155|IC1_HUMAN	622632	316872	539001	694840	203262	327362	2090.32	154296	196342	5463.2	612296	423341	138626	377696	9270.48	83460.3	111544	67652	60932.9	100916	251880	265762	230107	60159.4
249	sp|P05155|IC1_HUMAN.LEDMEQALSPSVFK.+2	797.395	46.04	sp|P05155|IC1_HUMAN	363876	343598	403376	524534	222850	240254	21767.1	178708	253833	45888.1	686006	635591	166601	448431	32222.4	86293	241447	139394	217254	145808	352042	313000	281248	184207
250	sp|P05155|IC1_HUMAN.TNLESILSYPK.+2	632.843	44.94	sp|P05155|IC1_HUMAN	1.20993e+06	908182	1.02245e+06	1.28888e+06	780670	1.22205e+06	448735	1.48288e+06	1.05426e+06	862769	1.74753e+06	2.48549e+06	1.88951e+06	2.45479e+06	465194	921058	1.20413e+06	617375	1.72496e+06	893258	1.55594e+06	2.15388e+06	1.07636e+06	996742
251	sp|P05155|IC1_HUMAN.SIASLLTQVLLGAGENTK.+3	605.679	60.41	sp|P05155|IC1_HUMAN	864074	735662	892763	1.0574e+06	674165	1.4257e+06	14272.6	1.68334e+06	1.75462e+06	35984.8	1.64945e+06	2.60378e+06	1.91576e+06	2.65452e+06	1.03113e+06	1.36126e+06	0	127376	1.28392e+06	705373	2.13194e+06	2.51292e+06	1.30209e+06	1.47833e+06
252	sp|P05155|IC1_HUMAN.FQPTLLTLPR.+2	593.353	46.38	sp|P05155|IC1_HUMAN	708847	464338	619465	412920	244330	2.03255e+06	865179	2.01268e+06	518337	2.02462e+06	802727	637552	1.50169e+06	533920	13172.2	606920	8232.95	2488.4	1.86757e+06	195036	339736	716350	3328.91	459343
253	sp|P05155|IC1_HUMAN.DFTC[CAM]VHQALK.+2	609.8	26.37	sp|P05155|IC1_HUMAN	164069	148875	166991	222757	123701	252054	54718.7	324799	198916	105983	193235	173361	246193	199290	85881	157017	171138	45103.1	199144	51975.5	189245	254985	74495.2	114572
254	sp|P05155|IC1_HUMAN.GVTSVSQIFHSPDLAI.+2	835.941	53.55	sp|P05155|IC1_HUMAN	380746	198449	278768	303118	204807	42451.8	864.71	80231.9	84133.5	1117.3	48842.9	288335	12141.2	54394.6	14997.1	6796.69	261.661	26209	6114.75	133614	48629.1	64571.4	175996	17563.7
255	sp|P05155|IC1_HUMAN.LVLLNAIYLSAK.+2	659.411	53.75	sp|P05155|IC1_HUMAN	322375	221092	351349	308630	242552	727071	138025	811602	132740	709276	309477	854991	1.60855e+06	1.1708e+06	280310	327701	512.553	169572	617983	239488	893191	1.13268e+06	202097	522057
256	sp|Q96KN2|CNDP1_HUMAN.VFQYIDLHQDEFVQTLK.+3	708.365	48	sp|Q96KN2|CNDP1_HUMAN	112585	102677	117387	147680	66172.8	100390	22245.1	248651	306004	73208	347654	324156	229216	414776	54005	58513.6	1234.37	28590.8	150829	128161	217893	251830	99418.7	94334.4
257	sp|Q96KN2|CNDP1_HUMAN.SPSPPPALLEK.+2	568.322	30.59	sp|Q96KN2|CNDP1_HUMAN	61290.2	52500	72810.2	52867.5	26661	50558.8	27694.9	164647	84290.8	1832.16	95621.5	54175.7	67134.1	222216	9770.42	16610.7	99253.1	5380.17	28129.6	18902.8	90650.2	82149.3	18890.8	32366.9
258	sp|Q96KN2|CNDP1_HUMAN.VFQYIDLHQDEFVQTLK.+2	1062.04	48	sp|Q96KN2|CNDP1_HUMAN	30539	22365	24126.8	29827.3	15942.4	25945.7	9748.59	55151.8	60400.7	10758.2	55478.2	58835.4	37937	74285.9	5020.15	17664.9	10028.1	7504.95	28594.8	22124.1	40748.9	54360.2	20973.1	19383.2
259	sp|Q96KN2|CNDP1_HUMAN.IDLHQDEFVQTLK.+3	529.279	47.97	sp|Q96KN2|CNDP1_HUMAN	2439.89	1744.74	739.121	4530.82	810.992	3363.55	293.197	8755.1	9669.38	7783	12178.6	25080.9	7224.2	5193.02	556.015	2919.1	7477.82	2360.15	2998	16648.7	546.904	8456.13	4677.52	4481.59
260	sp|P01009|A1AT_HUMAN.LSITGTYDLK.+2	555.806	36.71	sp|P01009|A1AT_HUMAN	198883	291062	208438	218227	185892	886430	197304	644585	506903	2.40974e+06	823635	516097	1.35399e+06	1.9839e+06	317210	448031	756241	177375	983886	297101	1.15902e+06	915512	1.14356e+06	767226
261	sp|P01009|A1AT_HUMAN.SVLGQLGITK.+2	508.311	39.75	sp|P01009|A1AT_HUMAN	279594	570325	323183	339318	292210	942148	167016	814284	757329	1.84565e+06	1.08954e+06	704858	1.2962e+06	2.38119e+06	398837	624414	1.18973e+06	262245	1.25054e+06	431275	1.33959e+06	1.19859e+06	1.36956e+06	878313
262	sp|P01009|A1AT_HUMAN.LQHLENELTHDIITK.+3	601.991	34.26	sp|P01009|A1AT_HUMAN	45291.3	97911.6	36774.2	66163.3	58675.5	185719	22445.5	167021	89121.3	151667	170346	175896	293632	625239	62131.1	117779	237900	47539.2	238924	62640.7	294765	232186	276221	178893
263	sp|P01009|A1AT_HUMAN.VFSNGADLSGVTEEAPLK.+2	917.465	40.42	sp|P01009|A1AT_HUMAN	42438.7	44011	39065	26448.3	33076.3	388319	76047.5	275146	125067	865274	327985	270869	394203	500183	32214.2	143164	422163	45443.1	358055	109378	408406	236898	297699	254398
264	sp|P01009|A1AT_HUMAN.SASLHLPK.+2	426.75	21.83	sp|P01009|A1AT_HUMAN	54656.2	81427	48436.3	52004.4	45273.2	115793	31078.3	121176	104885	376116	74523.5	40933.5	66320.1	157155	28932.6	58095.9	88764.2	11634	57913.2	8007.17	81001	67680.2	106627	63600.1
265	sp|P01009|A1AT_HUMAN.DTEEEDFHVDQVTTVK.+3	631.29	32.89	sp|P01009|A1AT_HUMAN	116601	227564	133529	138342	62767	275850	48306.8	248269	251483	473662	16218.7	129615	508911	468087	147815	221886	412413	106030	401385	131777	435488	17150.4	486334	108300
266	sp|P01009|A1AT_HUMAN.TVNFGDTEEAK.+2	605.783	23.25	sp|P01009|A1AT_HUMAN	99302.5	142327	85450.6	121524	117447	133904	7141.88	182923	204635	1185.36	187979	177177	52479.3	412694	64150.4	72627.8	12635.4	92892	53612.3	135817	120920	113042	447929	220121
267	sp|P01009|A1AT_HUMAN.LYHSEAFTVNFGDTEEAK.+3	686.653	38.23	sp|P01009|A1AT_HUMAN	92147.1	167204	91072.2	74253.8	50741.2	268202	92822.6	219059	176283	294962	258801	157271	491927	491795	104584	222231	368034	22815.2	536445	56961.5	411876	443466	116827	193411
268	sp|P01009|A1AT_HUMAN.GLFLSEGLK.+2	482.279	41.13	sp|P01009|A1AT_HUMAN	49911.1	72669.1	46832.5	53884.4	50514.6	77906.1	32412.2	87674.5	92493.2	16836	142351	185780	55246.6	432138	36548.8	16735.9	49663.7	105400	65432.7	133163	116908	134941	379083	154704
269	sp|P01009|A1AT_HUMAN.TDTSHHDQDHPTFNK.+4	445.697	11.46	sp|P01009|A1AT_HUMAN	26516.6	45426.5	9643.28	34680.3	19048.7	13011	9139.9	16703.7	7356.81	4174.44	11773.7	13643.9	10435.1	23589.3	5216.53	14951	690.79	8786.72	13030.8	1933	11673.6	12981.4	39493.4	23942
270	sp|Q12860|CNTN1_HUMAN.TTKPYPADIVVQFK.+3	536.299	39.03	sp|Q12860|CNTN1_HUMAN	315346	396244	281843	324801	364421	410007	133465	492268	421974	144561	536544	999180	529331	726386	189292	340012	669829	208090	647898	317563	407053	559775	310158	356256
271	sp|Q12860|CNTN1_HUMAN.VLEPMPSTAEISTSGAVLK.+2	965.514	43.34	sp|Q12860|CNTN1_HUMAN	162223	164683	124478	133860	85001.8	67184.5	375.805	43622.7	89045.1	16039.9	232010	182055	38205	80460.5	4663.14	13185.8	61877.5	18179.6	55632.6	31732.8	61439.9	54093.8	82976.3	22646.7
272	sp|Q12860|CNTN1_HUMAN.VTVTNPDTGR.+2	530.275	17.55	sp|Q12860|CNTN1_HUMAN	153549	167355	117580	166076	201960	87539.6	83353.7	130399	135944	64256.9	115323	130909	62152.6	96116.4	56672.5	87594.3	130734	45455.7	105580	60928.9	56391.7	73029.8	62644.6	71241.9
273	sp|Q12860|CNTN1_HUMAN.STEATLSFGYLDPFPPEERPEVR.+3	879.766	51.66	sp|Q12860|CNTN1_HUMAN	41545.2	94341.2	54627	68612.6	65554.6	142102	77991.3	188585	200816	108625	234552	338031	244923	148263	74371.5	97273.3	1307.75	47148.6	214298	79930.9	186466	198556	108711	132382
274	sp|Q12860|CNTN1_HUMAN.IVESYQIR.+2	504.28	25.86	sp|Q12860|CNTN1_HUMAN	145948	204136	130954	144310	157809	313791	64125.2	395808	323292	118396	341546	432674	364338	421447	131963	222074	436623	76166.6	321056	126582	220684	314023	74809	167760
275	sp|Q12860|CNTN1_HUMAN.VLSSSEISVHWEHVLEK.+4	495.511	40.43	sp|Q12860|CNTN1_HUMAN	54395.5	67087.8	44450.5	40906.5	50072.7	54930.3	1173.95	89145.7	29244.1	23766.1	54507.1	181910	93110.8	126911	17427.9	26853.7	75991.3	13836.1	69693.6	20824.3	59520.3	111151	21373.4	35534.1
276	sp|Q12860|CNTN1_HUMAN.ILALAPTFEMNPMK.+2	788.417	51.87	sp|Q12860|CNTN1_HUMAN	271880	245516	207007	259024	101893	94640.4	8388.08	30407.2	111264	9280.92	255668	182899	7401.37	94071.6	5634.25	36764.3	2496.65	28992	25394.8	15435.4	55701.9	36898.8	89812.6	6681.64
277	sp|Q12860|CNTN1_HUMAN.GFGPIFEEQPINTIYPEESLEGK.+3	865.427	55.37	sp|Q12860|CNTN1_HUMAN	236627	256264	187207	221287	268813	175802	132178	337306	399148	1902.91	443127	724217	195929	446486	146751	186118	1405.66	208896	349794	257864	243546	261777	277009	298369
278	sp|Q12860|CNTN1_HUMAN.WLLNEFPVFITMDK.+2	876.955	59.71	sp|Q12860|CNTN1_HUMAN	67807.3	3383.44	43372	36054.2	33358.7	43042.2	436.121	3034.85	71643.1	28088.5	57991.7	90054.7	51857.8	59530.1	13558.6	12729.3	0	10579.1	44058.6	16220	36757.2	48668.8	15263	32023.8
279	sp|Q12860|CNTN1_HUMAN.HSIEVPIPR.+2	524.301	30.09	sp|Q12860|CNTN1_HUMAN	76379.8	79399.8	52136.1	65907.7	73627	59595.7	17480.1	80077.8	79310.2	12976.1	77841.5	183609	54010.5	94447.5	15133.7	21791.1	59394.6	19946.3	36032.8	33175.4	67520.6	88314.8	40886.1	37946.7
280	sp|P01034|CYTC_HUMAN.ALDFAVGEYNK.+2	613.806	37.58	sp|P01034|CYTC_HUMAN	8.10656e+06	1.18846e+07	7.01973e+06	1.00215e+07	8.63959e+06	9.98052e+06	7.99613e+06	1.24011e+07	1.21994e+07	5.33576e+06	1.09674e+07	2.32629e+07	9.53693e+06	1.31394e+07	4.52524e+06	9.55711e+06	1.29055e+07	8.60772e+06	1.2957e+07	8.5816e+06	1.06641e+07	1.37568e+07	7.08621e+06	7.85252e+06
281	sp|P01034|CYTC_HUMAN.LVGGPMDASVEEEGVR.+2	822.899	34.15	sp|P01034|CYTC_HUMAN	1.14041e+07	1.45814e+07	9.10448e+06	1.42385e+07	7.62351e+06	4.12707e+06	468554	3.65322e+06	5.92411e+06	93959.3	6.98131e+06	1.61942e+07	1.53105e+06	5.20077e+06	287274	1.37793e+06	4.51093e+06	3.22284e+06	2.93272e+06	2.96028e+06	4.34212e+06	4.09677e+06	3.58024e+06	2.19207e+06
282	sp|P01034|CYTC_HUMAN.AVPWQGTMTLSK.+2	659.845	39.29	sp|P01034|CYTC_HUMAN	999896	1.66622e+06	1.01762e+06	1.03527e+06	341799	1.07114e+06	7481.59	760148	784529	5295.06	2.01575e+06	2.77489e+06	599037	1.37754e+06	110365	448383	1.42237e+06	50633.4	887080	146650	1.31496e+06	1.20948e+06	221131	442513
283	sp|P01034|CYTC_HUMAN.TQPNLDNC[CAM]PFHDQPHLK.+4	515.996	28.55	sp|P01034|CYTC_HUMAN	2.33301e+06	3.71023e+06	1.97663e+06	3.39839e+06	2.42195e+06	3.77261e+06	1.10549e+06	4.73348e+06	3.53414e+06	1.93688e+06	2.57985e+06	7.18714e+06	3.82449e+06	4.52019e+06	1.15353e+06	3.86253e+06	5.08509e+06	1.98011e+06	4.03266e+06	1.30765e+06	3.39856e+06	4.94692e+06	755045	2.16421e+06
284	sp|P01034|CYTC_HUMAN.LVGGPMDASVEEEGVRR.+3	600.968	29.95	sp|P01034|CYTC_HUMAN	491955	571241	448114	278979	78761.4	369864	16727	150774	156759	505177	175190	36322.8	521186	6590.24	21308.9	174156	13735.7	7852.8	332768	15589.2	289699	360925	18659.8	1623.36
285	sp|P01034|CYTC_HUMAN.TQPNLDNC[CAM]PFHDQPHL.+3	644.96	35.16	sp|P01034|CYTC_HUMAN	1.58246e+06	1.20413e+06	770415	1.24401e+06	894887	574296	4278.55	847407	914887	8649.64	2105.23	1.54286e+06	11431.6	27775.1	27559.3	4032.5	112315	8819.78	12562.5	487850	253266	840411	13311.6	3614.51
286	sp|P01034|CYTC_HUMAN.YFLDVELGR.+2	556.293	46.08	sp|P01034|CYTC_HUMAN	218340	646643	284337	657722	633392	371394	32623.5	788598	489508	98509	309801	2.67768e+06	175079	1.1637e+06	211315	277035	6516.2	1.16921e+06	220096	431923	451559	559883	673043	750092
287	sp|P01034|CYTC_HUMAN.RLVGGPMDASVEEEGVR.+3	600.968	30.96	sp|P01034|CYTC_HUMAN	814042	1.20026e+06	737337	484477	115382	322427	110882	150152	190483	264655	266908	279973	683488	145571	40587.4	164519	151645	9783.11	311377	24575.8	553867	512263	49169.9	34960.3
288	sp|P01034|CYTC_HUMAN.ALDFAVGEYN.+2	549.759	44.71	sp|P01034|CYTC_HUMAN	280279	198017	130375	184929	173262	128160	17302.4	221931	118145	27777.7	36938.6	459674	3852.2	71692.9	6128.48	44236.1	27398.8	66805.7	12440.1	235188	47791.3	168031	56559.1	92368
289	sp|P01034|CYTC_HUMAN.DASVEEEGVR.+2	545.754	23.14	sp|P01034|CYTC_HUMAN	210136	420139	431885	420277	960226	222320	171162	226246	668665	63901.6	93879.2	624247	301088	511666	57556.5	399714	462955	693429	124591	362522	277219	458768	212600	281471
290	sp|P05067-8|A4_HUMAN.VESLEQEAANER.+2	687.828	25.08	sp|P05067-8|A4_HUMAN	327048	360890	242262	271946	446368	210162	141050	509985	962532	129881	527431	653776	305369	281344	58994.6	247069	505030	205108	326636	155154	55797.9	403413	169462	128001
291	sp|P05067-8|A4_HUMAN.THPHFVIPYR.+3	422.896	28.55	sp|P05067-8|A4_HUMAN	71667.7	315709	143771	248730	224527	490149	132067	762206	457439	446394	354982	1.07372e+06	914366	759515	77519.8	395603	843382	166757	805363	103336	332026	872602	197684	300929
292	sp|P05067-8|A4_HUMAN.AVIQHFQEK.+2	550.298	18.18	sp|P05067-8|A4_HUMAN	67366.1	49821.8	42828.9	48172.1	71178.6	26128.1	14158.2	65095.1	97548.4	19665.3	63058.8	84177	67718.5	39791.2	11794.6	37143	81243.2	33842.5	62114.7	41545	12179.8	63687.8	29400	22750.2
293	sp|P05067-8|A4_HUMAN.YLETPGDENEHAHFQK.+4	479.471	22.22	sp|P05067-8|A4_HUMAN	85795.3	118471	72732.2	89229	122354	52936.1	11213.6	115055	100846	25839.4	32498.5	162937	53068.8	54110.1	12355.5	48646	123994	30930.4	67968.2	28024.7	12069.4	51401.5	29650.1	23780.2
294	sp|P05067-8|A4_HUMAN.PGSGLTNIK.+2	443.753	20.69	sp|P05067-8|A4_HUMAN	115265	124056	74568.9	99153.2	134150	37765.3	4096.79	80204.5	140699	3516.8	71690	132416	21358.7	55124.2	12338.8	33788.2	56096.4	36879.9	22550.2	27620.1	11527	54791.2	39782.9	27132.6
295	sp|P05067-8|A4_HUMAN.STNLHDYGMLLPC[CAM]GIDK.+3	645.31	42.6	sp|P05067-8|A4_HUMAN	75108.2	82340.8	58407.2	45061.2	27355.1	199915	27587.2	146253	213226	63375.8	318371	161749	148079	119697	11653.3	80400.9	434730	8920.71	212895	10722	128095	268449	8768.85	25855.5
296	sp|P05067-8|A4_HUMAN.ISYGNDALMPSLTETK.+2	870.43	42.19	sp|P05067-8|A4_HUMAN	50870.9	63375.8	49035	44083.3	53874.8	17050.6	10209.4	18910.1	59216.7	15605	89922	73653.7	3891.05	3148.74	1343.04	9375.89	32417.3	16515.6	5780.31	11924.5	953.495	30336	17233	4857.46
297	sp|P05067-8|A4_HUMAN.WYFDVTEGK.+2	572.769	42.22	sp|P05067-8|A4_HUMAN	62920.7	39781.3	46179.2	46999.7	52883.5	56745.4	21728.9	62717.5	84336.1	11636.1	66106.7	123226	60342.7	58636.5	12687.8	25629.9	64536.5	23314	82076.2	39874.7	9690.45	47553.8	39500	29650.4
298	sp|P05067-8|A4_HUMAN.LVFFAEDVGSNK.+2	663.341	43.02	sp|P05067-8|A4_HUMAN	98587.4	76686.4	41756.6	81721.8	84586.4	60199.2	41314.3	56824.8	41841.7	33562	57760.9	127767	48081.7	65768.8	18225.2	42391.7	145550	54326.9	58133.7	40221.8	16658.7	60090.5	46770.9	16972.2
299	sp|P05067-8|A4_HUMAN.NVPAVAEEIQDEVDELLQK.+3	713.699	59.88	sp|P05067-8|A4_HUMAN	19796.5	21914.6	14793.7	20374	31614.1	9435.02	1801.76	28464.3	104608	3517.43	82061.8	126553	30963	51340.6	11208.7	24352.9	0	78327.5	20601.8	38268.6	7489.59	53792.4	61638.1	24076.6
300	sp|P00747|PLMN_HUMAN.VILGAHQEVNLEPHVQEIEVSR.+4	624.836	21.66	sp|P00747|PLMN_HUMAN	3262.33	233442	93544.3	167362	52794	408440	7880.77	460018	179013	232247	148783	192256	879155	696364	89618.1	405878	430195	4412.32	605191	24691.1	355134	554246	236449	244224
301	sp|P00747|PLMN_HUMAN.EAQLPVIENK.+2	570.817	37.72	sp|P00747|PLMN_HUMAN	11124.5	466394	264244	10222.2	2730.21	15487.9	24899.6	13915	23769	893.313	5853.52	3649.52	6518.54	1.10252e+06	4577.56	5345.71	4786.41	186018	587736	9538.14	511.069	2214.92	2322.01	2225.63
302	sp|P00747|PLMN_HUMAN.LSSPAVITDK.+2	515.793	26.68	sp|P00747|PLMN_HUMAN	296039	342551	207918	310178	150583	532898	93015.8	686458	310436	290426	207494	369064	734367	675885	110836	397268	413674	90996.4	440335	178099	260021	395424	338467	301963
303	sp|P00747|PLMN_HUMAN.HSIFTPETNPR.+3	433.554	24.29	sp|P00747|PLMN_HUMAN	324956	356426	235567	355204	168078	444832	55897.4	569223	337085	184420	215267	406176	740052	736980	113769	443641	443496	110618	445071	181048	225214	326514	434756	196983
304	sp|P00747|PLMN_HUMAN.VILGAHQEVNLEPH.+3	519.279	32.02	sp|P00747|PLMN_HUMAN	62973.9	70638.1	1572.93	90509.8	75891.5	64723.2	12113	120337	39998.1	24397.3	25951.7	270656	1858.72	158448	11694.6	46018.2	69338.9	159936	9610	192243	23237.5	39535.4	226627	141948
305	sp|P00747|PLMN_HUMAN.VIPAC[CAM]LPSPN.+2	534.281	37.52	sp|P00747|PLMN_HUMAN	107247	10429.3	19156.7	6936.28	10883.5	247204	16304.7	307603	133574	1673	64617.8	145424	94259.1	206842	28233.9	241632	154517	10589.9	50526.9	65268.1	141452	258263	35563.9	72753.4
306	sp|P00747|PLMN_HUMAN.EPLDDYVNTQGASLFSVTK.+2	1042.51	49.59	sp|P00747|PLMN_HUMAN	20391.4	37426.2	20871.6	27227	13817.2	82753.3	13331.3	81661	36041.8	58583.3	25192.8	21945.1	96592.1	47200.2	696.865	30434.3	4842.71	1228.4	79332.3	15492.8	21326.5	37215.3	11547.9	55828.9
307	sp|P00747|PLMN_HUMAN.VVGGC[CAM]VAHPHSWPWQVSLR.+4	543.778	42.15	sp|P00747|PLMN_HUMAN	2360.09	7470.56	230.355	2853.72	641.658	93062.7	407.029	60748.7	2081.55	200974	35987	2992.97	490804	77062.6	12532.4	88420	1679.55	1447.5	292622	611.507	68402.9	1765.89	611.017	1449.87
308	sp|P00747|PLMN_HUMAN.VIPAC[CAM]LPSPNYVVADR.+2	885.964	42.97	sp|P00747|PLMN_HUMAN	17651.5	26441.3	13947.4	11059.8	1742.63	439137	9822.84	281629	61871.6	155609	26547.8	30728.4	484136	129079	22173.2	318976	468794	1443.85	298735	1556.9	132233	266660	3093.89	24471.3
309	sp|P00747|PLMN_HUMAN.EPLDDYVNTQGASLF.+2	834.891	42.23	sp|P00747|PLMN_HUMAN	2437.09	8185.72	10420.7	10245.4	12357.1	843.157	4785.51	13051.7	13992.7	5526.1	599.111	8043.52	36336.1	2954.36	8602.24	1229.62	4172.97	10772.6	19934.6	2702.99	3102.28	28274.6	29861.5	16472.4
310	sp|Q14515|SPRL1_HUMAN.SSSQELGLK.+2	474.753	20.34	sp|Q14515|SPRL1_HUMAN	553798	482883	418582	560373	691115	447695	274562	444938	314587	14935.4	223315	1.01082e+06	185797	528171	104982	179764	371594	215562	230745	210449	90833.4	336326	521303	490111
311	sp|Q14515|SPRL1_HUMAN.VLTHSELAPLR.+3	412.575	27.42	sp|Q14515|SPRL1_HUMAN	87215.9	182041	141690	190270	171592	379113	160354	598936	288025	81820.3	405994	623400	422159	290668	157843	155992	440706	138543	463610	172259	130442	222049	316428	194579
312	sp|Q14515|SPRL1_HUMAN.LLAGDHPIDLLLR.+3	482.621	47.17	sp|Q14515|SPRL1_HUMAN	27514.3	208996	128935	175995	159755	681962	140780	946012	599484	332681	1.22878e+06	1.54423e+06	1.75712e+06	1.55527e+06	410197	616844	585.408	422929	1.65821e+06	239202	507679	923227	610341	578827
313	sp|Q14515|SPRL1_HUMAN.LSENTDFLAPGVSSFTDSNQQESITK.+3	939.114	46.94	sp|Q14515|SPRL1_HUMAN	149854	160449	122532	132837	144320	181852	117939	217242	156650	14112.6	202419	503735	176218	310252	45880.2	110927	3982.6	91114.9	210274	121345	74666.5	219142	192057	163051
314	sp|Q14515|SPRL1_HUMAN.HIQETEWQSQEGK.+3	533.918	19.6	sp|Q14515|SPRL1_HUMAN	459747	380720	298605	408577	454932	160689	80342.3	228249	239955	57197.1	283608	696813	326644	368156	13205.3	157123	363687	180284	252850	121823	29222.8	119191	398733	169307
315	sp|Q14515|SPRL1_HUMAN.LLAGDHPIDLLL.+2	645.377	55.46	sp|Q14515|SPRL1_HUMAN	595988	485924	555268	528075	588111	218281	19321.1	439824	336263	43729.8	224067	1.04486e+06	28009	144658	35323.4	66008.6	696.434	149370	43083.9	486555	81942.6	273621	606514	33967.7
316	sp|Q14515|SPRL1_HUMAN.DQEDSDGHLSVNL.+2	714.816	33.34	sp|Q14515|SPRL1_HUMAN	5832.91	12547	5821.23	664.777	1653.23	30120.7	3578.55	8246.07	1473.88	11844.9	5323.96	27576.9	7788.07	37839.9	3461.44	15269.5	5244.69	4927.93	8118.21	4575.06	10665.5	5578.39	18476.2	2485.87
317	sp|Q14515|SPRL1_HUMAN.NILMQLYEANSEHAGYLNEK.+3	779.711	48.77	sp|Q14515|SPRL1_HUMAN	102484	91258.3	85829.4	80022.4	57331.3	90631	10313.4	101590	92036.7	24654.3	179010	192961	151984	127672	16348.8	25105.9	3634.86	7179.32	124596	27532.1	40023.2	89427.4	57864.3	38028.6
318	sp|Q14515|SPRL1_HUMAN.HSASDDYFIPSQAFLEAER.+3	728.34	46.73	sp|Q14515|SPRL1_HUMAN	236912	259248	180464	189734	210274	203657	42244	237952	209662	47881.8	246414	505251	258843	253223	59112.2	116026	1669.5	84311.5	238148	93327	103231	258267	231818	120417
319	sp|Q14515|SPRL1_HUMAN.AQSIAYHLK.+2	515.788	21.36	sp|Q14515|SPRL1_HUMAN	32290.6	44736.3	39793.7	42092	56346.6	68644.3	51650.2	83305.5	45776.5	41966.8	39774.1	54501.9	79650.5	32300.5	13794.6	56076.6	116179	18120.8	73311.1	22642.4	24083.6	27954.4	6169.6	24442.8
320	tr|B1AHL2|B1AHL2_HUMAN.HLSFPTNIQAPAVVFR.+3	599.665	47.32	tr|B1AHL2|B1AHL2_HUMAN	24753.2	117563	56961.4	69567.9	57393.2	157863	14979	292527	314288	132572	895302	1.03271e+06	530565	1.36323e+06	355023	302779	179691	170176	338023	78951.3	689138	608614	546906	313529
321	tr|B1AHL2|B1AHL2_HUMAN.ITYYHLSFPTNIQAPAVVFR.+3	779.751	55.22	tr|B1AHL2|B1AHL2_HUMAN	16754.2	30716.1	23977.6	12350.8	30383.5	227476	37665.8	262438	94046	318589	200825	119809	620025	172804	49931.5	176039	750.177	25996.8	459412	52361.7	215279	206409	18736.5	122747
322	tr|B1AHL2|B1AHL2_HUMAN.VSPHSGVVAL.+2	483.274	29.49	tr|B1AHL2|B1AHL2_HUMAN	116094	111025	84811	77644.8	81258.5	156781	36193.6	252925	183799	19117.6	178996	227116	126722	221688	57646.7	110776	15543.7	26731.2	121667	51954.7	153774	211444	88169.4	64258.9
323	tr|B1AHL2|B1AHL2_HUMAN.HLSFPTNIQAPAVVF.+2	820.943	54.61	tr|B1AHL2|B1AHL2_HUMAN	139446	125340	115336	103252	130279	30787.6	5118.51	80816.2	169812	1575.64	98790.4	363868	10121.5	65627.3	17871	22025.5	969.719	36165.9	2555.19	89576.8	68212.4	152641	220221	8964.33
324	tr|B1AHL2|B1AHL2_HUMAN.VSPHSGVVALTKPVPEPR.+4	468.269	21.28	tr|B1AHL2|B1AHL2_HUMAN	1802.83	1210.46	1411.23	4628.84	2075.77	40356.6	42823.5	27526.7	13468.9	158214	4287.94	3603.55	185000	5657.34	20492.5	28014.2	154081	13713.5	104921	9168.77	156.834	7458.66	9713.28	5737.37
325	tr|B1AHL2|B1AHL2_HUMAN.VSPHSGVVALTK.+2	597.846	22.02	tr|B1AHL2|B1AHL2_HUMAN	3474.55	4248.89	2937.89	155.699	3397.6	12246	2825.09	28897.1	13181	2128.12	11788.4	7012.9	10703	16962.3	5021.65	12000.3	10228.4	885.837	13141.5	896.512	7109.62	9829.08	2428.2	2626.8
326	tr|B1AHL2|B1AHL2_HUMAN.ITYYHLSFPTNIQAPAVVF.+3	727.717	57.83	tr|B1AHL2|B1AHL2_HUMAN	18535.2	17285.8	10171.7	8999.32	10421.9	30059.7	9228.66	48286.4	26956.9	12894.1	11607.8	19995.6	1286.56	4346.58	496.871	2007.32	0	3648.87	9287.53	11884.9	15711.5	28205.9	1795.16	3387.01
327	tr|B1AHL2|B1AHL2_HUMAN.MGPSSAVPGDSMQLAITGGNEEGFFTTR.+3	953.109	52.65	tr|B1AHL2|B1AHL2_HUMAN	13001.4	40796.8	26307.6	25685.5	9602.8	38550.7	12702.5	34660.6	28878.4	15918	96896.2	72557.9	35506.6	42550.3	4813.81	19753.6	4709.31	8954.19	38112.1	19967	37714.4	49431.1	32174	18484.2
328	tr|B1AHL2|B1AHL2_HUMAN.SFPTNIQAPAVVFR.+2	773.923	57.11	tr|B1AHL2|B1AHL2_HUMAN	22653.8	3444.49	2255.46	3212.14	1168.74	642.22	846.227	15234.4	18165.1	2874.49	42274.7	39806.3	6339.31	748.802	9871.78	691.407	4887.24	2872.97	2517.79	2225.05	23155.2	296.158	17812.3	1330.33
329	sp|P02765|FETUA_HUMAN.HTLNQIDEVK.+2	598.817	20.89	sp|P02765|FETUA_HUMAN	567897	598276	426474	552826	273822	506261	53539.7	791497	337567	129922	201098	162323	388825	337569	28555.4	224974	328827	34608.2	174943	44555.5	24147.8	243172	271370	97143.2
330	sp|P02765|FETUA_HUMAN.FSVVYAK.+2	407.229	28.3	sp|P02765|FETUA_HUMAN	680899	855749	629161	918830	505760	1.72941e+06	282693	2.45426e+06	850918	781707	762490	879423	2.56715e+06	1.685e+06	189444	1.07776e+06	1.45317e+06	200011	1.34546e+06	221553	165745	1.05213e+06	781783	570507
331	sp|P02765|FETUA_HUMAN.HTFMGVVSLGSPSGEVSHPR.+4	521.011	35.31	sp|P02765|FETUA_HUMAN	1.24587e+06	1.14918e+06	780131	968744	329867	818299	22084.7	419060	137017	178268	159466	488212	572380	322122	15155.5	151705	183932	63796.2	249085	118632	56781	305864	186442	91778.8
332	sp|P02765|FETUA_HUMAN.APHGPGLIYR.+2	540.801	34.6	sp|P02765|FETUA_HUMAN	7521.41	7285.71	2382.58	3499.47	5703.41	191369	72981	3637.06	1404.57	190470	5712.5	7268.29	399266	35386.2	1145.24	43447	134161	584.271	26766.5	4151.36	12542.9	1698.03	20758.4	45751
333	sp|P02765|FETUA_HUMAN.EHAVEGDC[CAM]DFQLLK.+3	554.259	35.12	sp|P02765|FETUA_HUMAN	187199	313629	169984	340530	138833	326786	20887.5	283076	270818	76583.5	145000	155708	330781	239567	44529.1	157501	458209	69591.8	124737	65002.6	38963	286767	150229	72796.7
334	sp|P02765|FETUA_HUMAN.C[CAM]NLLAEK.+2	424.221	22.33	sp|P02765|FETUA_HUMAN	57048.5	44234.8	35260.9	31639.6	16753.8	216259	25716.2	116096	112131	136644	17652.7	74483.9	117050	90346.7	16969	84501.1	16789.1	24250.6	24968.7	9205.75	15350.1	79399.4	21068.8	14425.5
335	sp|P02765|FETUA_HUMAN.VWPQQPSGELFEIEIDTLETTC[CAM]HVLDPTPVAR.+3	1226.61	54.84	sp|P02765|FETUA_HUMAN	13353.2	3708.48	4123.28	582.486	4783.43	31192.8	16260.4	19584.5	2167.12	6231.75	985.814	707.602	9877.4	19655.1	1733.64	4914.01	0	3540.71	1456	3280.31	1693.65	15174.9	2453.31	1285.71
336	sp|P02765|FETUA_HUMAN.PETEEAALVAIDYINQNLPWGYK.+3	878.774	59.69	sp|P02765|FETUA_HUMAN	39354.9	34693	31855.5	41519.3	32944.9	77690.7	4684.99	131315	38226.5	33297.6	28412.9	62355.7	81875.8	81980.9	6488.54	35638.8	0	11157.6	48744.3	4188.42	286.351	80379.9	98676.6	11651.5
337	sp|P02765|FETUA_HUMAN.MGVVSLGSPSGEVSHPR.+3	565.954	30.42	sp|P02765|FETUA_HUMAN	410956	361096	237177	404861	179316	62118.1	21851	75261.4	41887.5	17501.9	23829.6	159175	112809	55151	3822.01	29169.9	32663.7	33451.3	25226	23160.8	9056.73	22212.1	114289	1876.5
338	sp|P02765|FETUA_HUMAN.TVVQPSVGAAAGPVVPPC[CAM]PGR.+3	672.695	36.73	sp|P02765|FETUA_HUMAN	102540	189304	89479.8	202269	66409.8	193363	4232.52	124765	72805.7	17959.4	64147	78761	186518	146161	14508.7	39072.7	259080	19152.8	74446.9	4375.78	380.437	63966.7	54484.4	3427.07
339	sp|O43505|B4GA1_HUMAN.WVNLPEESLLR.+2	678.37	47.94	sp|O43505|B4GA1_HUMAN	137726	352788	142099	212282	252706	716173	26515.1	792491	923603	13025.2	1.0761e+06	1.38949e+06	250525	1.24092e+06	291946	310959	4202.16	313444	406341	420381	145862	669595	409680	375383
340	sp|O43505|B4GA1_HUMAN.TALASGGVLDASGDYR.+2	776.884	34.8	sp|O43505|B4GA1_HUMAN	216267	375799	175348	280296	319150	574929	234117	632901	815297	191219	850657	1.49783e+06	600678	981178	197626	398186	689283	267851	521777	271589	396608	819593	323316	257174
341	sp|O43505|B4GA1_HUMAN.EPGEFALLR.+2	516.28	40.58	sp|O43505|B4GA1_HUMAN	19054.4	126060	64896.2	68234.7	70223.7	983013	607708	421384	316906	625472	821772	543998	1.35744e+06	1.30009e+06	300073	775896	1.6392e+06	103606	1.26784e+06	97756.5	624389	933372	95437.2	387675
342	sp|O43505|B4GA1_HUMAN.YEAAVPDPR.+2	509.254	24.21	sp|O43505|B4GA1_HUMAN	652635	577881	339908	500926	595709	598734	332667	813860	1.13087e+06	232504	796243	1.50239e+06	447996	913113	295753	499409	878826	399032	484089	407724	322219	537198	358793	303447
343	sp|O43505|B4GA1_HUMAN.VVPWQDPWEPFYVAGGK.+2	987.991	56.76	sp|O43505|B4GA1_HUMAN	126825	97430	74834.7	80207	110229	154985	4009.39	242414	321669	10695.8	276322	791459	41598.3	456288	41121.3	64937.2	375.292	76033.2	37091.2	124474	53835.8	151732	139406	184706
344	sp|O43505|B4GA1_HUMAN.TTMDPNDVILATHASVDNLLHLSGLLER.+4	762.147	59.28	sp|O43505|B4GA1_HUMAN	140790	86109.4	79842	72336.4	1050.73	46608.6	2795.04	68719.3	104911	21411.5	60026.4	248490	80712	161487	14329.6	34172.7	0	3506.01	42702.9	4329.88	49420.4	74251.9	25692.8	35241.1
345	sp|O43505|B4GA1_HUMAN.NELVQLYQVGEVR.+2	773.915	43.54	sp|O43505|B4GA1_HUMAN	110094	152916	70930.8	100877	134575	124272	1650.74	207691	321230	5426.7	261139	453551	44113.6	198708	31468.3	62841.6	74929.2	68365.7	72056	124943	61600.6	171707	34275.2	113777
346	sp|O43505|B4GA1_HUMAN.NELVQLYQVGEVRPF.+2	895.975	52.97	sp|O43505|B4GA1_HUMAN	220091	239031	129190	140991	186969	217187	745.553	340181	477802	7129.77	368883	604141	139597	360035	45967.5	128465	2344.38	55368.5	154034	137461	102163	279495	23622.8	132722
347	sp|O43505|B4GA1_HUMAN.PAYVVPWQDPWEPFYVAGGK.+2	1153.57	58.02	sp|O43505|B4GA1_HUMAN	61821.5	58246.1	39298.6	4141.03	20830.3	161039	338.68	189111	165586	1432.61	160822	95221.2	96764.2	193447	49873	94309	564.091	4650.16	126361	9590.5	82189.4	183158	5894.7	50461.6
348	sp|O43505|B4GA1_HUMAN.WEGPLSVSVFAATK.+2	746.396	51	sp|O43505|B4GA1_HUMAN	6926.74	23243.1	21652.3	15647.7	2473.5	102197	26963.9	68256.5	27213.6	121368	14410.4	7750.46	88404.1	33844	749.266	18769.9	34324.4	2143.87	94773	1506.37	3383.93	27583.2	16030.9	7973.77
349	sp|P69905|HBA_HUMAN.FLASVSTVLTSK.+2	626.861	37.7	sp|P69905|HBA_HUMAN	17650.6	7267.89	3855.72	2959.67	4035.57	4702.67	430.716	23785.6	15128.1	2.51216e+06	3761.1	182944	1106.03	101799	45590.9	2315.05	20220.9	5.39271e+06	13578.6	19983.7	18048.6	146046	39647	3826.84
350	sp|P69905|HBA_HUMAN.VGAHAGEYGAEALER.+3	510.583	24.26	sp|P69905|HBA_HUMAN	5856.64	2642.38	8498.37	21759.6	7392.55	12002.7	17648	26953.4	11089.3	398875	19303.1	176847	9795.87	45425	3151.1	3875.93	5017.6	8.1587e+06	13027.4	41236.3	15084.9	134875	34429.4	12872.8
351	sp|P69905|HBA_HUMAN.VADALTNAVAHVDDMPNALSALSDLHAHK.+5	600.104	62.77	sp|P69905|HBA_HUMAN	192.498	2167.6	21342.2	8359.27	22451.8	532.647	3381.37	12514.6	3753.06	379424	5445.64	32071.3	8475.48	16828	1075.83	7729.28	4299.67	371829	8903.39	338.821	6776.72	3488.46	7029.28	8618.19
352	sp|P69905|HBA_HUMAN.TYFPHFDLSHGSAQVK.+3	611.969	40.27	sp|P69905|HBA_HUMAN	8774.22	5020.54	7246.44	1641.39	21884.5	4267.82	2760.04	14188.6	3570.75	957088	3067.97	56329.6	12353.6	3616.63	1672.9	20717.2	2114.74	173515	28741.7	16505.2	34081.3	236.102	2484.72	542.38
353	sp|P69905|HBA_HUMAN.AGEYGAEALER.+2	583.278	25.51	sp|P69905|HBA_HUMAN	17352.4	2336.39	6334.29	6464.18	13958.7	22747.4	1003.07	26093.2	5028.23	197104	8873.83	11044.8	33558.9	40213.3	2792.67	7530.71	313.72	3.46176e+06	13057	11678.6	1662.17	2444.82	678.994	5272.03
354	sp|P69905|HBA_HUMAN.LLSHC[CAM]LLVTLAAHLPAEFTPAVHASLDK.+4	756.914	66.03	sp|P69905|HBA_HUMAN	373.798	941.758	5177.79	325.79	7906.59	1275.72	2693.77	735.584	3644.14	1.46753e+06	2861.26	9220.77	2706.83	52768	1531.92	2278.54	514.449	439185	3499.1	1939.71	2830.25	26420.5	3486.66	11488.4
355	sp|P69905|HBA_HUMAN.AVAHVDDMPNALSALSDLHAHK.+5	463.235	38.23	sp|P69905|HBA_HUMAN	839.487	1658.33	1068.63	1343.35	1270.35	134.458	1350.25	3834.57	627.926	12260.4	591.596	9771.86	1091.25	8478.78	214.605	1581.18	3421.15	749908	1552.49	3830.4	595.651	751.566	1068.21	1680.04
356	sp|P69905|HBA_HUMAN.TYFPHFDLSH.+3	421.865	26.03	sp|P69905|HBA_HUMAN	2156.22	9934.38	569.246	4511.5	256.228	3360.05	3783.66	530.297	950.205	6368.15	7875.41	11689.3	7274.73	1460.75	173.737	2698.72	2529.49	1.2073e+06	2777.52	4652.21	1322.8	592.661	4112.52	3654.33
357	sp|P69905|HBA_HUMAN.VADALTNAVAHVDDMPNAL.+2	968.975	44.58	sp|P69905|HBA_HUMAN	26984.1	16229.7	18730.3	20435.4	20079	4639.79	2456.91	5270.79	5217.03	11870.7	1173.39	19068.4	6201.56	12784.5	4088.6	2258.05	4291.68	174406	3543.47	2331.34	1484.42	13613.6	13841.2	368.838
358	sp|P69905|HBA_HUMAN.VADALTNAVAH.+2	541.285	34.63	sp|P69905|HBA_HUMAN	4753.93	7153.21	2871.12	22916	6414.75	4053.44	3839.76	10534.6	30027.7	899.422	8601.32	16451.1	27911	53068.1	13975.5	3037.64	1127.07	1.0296e+06	15638.2	24165.2	16301.7	6752.09	25014.2	11362.9
359	sp|P06727|APOA4_HUMAN.LAPLAEDVR.+2	492.28	29.56	sp|P06727|APOA4_HUMAN	437952	544639	394539	1.25669e+06	233461	1.47944e+06	255780	1.73312e+06	822136	506078	519354	1.87268e+06	1.64973e+06	1.07116e+06	345848	966116	14975.6	280513	1.19584e+06	657255	587532	1.27811e+06	731610	478228
360	sp|P06727|APOA4_HUMAN.SLAELGGHLDQQVEEFR.+3	643.322	42.75	sp|P06727|APOA4_HUMAN	216695	370211	208770	613106	127273	631468	37085.7	736412	419758	55758.6	275610	892705	642135	474393	154606	383651	448894	95323.6	595691	267913	235771	602346	376143	244642
361	sp|P06727|APOA4_HUMAN.LEPYADQLR.+2	552.788	28.83	sp|P06727|APOA4_HUMAN	162116	409951	217933	811927	136597	1.14734e+06	143171	1.38947e+06	673194	421577	405582	1.10008e+06	1.45563e+06	709008	277783	744587	708839	155453	991779	336284	419205	1.01232e+06	444869	369988
362	sp|P06727|APOA4_HUMAN.ALVQQMEQLR.+2	608.329	36.05	sp|P06727|APOA4_HUMAN	98125.1	200524	130717	482953	61353.3	354688	6116.8	250578	203442	133855	232564	620176	351018	261316	29683.1	100403	270556	67587.1	255977	153335	177074	278081	223642	133911
363	sp|P06727|APOA4_HUMAN.ISASAEELR.+2	488.259	22.48	sp|P06727|APOA4_HUMAN	240836	287242	219549	668946	127028	278924	88998.3	623518	300689	216468	238104	630750	737450	317068	143500	450551	455209	85195.4	482227	182500	181861	448089	349265	237263
364	sp|P06727|APOA4_HUMAN.LLPHANEVSQK.+3	412.563	18.82	sp|P06727|APOA4_HUMAN	239124	194682	140983	497273	70807.5	270346	20820	321074	175350	122424	89464.1	167128	127018	122165	61467.4	189640	167587	9458.68	179102	6206.55	3602.89	142339	82254.3	61283
365	sp|P06727|APOA4_HUMAN.IDQNVEELK.+2	544.285	24.24	sp|P06727|APOA4_HUMAN	257464	218937	160969	521947	94385.3	347921	52785.6	503900	273492	91747.3	108977	397121	313344	202083	78113.5	241943	217223	45073.6	232715	123825	67689.1	234252	179582	121344
366	sp|P06727|APOA4_HUMAN.SLAPYAQDTQEK.+2	675.83	23.18	sp|P06727|APOA4_HUMAN	170675	123031	96937	270110	44844.3	155364	29797.2	293502	157659	52851.7	67972.1	188912	217746	97409.5	43040.9	130281	126097	11060.5	133047	36809.1	55961.2	137934	65595.1	55517.6
367	sp|P06727|APOA4_HUMAN.ENADSLQASLRPHADELK.+4	499.254	29.8	sp|P06727|APOA4_HUMAN	51726.3	47533.6	39075.4	80700.7	17800.5	138571	6710.82	174211	53674.5	49766.5	277.455	3856.01	186919	3161.99	18055.2	70659.1	101157	740.063	135510	12106.7	37005.2	113686	23965.3	29092.4
368	sp|P06727|APOA4_HUMAN.LNHQLEGLTFQMK.+3	520.273	37.68	sp|P06727|APOA4_HUMAN	82201.5	89710.6	57904	157917	19409.6	125342	86356.8	67544.6	39407.7	35333.4	46079	109141	85795.2	48204.9	9953.04	20396.4	59792.3	22761.6	63229.5	22117.5	47932.2	42691	28776.2	22726.9
369	sp|P19827|ITIH1_HUMAN.GSLVQASEANLQAAQDFVR.+3	668.676	44.24	sp|P19827|ITIH1_HUMAN	6827.5	83496	12795.4	1103.81	1790.82	173890	5820.72	232767	82130.2	117657	512.896	80438.2	230293	188402	29701	148537	412.105	7035.63	125537	60629.7	59879.6	223969	98298.9	89551.3
370	sp|P19827|ITIH1_HUMAN.EVAFDLEIPK.+2	580.813	46.17	sp|P19827|ITIH1_HUMAN	73083.2	101043	33249.3	161287	29756.6	273817	27354.5	386462	127108	147127	60684.7	175724	377518	330288	52009.5	255196	3691.81	65029.4	221490	121137	102366	389695	186390	143875
371	sp|P19827|ITIH1_HUMAN.LDAQASFLPK.+2	545.301	29.63	sp|P19827|ITIH1_HUMAN	12981.8	1290.93	3428.35	1110.97	5319.85	404091	5722.81	542357	4738.63	147349	995.353	1757.67	418776	124365	34622.7	273670	209647	23207.3	177292	566.194	62823.7	404865	107309	109254
372	sp|P19827|ITIH1_HUMAN.AAISGENAGLVR.+2	579.317	36.03	sp|P19827|ITIH1_HUMAN	49893.1	9447.26	53321.1	101929	75429.9	473865	83934.7	632010	120843	150113	8570.72	13929.8	506861	1936.41	122723	439746	299525	86186.7	317394	137942	181493	430155	253050	259183
373	sp|P19827|ITIH1_HUMAN.FAHYVVTSQVVNTANEAR.+3	669.341	32.56	sp|P19827|ITIH1_HUMAN	42174.7	92171.6	27602	114410	21759	394454	32811.3	493861	121559	198103	59345.3	117940	492280	237928	39011.1	277508	197219	9449.94	218661	54851.5	81674.7	455042	51672.5	96778.1
374	sp|P19827|ITIH1_HUMAN.IYEDHDATQQLQGFYSQVAK.+3	781.041	42.21	sp|P19827|ITIH1_HUMAN	30502.5	66536.9	21334	84523.9	17899.6	245053	9856.51	318312	89107	39155.9	62320.9	109009	341903	227658	32835	208711	146295	7584.79	195340	63659.5	69637	301387	83042.2	94890.3
375	sp|P19827|ITIH1_HUMAN.PLLVDVDLQYPQDAVLALTQNHHK.+4	682.617	55.9	sp|P19827|ITIH1_HUMAN	50247.9	68837.7	28519.2	100910	24004	377468	11234.6	506627	51894	81332.7	20585.7	186165	116293	390900	23972.2	154228	1284.01	25137.9	183304	29940.6	71224.9	346365	147981	188379
376	sp|P19827|ITIH1_HUMAN.IC[CAM]DLLVANNHFAH.+3	508.586	36.37	sp|P19827|ITIH1_HUMAN	9948.17	2854.73	1871.03	22348.3	2247.56	29111.3	11574.3	39547.7	40564.3	3587.45	3866.37	40276.1	6930.32	29031.9	5005.25	2635.25	13989.1	10240.1	404.778	7401.75	2625.92	1148.68	2177.39	3433.19
377	sp|P19827|ITIH1_HUMAN.GMADQDGLKPTIDKPSEDSPPLEMLGPR.+4	749.369	42	sp|P19827|ITIH1_HUMAN	30188.6	3752.83	7425.73	45583.9	327.718	21752.6	2004.86	5049.23	12910.6	2782.52	8895.66	808.383	6253.09	3788.94	2341.76	4031.81	4122.16	1087.56	1361.95	7528.87	3097.1	25630.7	335.361	729.54
378	sp|P19827|ITIH1_HUMAN.NHMQYEIVIK.+2	637.832	30.68	sp|P19827|ITIH1_HUMAN	23595	26796.1	3907.44	43897.2	12395.5	6871.08	3265.8	6455.45	5799.96	13760.6	3312.55	21636.6	12593.5	20459.4	22334.4	4307.85	2583.15	1657.96	5498.22	4038.6	12328.4	24902.8	9150.5	862.379
379	sp|O15240|VGF_HUMAN.LHLPADDVVSIIEEVEE.+2	953.986	58.97	sp|O15240|VGF_HUMAN	284003	282872	159135	222878	372002	290797	221878	333887	397579	60157.3	261425	1.17067e+06	257037	405638	121741	296104	0	271609	286329	195592	57979.2	340455	456363	247671
380	sp|O15240|VGF_HUMAN.ALAAVLLQALDR.+2	627.382	56.89	sp|O15240|VGF_HUMAN	468560	387967	222250	347853	625542	274042	15856.2	372034	134969	42307.4	127242	615324	39566.5	185317	28709.3	223770	466.744	91420.4	134861	334687	33307.1	173364	52902.7	69576.3
381	sp|O15240|VGF_HUMAN.APPGRPEAQPPPLSSEHKEPVAGDAVPGPK.+5	603.317	26.65	sp|O15240|VGF_HUMAN	315876	273330	148427	153740	264937	176174	73667.9	115679	27521.6	40367.9	43258.6	135111	42751.4	32065.5	18354.5	156380	427631	9359.23	128262	21068.7	4597.69	46647.1	3870.01	34243.8
382	sp|O15240|VGF_HUMAN.VGEEDEEAAEAEAEAEEAER.+2	1081.95	35.5	sp|O15240|VGF_HUMAN	297136	264799	181732	277210	469747	157461	132268	221658	123142	1946.22	62291.8	770642	26555.1	153839	1777.89	60573	291211	133110	62794.2	247879	10772.1	88442.3	75785.3	109247
383	sp|O15240|VGF_HUMAN.LHLPADDVVSIIEE.+2	775.409	51.52	sp|O15240|VGF_HUMAN	18589.2	2692.9	5598.19	3925.56	33911.2	2569.89	1108.09	9522.06	17072	3220.29	35813	45407.2	24301.8	64541.2	6460.42	4270.69	1708.39	46555.8	8151.21	30072.2	16796.4	35636.5	32975.8	20441.5
384	sp|O15240|VGF_HUMAN.GLQEAAEER.+2	501.746	17.27	sp|O15240|VGF_HUMAN	402709	311581	203799	294623	491956	75900.8	158678	215493	93820.2	67009	128374	282168	27840.2	126060	26101.2	171474	335142	152882	145043	107024	23632.8	82809.8	87406.1	122114
385	sp|O15240|VGF_HUMAN.NSEPQDEGELFQGVDPR.+2	958.935	38.16	sp|O15240|VGF_HUMAN	30259.8	27898.7	16444	29594	43096.4	39744.3	12447.6	52281.6	31856	5045.81	22171.3	48621.7	8752.19	18423.7	8125.12	18993.6	50428.9	12985.4	23054.9	19699.4	7784.32	16408.9	544.489	254.795
386	sp|O15240|VGF_HUMAN.APPGRPEAQPPPLSSEHK.+4	474.5	20.12	sp|O15240|VGF_HUMAN	301810	234476	129162	240284	597223	70771	31216.8	72772.3	33714.9	4195.92	39640.1	181523	17732.2	34701.9	9629.69	80533.8	131677	32589.4	25425.2	155162	4385.39	18520.3	18175.8	67523.7
387	sp|O15240|VGF_HUMAN.GRPEAQPPPLSSEHKEPVAGDAVPGPK.+5	550.288	25.33	sp|O15240|VGF_HUMAN	275889	246366	174109	202828	192405	107526	92591.2	175380	52189.8	25117.9	15664.1	221645	46972.5	76473.5	39433.3	95876	347689	75039.4	143992	267206	4608.93	91246.5	53084.8	24842.3
388	sp|O15240|VGF_HUMAN.AYQGVAAPFPK.+2	574.809	32.17	sp|O15240|VGF_HUMAN	74031.2	51414.8	43485.3	51084.8	92639.3	40790.6	18341.9	26388.8	39964.8	23302.3	16990.3	38150.4	9311.96	51761.5	14459.4	11433.8	82585.7	25718.5	34377	40536.6	4065.53	70959.3	8003.05	5977.44
389	sp|P10645|CMGA_HUMAN.YPGPQAEGDSEGLSQGLVDR.+2	1037.99	36.05	sp|P10645|CMGA_HUMAN	266572	255828	170052	259024	311374	287949	83429.6	245463	98529.3	21856.4	123662	809247	139507	277358	23846.9	121926	316837	34829	139737	75312.5	58752.6	211377	78787.5	133090
390	sp|P10645|CMGA_HUMAN.RPEDQELESLSAIEAELEK.+3	729.366	51.65	sp|P10645|CMGA_HUMAN	912706	916660	637752	799920	1.22835e+06	880105	474313	751382	889496	149391	727754	3.05335e+06	530613	1.22378e+06	221740	751703	477.164	620044	877201	908551	280531	771303	892281	603143
391	sp|P10645|CMGA_HUMAN.HSGFEDELSEVLENQSSQAELK.+3	826.054	49.17	sp|P10645|CMGA_HUMAN	668271	698814	494598	480357	764838	561934	108291	407693	260360	93555.5	279953	1.12174e+06	174252	317916	51620.6	340147	418.739	108547	185122	381496	109051	373436	149392	268051
392	sp|P10645|CMGA_HUMAN.SEALAVDGAGKPGAEEAQDPEGK.+3	742.689	24.9	sp|P10645|CMGA_HUMAN	771514	743639	517739	709938	834948	636309	482357	645126	522597	40088.6	438390	2.10391e+06	406443	942424	169434	465657	1.19828e+06	226202	478899	257957	134005	387171	428630	504966
393	sp|P10645|CMGA_HUMAN.PQALPEPMQESK.+2	677.837	27.86	sp|P10645|CMGA_HUMAN	1.05366e+06	927002	705467	1.05694e+06	807749	249264	12234	149611	114552	6091.06	167985	1.01584e+06	30227.8	174674	4106.97	40787.2	271413	95595.8	56492.3	84804.6	47836.9	78276.6	121058	93544.8
394	sp|P10645|CMGA_HUMAN.SGELEQEEER.+2	603.268	15.82	sp|P10645|CMGA_HUMAN	702423	584588	410839	633718	876947	135552	106674	105629	87926.9	28218.8	50381.5	666734	14844	181711	36382.2	146730	268712	151131	103596	130960	11298.7	52068.4	26832.2	109209
395	sp|P10645|CMGA_HUMAN.AEGNNQAPGEEEEEEEEATNTHPPASLPSQK.+3	1107.15	29.38	sp|P10645|CMGA_HUMAN	108492	99203	67488.1	85262.9	131925	98632.7	53765.8	103913	25516.6	1904.97	27206.9	241115	38547.4	81454.2	6967.24	48911.4	642.186	15850	31756.5	26607.2	5200.93	55399.1	25011.2	38010
396	sp|P10645|CMGA_HUMAN.SEALAVDGAGK.+2	509.264	20.3	sp|P10645|CMGA_HUMAN	311586	240260	211886	331941	678836	89474.2	45884.7	124148	142877	2684.52	113896	657324	39300.4	226659	38816.7	112925	155629	272351	97025	240608	25740.9	105539	324145	225479
397	sp|P10645|CMGA_HUMAN.GLSAEPGWQAK.+2	572.293	27.4	sp|P10645|CMGA_HUMAN	208145	205450	131764	202036	278351	224536	131265	193914	203024	24527	154743	804243	131140	277318	49733.3	128785	397175	112272	179481	117561	51126.9	173760	204055	164208
398	sp|P10645|CMGA_HUMAN.VAHQLQALR.+2	518.307	19.02	sp|P10645|CMGA_HUMAN	6346.41	25205.8	10631.9	24429.9	23767	54717.4	25170.7	38489.9	2303.06	1292.1	25655.3	12492.3	39178.9	26983.8	11191.4	10708.9	135866	16410.5	47253.2	7815.52	2228.37	32191.6	17988.8	20258
399	sp|P13591|NCAM1_HUMAN.LQVDIVPSQGEISVGESK.+2	942.999	43.05	sp|P13591|NCAM1_HUMAN	236104	1932.21	1020.03	187581	8347.84	4807.97	718.368	16441	10586.1	161609	150.102	549727	437239	2801.12	3327.79	5525.23	4868.85	6505.95	16216	91300.6	4525.2	397667	47728.1	8730.61
400	sp|P13591|NCAM1_HUMAN.YIFSDDSSQLTIK.+2	758.88	41.58	sp|P13591|NCAM1_HUMAN	313278	264529	153917	256192	304315	104506	51228.7	185007	256580	2725.11	383598	944038	130719	417701	94217.7	90248.8	181140	180891	197752	257856	199929	192199	335899	284816
401	sp|P13591|NCAM1_HUMAN.FIVLSNNYLQIR.+2	740.42	49.68	sp|P13591|NCAM1_HUMAN	132755	198171	139470	178826	176109	557231	47097.1	532068	245739	220625	506930	983626	702276	923287	187243	246530	5620.6	89895.6	531261	151553	489395	501913	187171	454438
402	sp|P13591|NCAM1_HUMAN.DKDISWFSPNGEK.+3	508.244	35.22	sp|P13591|NCAM1_HUMAN	158876	108063	98321.9	92127	91728.3	194440	253572	168021	160777	139783	163974	341362	271180	312688	41726.4	128583	319197	60465.2	321971	85506	140163	214203	83470	82327.8
403	sp|P13591|NCAM1_HUMAN.DGEQIEQEEDDEKYIFSDDSSQLTIK.+3	1021.13	44.86	sp|P13591|NCAM1_HUMAN	23979.1	24285.4	34075.2	28039.5	13970.9	43174.6	22121	40832.5	59293.2	13133.4	29972.7	90735.1	38306.7	49759.9	6680.03	15086.2	50489.9	1880.57	30892.9	6997.67	19961.3	41116.9	8096.21	4176.47
404	sp|P13591|NCAM1_HUMAN.DGEQIEQEEDDEK.+2	782.318	18.56	sp|P13591|NCAM1_HUMAN	37741.9	31177	39482.6	87878.3	98220.7	34197.3	9494.71	67058.4	38352	2329.66	20512.1	103131	4878.94	18250.8	8051.78	9734.4	16278.2	45879.5	7182.24	37275	3117	6690.5	44256.3	26012.6
405	sp|P13591|NCAM1_HUMAN.AGEQDATIHLK.+2	591.809	20.58	sp|P13591|NCAM1_HUMAN	51515.2	48435.8	43270.7	55219.2	55793.9	65752.1	16020.3	30599.1	40936.3	6002.85	29879.5	129724	42199.4	27781.8	6249.29	6715.42	49673.8	24101.2	5863.96	35079.9	4219.08	10571.5	40140.5	24907.2
406	sp|P13591|NCAM1_HUMAN.C[CAM]VVTGEDGSESEATVNVK.+2	940.931	26.9	sp|P13591|NCAM1_HUMAN	8441.35	6863.3	5055.05	9547.8	5730.84	10153.1	1118.95	1776.43	12442.2	1030.55	16674.4	10346	10393	13245.5	6062.44	423.275	12607.6	1753.69	9182.06	5832.38	15168.2	3442.94	2449.8	2853.86
407	sp|P13591|NCAM1_HUMAN.DIQVIVNVPPTIQAR.+2	831.981	46.65	sp|P13591|NCAM1_HUMAN	25600.7	8300.77	40289.2	5805.49	48247.1	2455.88	3149.09	155550	208379	12054.9	221837	354665	169292	214803	59695.6	71164.5	13506.8	73802.6	134543	79078.9	244210	167074	75988.3	131775
408	sp|P13591|NCAM1_HUMAN.NDEAEYIC[CAM]IAENK.+2	784.848	35.07	sp|P13591|NCAM1_HUMAN	23767.8	19510.7	19471.6	30702.7	10125.2	4549.66	10750.7	2101.16	1469.6	8241.19	10360.2	16904.2	21383.3	30750.2	12595	10659.9	31237	4292.13	6547.66	2439.74	488.302	21754.9	10390.2	1632.47
409	sp|P09871|C1S_HUMAN.LLEVPEGR.+2	456.761	28.5	sp|P09871|C1S_HUMAN	701130	652445	881934	385768	637414	806744	502565	1.19359e+06	840586	465456	940002	1.71851e+06	915319	1.44695e+06	387210	670237	909836	426895	980854	607536	1.21645e+06	1.14219e+06	399913	394700
410	sp|P09871|C1S_HUMAN.IIGGSDADIK.+2	494.769	34.72	sp|P09871|C1S_HUMAN	12339.9	942.548	413003	4780	17936.4	9414.24	102217	356057	9994.59	125722	395699	514954	300808	462621	27556.1	253133	256037	32686.2	235648	147088	382792	408092	37416.7	172502
411	sp|P09871|C1S_HUMAN.VEKPTADAEAYVFTPN.+2	876.428	37.76	sp|P09871|C1S_HUMAN	86371	63488.9	92287.2	32872.6	55142.3	79930.2	13778.5	97433.8	81659.5	3630.66	101598	177792	70427.6	152700	21971.6	51579.1	75662.3	29497.5	76378.2	51957.3	144419	147199	39664.8	34530.9
412	sp|P09871|C1S_HUMAN.TNFDNDIALVR.+2	639.328	38.68	sp|P09871|C1S_HUMAN	16890.6	79861.9	85202.4	39684	56384.2	230348	146007	271611	185221	188262	339052	631514	368055	594457	101281	208379	382510	141916	464144	127704	462580	413164	121890	185389
413	sp|P09871|C1S_HUMAN.EDTPNSVWEPAK.+2	686.823	29.76	sp|P09871|C1S_HUMAN	106012	84615.8	115916	43285.6	81440.9	103580	62582.3	135428	123358	36486.3	136248	261126	128324	184642	38850.4	79824.8	100165	37110.8	120132	57738.5	171530	194006	54117.7	51330.5
414	sp|P09871|C1S_HUMAN.MLTPEHVFIHPGWK.+4	423.724	38.26	sp|P09871|C1S_HUMAN	81227	60329.2	100276	38671.3	30545.9	53608.5	4218.67	42845.8	30468.1	23178.9	49639.2	182305	47128.2	105209	6896.3	23008.2	97045.5	8734.96	67180.4	22470	59610.7	73795.3	21153.9	19037.2
415	sp|P09871|C1S_HUMAN.SNALDIIFQTDLTGQK.+2	882.462	55.71	sp|P09871|C1S_HUMAN	142892	115739	152430	52540.2	93207.8	119500	47422.7	169189	161798	83839.1	138024	364613	169314	257481	38740.7	86157.2	630.877	57220.4	157498	79124.6	219853	238706	104462	94986.2
416	sp|P09871|C1S_HUMAN.VEDPESTLFGSVIR.+2	774.899	49.31	sp|P09871|C1S_HUMAN	46183.4	44361.8	58368.8	20918.5	58908.9	87715.8	79436.4	77635.8	87528	37916.1	134224	152781	101190	184172	35249.2	60596.9	5317.12	72847.9	182318	75578.2	185783	179837	75546.3	58905.7
417	sp|P09871|C1S_HUMAN.GDSGGAFAVQDPNDK.+2	739.331	24.99	sp|P09871|C1S_HUMAN	99530.5	80592.3	111679	48267.3	72044.6	100248	55096.8	133267	104325	30589.9	94058.5	160481	79005.6	130250	27956.6	62159.5	82599.8	24237	60983.8	29223.7	95424.5	98129.1	32050.8	32726
418	sp|P09871|C1S_HUMAN.SSNNPHSPIVEEFQVPY.+2	972.46	46.04	sp|P09871|C1S_HUMAN	57169.6	46781.6	71598.8	56974.4	36124.1	39659	4207.85	64403.2	64478.9	7229	95773	130419	29128.4	113971	22294.3	50637.8	83791.1	17320.5	17780.3	49786.3	93185.3	100403	20394.9	61619.5
419	Biognosys|iRT-Kit_WR_fusion.LFLQFGAQGSPFLK.+2	776.93	54.78	Biognosys|iRT-Kit_WR_fusion	6.10172e+06	7.58051e+06	8.2255e+06	7.60567e+06	7.64828e+06	4.7494e+06	3.6713e+06	4.33721e+06	2.1957e+06	2.23319e+06	1.87478e+06	394488	1.21849e+06	826976	227841	232819	711.812	3.63822e+06	3.46938e+06	3.17706e+06	229912	304581	772726	839823
420	Biognosys|iRT-Kit_WR_fusion.DGLDAASYYAPVR.+2	699.338	38.28	Biognosys|iRT-Kit_WR_fusion	1.36358e+06	549967	1.54961e+06	1.57629e+06	687454	4.98901e+06	3.64589e+06	4.19666e+06	2.70888e+06	3.43417e+06	2.99869e+06	4.49724e+06	3.38224e+06	2.65902e+06	1.87362e+06	2.08758e+06	161364	3.21032e+06	3.46541e+06	2.70789e+06	4.87861e+06	4.70725e+06	2.89476e+06	2.82697e+06
421	Biognosys|iRT-Kit_WR_fusion.VEATFGVDESNAK.+2	683.828	27.22	Biognosys|iRT-Kit_WR_fusion	889410	870693	1.00312e+06	956571	1.10759e+06	954590	894184	846690	563675	523885	491318	564064	596119	383747	407054	329150	32401.6	552407	601747	460609	678615	713545	583690	489690
422	Biognosys|iRT-Kit_WR_fusion.ADVTPADFSEWSK.+2	726.836	40.76	Biognosys|iRT-Kit_WR_fusion	1.21082e+06	1.43844e+06	1.50944e+06	1.52386e+06	1.579e+06	1.52483e+06	1.28934e+06	1.26086e+06	925758	1.08036e+06	1.1218e+06	1.36528e+06	1.40304e+06	962877	908055	735709	71727	1.16156e+06	1.38993e+06	1.13829e+06	1.77346e+06	1.72785e+06	1.1903e+06	1.2381e+06
423	Biognosys|iRT-Kit_WR_fusion.TPVISGGPYEYR.+2	669.838	32.36	Biognosys|iRT-Kit_WR_fusion	862529	886135	927329	967179	1.07703e+06	2.28402e+06	2.06531e+06	2.02307e+06	1.36087e+06	1.78616e+06	1.31491e+06	2.00586e+06	1.93095e+06	1.25575e+06	1.33068e+06	951570	51515.6	1.39077e+06	1.57363e+06	1.27776e+06	3.06897e+06	2.62898e+06	1.734e+06	1.89786e+06
424	Biognosys|iRT-Kit_WR_fusion.LGGNEQVTR.+2	487.257	14.15	Biognosys|iRT-Kit_WR_fusion	378831	331317	370962	397875	459779	559037	520774	484334	566296	468334	516343	532018	304919	367229	597445	296876	26685.6	489273	526279	364217	465914	530805	569361	680351
425	Biognosys|iRT-Kit_WR_fusion.YILAGVENSK.+2	547.298	29.85	Biognosys|iRT-Kit_WR_fusion	1.02368e+06	971903	1.02639e+06	1.1452e+06	1.17112e+06	2.09412e+06	1.54756e+06	2.0116e+06	1.27231e+06	1.66003e+06	1.24582e+06	1.71979e+06	1.70401e+06	985216	1.24525e+06	906134	37247.4	1.41834e+06	1.39839e+06	1.16207e+06	2.5395e+06	2.27585e+06	1.56474e+06	1.59553e+06
426	Biognosys|iRT-Kit_WR_fusion.GAGSSEPVTGLDAK.+2	644.823	23.26	Biognosys|iRT-Kit_WR_fusion	330230	271057	328065	345896	379702	962613	1.01483e+06	840090	635445	795579	464542	534676	507311	357593	568322	412479	7886.29	551412	520896	417252	738048	692249	610242	672205
427	Biognosys|iRT-Kit_WR_fusion.GTFIIDPGGVIR.+2	622.854	46.71	Biognosys|iRT-Kit_WR_fusion	3.01828e+06	2.89166e+06	3.05817e+06	2.90373e+06	3.43757e+06	2.11688e+06	1.7286e+06	1.77652e+06	1.16839e+06	1.54866e+06	1.47244e+06	1.53941e+06	1.66746e+06	1.14538e+06	1.02172e+06	806661	91145	1.68979e+06	1.75635e+06	1.5289e+06	2.05158e+06	2.05261e+06	1.47555e+06	1.62582e+06
428	Biognosys|iRT-Kit_WR_fusion.GTFIIDPAAVIR.+3	424.915	51.7	Biognosys|iRT-Kit_WR_fusion	78727.9	79643.7	78553.7	77778.1	89314.8	121738	105743	88686.6	44082.3	82810.5	79039.8	39630.7	75278.1	64345.8	36650.3	37730.5	9830.65	117190	115821	114195	96194.5	82122.1	91129.4	79225
429	sp|P43652|AFAM_HUMAN.IAPQLSTEELVSLGEK.+2	857.467	45.92	sp|P43652|AFAM_HUMAN	196100	139416	156490	213847	71974.3	209803	36578.5	370036	200929	134494	101230	237869	349331	436657	45905.5	159050	6246.25	47576.8	307930	203930	131833	389231	360582	174002
430	sp|P43652|AFAM_HUMAN.LPNNVLQEK.+2	527.798	26.86	sp|P43652|AFAM_HUMAN	71844.8	41768.4	78718.4	75387.9	3614.67	132242	28408.1	109090	28848.4	69134.2	25767.1	55258.4	160529	139018	31502.9	83197.5	105355	15867.5	115314	43653.5	48823.2	111354	118910	73500.5
431	sp|P43652|AFAM_HUMAN.ESLLNHFLYEVAR.+3	530.947	53.06	sp|P43652|AFAM_HUMAN	26120.2	74154.2	61199.6	80773.4	28435.7	295078	12388.7	493046	160899	291746	113029	198238	590690	622132	72485.2	252623	2059.42	38101.8	567171	100906	173926	511642	154756	275337
432	sp|P43652|AFAM_HUMAN.SDVGFLPPFPTLDPEEK.+2	944.472	56.73	sp|P43652|AFAM_HUMAN	137603	111526	139823	169217	67352.6	170693	11337.3	371171	183117	79397.4	99650.5	211481	215471	370732	41322.7	126681	468.823	76652.6	250880	193815	107947	281118	416685	199009
433	sp|P43652|AFAM_HUMAN.HVC[CAM]GALLK.+2	449.252	17.61	sp|P43652|AFAM_HUMAN	26535.5	26425.3	24117.3	54135.3	14305.3	45513.3	5512.25	85138.4	37949	14543.9	12599.7	31803.8	21471.4	56860.4	14014	32945.7	32527.8	16275.2	10673	14073.7	33548.8	57548.2	19306.7	28520.4
434	sp|P43652|AFAM_HUMAN.AQYVQEATFEEMEK.+2	851.885	36.82	sp|P43652|AFAM_HUMAN	140587	85655.4	96914.9	147300	33217.9	52509.7	5169.77	43588.4	53109.8	23997.8	36604.6	67901.6	812.318	96998.1	37268.2	4784.46	7058.47	10528.9	8030.65	17433.9	24572.3	66488.7	88027.6	18876.8
435	sp|P43652|AFAM_HUMAN.IC[CAM]AMEGLPQK.+2	573.786	28.88	sp|P43652|AFAM_HUMAN	76182.9	53257.4	64756.6	111208	9311.42	70891.8	1115.64	70398.5	53182.3	24827.5	24373.3	67886.9	25366	50932.8	3227.8	21442.8	64899.2	3701.66	46917.4	13807.8	38693.8	88678	30451.4	27382.5
436	sp|P43652|AFAM_HUMAN.HPDLSIPELLR.+2	645.364	43.94	sp|P43652|AFAM_HUMAN	3811.88	624.227	7776.27	14266.1	3462.27	28578.6	68.7524	44393.6	15317.4	2584.72	10569.9	15861.3	18783.4	101780	288.739	18728.6	3345.9	820.171	37758.6	284.947	9047.85	44511.4	80080	41586.8
437	sp|P43652|AFAM_HUMAN.RHPDLSIPELLR.+3	482.612	39.73	sp|P43652|AFAM_HUMAN	53796.9	212509	115568	254190	80859.3	132222	15980.3	320247	107454	62529.6	123905	126353	778079	348232	161659	486037	382016	13015	823548	8714.89	410069	814025	339937	257244
438	sp|Q92876|KLK6_HUMAN.LSELIQPLPLER.+2	704.414	46.95	sp|Q92876|KLK6_HUMAN	1.51062e+06	1.11305e+06	1.07759e+06	1.35775e+06	1.11339e+06	1.22756e+06	1.00288e+06	1.43517e+06	1.79298e+06	536158	1.92703e+06	3.30716e+06	2.05846e+06	2.64836e+06	527989	1.02653e+06	1173.37	685632	1.67586e+06	1.35912e+06	2.50548e+06	2.33571e+06	1.17136e+06	1.28181e+06
439	sp|Q92876|KLK6_HUMAN.GLVSWGNIPC[CAM]GSK.+2	687.845	40.13	sp|Q92876|KLK6_HUMAN	785338	596519	615074	786049	626938	855016	443782	943679	951091	377348	1.00675e+06	2.13804e+06	1.16552e+06	1.56068e+06	208031	550150	1.1046e+06	391278	879137	691862	1.27452e+06	1.46688e+06	254215	697484
440	sp|Q92876|KLK6_HUMAN.AVIHPDYDAASHDQDIMLLR.+4	570.782	39.24	sp|Q92876|KLK6_HUMAN	17698.9	109469	54201.6	103826	40510.5	195537	25583.7	124986	177028	62657.5	503346	456999	244403	391323	22762.4	91862.7	395157	73260.6	229188	63012.9	454378	284162	162336	170263
441	sp|Q92876|KLK6_HUMAN.YTNWIQK.+2	476.748	26.98	sp|Q92876|KLK6_HUMAN	382517	302578	331219	396664	345588	464103	239896	540675	479851	216135	363485	690071	470825	426221	131104	311905	560954	185725	413650	335166	427000	606658	290640	351207
442	sp|Q92876|KLK6_HUMAN.KPNLQVFLGK.+2	572.348	34.3	sp|Q92876|KLK6_HUMAN	31941.8	47714.2	47409.5	54515.6	42471.8	62775.3	105179	71939.8	112628	47948.1	119643	157083	202134	271566	23143	75029.9	192942	7693.15	127707	31773.6	230178	195833	20725.4	72026.9
443	sp|Q92876|KLK6_HUMAN.DSC[CAM]QGDSGGPLVC[CAM]GDHLR.+3	643.944	27.55	sp|Q92876|KLK6_HUMAN	25117.3	79699.1	49043.2	107934	55792.8	462017	112404	270886	423883	136336	246368	258347	127071	180996	57085.6	322177	746926	91097.3	132167	62963.6	366825	423520	19725.8	81473.7
444	sp|Q92876|KLK6_HUMAN.ESSQEQSSVVR.+2	618.297	12.89	sp|Q92876|KLK6_HUMAN	121805	168177	136954	207316	161961	28752.4	54959.4	58233	145452	58004	118109	133715	50323.2	109863	49352.7	49688	113194	45343.1	57896.5	37749.5	120605	87832	113275	96953.6
445	sp|Q92876|KLK6_HUMAN.TADGDFPDTIQC[CAM]AY.+2	787.327	42.83	sp|Q92876|KLK6_HUMAN	35113.5	32215.5	26919.9	43857.6	30037.1	61557.2	4954.49	68651	90055.5	6893.01	51297.5	146968	6729.28	85006.3	11542.9	30564.1	46787.9	686.029	1814.25	52230.2	71376	79784.4	17236	11946.3
446	sp|Q92876|KLK6_HUMAN.TADGDFPDTIQC[CAM]AYIHLVSR.+3	760.364	40.17	sp|Q92876|KLK6_HUMAN	1409.05	4205.62	11683.2	4755.76	2035.24	258723	137915	108655	69035.6	123896	56497.3	3101.68	342458	98255.5	30936.5	205391	1147.18	1973.21	301875	1095.8	261052	293843	35293.5	26098.8
447	sp|Q92876|KLK6_HUMAN.EEC[CAM]EHAYPGQITQN.+2	838.355	23.56	sp|Q92876|KLK6_HUMAN	34430.4	26366.3	20288.2	44788.7	29253	222957	3596.07	179799	220690	1247.78	58871.9	103089	10221.9	61151.2	12093.3	90641.7	121264	21236.7	10723.5	23283.8	83499.1	115944	8050.78	25952.8
448	tr|Q5T985|Q5T985_HUMAN.IQPSGGTNINEALLR.+2	791.931	31.94	tr|Q5T985|Q5T985_HUMAN	1814.01	26018.1	7811.94	29397.3	3430.08	357528	23120.3	397844	100725	141306	62098	154481	394386	339448	41754.5	218603	177687	36825.8	234872	42072.9	83658.4	497541	98319.5	83139
449	tr|Q5T985|Q5T985_HUMAN.FLHVPDTFEGHFDGVPVISK.+4	561.039	47.01	tr|Q5T985|Q5T985_HUMAN	31639.7	39169.6	17805.8	42386.2	12920.9	158864	1041.59	179989	62165.7	93758.3	36115.2	119051	195936	203805	26209.8	117248	9603.34	7166.56	147303	37908.9	45566.1	229618	88185.1	57550.9
450	tr|Q5T985|Q5T985_HUMAN.TEVNVLPGAK.+2	514.293	27.88	tr|Q5T985|Q5T985_HUMAN	51880.8	54790	31243.4	72501.3	20274.4	238296	22678.5	264520	98520.1	44444.9	49729.8	122329	181048	183854	28747.4	155452	108713	26262.8	103461	55886.3	46980.4	277210	90161.6	51593.7
451	tr|Q5T985|Q5T985_HUMAN.VQFELHYQEVK.+3	473.914	33.36	tr|Q5T985|Q5T985_HUMAN	20306.8	26930.3	13127	35827.3	7883.75	186582	8741.43	204680	46986.1	22751.2	26874.9	86667.5	146592	161671	40433.9	129097	98634	3317.32	126658	29656	43696.6	204206	63061.2	53640.3
452	tr|Q5T985|Q5T985_HUMAN.AEDHFSVIDFNQNIR.+3	602.292	41.2	tr|Q5T985|Q5T985_HUMAN	18680.8	60199.5	25802.6	61906.5	77719.4	255371	27608.4	247331	123276	21600.3	69057.7	109412	199609	162373	67536.1	232687	176923	40056.7	125330	61431.1	96480.8	310425	122888	97260.2
453	tr|Q5T985|Q5T985_HUMAN.FYNQVSTPLLR.+2	669.364	36.64	tr|Q5T985|Q5T985_HUMAN	6241.21	702.438	493.078	9887.51	1860.3	313561	22323.7	296263	82733.3	172894	72916	129941	406876	334334	43740.6	288484	240463	36152.6	333100	19411.3	68248.8	431548	89892.9	95015.9
454	tr|Q5T985|Q5T985_HUMAN.NVVFDVQIPK.+2	579.83	43.96	tr|Q5T985|Q5T985_HUMAN	38656.1	36060.5	19916.1	42807.5	5220.9	10328.8	10515.2	108721	43574.9	2.76248e+06	17607.4	153177	51349.8	146702	30576.6	70785.4	30233.5	75586.6	228040	132451	28401.9	158539	211281	86678.4
455	tr|Q5T985|Q5T985_HUMAN.IYGNQDTSSQLK.+2	677.336	20.5	tr|Q5T985|Q5T985_HUMAN	18906.9	20689.4	11918.8	33143.4	8558.18	88553.5	9422.29	108492	44395.4	19689.8	14705.6	33634.8	44484.7	48193.4	8423.07	66526.3	35756.7	9356.58	33180.4	14748.7	11261.2	76587.5	40349.2	22657.3
456	tr|Q5T985|Q5T985_HUMAN.NVQFNYPHTSVTDVTQNNFHNYFGGSEIVVAGK.+4	921.693	34.33	tr|Q5T985|Q5T985_HUMAN	211.949	1118.16	27940.7	5254.1	1809.12	22695.9	3271.8	23691.9	3249.11	7375.26	55526	87897.8	25295.7	3946.47	28519.2	17210.7	7443.85	20553.4	2066.87	6326.61	2364.93	34514.1	19345.9	6043.67
457	tr|Q5T985|Q5T985_HUMAN.VVNNSPQPQNVVFDVQIPK.+2	1061.57	53.99	tr|Q5T985|Q5T985_HUMAN	2036.69	3783.65	518.246	3918.96	125.839	35954.8	2983.92	41476.1	10760.5	4154.65	2324.84	4320.14	34540.2	26074.7	2071.04	21082.3	5200.95	8749.73	13010.9	794.169	4117.06	48992.5	2972.59	7337.03
458	sp|P01857|IGHG1_HUMAN.THTC[CAM]PPC[CAM]PAPELLGGPSVFLFPPKPK.+4	711.87	49.51	sp|P01857|IGHG1_HUMAN	6554.99	6623.71	7110.27	3347.26	340.037	135451	35810.2	51283.8	9992.12	1.28306e+06	30468.7	371.311	30482.8	24076.9	347.066	817.332	423.895	391.914	89412.5	9595.72	12749.1	1256.65	1444.92	20972.1
459	sp|P01857|IGHG1_HUMAN.THTC[CAM]PPC[CAM]PAPELLGGPSVF.+2	1018.98	39.91	sp|P01857|IGHG1_HUMAN	1485.52	1352.74	250.995	3232.09	33477.3	11328.9	1512.39	2624.37	14758.6	1799.34	26939.9	2557.9	11735.1	37703.6	13711.5	17722.8	1191.95	4056.92	4115.43	3047.52	21013.6	14613.3	198.892	13766.2
460	sp|P01857|IGHG1_HUMAN.THTC[CAM]PPC[CAM]PAPELLGGPSVFLFPPKPK.+3	948.824	49.72	sp|P01857|IGHG1_HUMAN	2498.17	1433.7	1206.35	6379.93	1752.29	42699.6	7165.31	11089.8	415.931	412665	5328.91	2589.26	8472.39	1907.51	3483.27	549.132	762.863	5755.62	21882.9	2294.93	472.329	3490.15	1983.94	2965.25
461	sp|P01857|IGHG1_HUMAN.VSHEDPEVK.+2	520.256	10.77	sp|P01857|IGHG1_HUMAN	14482.1	11644.8	4712.89	869.192	13244.7	5937.51	11643.1	16148.1	4329.09	35378.1	345.167	30715.7	13512.9	44647.6	4945.15	12876.7	336.445	11599.8	2029.19	8746.54	7532.03	8038.89	11241.7	13407.2
462	sp|P68871|HBB_HUMAN.SAVTALWGK.+2	466.764	23.31	sp|P68871|HBB_HUMAN	7158.68	10249.4	11063.6	16516.1	3606.94	9280.61	9385.37	117387	38375	4.31993e+06	1680.09	629704	17419.4	204671	79467.4	9098.5	75541.7	8.47911e+06	17180.9	167230	6047.54	266739	83304.9	16841.2
463	sp|P68871|HBB_HUMAN.EFTPPVQAAY.+2	561.777	43.62	sp|P68871|HBB_HUMAN	14154.1	19841.1	40184.9	5731.8	6056.15	42323.1	10561.6	5648.03	41800.8	11326.6	39857.3	47504.4	41853.9	49098.6	37299.5	5734.58	5917.48	1.90703e+06	36739	26027.3	38307.5	17353	82919.2	53331.1
464	sp|P68871|HBB_HUMAN.VLVC[CAM]VLAH.+2	455.763	37.04	sp|P68871|HBB_HUMAN	5853.29	24269.4	2894.34	16719.7	6781.59	38190.8	4574.16	8150.27	20761	11416.8	12974.8	201035	1074.02	129845	5611.82	19460.4	1171.56	1.73837e+06	8432.25	32789.8	23701.4	44038.2	15820.8	23987.9
465	sp|P68871|HBB_HUMAN.ATLSELHC[CAM]DK.+2	587.282	32.72	sp|P68871|HBB_HUMAN	1639.05	135.552	6244.04	246.816	4053.77	2302.55	5628.7	19986.3	3333.18	1286.21	1201.45	14623.9	7414.46	9538.36	4953.69	3340.86	9279.4	85578.1	6917.22	8889.52	9012.77	15698	8714.49	17508.9
466	sp|P68871|HBB_HUMAN.VNVDEVGGEALGR.+3	438.893	42.76	sp|P68871|HBB_HUMAN	2521.27	10466.7	2909.77	5335.78	11970.6	4499.05	667.231	51310.5	61818.1	664428	10175.4	67516.2	4352.57	15719	7299.86	15948.9	18246.1	1.62297e+06	16930	35368.2	7514.06	24440.8	43841.7	3191.63
467	sp|P68871|HBB_HUMAN.VLVC[CAM]VLAHHFGK.+3	460.592	43.42	sp|P68871|HBB_HUMAN	782.297	1510.13	2708.39	1299.93	7402.18	2120.97	9903.43	7420.91	5049.85	2358.03	11357	1247.71	3023.97	20377.8	5512.13	260.324	537.742	21008.9	25683	702.465	1003.42	13828.3	4277.95	612.619
468	sp|P68871|HBB_HUMAN.EFTPPVQAAYQ.+2	625.806	47.42	sp|P68871|HBB_HUMAN	7825.95	6291.56	9706.84	11773.1	10763.3	7746.36	9458.46	8279.17	73071.4	1315.07	14490	23718.8	59661.2	12755.1	25832.7	60095.6	26300.1	116933	26141.1	17852.3	9739.19	59719.4	3298.3	10998.9
469	sp|P68871|HBB_HUMAN.VLAHHFGK.+2	454.759	29.18	sp|P68871|HBB_HUMAN	15135.6	110.991	13541.1	3861.33	6783.99	13965.1	10403.7	10875.2	18110.6	13798.2	2877.04	24601.2	28045.6	11129.8	5143.63	5862.2	16416.7	16838.8	8544.92	17696.4	5249.79	12174	14956.3	7770.85
470	sp|P68871|HBB_HUMAN.VC[CAM]VLAHHFGK.+2	584.308	62.02	sp|P68871|HBB_HUMAN	3203.38	10855	5624.21	282.296	340.271	22379.6	2134.28	8043.43	24319.3	1.09817e+06	7824.6	19788.3	3031.51	31649	12659.5	6053.26	1002.55	391686	11243.4	20278.5	15970.6	17124.3	9812.26	698.689
471	tr|A0A0U1RRJ0|A0A0U1RRJ0_HUMAN.SDLSFQFK.+2	486.245	37.46	tr|A0A0U1RRJ0|A0A0U1RRJ0_HUMAN	56837.7	87760	48666.4	52049.2	85045.5	90581.8	18664.1	120916	188968	52266.7	237487	474923	173141	292194	59759.1	80119.7	118774	58255.4	109456	73180.4	78631.7	187939	78742.6	122938
472	tr|A0A0U1RRJ0|A0A0U1RRJ0_HUMAN.IDSAPGLGDFLQLHIEQGK.+3	680.025	51.34	tr|A0A0U1RRJ0|A0A0U1RRJ0_HUMAN	34404.9	48891.2	20134.5	29824.2	37234.6	43387.6	498.134	67701.8	82986.6	20034	80669.7	118957	57885.6	115021	29907.2	165540	6283.61	18692.8	42129	15255.6	35872.6	105243	24307.3	35718.4
473	tr|A0A0U1RRJ0|A0A0U1RRJ0_HUMAN.YNRPVEEWLQEK.+3	530.935	33.53	tr|A0A0U1RRJ0|A0A0U1RRJ0_HUMAN	34815.3	39499	7947.93	38697.5	42891	36666.9	3202.33	59128.8	45780.2	16919.5	48069	124808	7427.37	63831.1	16592.8	4338.51	61124	41615.3	40093.6	35688.9	5512.57	37227.4	18222.9	8444.26
474	tr|A0A0U1RRJ0|A0A0U1RRJ0_HUMAN.PSALTLDGVQAMPGFK.+2	816.427	41.58	tr|A0A0U1RRJ0|A0A0U1RRJ0_HUMAN	831.364	20179.4	35760.9	14582.3	5627.59	2876.43	27420.3	8010.53	4365.23	582.664	66989.5	43120	30914.7	8273.6	4704.67	7083.39	9374.91	5550.2	32709.3	17322	5647.92	10081.9	34862.2	4031.54
475	tr|A0A0U1RRJ0|A0A0U1RRJ0_HUMAN.GPETLYAGQK.+2	532.274	21.89	tr|A0A0U1RRJ0|A0A0U1RRJ0_HUMAN	20384.9	21260.7	16824.1	26516.1	26713.5	28559	5209.53	15737.7	20479.8	9057.55	26848	54739.8	43634	59939.5	6613.38	41311.6	53159.9	14609	16212.9	12429.4	24529.2	52913.4	37387	15222
476	tr|A0A0U1RRJ0|A0A0U1RRJ0_HUMAN.LFQGQLSGLYYDGLK.+2	851.446	48.04	tr|A0A0U1RRJ0|A0A0U1RRJ0_HUMAN	28982.8	37866	25219.3	31485.4	29710.3	54469.4	11043.3	73725.6	70979.5	32020.4	82780.2	85732.8	75700.3	54778.1	21268.8	38231.4	2286.57	13833.7	57590.6	21318.6	41900.7	102210	5901.22	34876
477	tr|A0A0U1RRJ0|A0A0U1RRJ0_HUMAN.FSMDC[CAM]AETAVLSNK.+2	786.855	39.91	tr|A0A0U1RRJ0|A0A0U1RRJ0_HUMAN	26302.3	14664.5	15443.9	19488.1	19442.7	20299.6	4691.59	16721.7	41581	2673.93	40748.4	88728.8	24368.5	28971.9	11214.9	2342.52	14647.1	5578.5	6419.44	5463.86	2256.37	19809.3	8581.26	5539.29
478	tr|A0A0U1RRJ0|A0A0U1RRJ0_HUMAN.VLNMAAENNPNIK.+2	714.369	28.35	tr|A0A0U1RRJ0|A0A0U1RRJ0_HUMAN	41760.1	43973.7	21932.5	31740.5	3992.07	14816.2	5976.92	10776.5	28417.6	6025.59	46820.1	51991.5	10895.7	32131.5	1205.04	5903.89	37789	14264.9	12445.5	9016.39	6551.04	23495.1	9436.33	5833.65
479	tr|A0A0U1RRJ0|A0A0U1RRJ0_HUMAN.LTVDDDVAEGTMVGDHTR.+3	644.298	32.9	tr|A0A0U1RRJ0|A0A0U1RRJ0_HUMAN	7712.7	10942.3	6123.37	12886.1	10575.2	6980.99	24136.4	9326.5	13803.8	5818.49	32814	36143.4	9431.69	25170.4	4792.42	10901.7	13973.9	6269.98	35258.9	17070.4	5776.42	19500.6	8994.58	7987.27
480	tr|A0A0U1RRJ0|A0A0U1RRJ0_HUMAN.LEFMGLPNQWAR.+2	731.369	43.98	tr|A0A0U1RRJ0|A0A0U1RRJ0_HUMAN	13107.5	28313.8	3165.9	12712.6	13124.8	52702	9699.95	36059.9	101237	28061.3	203780	146003	67441.8	126506	23024.5	1918.82	2591	17431.5	84749	15086	41239.6	2989.92	27163.2	48472.4
481	sp|Q8WXD2|SCG3_HUMAN.TEAYLEAIR.+2	533.282	33.5	sp|Q8WXD2|SCG3_HUMAN	214450	476848	211596	344581	450069	542501	126909	604406	733533	74270.7	570915	1.64231e+06	593971	746620	161005	255423	826563	245548	466855	226763	302103	646142	147411	201262
482	sp|Q8WXD2|SCG3_HUMAN.FQDDPDGLHQLDGTPLTAEDIVHK.+4	666.075	41.92	sp|Q8WXD2|SCG3_HUMAN	137921	140691	81262.9	94749.3	127375	150922	11661.3	160683	126214	12036.2	98720.3	409941	182952	176387	25592	72417.4	272255	41449.5	131076	55562.3	68060.4	122359	38038.1	32906.4
483	sp|Q8WXD2|SCG3_HUMAN.ELSAERPLNEQIAEAEEDK.+3	724.354	35.22	sp|Q8WXD2|SCG3_HUMAN	232992	255559	168632	191138	218892	246921	129263	295519	157258	3962.93	141627	709625	155230	232445	30551.8	122747	371916	57029.8	179783	131217	69094.2	173820	56058.4	88880.7
484	sp|Q8WXD2|SCG3_HUMAN.LLNLGLITESQAHTLEDEVAEVLQK.+3	921.831	59.48	sp|Q8WXD2|SCG3_HUMAN	48890.1	50884.5	35746.5	38630.2	40117.3	75611.7	9695.87	82292.5	84644.9	18920.9	29658.5	159354	124890	77519.6	16107.9	34443	0	10287.1	64195.4	18615.9	36986.5	73850.7	8975.13	39573
485	sp|Q8WXD2|SCG3_HUMAN.GILDKEEAEAIK.+3	439.242	30.1	sp|Q8WXD2|SCG3_HUMAN	198724	197990	131068	162467	192294	187705	79310.6	237636	278650	12283.3	209433	529313	132278	271274	64185.4	104386	13366.5	3332.12	171443	58979.7	112468	215624	10539.1	77189.1
486	sp|Q8WXD2|SCG3_HUMAN.PLNEQIAEAEEDK.+2	743.357	29.27	sp|Q8WXD2|SCG3_HUMAN	110167	111705	67241.5	114058	254021	43698.7	16006	78715.8	57285.6	2529.39	55534.8	272010	29524.5	85208.4	19389.9	44251.9	134230	111700	37943.2	75560.7	291.125	32576.6	60628.3	52464.1
487	sp|Q8WXD2|SCG3_HUMAN.ELSAERPLNEQIAEAEEDKIK.+4	603.812	36.11	sp|Q8WXD2|SCG3_HUMAN	54594.2	92743.3	45966.3	69763	43205.4	145296	53015	1099.09	115317	81525.7	14118.1	261672	67195.1	2927.74	9125.52	41877.7	175300	8891.07	60399.2	3219.11	6236.42	53992.4	1593.44	27283
488	sp|Q8WXD2|SCG3_HUMAN.ELSAERPLNEQIAEAEEDKI.+3	762.048	40.89	sp|Q8WXD2|SCG3_HUMAN	102810	112654	67949.5	72102.4	92283.9	89249.2	37295.7	90737.5	39147.7	2841.03	36922.4	154463	7524.96	60354.5	15798.7	51755.2	135942	16884.7	77407.2	64531.1	24236.5	51530.3	17910.3	34563
489	sp|Q8WXD2|SCG3_HUMAN.LLNLGLITESQAH.+2	704.893	48.24	sp|Q8WXD2|SCG3_HUMAN	45472.2	35621.6	23110.4	38197.1	76067.4	35972.1	1956.95	52430.8	36176.7	20954.6	27348.3	159892	9924.84	14742.6	7990.55	14718.3	9780.23	40410.6	9385.2	68078.6	3146.35	29302.2	37832.3	26121.5
490	sp|Q9UBP4|DKK3_HUMAN.DQDGEILLPR.+2	578.304	36.59	sp|Q9UBP4|DKK3_HUMAN	2.88065e+06	2.12987e+06	2.08998e+06	2.27656e+06	2.59941e+06	2.63401e+06	2.05042e+06	2.95589e+06	3.54554e+06	978533	3.31837e+06	6.05361e+06	2.54693e+06	4.10612e+06	795733	1.40692e+06	2.83429e+06	1.52968e+06	2.48918e+06	2.38704e+06	2.22449e+06	4.15586e+06	1.1574e+06	884703
491	sp|Q9UBP4|DKK3_HUMAN.SAVEEMEAEEAAAK.+2	732.83	30.36	sp|Q9UBP4|DKK3_HUMAN	1.33555e+06	938403	958512	1.00738e+06	858444	546873	109779	358882	844178	120453	1.04742e+06	1.68947e+06	249515	682679	38918.1	105049	486741	303037	256351	318901	427412	691748	306603	150496
492	sp|Q9UBP4|DKK3_HUMAN.GLLFPVC[CAM]TPLPVEGELC[CAM]HDPASR.+3	855.426	60.73	sp|Q9UBP4|DKK3_HUMAN	4072.43	4315.71	8432.85	11722.2	8883.27	76692.8	15285.8	31701.8	87200.9	6146.38	38544.6	30958.4	19578.7	22030.7	13957.6	19785.8	1746.13	2138.01	6164.95	316.65	34234.1	53204.7	461.647	6847.14
493	sp|Q9UBP4|DKK3_HUMAN.EPAAAAAALLGGEEI.+2	691.862	55.88	sp|Q9UBP4|DKK3_HUMAN	7709.93	297585	10814.2	271384	285828	1929.9	9841.52	504248	520473	3190.96	8437.79	1901.87	387220	45030.3	9482.19	227774	725.464	6343.77	12943.7	14219.8	18424.1	10163.6	35291.9	5845.63
494	sp|Q9UBP4|DKK3_HUMAN.DC[CAM]QPGLC[CAM]C[CAM]AFQR.+2	756.313	33.64	sp|Q9UBP4|DKK3_HUMAN	9336.75	14067.8	9298.18	2522.51	7156.03	20297.7	2318.82	10789.9	3775.51	2668.87	1730.09	1897.22	180.125	20932.2	1018.84	6525.1	9971.27	6932	5577	5811.81	7709.91	2246.39	228.867	920.391
495	sp|Q9UBP4|DKK3_HUMAN.EVEELMEDTQHK.+3	496.561	25.7	sp|Q9UBP4|DKK3_HUMAN	1.01095e+06	614097	646764	784058	595622	345087	54572.5	216989	544039	68047.9	779763	1.05046e+06	145901	423976	28412.2	85364.8	410261	177248	156150	159273	217463	329308	171281	93696.3
496	sp|Q9UBP4|DKK3_HUMAN.QELEDLER.+2	516.254	25.52	sp|Q9UBP4|DKK3_HUMAN	451347	383779	284724	311501	291927	119532	321171	5850.82	1.14983e+06	187493	755543	1.41493e+06	635176	561004	192377	373053	768903	349829	337824	568587	486390	945634	182277	148474
497	sp|Q9UBP4|DKK3_HUMAN.SETVITSVGDEEGR.+2	739.852	27.87	sp|Q9UBP4|DKK3_HUMAN	216459	136602	157993	190553	327090	54722.4	29129.7	102506	163518	5146.83	111129	493357	15782.1	139033	16077.2	16880.6	22078.8	192502	560.743	230148	45138.3	92986.5	150083	32079
498	sp|Q9UBP4|DKK3_HUMAN.SLTEEMALR.+2	525.268	25.65	sp|Q9UBP4|DKK3_HUMAN	24017.2	253809	22904	212860	135182	47468.6	23553.6	165601	336824	1465.76	4088.36	10794.2	131274	8801.1	21501.8	55684.4	85678	10011.2	24820.1	55017.6	9105.17	7609.38	15851.8	17891.1
499	sp|P08697|A2AP_HUMAN.LC[CAM]QDLGPGAFR.+2	617.306	33.49	sp|P08697|A2AP_HUMAN	14865.2	53928.1	33891.3	82289.6	33147.9	355693	43891.5	427857	162071	118147	136827	300546	618785	515622	99652.7	306063	393553	90832.7	327675	113269	182352	337331	91438.3	192550
500	sp|P08697|A2AP_HUMAN.WFLLEQPEIQVAHFPFK.+3	710.379	57.25	sp|P08697|A2AP_HUMAN	27631.6	26918.5	13772.2	26464.7	310.338	133648	5743.52	136743	20489	62010.3	33642.4	99391	147326	192202	10828.4	52899.3	358.911	14754	35257.5	12918.5	40829.5	62606.9	55789.4	42018.5
501	sp|P08697|A2AP_HUMAN.LQQVLHAGSGPC[CAM]LPH.+3	538.612	31.04	sp|P08697|A2AP_HUMAN	61532.2	42965.7	32337.7	42944.7	16515.8	122878	15259.4	168642	55070.5	4180.5	37352.6	102930	48218.3	171232	2656.74	57748.5	8728.71	20098.3	42122.3	13979.7	36850.9	74597.8	29831.1	59584.6
502	sp|P08697|A2AP_HUMAN.EDFLEQSEQLFGAK.+2	820.894	53.19	sp|P08697|A2AP_HUMAN	97464.9	68747.3	682.99	117135	73069.5	113737	930.229	151436	109813	3557.69	71528.8	183943	62792.9	208829	27920.8	81927.1	316.854	87785.9	66950.7	152811	45897.3	112230	198470	137701
503	sp|P08697|A2AP_HUMAN.LQQVLHAGSGPC[CAM]LPHLLSR.+4	521.536	34.13	sp|P08697|A2AP_HUMAN	695.106	3659.58	2214.68	4730.05	303.643	76665.8	5618.11	48972.6	8324.76	154204	10564.5	1009.3	477850	41631.3	12354.8	104531	117520	2779.49	169261	2327.53	52157.2	123420	1042.2	14939.7
504	sp|P08697|A2AP_HUMAN.NQEQVSPLTLLK.+2	685.388	44.78	sp|P08697|A2AP_HUMAN	82978.7	85613.1	52571.5	90323.4	32155.3	246385	28401.7	67054.2	25283.7	78705.7	119540	210972	358699	265451	40732.9	200252	237432	30584.7	292977	78882.6	94761.4	239839	108973	22241.5
505	sp|P08697|A2AP_HUMAN.GFPIKEDFLEQSEQLFGAK.+3	728.372	54.42	sp|P08697|A2AP_HUMAN	107876	88444.7	76907	90017	39364.7	208496	16078.6	278503	142489	42202.3	99452.4	131004	320359	274191	53414.1	185616	1414.58	8797.64	205369	45548.9	113381	274149	63388.4	101284
506	sp|P08697|A2AP_HUMAN.HQMDLVATLSQLGLQELFQAPDLR.+3	908.478	58.23	sp|P08697|A2AP_HUMAN	14564.1	9130.02	6912.99	10842.7	5058.42	35752.7	1683.92	32777.5	13231.5	14662.6	23636	5328.58	39810.7	41516.8	5063.65	6227.88	0	3273.83	15974.7	8119.73	18484.8	33833	14931.4	18064
507	sp|P08697|A2AP_HUMAN.DSFHLDEQFTVPVEMMQAR.+3	760.686	53.2	sp|P08697|A2AP_HUMAN	7384.32	20120	13649.8	820.65	22419.4	97491.1	4405.87	54942	32358	37632.7	50912.5	24287.2	83267.3	66843.4	3749.2	23488.7	1071.48	3335.73	45346	14747	41831.8	55437.8	3229.13	16738.5
508	sp|P02452|CO1A1_HUMAN.SLSQQIENIR.+2	594.323	32.58	sp|P02452|CO1A1_HUMAN	23397.4	89241	39027	58907.9	36610.1	123774	18550.2	99159.9	84925.1	51522	113210	183062	137554	198821	36736.8	49193.6	8446.32	32427.6	109747	48670.8	70786.3	163310	1240.86	67918.1
509	sp|P02452|CO1A1_HUMAN.ALLLQGSNEIEIR.+2	728.412	42.94	sp|P02452|CO1A1_HUMAN	118900	199407	104895	159987	101665	151974	2250.12	108964	36349.8	34406.9	36177.6	266388	125462	255041	44473	68105.6	119858	53938.5	73738.1	93666.3	85336.4	196546	24485.1	121652
510	sp|P02452|CO1A1_HUMAN.VLC[CAM]DDVIC[CAM]DETK.+2	733.829	31.09	sp|P02452|CO1A1_HUMAN	9878.4	15172.5	5014.56	16930.3	2790.31	222461	614.694	63623.5	33272.6	15540.9	14378.5	38464.4	14753.9	26637.4	5342.94	51069.9	93102.6	19551.2	25263.3	23228.7	14226.7	41151.9	3229.54	21094
511	sp|P02452|CO1A1_HUMAN.NSVAYMDQQTGNLK.+2	784.872	27.83	sp|P02452|CO1A1_HUMAN	41271.7	51227.8	30342	37760.1	18946.8	23025.4	3388.76	8724.58	13912.1	958.929	23268.8	31893.9	6871.12	20900.9	1113.37	6075.85	13017.9	702.12	4767.76	8033.99	5804.57	13412.5	4067.27	7458.91
512	sp|P02452|CO1A1_HUMAN.DRDLEVDTTLK.+2	652.838	27.56	sp|P02452|CO1A1_HUMAN	17416.2	25017.4	8475.04	8744.94	6178.12	16520.2	1747.52	9391.12	43460.9	7314.22	10076.6	2549.96	24098	33644.4	5711.26	6230.45	27471.9	12111.1	21496.1	17906	6010.27	28586	16857.5	8328.38
513	sp|P02452|CO1A1_HUMAN.GESGPSGPAGPTGAR.+2	649.31	15.58	sp|P02452|CO1A1_HUMAN	34272.5	44186.8	23855	40170.5	25751.3	6566.39	3153.8	5590.76	17541	2981.11	20718.7	16120.4	9383.6	17445.8	4305.07	1832.06	10223.6	5755.82	9398.3	41746.2	1607.05	9382.27	3356.36	8839.69
514	sp|P02452|CO1A1_HUMAN.DVWKPEPC[CAM]R.+2	593.787	18.99	sp|P02452|CO1A1_HUMAN	619.959	2753.54	1426.12	13284.4	47142.3	65110.6	17233.6	9029.46	14549.3	44495.8	8560.14	32543	1293.81	14517.7	6311.25	87161.1	78376.1	9369.95	1930.46	7341.15	14005.9	4246.43	5552.9	22750.5
515	sp|Q9Y6R7|FCGBP_HUMAN.LPVVLANGQIR.+2	590.364	38.26	sp|Q9Y6R7|FCGBP_HUMAN	44290	41217.7	119221	11796.6	27124.8	65060.6	14316.4	103064	102987	113292	78374.1	67743.9	180367	271769	49550.3	145713	113510	18735.5	87258.8	102987	54063.6	93421.9	3609.73	70812
516	sp|Q9Y6R7|FCGBP_HUMAN.LPVSLSEGR.+2	479.272	20.37	sp|Q9Y6R7|FCGBP_HUMAN	51835.9	28910.9	45257.8	10835.7	13184.5	34808.7	2715.44	9986.55	65557.1	15904.5	48939.6	19973.5	54348.3	101492	23673.9	59222.5	2982.7	27835.4	18945.9	41848.7	47413.1	64849.1	21666.1	20611.3
517	sp|Q9Y6R7|FCGBP_HUMAN.VAYDLVYYVR.+2	630.835	37.54	sp|Q9Y6R7|FCGBP_HUMAN	23475	49591	83386.2	19380.5	27496.1	67062.2	14756.3	123019	116326	133026	148245	50524.7	212694	233639	77235.7	181464	101908	24796.8	127923	100373	128168	221627	22218.3	97819.2
518	sp|Q9Y6R7|FCGBP_HUMAN.VSYVGLVTVR.+2	546.824	39.16	sp|Q9Y6R7|FCGBP_HUMAN	9556.33	19614.9	36798.9	8764.18	7842.26	34788.1	3247.07	83048.4	91655.4	38728.5	73122.5	44145.6	81903.1	144816	34472.3	90380.9	36398.4	2678.38	46851.2	32589.2	64547.3	132083	7434.95	33011.3
519	sp|Q9Y6R7|FCGBP_HUMAN.PGDEDFSIVLEK.+2	674.835	44.61	sp|Q9Y6R7|FCGBP_HUMAN	8048.65	1473.66	28812.5	6774.63	5454.46	2352.53	14142.5	6891.7	12864.3	12205.9	3637.56	10644.9	25448.5	3074.15	1267.79	7277.52	21287.1	9439.99	5082.57	27851.5	311.07	1083.3	4966.45	4993.99
520	sp|Q9Y6R7|FCGBP_HUMAN.VAVIVSNDHAGK.+3	403.891	18.35	sp|Q9Y6R7|FCGBP_HUMAN	22398.1	34605.7	48718.8	8300.23	19733	9273.52	933.902	25410.4	53414.5	20418	34292.8	34199.5	10765.5	54100.4	21138.7	47163.6	3131.76	3258.27	4782.93	5204.63	4927.96	31494.9	16596.3	21702.3
521	sp|Q9Y6R7|FCGBP_HUMAN.YDLAFVVASQATK.+2	706.875	45.66	sp|Q9Y6R7|FCGBP_HUMAN	25733.5	54566.6	78621.8	13602.2	16074.1	18096.6	9823.59	37704.3	100630	38442.3	75397.7	29305.3	63787	104790	36608.1	70950.2	621.028	4488.28	35131.4	26798.1	57377.8	114537	6794.51	40461.5
522	sp|Q9Y6R7|FCGBP_HUMAN.SVPGC[CAM]EGVALVVAQTK.+2	807.93	38.55	sp|Q9Y6R7|FCGBP_HUMAN	1178.21	5653.86	9553.34	563.472	933.768	456.666	216.91	8273.01	18452.3	6172.63	15996.5	2866.79	212.446	964.036	1058.23	11534.5	4068.19	18954.7	1480.43	1420.69	6638.81	8048.59	3066.83	4021.82
523	sp|Q9Y6R7|FCGBP_HUMAN.GEVGFVLVDNQR.+2	666.849	40.48	sp|Q9Y6R7|FCGBP_HUMAN	7324.85	24553.7	38072.2	5809.07	14690.5	20010.4	1149.04	52973.9	77185.3	19443.9	45496.6	32889.4	48304.1	81005.8	18587	55378.6	26656.3	2615.31	27524.4	21191.9	47670.9	86309.6	12878.1	25420.8
524	sp|Q9Y6R7|FCGBP_HUMAN.VNGVLTALPVSVADGR.+2	784.444	45.89	sp|Q9Y6R7|FCGBP_HUMAN	32219.1	53697.6	45345.3	27884.3	10868.8	43317.2	20124.1	116305	114895	73310.5	59108.7	101997	128663	82085.9	53705.6	110445	21824.5	12152.5	48091.3	122894	136788	186963	37554	66709.6
525	sp|P10643|CO7_HUMAN.LTPLYELVK.+2	538.323	45.33	sp|P10643|CO7_HUMAN	213518	280474	309132	318879	207718	505595	164684	507921	422371	212298	643176	1.21486e+06	728441	1.23739e+06	264296	492237	10510.6	341916	877650	340882	1.33518e+06	587187	364461	511382
526	sp|P10643|CO7_HUMAN.DGFVQDEGTMFPVGK.+2	813.877	44.37	sp|P10643|CO7_HUMAN	84298.8	58391.5	46049.2	197.731	25825.8	9366.16	5093.09	2492.94	18052.3	670.404	16466.3	73684.4	8553.47	8941.45	18722.5	7847.99	29518.9	12109.2	38454.6	18216.9	8430.57	12916	530.949	18514.1
527	sp|P10643|CO7_HUMAN.LIDQYGTHYLQSGSLGGEYR.+3	753.034	37.98	sp|P10643|CO7_HUMAN	18545	82241.4	48232.2	51333.6	29431.8	138169	13986.8	148611	119809	44470.3	179350	254755	220832	276798	55294.6	132951	155985	44504.7	174043	43239.3	432791	181153	70463	110286
528	sp|P10643|CO7_HUMAN.YSAWAESVTNLPQVIK.+2	903.475	50.03	sp|P10643|CO7_HUMAN	76264.2	68790.2	69378.3	69348.5	42605.7	84870.3	11072.1	86684.7	91909.3	21303	95537.2	161300	82968.8	148063	29547.1	59726.8	1653.54	25142	101545	35955.2	185518	103929	64995.9	73502.7
529	sp|P10643|CO7_HUMAN.ELSHLPSLYDYSAYR.+3	605.297	41.5	sp|P10643|CO7_HUMAN	12473.1	98150.3	53203.4	63167.8	39738.3	238461	66783	238482	162648	97672.6	275010	236546	265961	275875	47699.1	151389	231725	56416.2	266605	68872.4	412711	213998	11431	159685
530	sp|P10643|CO7_HUMAN.GQSISVTSIRPC[CAM].+2	652.835	32.72	sp|P10643|CO7_HUMAN	74002.1	64146.4	56054.6	71978.3	40271.4	260369	23753.5	284698	186358	9930.34	142870	327719	125400	218046	31306.1	155767	195950	37690	116192	65597.5	478670	263022	14641.2	91611.7
531	sp|P10643|CO7_HUMAN.AC[CAM]GAC[CAM]PLWGK.+2	560.257	29.11	sp|P10643|CO7_HUMAN	101059	79767.5	105810	109158	60533.1	173755	116542	186730	114745	63959	129569	281934	165868	250719	55570.6	120639	141229	55202.1	173439	75836.2	294431	140725	14178.4	101618
532	sp|P10643|CO7_HUMAN.LSGNVLSYTFQVK.+2	728.396	45.7	sp|P10643|CO7_HUMAN	23129.5	16201.1	19824.1	557.905	641.97	66973.2	18558.4	53688.5	20099.5	44672.1	30455.2	34037.6	123571	59245.9	8953.68	44873	85900.1	3372.19	106419	1826.36	119859	52839.2	2047.18	5967.58
533	sp|P10643|CO7_HUMAN.SSGWHFVVK.+2	523.774	31.17	sp|P10643|CO7_HUMAN	19326.3	33825.1	29604.3	27008.6	10376.6	42360.3	4372.83	53955.8	11920.8	10583.7	24035.4	55778.2	23559.4	78264.8	3138.87	4512.52	10984.9	22619.8	33002.8	16533.1	84667	36274.9	14297.4	26275.4
534	sp|P10643|CO7_HUMAN.SC[CAM]VGETTESTQC[CAM]EDEELEHLR.+3	837.02	30.23	sp|P10643|CO7_HUMAN	1618.18	20205.5	17292.7	16691.7	9054.6	33081.7	993.121	15232.9	37297.7	4218.17	62366.7	33944.7	33096.7	49328.1	11313.6	22310.8	66754.1	5275.03	18735	4092.8	114578	30692	6608.64	14091
535	tr|B4DPQ0|B4DPQ0_HUMAN.VLNYVDWIK.+2	575.319	47.02	tr|B4DPQ0|B4DPQ0_HUMAN	145218	168936	230967	145416	135017	196430	21346.5	241342	198092	94376.6	305309	543290	288268	409140	111266	198022	52853.2	89485	300091	135767	368547	415289	111074	156447
536	tr|B4DPQ0|B4DPQ0_HUMAN.LFGEVTSPLFPK.+2	667.871	49.04	tr|B4DPQ0|B4DPQ0_HUMAN	317719	289954	373229	240717	238180	275014	12669	415828	345901	1549.62	499626	901391	301969	588630	157978	270870	1504.74	159803	307342	258855	551947	661012	195877	230550
537	tr|B4DPQ0|B4DPQ0_HUMAN.LPVANPQAC[CAM]ENWLR.+2	834.42	51.98	tr|B4DPQ0|B4DPQ0_HUMAN	5663.25	8794.44	10714.7	8587.87	10780.9	48189.6	14585.2	10722.7	15469.2	26465.1	38462.5	15200.4	45227.5	73426.7	30933.7	14380.4	124113	1258.02	31789.6	5270.99	82279.6	58551.5	2107.38	17306.6
538	tr|B4DPQ0|B4DPQ0_HUMAN.PYPNNFETTTVITVPTGYR.+2	1085.54	45.55	tr|B4DPQ0|B4DPQ0_HUMAN	10814.5	25549.1	20095.8	19838	14722.2	51123.7	2539.46	77243.1	57218.8	2715.76	65633.4	123414	52231.5	109662	11534.5	28782.9	50835.6	10299.1	52725	12852.7	79875.7	103722	14704.3	35782.5
539	tr|B4DPQ0|B4DPQ0_HUMAN.FC[CAM]GQLGSPLGNPPGK.+2	764.882	34.83	tr|B4DPQ0|B4DPQ0_HUMAN	35854.3	43199.4	45119	47807.4	28554.7	55028.4	4894.46	37178.4	52526.1	10382.9	40545.9	90284.3	21896.3	55320.8	12060.1	20883.6	76615.4	11147.2	23168.5	14029	65685.3	79808.2	10501.1	10958.6
540	tr|B4DPQ0|B4DPQ0_HUMAN.FLEPFDIDDHQQVHC[CAM]PYDQLQIYANGK.+4	823.386	48.04	tr|B4DPQ0|B4DPQ0_HUMAN	1328.84	15810.4	5028.59	2229.71	2944.62	16411.6	1250.74	10684.9	3359.94	4157.22	4372.63	20628.9	16589.8	2419.71	4543.38	6370.28	3889.27	6580.1	19200.8	3350.27	5820.33	7428.75	2386.4	3262.27
541	tr|B4DPQ0|B4DPQ0_HUMAN.TLDEFTIIQNLQPQYQFR.+2	1127.58	44.11	tr|B4DPQ0|B4DPQ0_HUMAN	1540.68	2935.54	17905	13726.4	13493.5	61598.8	22992.3	89457.3	64302.4	52633.6	89802.7	83969.1	108586	115963	23627.2	49433.5	135.438	2261.71	95195.8	13378.8	121628	160962	16052.1	50822.8
542	tr|B4DPQ0|B4DPQ0_HUMAN.ESEQGVYTC[CAM]TAQGIWK.+2	928.928	37.33	tr|B4DPQ0|B4DPQ0_HUMAN	11003.9	5122.26	19570.3	9495.91	1908.35	11457	984.174	7471.42	1937.66	8016.54	10161.9	12914.9	12494.2	6986.38	7207.01	4835.46	18841	3489.2	2461.31	11402.4	49156	22668.4	33991.9	5370.51
543	tr|B4DPQ0|B4DPQ0_HUMAN.QDAC[CAM]QGDSGGVFAVR.+2	783.852	35.29	tr|B4DPQ0|B4DPQ0_HUMAN	965.604	22807.8	13928.1	11859.9	12114.9	55323	36107.9	65474.2	21307.3	31497.4	22672.7	108383	62180.8	67793.2	580.29	7497.92	51088.1	19425.9	66529.2	27797.7	54945.2	58444.4	3632.12	24663.4
544	sp|P04114|APOB_HUMAN.FPEVDVLTK.+2	524.29	40.52	sp|P04114|APOB_HUMAN	5183.78	57900.8	5255.04	4357.79	4748.55	131230	55307	222502	1317.38	29931.2	15659.6	45241.7	13665.3	359525	4908.7	16250.8	11890.9	41805.9	4341.4	20803.1	5232.47	121872	33043.1	16769.1
545	sp|P04114|APOB_HUMAN.ILGEELGFASLHDLQLLGK.+3	685.049	73.74	sp|P04114|APOB_HUMAN	76.8819	607.255	1604.09	6173.78	3335.35	420.08	950.997	18504.4	82.5963	3835.57	3153.23	2115.01	1633.65	9827.66	4711.93	1165.66	252.398	12316.6	3339.36	460.188	1508.46	149231	18130.4	649.406
546	sp|P04114|APOB_HUMAN.LTISEQNIQR.+2	601.33	36.77	sp|P04114|APOB_HUMAN	10861.3	3987.44	8001.7	4862.83	14881.7	32605	2022.61	43602.1	2512.05	7253.44	14508.6	14604.2	20652.9	42928.2	1670.85	14949.4	21325.5	10936.9	12302.1	9067.98	26867.4	137818	8442.68	778.845
547	sp|P04114|APOB_HUMAN.EFQVPTFTIPK.+2	653.856	50.63	sp|P04114|APOB_HUMAN	15270.9	812.095	310.655	8820.8	10161	48494.3	34753.7	52591.1	5382.73	17163.2	25593.7	4668.64	24219.4	30016.2	670.714	30015	323.459	14378.3	61513	4074.89	7916.77	287171	10140.1	3398.41
548	sp|P04114|APOB_HUMAN.ITENDIQIALDDAK.+2	779.902	40.1	sp|P04114|APOB_HUMAN	2542.57	5218.14	5520.88	2230.5	1514.76	25040.1	1547.76	21827.6	2994.88	18539.7	2578.87	5384.53	51323.7	16868.1	1653.35	4494.31	1157.27	7857.5	2431.99	2670.76	5136.55	162851	271.737	86140
549	sp|P04114|APOB_HUMAN.VPSYTLILPSLELPVLHVPR.+3	748.444	54.94	sp|P04114|APOB_HUMAN	5240.24	3642.03	2013.65	2453.96	3596.31	33853.1	2871.85	32479.5	1301	12680.1	1788.78	12801.6	1377.58	10398.5	374.426	733.909	0	2514.34	3617.44	2922.63	1873.55	278235	3472.93	8187.43
550	sp|P04114|APOB_HUMAN.TLADLTLLDSPIK.+2	700.406	50.34	sp|P04114|APOB_HUMAN	2451.66	123.146	107.716	424.186	3553.46	17454.6	208832	18047.8	2349.04	2632	2234.58	6990.54	5686.85	3654.18	7842.44	4747.08	259.663	4061.98	2912.69	6535.53	1920.2	192545	5784.86	658.848
551	sp|P04114|APOB_HUMAN.IAIANIIDEIIEK.+2	727.927	56.62	sp|P04114|APOB_HUMAN	3987.46	4837.52	2355	192.864	6184.17	26999.2	736.939	16683.8	2833.81	9789.26	7467.52	6775.26	8577.82	8764.22	222.37	4019.69	0	1731.48	876.159	635.848	3142.19	263936	1206.67	413.267
552	sp|P04114|APOB_HUMAN.IAELSATAQEIIK.+2	693.896	41.08	sp|P04114|APOB_HUMAN	6277.2	4048.18	2573.58	3412.96	2036.32	32570.7	4550.69	28499.3	1669.85	3042.51	623.122	5404.14	19292.1	18891	1954.41	42892.1	18513.5	10574.9	4592.48	2661.1	3877.63	242149	5342.09	7363.08
553	sp|P54289-2|CA2D1_HUMAN.FVVTDGGITR.+2	532.79	31.65	sp|P54289-2|CA2D1_HUMAN	44045.5	108697	49804.5	66501.5	93979.2	140877	73774.7	164737	199342	79577.6	208096	425454	183835	289671	109649	101218	175180	92698.4	178484	109763	132804	282377	89205.4	154866
554	sp|P54289-2|CA2D1_HUMAN.INTQEYLDVLGR.+2	710.875	45.06	sp|P54289-2|CA2D1_HUMAN	12461.7	41162.3	17027	28220.7	30351.2	68340.4	4857.64	76460.4	86593.4	3403.63	120673	188121	43707.2	121616	60516.8	31266.1	54065.3	48365.8	41365.3	1417.66	62435.7	122787	56534.3	85145.2
555	sp|P54289-2|CA2D1_HUMAN.IKPVFIEDANFGR.+3	502.609	39.26	sp|P54289-2|CA2D1_HUMAN	47151.2	51264.1	34772.1	46183.1	54790.4	83174.3	35945.1	92100.3	88831.2	43060.2	127293	267713	122336	151515	63129.8	63033	137941	44593.5	119017	61345.5	72125.4	153349	62229.9	105491
556	sp|P54289-2|CA2D1_HUMAN.GYYYEIPSIGAIR.+2	751.388	47.94	sp|P54289-2|CA2D1_HUMAN	18404.3	53678.5	28294.7	36652.6	45446.6	75635.1	9394.43	88244.7	95392.3	15740	191102	252180	80135.7	154534	67286.3	51425.6	4536.79	47774.3	81591.5	53987.1	85355.1	193132	70809.5	128024
557	sp|P54289-2|CA2D1_HUMAN.AVEIYIQGK.+2	510.79	37.6	sp|P54289-2|CA2D1_HUMAN	17475.4	65682.9	34694.9	43611.9	70725	6859.82	20453.2	62704.7	96729.7	10827.5	84547.1	189428	80830.5	94436.7	52202.5	39612.2	2830.42	42127.7	54481.2	53663.4	91395.1	183126	48219.7	75050
558	sp|P54289-2|CA2D1_HUMAN.TASGVNQLVDIYEK.+2	768.899	41.15	sp|P54289-2|CA2D1_HUMAN	41001.1	53470.3	20764.4	31609.1	41944.5	34076.1	18106.8	39760.7	49002.7	8766.18	64656.7	131286	39312	67430.5	17930.7	23031.2	44168.2	16339.2	53341	31419.4	27945	74268.2	23182.5	34402.3
559	sp|P54289-2|CA2D1_HUMAN.DSETLKPDNFEESGYTFIAPR.+3	806.048	44.62	sp|P54289-2|CA2D1_HUMAN	55991.9	59829.3	64116.2	38095.7	53643.3	33857.7	37122.6	48919.4	83905.7	77613.7	85245.6	145746	5745.67	9591.5	24367.5	28856.2	35532.1	1008.53	63344.6	2940.02	42087.2	86489.9	38658.8	68745
560	sp|P54289-2|CA2D1_HUMAN.SQEPVTLDFLDAELENDIK.+2	1088.54	57.47	sp|P54289-2|CA2D1_HUMAN	22123	18887.2	13338.6	12978.6	19134.3	19032.5	12002.1	23667.5	38233.6	6351.68	38425.3	62767.2	22474.8	35564.2	12537.5	12373.7	164.44	13229.7	28186.5	14155.7	21556.9	45028.1	21759.9	31863.9
561	sp|P54289-2|CA2D1_HUMAN.LEETITQAR.+2	530.785	22.07	sp|P54289-2|CA2D1_HUMAN	54185.7	91522.5	45314.4	64895.4	92321.3	67861.4	12825	43422.4	106528	24643.8	118625	227744	53308.1	136998	61323.3	55546.9	81509.4	27191.6	58454.4	48730.7	41806.3	109160	60852.8	92456.9
562	sp|P54289-2|CA2D1_HUMAN.SYDYQSVC[CAM]EPGAAPK.+2	836.37	27.69	sp|P54289-2|CA2D1_HUMAN	6902.37	17099.3	5447.15	6307.99	9395.29	26533.8	13199.9	32267.1	33954.5	5342.3	25867.9	62064.7	10202.2	30362.4	6099.61	19612.5	28364.4	5365.6	14824	11395.8	18344.7	28074	4102.84	18402.3
563	tr|F8VVB6|F8VVB6_HUMAN.AFLFQDTPR.+2	547.785	39.37	tr|F8VVB6|F8VVB6_HUMAN	374822	225419	218488	337384	374329	602599	308966	584101	530786	283634	782008	2.29695e+06	731070	1.21983e+06	407754	401256	779282	396496	723488	674110	386270	984689	693726	652736
564	tr|F8VVB6|F8VVB6_HUMAN.ASTATAEQFFQK.+2	664.828	32.96	tr|F8VVB6|F8VVB6_HUMAN	140704	134749	83143.9	122608	152623	198311	58245.3	200631	281273	78291.1	280076	766571	243961	469596	108500	120710	208725	96108.5	150337	143196	207707	452587	214889	196160
565	tr|F8VVB6|F8VVB6_HUMAN.YLELESSGHR.+2	595.794	22.27	tr|F8VVB6|F8VVB6_HUMAN	79033.9	60293.4	34500.7	58458.3	61895.1	68642.6	22953.1	80817.3	117361	87375.1	56496.5	134075	41823.6	92718.2	16464.9	36094.2	35528.4	9837.28	21881.2	49669.6	39471.9	88133.5	62343.7	40444.4
566	tr|F8VVB6|F8VVB6_HUMAN.VVEKPSTDLPLGTTF.+2	802.433	44.28	tr|F8VVB6|F8VVB6_HUMAN	58783.5	58163.1	33672.6	55114.8	57379.2	52723.7	404.826	69191.8	134172	5847.01	147840	396274	72154.6	252294	60736.9	47634.5	70515.7	39607.6	54383.9	68706	99659.9	213030	95869.6	94148.8
567	tr|F8VVB6|F8VVB6_HUMAN.VVEKPSTDLPLGTTFWLGQR.+3	748.739	50.14	tr|F8VVB6|F8VVB6_HUMAN	44054.4	68553.1	31620.8	34995.9	39943.3	238024	76755.6	207316	165129	168454	153577	153108	240463	119016	12695	92251	1175.15	19304.2	279042	55896.1	75405.3	195922	8139.22	124904
568	tr|F8VVB6|F8VVB6_HUMAN.SALAYVDGK.+2	462.245	26.69	tr|F8VVB6|F8VVB6_HUMAN	119111	91385.9	50600	113770	126064	194408	89454.4	278734	360980	84934.3	216045	631601	187821	321889	123952	187627	362355	124427	208284	172124	164667	478135	80415.6	186611
569	tr|F8VVB6|F8VVB6_HUMAN.IMELQDILAK.+2	587.331	48.02	tr|F8VVB6|F8VVB6_HUMAN	58589.7	57611.2	29776.4	56333.8	54062.8	67887.6	14079.3	26732.6	106699	9246.62	101477	85573.1	32472.6	64927.3	11838.8	16029.5	5426.16	24941.3	26379.9	39748.1	46143.7	69159.4	24213.4	33184.6
570	tr|F8VVB6|F8VVB6_HUMAN.TC[CAM]PTC[CAM]NDFHGLVQK.+3	559.589	27.32	tr|F8VVB6|F8VVB6_HUMAN	28282.2	29282.1	1587.9	22647.4	8600.35	105947	10848.5	57241.7	88186.3	8864.81	61410.2	156250	30737.4	88870	1225.17	18820	89.7714	22799.3	10176.1	7762.77	29502	2376.11	4524.22	1518.41
571	tr|F8VVB6|F8VVB6_HUMAN.LVESSGC[CAM]PALDC[CAM]PESHQITLSH.+3	813.042	44.36	tr|F8VVB6|F8VVB6_HUMAN	8701.5	12389.3	7269.05	15897.3	360.169	529.537	2139.22	24263.7	39945.8	9673.36	25725.8	151060	15309	4184.35	2073.96	12469.1	28558.7	5075.07	19625.9	18420.3	13996.4	48280.7	1339.84	22938.2
572	tr|F8VVB6|F8VVB6_HUMAN.LVESSGC[CAM]PALDC[CAM]PESHQITLSHSC[CAM]C[CAM]K.+4	743.831	41.82	tr|F8VVB6|F8VVB6_HUMAN	13481	4080.88	32164.8	12067.8	11347.8	56922.3	1540.01	58391.8	47700.2	46433.5	4830.96	37354.7	85322.6	22427.2	12788.2	29767.5	62162.6	3108.66	43597.2	1201.92	72097.1	141068	1406.26	21870.4
573	sp|P04196|HRG_HUMAN.GGEGTGYFVDFSVR.+2	745.849	44.88	sp|P04196|HRG_HUMAN	23716.7	36184.1	48208.6	80259.5	27607.8	110400	123825	337315	157731	126920	65861.4	305630	351105	297091	45153	313678	261283	50389.9	201130	86355.2	88109.6	195520	176588	124460
574	sp|P04196|HRG_HUMAN.ADLFYDVEALDLESPK.+2	912.949	56.04	sp|P04196|HRG_HUMAN	185090	49309.5	136524	152564	46226.7	86315.5	91548.8	342210	178801	174603	39878.4	395990	394639	295054	54616.7	343171	1355.27	155951	180036	80349.1	122839	232740	340086	133300
575	sp|P04196|HRG_HUMAN.YKEENDDFASFR.+3	507.56	28.65	sp|P04196|HRG_HUMAN	17699.2	14338	34682.5	51316.7	30246.3	32804.3	56193.2	99704.3	51056.7	86667	35429.8	35623.4	239080	72686.7	30986.4	108568	55427	58875	70981.1	30132.1	59599.5	87077.7	122872	65684.8
576	sp|P04196|HRG_HUMAN.DGYLFQLLR.+2	562.809	46.51	sp|P04196|HRG_HUMAN	4176.02	21206.2	26361	40827.5	19480.8	66333.7	71332.8	11707.2	110024	115615	58134.7	1276.88	329027	212504	35828.5	351436	509.988	140408	190678	52728.3	961.775	140170	6640.68	106265
577	sp|P04196|HRG_HUMAN.KGEVLPLPEANFPSFPLPH.+3	697.042	55.64	sp|P04196|HRG_HUMAN	337109	79391.3	222650	293020	105795	56317.6	5817.03	217128	73429.1	1238.02	19339.5	692710	30509	90323.1	14484	107961	162.509	19611.9	43638.7	31382.8	23586	56477.9	253657	78504.6
578	sp|P04196|HRG_HUMAN.IADAHLDR.+2	455.741	14.76	sp|P04196|HRG_HUMAN	84233.8	17581	59982.2	82281.2	32152.1	13139.7	23858.8	53848.2	30538.1	12241	12409.9	25159.2	46405.1	34998.3	13741	71634	54810.6	26280.6	30969.3	35189.6	13100.9	26513	43461.8	16018.5
579	sp|P04196|HRG_HUMAN.DHSHGPPLPQGPPPLLPM.+3	629.658	48.04	sp|P04196|HRG_HUMAN	302792	81690	202106	253024	116777	6922.05	70253.1	36826	3086.2	67922.7	76872.7	98968.7	11504.4	2087.53	61710.7	8896.43	333.622	15445.1	3365.51	21128.7	62595.4	12199.6	15060.2	8850.41
580	sp|P04196|HRG_HUMAN.RPSEIVIGQC[CAM]K.+3	429.568	21.55	sp|P04196|HRG_HUMAN	33294.9	38575.8	44786	57385.8	14026.3	35153.8	20795.5	36312.2	18549.8	19649.2	10390.2	31331	19878.3	8019.8	31228.2	31768.2	107477	1537.82	5368.74	25626.9	25310.7	28473.3	35531.4	4761.86
581	sp|P04196|HRG_HUMAN.YWNDC[CAM]EPPDSR.+2	719.788	25.2	sp|P04196|HRG_HUMAN	97447.6	2712.84	78312.9	83752.5	45493.7	62028.1	29220.6	238368	93531.6	16596.7	35935	194302	65067.6	152909	12659.3	156157	110401	59077.6	44647.8	14992.4	19732.6	43707.3	107224	56347.8
582	sp|P04196|HRG_HUMAN.GEVLPLPEANFPSFPLPH.+2	981.012	58.08	sp|P04196|HRG_HUMAN	37775.6	2510.85	6170.26	40818.9	9244.69	22757	3578.72	69559.5	20776.1	16803.4	1903.43	127907	542.726	40932.9	11421.6	32165.5	0	81448.9	2240.2	42264.1	13658.5	29015.3	56125.3	31515.5
583	sp|P05546|HEP2_HUMAN.TLEAQLTPR.+2	514.79	28	sp|P05546|HEP2_HUMAN	188986	131787	57158.9	147116	92510.1	486616	78564.6	577693	272097	118559	235528	452885	459862	619911	74545.8	262106	376905	50252	239989	154395	159732	464590	172108	110094
584	sp|P05546|HEP2_HUMAN.SVNDLYIQK.+2	540.29	27.74	sp|P05546|HEP2_HUMAN	94364.7	66118	32369.2	69544	52671.4	317019	19316.7	422712	164902	73463.3	132764	269358	233010	403034	43889.4	161453	204129	42961.8	117817	89701.9	85576.8	271911	113489	69376.8
585	sp|P05546|HEP2_HUMAN.GPLDQLEK.+2	450.245	30.23	sp|P05546|HEP2_HUMAN	60036.6	42307	32931.2	52316.3	46236	167402	40408.4	141041	42448.7	50686.5	56021.9	137909	201270	203173	3974.2	102918	20513.3	38510.8	117261	78527.5	78384.9	161542	76379.1	55412.3
586	sp|P05546|HEP2_HUMAN.NYNLVESLK.+2	540.29	36.48	sp|P05546|HEP2_HUMAN	68312.6	52646.1	22039.7	59582.9	40308.4	216861	11676	269087	121299	77147.3	122352	210888	243023	321381	32281.8	137174	168232	27490.2	129697	70800.6	66700.5	253160	110159	62238.1
587	sp|P05546|HEP2_HUMAN.YEITTIHNLFR.+3	469.586	40.28	sp|P05546|HEP2_HUMAN	17880.3	25764.6	23994.4	13768.1	5463.24	281538	9741.13	307659	109580	63275.6	153853	233397	348285	525721	52448	176632	197536	26616.6	128137	42748.2	144051	341624	63167.5	69735.5
588	sp|P05546|HEP2_HUMAN.IADFSDPAFISK.+2	655.835	41.08	sp|P05546|HEP2_HUMAN	31633.2	22398.7	9047.75	34884.7	29534.6	33078.9	20308.4	64182.4	41851.4	5453.56	50542.3	140797	26132.9	87539.9	8186.48	5842.02	14598.4	40534.3	15661.7	84829.3	19551.4	56370.2	96385.6	28885.4
589	sp|P05546|HEP2_HUMAN.FTVDRPFLFLIYEHR.+4	489.015	52.31	sp|P05546|HEP2_HUMAN	6195.02	5200.01	135.195	2728.56	5265.32	145701	3376.43	141892	2211.76	35981.6	1205.97	61536.7	85633.2	91023.1	3913.56	28883.7	2244.35	6217.83	36975	20398.1	25997.1	74175.1	8952.49	22024.6
590	sp|P05546|HEP2_HUMAN.FTVDRPFLF.+2	571.306	52.8	sp|P05546|HEP2_HUMAN	32128.8	23933	18578.8	31663.1	26141.7	74410.9	7626.19	115488	49088	6514.19	72994	191150	74474.3	338783	33342.6	64727.6	1639.68	158.373	21213.7	17534.4	57095.4	157971	63294.3	26619.6
591	sp|P08571|CD14_HUMAN.AFPALTSLDLSDNPGLGER.+2	987.002	52.44	sp|P08571|CD14_HUMAN	85370.6	47136.2	53032.9	56815.4	46111.3	186935	91624.3	204150	197945	83030.4	225601	387085	170081	286777	43010.7	116770	656.863	81824.7	208633	125897	241393	217059	113269	187454
592	sp|P08571|CD14_HUMAN.LTVGAAQVPAQLLVGALR.+2	889.038	56.62	sp|P08571|CD14_HUMAN	15334.9	52570.4	34872.9	47815	29284.9	481088	51242.8	533279	456297	194482	609793	797706	543456	959241	159163	388377	133.247	135893	579452	130962	641719	546144	174889	537915
593	sp|P08571|CD14_HUMAN.FPAIQNLALR.+2	571.838	58.2	sp|P08571|CD14_HUMAN	3717.58	8012.35	5104.91	5500.64	8518.09	212967	50318.3	100070	45811.8	165054	145523	36672.1	231778	125212	10625.5	101784	6339.24	5420.41	267750	802.998	83618.3	71205	15432.5	129136
594	sp|P08571|CD14_HUMAN.SWLAELQQWLKPGLK.+3	599.673	58.28	sp|P08571|CD14_HUMAN	10010.5	937.668	5301.32	2898.06	2613.47	123829	126.397	105074	234.508	86464.6	36886.6	119047	146799	146534	18707	66548.2	0	7045.01	147574	19606.8	80525.9	94999.9	9780.21	52605
595	sp|P08571|CD14_HUMAN.LTVGAAQVPAQLLVGAL.+2	810.988	59.43	sp|P08571|CD14_HUMAN	32452.1	14132	36482.1	773.206	12044.5	21931.6	2431.33	29144.3	38851.1	2786.02	15550.7	7227.63	5999.71	618.437	2323.53	8701.5	0	8467.61	529.945	34087.6	17532.1	21069.1	8937.82	1675.1
596	sp|P08571|CD14_HUMAN.VLSIAQAHSPAFSC[CAM]EQVR.+3	667.339	19.61	sp|P08571|CD14_HUMAN	854.686	40790.4	28882.5	8266.34	5646.6	228129	504.937	124901	98510.6	119219	78154	80964.9	114586	127539	22422.6	129021	207214	15145.5	98814.3	15628.4	156961	192815	3900.93	27966.9
597	sp|P08571|CD14_HUMAN.VLDLSC[CAM]NR.+2	488.748	25	sp|P08571|CD14_HUMAN	125506	96505	95981.3	115116	101342	458024	150041	384239	252671	142311	197854	377237	184656	267066	86617.8	204006	249919	97589.9	191304	122135	232035	190315	72286.1	200042
598	sp|P08571|CD14_HUMAN.ITGTMPPLPLEATGLALSSLR.+2	1069.6	58.8	sp|P08571|CD14_HUMAN	10089	3464.39	12590.2	10065	1885.84	55975.8	67.8818	11464.3	47289.2	18130.3	110538	61136.5	23377.1	4811.7	7392.29	13956.8	0	2652.62	36126.5	189.062	49841.2	38934.6	13471.2	2781.79
599	sp|P08571|CD14_HUMAN.SLDLSHNSLR.+2	571.302	30.39	sp|P08571|CD14_HUMAN	8506.65	18621.5	1370.78	14679.1	6107.91	57004.6	16534.7	55602.1	48188.4	2487.49	47684.1	68717	49292.6	75306.5	7762.45	33576	51151.4	16572.2	14134.7	41435	40755.9	31927.7	8529.83	3815.43
600	sp|P00734|THRB_HUMAN.ETAASLLQAGYK.+2	626.333	35.28	sp|P00734|THRB_HUMAN	367719	308143	239164	390181	183691	606106	38007.9	843305	435698	25817.3	260718	404839	694715	456842	73564.4	313172	416683	108441	556519	105020	138051	701806	330897	275706
601	sp|P00734|THRB_HUMAN.ELLESYIDGR.+2	597.804	40.02	sp|P00734|THRB_HUMAN	403927	339062	256455	396554	192869	68572	52284.3	768720	51267.5	130336	257952	459462	729951	395095	63998.2	363078	426710	96182.1	540765	137254	123233	721182	350539	252592
602	sp|P00734|THRB_HUMAN.TATSEYQTFFNPR.+2	781.368	39.58	sp|P00734|THRB_HUMAN	159087	110482	89837	138033	64926.6	230982	32751.9	320742	123754	70178.1	84203.6	126395	318246	122989	9233.59	98792.4	151234	16727.2	241153	28965.1	27178.2	204198	41581.5	81569.1
603	sp|P00734|THRB_HUMAN.GQPSVLQVVNLPIVER.+2	874.507	53.69	sp|P00734|THRB_HUMAN	214180	172883	118353	240270	112464	146293	163.564	289065	248094	446.929	136788	244390	83182.8	184239	19032.3	71148.5	37.66	65768.7	91472.5	71346.6	37367.9	243506	255502	180778
604	sp|P00734|THRB_HUMAN.SEGSSVNLSPPLEQC[CAM]VPDR.+2	1035.99	38.42	sp|P00734|THRB_HUMAN	106119	84457.8	69562.2	92724.2	28477.5	297960	27199.8	353498	200930	67574.9	70049.9	135439	259453	118567	8011.73	86695.1	138581	8304.57	174964	3943.96	33528	389774	20681.6	58776.4
605	sp|P00734|THRB_HUMAN.LAVTTHGLPC[CAM]LAWASAQAK.+3	665.688	44.19	sp|P00734|THRB_HUMAN	18772.5	22918	19968.1	27170.6	5481.73	121698	21291.7	103650	59824.5	56949	24096.4	30869.2	139909	51120.1	13488.5	60647.6	276024	10001.3	193483	8153.16	13011.3	232436	5937.74	27338.1
606	sp|P00734|THRB_HUMAN.SGIEC[CAM]QLWR.+2	574.779	42.73	sp|P00734|THRB_HUMAN	6611.12	16980.4	6371.03	24188	1698.15	49982.7	3425.77	26768.6	29352.3	22474	32087.6	55424	36248.1	21452.1	3770.34	6633.52	54134.3	6876.35	2628.68	13244	10974.8	23960.2	14303.4	6251.35
607	sp|P00734|THRB_HUMAN.LAAC[CAM]LEGNC[CAM]AEGLGTNYR.+2	984.949	45.7	sp|P00734|THRB_HUMAN	3825.45	13779.1	1302.93	11485.8	3856.41	191393	13498.3	192071	63089.6	5867.36	27467.2	41790.9	111471	66254.2	6910.65	67157.3	106324	3941.3	120161	570.619	16449.2	205258	4427.14	31126
608	sp|P00734|THRB_HUMAN.SEYQTFFNPR.+2	644.802	47.44	sp|P00734|THRB_HUMAN	9012.38	11686.8	7037.34	8242.89	8223.94	67423.1	9066.14	61761.6	60683.3	17791.6	29729.6	17359.6	10446.1	13687.1	38144.8	53499.9	61064.3	24478.2	79129.4	24285.9	20584.3	12286.1	2822.75	23020.4
609	sp|P01042|KNG1_HUMAN.QVVAGLNFR.+2	502.288	43.89	sp|P01042|KNG1_HUMAN	28228.5	85799.6	13880	57081.2	23701.7	124406	16131.9	50446.4	194521	767654	181652	60545.3	1.49876e+06	127447	66253.5	274670	31003.8	1474.49	94203.8	21987.4	382659	750153	42911.7	32676.1
610	sp|P01042|KNG1_HUMAN.ENFLFLTPDC[CAM]K.+2	692.334	47.92	sp|P01042|KNG1_HUMAN	87493.1	106102	54709.2	110674	41109.7	130337	13569.6	134173	75403.8	59821.9	59918.2	37419.4	191362	173281	33559.5	114911	24440.2	67399.2	79053.8	107250	92501.3	166236	45662.1	82274.3
611	sp|P10451-5|OSTP_HUMAN.LLAPQTLPSK.+2	534.327	30.04	sp|P10451-5|OSTP_HUMAN	12755.2	23672	19590.1	2256.78	9447.17	10722.9	4977.23	22870.4	18656.1	459.074	10518.8	25433.5	16484.4	13033.6	1127.22	11335.1	6099.08	13125.5	11126.8	7151.74	5298.57	23405.2	9716.14	3516.8
612	sp|P10451-5|OSTP_HUMAN.QNLLAPQTLPSK.+2	655.377	33.73	sp|P10451-5|OSTP_HUMAN	7659.04	23851.5	8898.41	8574.16	10105.3	14744.2	24646.8	28692.1	32916.2	4767.98	21738.4	5936.39	45563	12149.2	2949.62	3092.03	2674.93	8963.03	7167.41	909.296	2558.09	55624.8	5296.95	3216.44
613	sp|Q92859-2|NEO1_HUMAN.VLPDPEVISDLVFLK.+2	842.482	59.07	sp|Q92859-2|NEO1_HUMAN	15452.4	23599.9	13172.7	15392	15485.6	30006.3	16731.4	36392.7	93775.8	299.467	117654	130461	53399.2	81562.3	35810.8	45088.9	0	22990.7	100785	22966.8	60997.2	74866.1	15909.5	52580.3
614	sp|Q92859-2|NEO1_HUMAN.LIVAGLPR.+2	419.779	31.16	sp|Q92859-2|NEO1_HUMAN	3523.43	116314	90586	141877	7186.37	166419	48068.9	236543	186129	78655.4	272794	733198	249678	416568	127812	153291	313033	149629	237222	170786	164213	214207	154670	182404
615	sp|Q92859-2|NEO1_HUMAN.VPEVPSSLHVR.+3	407.231	29.58	sp|Q92859-2|NEO1_HUMAN	5264.89	8289.57	3454.02	3329.77	4927.79	19261.2	1891.6	17207	19039.2	6545.73	43478.7	33050.5	8144.69	45062.7	27157.6	14769.1	24015.9	1682.96	5739.39	6738.64	6055.01	13668.5	706.902	39445.8
616	sp|Q92859-2|NEO1_HUMAN.ITWADNSLPK.+2	572.803	35.48	sp|Q92859-2|NEO1_HUMAN	27899.7	29096.2	15880.3	13769.8	24806.9	35615.5	8953.5	58092.7	41807.2	5011.22	54694.5	137754	41719.6	81510.2	17756.7	10662.3	49494.6	7444.11	55978.7	35025.1	34540.7	70357.8	25551.5	28850.3
617	sp|Q92859-2|NEO1_HUMAN.YYTIENLDPSSHYVITLK.+3	719.369	46.72	sp|Q92859-2|NEO1_HUMAN	5848.8	621.178	3598.76	3310.03	1469.82	3732.37	377.849	2294.39	16721.5	759.65	18476.9	29844.9	22518.4	30022.7	1933.93	6863.5	949.962	1385.62	37729.1	9863.7	10719.7	20717.7	358.464	219.855
618	sp|Q92859-2|NEO1_HUMAN.YSDEVELK.+2	491.74	24.25	sp|Q92859-2|NEO1_HUMAN	37223.6	33495.9	23215.5	28874.8	31264.8	8931.39	3421.9	54755.2	68087.1	32866.9	54611.3	109637	11396.6	16937.3	30451.9	22484.2	23034.6	33823.7	66312.9	22473.4	12613.6	32597.6	8833.02	14658.5
619	sp|Q92859-2|NEO1_HUMAN.EHNLQVLGLVK.+3	417.247	36.83	sp|Q92859-2|NEO1_HUMAN	25065	34642.9	23317.6	27677.4	28695.4	47992.7	18955.2	58083.9	67165.4	34566.9	83733.1	149610	48915.3	90282.9	29338.3	37285.7	85281.4	20598.4	82240.1	17236.7	52490.7	75249.4	24862.9	51438.7
620	sp|Q92859-2|NEO1_HUMAN.SDVTETLVSGTQLSQLIEGLDR.+3	787.743	55.24	sp|Q92859-2|NEO1_HUMAN	4115.31	5261.79	11944.4	4316.76	13152.1	19112.8	8785.16	25597.8	33062	9940.93	28473.1	89900.2	14409	52229.7	1958.94	8767.48	0	10891.2	13770.9	15857.7	12804.2	26020.1	16487	24587.4
621	sp|Q92859-2|NEO1_HUMAN.VETQPEVQLPGPAPNLR.+2	922.997	40.04	sp|Q92859-2|NEO1_HUMAN	4936.25	11530.4	6157.79	7000.18	5048.17	23179.6	22465.3	30572.8	26102.3	15817.7	28918.8	43725.6	39900.6	41336.7	5948.96	12866.7	36309.2	768.822	40164.6	4919.35	22209.6	34065.1	2886.15	8625.51
622	sp|Q92859-2|NEO1_HUMAN.LTHQIQELTLDTPYYFK.+3	704.033	46.43	sp|Q92859-2|NEO1_HUMAN	8309.66	15438.2	6422.37	1282.59	692.275	3023.84	5424.97	19971.6	61014.8	37769.3	93789.9	65582.5	55134.3	61784.8	27698.1	14805.9	1606.76	8734.54	6054.01	11420	11493.4	124711	45893.7	53726.3
623	sp|Q96PD5|PGRP2_HUMAN.EFTEAFLGC[CAM]PAIHPR.+3	582.287	41.37	sp|Q96PD5|PGRP2_HUMAN	49969.8	37733.9	8556.29	5087.24	9620.83	193202	15231.8	140869	77561.6	61848	1095.03	145142	91398.2	103712	26040.5	166814	143381	30057.1	81380.7	34261.9	62473.8	131954	1199.26	8692.31
624	sp|Q96PD5|PGRP2_HUMAN.SLPLLMDSVIQALAELEQK.+3	700.054	63.25	sp|Q96PD5|PGRP2_HUMAN	11703.2	4114.09	8006.46	7332.2	3749.88	45010.5	459.848	23416.6	18570.6	7652.41	4758.7	44151.8	30199.1	43143.2	4649.12	10048.7	0	6100.25	20678.9	8767.96	11817.4	26656.6	14434	8575.92
625	sp|Q96PD5|PGRP2_HUMAN.TDC[CAM]PGDALFDLLR.+2	746.859	59.55	sp|Q96PD5|PGRP2_HUMAN	7922.65	12016	11175.9	21199.1	6815.33	144666	17765.3	147388	79423.6	94012.7	57114.9	83852.2	114890	144240	28421.5	145752	279.244	48587.1	183117	41799.2	64136.4	130464	32403.6	54434.3
626	sp|Q96PD5|PGRP2_HUMAN.PSLSHLLSQYYGAGVAR.+3	606.988	44.66	sp|Q96PD5|PGRP2_HUMAN	12592.2	24536.7	17066.2	33559.9	13274.8	133337	4416.24	167779	66357.5	64299.5	44603.6	54491.9	76688	88864.2	11067.2	81340.3	590.999	17316	133122	19880.7	44610	88843.4	17971.9	39334.9
627	sp|Q96PD5|PGRP2_HUMAN.GC[CAM]PDVQASLPDAK.+2	679.324	28.55	sp|Q96PD5|PGRP2_HUMAN	60636	40767.9	37532.3	67254.5	4095.81	118692	21357.8	116184	64370.7	42304.8	36970.4	70710.6	59633.2	84175.5	19861.3	84330.2	62323.2	25678.7	68500.9	32230.6	42104.1	96028.1	14136.2	22007.2
628	sp|Q96PD5|PGRP2_HUMAN.EYGVVLAPDGSTVAVEPLLAGLEAGLQGR.+3	961.182	67.84	sp|Q96PD5|PGRP2_HUMAN	621.5	628.94	6756.49	9906.06	342.223	32607.7	2776.19	43650.5	29440.4	12130.4	9467.73	20539.2	32453.2	31461.6	9615.94	28518.9	0	4024.83	41753.8	4837.54	21611.3	39181.2	13892.9	15688
629	sp|Q96PD5|PGRP2_HUMAN.LLQLPLGFLYVHHTYVPAPPC[CAM]TDFTR.+4	764.652	47.73	sp|Q96PD5|PGRP2_HUMAN	11716.6	543.008	6014.95	1060.47	2191.91	46089.2	2072.65	17334.3	11671.6	49142.1	8538.6	23566.4	48858.1	24729.4	5231.84	31626.5	323.37	10959.7	33658.1	16629.8	16526.3	28981.7	7397.97	12042.9
630	sp|Q96PD5|PGRP2_HUMAN.AGLLRPDYALLGHR.+3	517.963	36.98	sp|Q96PD5|PGRP2_HUMAN	14525.1	6756.09	13915.7	31787.7	3019	31802.2	910.741	30108.1	3932.28	443.114	1287.87	39533.2	244.874	11237.6	1695.69	19041.2	14795.6	7829.62	22484.8	13876.1	6691.97	15179	10075.8	8414.83
631	sp|Q96PD5|PGRP2_HUMAN.AFLNGALDGVILGDYLSR.+2	947.507	60.81	sp|Q96PD5|PGRP2_HUMAN	3376.41	1277.07	10121.3	3748.09	1034.62	46035.6	2557.21	52629.2	18208.1	23643.2	2479.42	11012.5	25596.2	40378	2058.04	4317.54	0	691.329	119361	7079.55	2146.13	37064.7	615.552	1004.03
632	sp|Q96PD5|PGRP2_HUMAN.DGSPDVTTADIGANTPDATK.+2	973.453	30.79	sp|Q96PD5|PGRP2_HUMAN	13115.1	8659.06	10093.2	14692.7	4584.73	14142.5	6667.19	24989.3	7874.27	6278.78	14315.4	23521.3	9036.26	2219.75	1981.64	5671.96	239.412	1929.17	3411.59	14925	6061.06	2466.37	6687.7	220.435
633	sp|Q15113|PCOC1_HUMAN.PAPLVAPGNQVTLR.+2	716.917	36.13	sp|Q15113|PCOC1_HUMAN	33267.3	153330	86786.2	98717.8	54711.1	241594	12276.5	267111	171176	50404.7	201245	679621	253862	524513	31299.3	148808	267035	69796.1	332818	37720.7	174223	262384	32798.7	141569
634	sp|Q15113|PCOC1_HUMAN.VFDLELHPAC[CAM]R.+3	452.896	36.72	sp|Q15113|PCOC1_HUMAN	25629.7	78084	43405.3	53327.7	20750.6	265243	20884	192374	108529	202085	151346	370901	322024	339264	51072.9	236062	297971	34079.6	308367	35672.6	208638	278934	8084.35	81384.4
635	sp|Q15113|PCOC1_HUMAN.IIAPPDQVIALTFEK.+2	827.974	53.75	sp|Q15113|PCOC1_HUMAN	100103	96778.3	78668.6	83491.4	58251.3	80955.1	399.022	81131.2	76701	6730.21	54479.8	265732	2765.08	112934	8100.25	36003.5	197.629	36852.6	28146.9	52805.6	37880.9	64650.6	5134.36	60828.8
636	sp|Q15113|PCOC1_HUMAN.YDALEVFAGSGTSGQR.+2	829.394	42.4	sp|Q15113|PCOC1_HUMAN	97735.5	113423	87991.5	83375.7	61289.7	110268	5921.87	109937	89545.9	89177.3	108716	233755	151941	232209	22508.9	74872.2	79304.9	27459.1	126260	42769.5	114562	163336	8675.44	57526.4
637	sp|Q15113|PCOC1_HUMAN.GVSYLLMGQVEENR.+2	797.898	42.89	sp|Q15113|PCOC1_HUMAN	170006	223117	172877	184885	100959	85184.9	9815.78	63418.2	95572.6	979.512	110600	284234	61728.8	150312	8110.69	34237	75542	34468	76350.4	55491.6	60464.8	99565.3	28903.6	40821.1
638	sp|Q15113|PCOC1_HUMAN.FC[CAM]GTFRPAPLVAPGNQVTLR.+3	734.393	35.63	sp|Q15113|PCOC1_HUMAN	1057.47	3767.43	9478.12	11429.3	3341.19	3164.92	117355	1428.85	3950.64	122923	2604.05	9895.83	11686.8	20959.7	537.924	1137.02	11950	6298.69	16796	32103.4	8705.48	323.197	3841.89	9151.85
639	sp|Q15113|PCOC1_HUMAN.TGGLDLPSPPTGASLK.+2	755.909	40.99	sp|Q15113|PCOC1_HUMAN	323338	358632	300028	300265	209449	63287.9	33667.3	88367.2	109505	3874.28	43604.3	696970	50338.3	156073	12076.8	42103.7	41354.7	83671.2	63031	106221	111773	95793.2	43060.6	43334.9
640	sp|Q15113|PCOC1_HUMAN.YDSVSVFNGAVSDDSR.+2	859.387	37.04	sp|Q15113|PCOC1_HUMAN	45887.8	32558.8	40000.7	29197.9	27695.2	87386.9	49198.2	75841.8	39727.3	26440.2	42474.8	197045	74996	105445	2495.32	38296.7	50954.2	23861.5	66255.4	28364.1	40076.3	70700.3	24958.5	35203.5
641	sp|Q15113|PCOC1_HUMAN.VVLHRPNQDQILTNLSK.+3	659.041	31.98	sp|Q15113|PCOC1_HUMAN	12046.9	16823.2	12293.6	16115.1	7453.34	5059.02	3731.78	1460.76	3251.32	5276.77	2638.18	42075.9	4348.21	30332.5	928.712	4404.96	1095.02	3847	2322.2	2547.15	8900.17	979.384	18787.5	2411.81
642	sp|Q15113|PCOC1_HUMAN.GESGYVASEGFPNLYPPNK.+2	1013.48	42.86	sp|Q15113|PCOC1_HUMAN	63833.3	72649.6	60558.3	57614.8	43145	56383.1	47280.2	45527.8	46229.1	13817.5	49133.2	136246	47447.5	84448.4	5634.62	35869.5	36949.3	6893.19	14083	22475	46257.6	66737.6	1749.31	31668.9
643	tr|A0A087WTA8|A0A087WTA8_HUMAN.GETGPSGPVGPAGAVGPR.+2	781.9	27.11	tr|A0A087WTA8|A0A087WTA8_HUMAN	43218.6	48046.2	28819	37355.9	31206.5	26918.4	5716.52	34630.1	35329	6912.95	35190.4	68255.3	27176.3	62122.8	8407.71	19966.4	39395.4	12224	28259.2	3973.91	12035.9	44394.7	5340.8	14259.7
644	tr|A0A087WTA8|A0A087WTA8_HUMAN.GEAGAAGPAGPAGPR.+2	618.31	16.71	tr|A0A087WTA8|A0A087WTA8_HUMAN	59355	64615.9	37621.9	59771	39839.5	17379.3	7010.75	21949.9	25343.6	1033.04	26887.6	28279.6	8549.42	31287.2	7636.19	22477.5	38193.4	15166.9	23108.9	8595.71	6395.23	20583.6	3326.27	15660.4
645	tr|A0A087WTA8|A0A087WTA8_HUMAN.SLNNQIETLLTPEGSR.+2	886.463	41.19	tr|A0A087WTA8|A0A087WTA8_HUMAN	9554.19	35298.3	15415.5	18379	1839.09	32297.6	4898.84	430.827	23631	13292.2	56328.2	45883.5	58977.1	73973.7	12562.6	19462.1	4612.03	20748.2	50234.1	8331.65	33445.5	45905.3	22928.3	36136.5
646	tr|A0A087WTA8|A0A087WTA8_HUMAN.NSIAYMDEETGNLK.+2	792.864	33.38	tr|A0A087WTA8|A0A087WTA8_HUMAN	40386.3	40154.1	28849	34071.5	18721.4	14837.8	198.257	7972.85	12191.2	2055.96	22765.9	31029	9073.79	20437.7	1460.81	7537.84	11150.9	7174.74	3997.29	3597.63	5054.59	15106.7	236.428	4887.47
647	tr|A0A087WTA8|A0A087WTA8_HUMAN.GPSGPQGIR.+2	434.735	15.37	tr|A0A087WTA8|A0A087WTA8_HUMAN	8874.12	9040.47	11703.4	14276.5	5054.79	32935.8	22478	53885.8	4360.69	14551.6	6460.97	7298.3	9130.58	89384.9	4521.39	12217.6	18606	3185.8	10969.7	45984.6	5773.53	28480.2	2872.95	25577.8
648	tr|A0A087WTA8|A0A087WTA8_HUMAN.SLNNQIETLLTPEGSR.+3	591.311	39.58	tr|A0A087WTA8|A0A087WTA8_HUMAN	24335.3	35583.6	16296.6	20179.3	8105.31	34651.8	11835.9	33873.1	22442	16678.2	28464.6	54206.2	35786.9	44016	8701.56	17143.3	12147.4	10527.4	39880.6	14180.1	13979.8	26870.2	23271.9	11256.5
649	tr|A0A087WTA8|A0A087WTA8_HUMAN.LSHPEWSSGYYWIDPNQGC[CAM]TMDAIK.+3	985.774	50.59	tr|A0A087WTA8|A0A087WTA8_HUMAN	4348.93	13316.4	11137.9	4070.68	9535.99	4157.31	2963.54	4682.76	5544.71	3710.93	16676.7	35659.9	2777.46	4785.82	1878.94	6709.46	6048.88	2235.49	7879.92	1019.53	5130.66	4793.14	4912.11	8572.8
650	sp|Q02246|CNTN2_HUMAN.IIVQAQPEWLK.+2	662.885	41.62	sp|Q02246|CNTN2_HUMAN	55989.1	50078.7	56920.4	67091.4	56625.7	73765.1	42266	110477	98197.3	43436.5	93538.8	290034	86565.9	168841	55802.7	66831.1	121614	4287.98	138367	59256.9	99025	127946	65001	92646
651	sp|Q02246|CNTN2_HUMAN.VEVLAGDLR.+2	486.28	32.44	sp|Q02246|CNTN2_HUMAN	184025	163178	158379	187495	169990	239715	143121	353232	386088	88764.6	284703	868565	293633	555594	146003	187726	310417	160151	402434	170002	298702	337608	118846	204644
652	sp|Q02246|CNTN2_HUMAN.TTGPGGDGIPAEVHIVR.+3	559.297	33.41	sp|Q02246|CNTN2_HUMAN	33687.3	68787	39280.5	58693.9	41329.4	52362.4	14241.2	113755	66400.3	4200.28	1761.64	243853	79976.5	94131.9	2165.86	478.298	7117.57	3162.59	98095.6	897.251	68747.5	5222.05	45229.1	53199.4
653	sp|Q02246|CNTN2_HUMAN.GPPGPPGGVVVR.+2	544.814	27.22	sp|Q02246|CNTN2_HUMAN	22079.3	65290.3	45110.1	64540.2	51663.6	113835	71075.8	167892	181245	38274.3	139583	345512	122264	263197	69773.1	92550	198985	84911.2	187684	65746.5	102127	160393	47844.7	121154
654	sp|Q02246|CNTN2_HUMAN.VISDTEADIGSNLR.+2	745.378	32.66	sp|Q02246|CNTN2_HUMAN	26295.1	40699.9	31186	37783.7	36290.7	83016.7	57330.9	121296	128789	38706.2	102079	268828	113616	178088	35778.1	56232.4	90195.1	42529.4	108375	45020.8	99280	146393	39990.9	72769.7
655	sp|Q02246|CNTN2_HUMAN.VTVTPDGTLIIR.+2	642.88	40.27	sp|Q02246|CNTN2_HUMAN	114036	117340	116771	136524	105958	170816	7511.21	259208	279451	42777.7	207647	712214	168308	395591	82212	128494	186977	90083.6	261509	100635	232617	295306	98925.5	151969
656	sp|Q02246|CNTN2_HUMAN.VIASNILGTGEPSGPSSK.+2	857.455	35.39	sp|Q02246|CNTN2_HUMAN	65583.8	43906.6	46093.5	38559.1	31280.1	65599.5	48001.4	90393.8	91962.4	42860.8	80468	189709	100636	122869	20458.3	42630.2	74730.5	173.084	104816	30645.2	80171.3	111850	22643.9	46798.8
657	sp|Q02246|CNTN2_HUMAN.ETIGDLTILNAQLR.+2	778.936	50.19	sp|Q02246|CNTN2_HUMAN	12210.7	28326.8	16719.9	29885.4	19771.4	61395.8	33218	104054	107681	1770.7	86623.5	192380	89720.1	142532	35730.2	41817.9	1146.82	28079.4	129401	32649	82517.6	118150	31156.6	79616.9
658	sp|Q02246|CNTN2_HUMAN.WLLNEFPNFIPTDGR.+2	909.962	58.11	sp|Q02246|CNTN2_HUMAN	23953.4	23217.6	114.752	21952.9	19681.3	33585.3	9692.55	49808.1	49878.6	22574.6	25686	80594.6	28874.5	74765.9	11248.9	16030.3	0	3935.09	48135.8	2357.39	36121.3	33292.5	11909.2	9689.75
659	sp|P02749|APOH_HUMAN.EHSSLAFWK.+2	552.777	33.56	sp|P02749|APOH_HUMAN	43596.8	102893	33662.7	132246	47424.3	177183	28151.4	212832	142155	10774	75793.7	130971	264565	97962	25597.3	149461	160835	14311.4	107776	76681.9	123190	166910	72911.3	89306.4
660	sp|P02749|APOH_HUMAN.TC[CAM]PKPDDLPFSTVVPLK.+3	638.673	45.33	sp|P02749|APOH_HUMAN	90116.3	205384	159005	501372	119225	637822	55643.6	191320	125533	134356	64702.4	217075	244935	356970	44521.1	152800	7369.01	118142	364086	129584	117500	102597	130260	116493
661	sp|P02749|APOH_HUMAN.AGILENGAVR.+2	500.283	34.61	sp|P02749|APOH_HUMAN	14111.6	3820.59	10250.8	20204.4	4642.79	446398	14248.7	418594	17557.6	153845	100044	10341.8	22938.8	483186	39255.5	263966	410469	18260.2	252315	35034.9	40731.7	98106.4	97975.9	209709
662	sp|P02749|APOH_HUMAN.TFYEPGEEITYSC[CAM]KPGYV.+4	535.745	30.3	sp|P02749|APOH_HUMAN	51409.3	88987	59128.9	92456.2	44154.7	147149	4513	232427	81881.4	18310.8	69936	185029	256935	201554	1409.12	179709	3678.87	50789.1	193425	80108.9	67020.3	152404	142155	126705
663	sp|P02749|APOH_HUMAN.VC[CAM]PFAGILENGAVR.+2	751.893	56.61	sp|P02749|APOH_HUMAN	3230.58	2708.8	2028.19	3039.62	10070.1	97637	191565	65890.8	23926.8	29669	25922.9	2927.4	411282	67390.9	25018.2	130235	6825.89	7053.14	416004	4667.7	76954.5	58150.4	10194.8	17136.9
664	sp|P02749|APOH_HUMAN.TFYEPGEEITYSC[CAM]KPGYVSR.+3	795.035	46.08	sp|P02749|APOH_HUMAN	2714.39	1541.45	249.479	6733.57	3244.61	3358.75	897.278	6097.77	2103.76	35857.3	2493.79	16318.8	35841.4	8745.87	4595.77	9730.05	113635	8360.03	14395.3	2564.23	2520.71	27760.8	2645.15	1061.78
665	sp|P02749|APOH_HUMAN.FIC[CAM]PLTGLWPINTLK.+2	886.992	58.64	sp|P02749|APOH_HUMAN	21172.3	43320.5	43998.8	40360.6	1659.78	551302	102170	200554	91210.9	225123	45536.7	85499.2	301365	311271	36295.7	213563	0	2990.99	727531	20366.8	96287.8	95589.6	8934.89	61578.2
666	sp|P02749|APOH_HUMAN.ATFGC[CAM]HDGYSLDGPEEIEC[CAM]TK.+3	796.004	23.29	sp|P02749|APOH_HUMAN	972.704	5512.87	173.738	18045.3	2107.66	8290.46	7814.38	4705.95	7499.36	3472.23	2120.62	1265.59	11734.4	5627.32	1850.48	6731.56	23073	1068.99	5730.83	4101.5	1301.02	8736.49	716.03	5255.24
667	sp|P02749|APOH_HUMAN.TFYEPGEEITYSC[CAM]K.+2	862.38	36.33	sp|P02749|APOH_HUMAN	35469.6	80941.5	46990.6	162497	46189.9	164425	14445.8	58623.6	57571.6	10394	41279.1	40010.1	83580.2	79017.1	8927.26	48180.3	228135	15349.5	74813.9	26859.3	55728.5	8848	45587.6	25740
668	tr|A0A087X0S5|A0A087X0S5_HUMAN.VFSVAITPDHLEPR.+3	527.619	39.78	tr|A0A087X0S5|A0A087X0S5_HUMAN	106044	106691	79048.4	74141.3	103088	132673	15554.5	216197	227344	69127.2	255915	570403	223823	403589	65345.2	115855	237970	100778	240544	116721	212534	286361	176839	107708
669	tr|A0A087X0S5|A0A087X0S5_HUMAN.TAEYDVAYGESHLFR.+3	586.609	38.04	tr|A0A087X0S5|A0A087X0S5_HUMAN	6574.58	1790.16	1014.28	1276.24	13952.1	53254.1	12465	62556.3	74856.6	34751.4	134375	185057	107227	189762	23600	32627.2	119446	12912.9	109255	12878	112886	89824.4	44772.8	77903.2
670	tr|A0A087X0S5|A0A087X0S5_HUMAN.GLEQLLVGGSHLK.+3	450.93	42.47	tr|A0A087X0S5|A0A087X0S5_HUMAN	84610.9	111861	71202.9	62920.2	97427.6	123959	17307.6	220293	237101	59351.3	275477	573545	172821	477171	65987.6	105822	240150	117866	220207	110702	203048	266290	202550	149102
671	tr|A0A087X0S5|A0A087X0S5_HUMAN.VPSYQALLR.+2	523.803	46.49	tr|A0A087X0S5|A0A087X0S5_HUMAN	1262.58	5256.77	6371.9	2240.77	8271.41	53339.9	11022.5	42928.3	16688.6	46273.8	66075.3	38225.9	123998	129871	28767.4	38512.2	100636	8893.26	83668.8	3131.28	119843	55049.9	17773.4	35537.3
672	tr|A0A087X0S5|A0A087X0S5_HUMAN.ENYAELLEDAFLK.+2	777.888	58.36	tr|A0A087X0S5|A0A087X0S5_HUMAN	33269.6	34556.4	18938.8	20279.4	39768.5	50849.6	3787.03	110291	155970	3567.37	134497	254651	35984.2	172222	26059.9	43211.1	0	34338.4	44635.6	55112.9	114822	106561	81456.2	74137.2
673	tr|A0A087X0S5|A0A087X0S5_HUMAN.YLIVVTDGHPLEGYK.+3	568.638	39.71	tr|A0A087X0S5|A0A087X0S5_HUMAN	53104.5	52682.6	35912.1	42515	59969.8	43426	1429.07	95352.4	83948.7	9429.97	108050	341316	41771.7	195593	23228.5	30609.1	57919.5	3943.18	66058.9	53708.3	67119.9	84287.9	103199	62497.8
674	tr|A0A087X0S5|A0A087X0S5_HUMAN.LSIIATDHTYR.+3	430.567	23.58	tr|A0A087X0S5|A0A087X0S5_HUMAN	1282.46	10925.8	8387.54	12038.3	12670.6	41248.6	17080.2	84223.1	83146.3	33949.1	117646	159200	65784.5	153503	38345.7	42661.7	104247	46598	83538.2	29558.6	77562.5	80548.2	66723.3	57869.8
675	tr|A0A087X0S5|A0A087X0S5_HUMAN.LLLFSDGNSQGATPAAIEK.+2	966.507	45.1	tr|A0A087X0S5|A0A087X0S5_HUMAN	14681.3	13078.3	5236.85	10134.6	11205.8	30506.1	11194.7	53173.6	66411.6	732.32	64133.1	107246	26238.8	83106.6	8636.39	20913.8	2447.01	5663.72	30654.7	7889.55	47027.1	43071.3	24987.4	21362.8
676	tr|A0A087X0S5|A0A087X0S5_HUMAN.EPC[CAM]GGLEDAVNEAK.+2	744.835	33.14	tr|A0A087X0S5|A0A087X0S5_HUMAN	3022.68	965.765	37402.3	56428.8	45958.2	35034.1	1720.3	66260	75840.4	15378	70284.3	183373	17316.5	107574	14077.2	21504.9	4550.56	33465.7	21941.7	29820.5	41398.3	50079.8	13730.9	35549.8
677	tr|A0A087X0S5|A0A087X0S5_HUMAN.DAEEAISQTIDTIVDMIK.+2	996.496	64.17	tr|A0A087X0S5|A0A087X0S5_HUMAN	18069.7	9091.01	11074.2	7127.6	11763.2	16055.7	1402.22	18495.5	36616.4	4850.39	13674.3	67640.5	19761.8	48229.6	2527.64	4823.83	0	6938.77	9305.91	157.801	16231.1	16194	39525	11065.9
678	sp|P55058|PLTP_HUMAN.AVEPQLQEEER.+2	664.328	23.22	sp|P55058|PLTP_HUMAN	161193	69127.3	37059.3	81493.1	73919.9	260973	11338.6	401614	307518	139409	240726	292864	140514	290921	62311.9	107884	192561	47165.4	73563	55294.9	138653	227538	45054.5	34961.5
679	sp|P55058|PLTP_HUMAN.AGALQLLLVGDK.+2	599.364	49.39	sp|P55058|PLTP_HUMAN	91413.9	45462.7	21894.8	46247.4	36913	82069.8	1020.81	155050	109010	625.316	80031.9	343371	11549.4	107915	10917.3	14760.2	152.232	31046.9	12774.5	60681	1389.36	77241.2	23473.3	7793.32
680	sp|P55058|PLTP_HUMAN.ATYFGSIVLLSPAVIDSPLK.+2	1046.09	58.71	sp|P55058|PLTP_HUMAN	18849.5	12215.8	5381.5	11693	7259.14	79763.9	281.637	110514	45383.1	35336.5	76838.3	95256.3	56365.5	90732.6	12865.2	17525.5	0	10390.2	27831.1	12067.8	63058.2	118097	15876.6	13677.5
681	sp|P55058|PLTP_HUMAN.FLEQELETITIPDLR.+2	908.988	56.81	sp|P55058|PLTP_HUMAN	16023.7	24448.8	7600.92	13848.1	17394	85432.8	3494.35	128348	98937.4	47283.9	122611	124074	83283	139834	21506.7	32633.4	360.784	22642.6	69799.4	28681.3	70585.4	122772	1771.6	7501.59
682	sp|P55058|PLTP_HUMAN.DPVASTSNLDMDFR.+2	784.356	44.73	sp|P55058|PLTP_HUMAN	9309.84	14849.9	276.775	17970.7	5991.87	46632.6	7446.15	32284.4	49571.7	4172.2	116848	56399.1	18932.8	44528.8	9059.47	7259.39	41322.2	10239	24355.2	16595.2	39419.3	43823.3	11706.8	3565.38
683	sp|P55058|PLTP_HUMAN.SSVDELVGIDYSLMK.+2	828.413	51.38	sp|P55058|PLTP_HUMAN	52072.5	2011.02	2279.23	4883.69	4318.75	10311.6	5439.09	33732.7	49911.3	9630.11	79324	55823.1	9034.39	27428.6	1753.76	2707.92	5980.99	10506.9	28148.2	1718.98	8085.44	33525.6	36022.1	1645.85
684	sp|P55058|PLTP_HUMAN.VYDFLSTFITSGMR.+2	818.906	66.93	sp|P55058|PLTP_HUMAN	737.496	234.795	2295.45	1702.71	2844.86	43183.7	5479.09	29687.3	34267.1	12164.4	104924	43415.4	32796.4	46522.1	3759.94	6892.06	90.4218	3398.22	28380.5	2766.48	31886.2	44230.6	3583.06	883.59
685	sp|P55058|PLTP_HUMAN.GVQIPLPEGINFVHEVVTNH.+3	733.723	63.98	sp|P55058|PLTP_HUMAN	999.028	16430.3	12539.3	21886	13965.9	25826.7	14119.6	19585.8	25492.8	6232.95	11536.5	144377	7905.31	27781.1	3415.84	4390.71	328.851	3606.79	29218.3	15659.7	7326.76	7263.85	12668.3	5173.17
686	sp|P55058|PLTP_HUMAN.GVQIPLPEGINFVHEVVTNHAGFLTIGADLHFAK.+5	728.991	59.4	sp|P55058|PLTP_HUMAN	17738.8	3594.64	7804.68	1019.81	315.473	35110.8	5227.25	52055.2	2069.05	32613.1	2475.63	28373.8	66165	63422.7	2453.48	4220.22	0	1313.48	26011	5098.29	30201.2	55676.6	1375.06	23317.5
687	sp|P55058|PLTP_HUMAN.HAGTVLLNSLLDTVPVR.+3	602.347	52.71	sp|P55058|PLTP_HUMAN	10012.2	17079.5	7500.24	11230.8	7446.64	57884.2	1290.87	93898.1	122366	571.727	203696	155777	119608	225084	40418.7	43112.9	987.151	6655.05	5760.19	5327.68	118699	202814	15922.7	15717.4
688	sp|Q08380|LG3BP_HUMAN.SDLAVPSELALLK.+2	678.393	50.03	sp|Q08380|LG3BP_HUMAN	216936	293447	311171	373210	195243	405581	207987	618317	673358	369719	613845	1.05672e+06	1.3566e+06	1.23778e+06	371595	423278	658.132	109236	1.0444e+06	212889	988872	820798	482393	643664
689	sp|Q08380|LG3BP_HUMAN.ASHEEVEGLVEK.+3	442.889	22.73	sp|Q08380|LG3BP_HUMAN	244731	209494	254525	308886	215557	126552	131196	270928	294647	167269	216582	356479	399072	431275	226082	211622	235616	125923	280142	148656	314496	254769	275668	264445
690	sp|Q08380|LG3BP_HUMAN.YSSDYFQAPSDYR.+2	799.842	34.99	sp|Q08380|LG3BP_HUMAN	26475.4	53937.8	46921.8	69437.5	45087.4	113959	38552.5	126449	93284.1	53538.9	84949.1	169195	179327	187546	50077.9	64857.9	104639	38078.5	106439	59689.7	192528	154971	103517	101396
691	sp|Q08380|LG3BP_HUMAN.AVDTWSWGER.+2	603.78	37.22	sp|Q08380|LG3BP_HUMAN	148924	116140	174604	212523	128463	208400	196454	270115	178468	18415.2	157186	193279	417649	175184	26351.7	97961.2	149036	36669.7	361985	179002	154739	185600	103473	185331
692	sp|Q08380|LG3BP_HUMAN.ELSEALGQIFDSQR.+2	796.899	49.4	sp|Q08380|LG3BP_HUMAN	134847	194859	191069	238422	146925	285447	32492.8	422342	369091	163596	283211	691607	553920	745388	145578	195127	970.08	133061	323651	252889	445089	435680	365134	350291
693	sp|Q08380|LG3BP_HUMAN.YYPYQSFQTPQHPSFLFQDK.+3	841.066	46.24	sp|Q08380|LG3BP_HUMAN	16004.2	12244.7	19718.2	13284.8	781.469	36686.8	144069	50509.4	2023.51	24036.2	26115	20748.9	185763	54534.4	24117.8	42029.2	4766.24	3135.17	130785	20535.6	74913.7	80381.9	45845.7	16451
694	sp|Q08380|LG3BP_HUMAN.STHTLDLSR.+2	515.27	18.83	sp|Q08380|LG3BP_HUMAN	8512.27	25801	19707.1	26595.3	11115.2	28086.1	15683.1	43050.6	38490.2	6391.43	29077.4	52106.2	55029.2	59117.8	22411.8	18485.9	61910.9	4379.57	35312.2	24677.3	39933.3	41095.9	37036.7	38261.5
695	sp|Q08380|LG3BP_HUMAN.TLQALEFHTVPF.+2	701.872	52.18	sp|Q08380|LG3BP_HUMAN	64394	12459	65751	78942.9	42136.5	37082.5	2426.13	73912.5	105300	6861.86	90927.9	13908	117715	193661	62263.1	4341.3	448.66	6657.87	80223.5	6237.94	148558	131757	50799.3	832.496
696	sp|Q08380|LG3BP_HUMAN.SQLVYQSR.+2	490.762	19.21	sp|Q08380|LG3BP_HUMAN	71550.7	128370	96114.4	150621	99729	207265	91784.4	306113	209626	68282.3	129737	253580	153147	268007	92922.7	162857	229575	63051.7	139937	95209	135333	103116	106892	150175
697	sp|P61769|B2MG_HUMAN.VEHSDLSFSK.+2	574.783	20.91	sp|P61769|B2MG_HUMAN	309153	336667	325010	337808	277514	380976	118948	440088	359746	90224.1	498551	519701	353982	556602	67392.3	488016	572810	66132.5	302556	92463.5	233261	211315	268845	244677
698	sp|P61769|B2MG_HUMAN.VNHVTLSQPK.+2	561.817	16.97	sp|P61769|B2MG_HUMAN	1.18601e+06	869410	746074	1.17357e+06	989933	278991	176952	373967	361937	121735	246197	571550	144893	429553	67595.9	257871	390057	174586	253304	188337	96916.3	103816	341497	295214
699	sp|P61769|B2MG_HUMAN.LLYYTEFTPTEK.+2	752.882	42.26	sp|P61769|B2MG_HUMAN	1.44857e+06	1.34513e+06	1.3948e+06	1.43013e+06	1.14276e+06	337285	2768.81	407753	1.11345e+06	12350.2	1.21718e+06	1.6434e+06	422240	4.20652e+06	638154	943796	497624	152759	366599	124214	1.29634e+06	1.26417e+06	1.22567e+06	372405
700	sp|P61769|B2MG_HUMAN.VSGFHPSDIEVDLLK.+3	552.626	45.19	sp|P61769|B2MG_HUMAN	390221	418582	498027	754070	540902	256752	3301.41	238605	337693	12151	344165	1.74731e+06	100795	1.04037e+06	4194.5	90325.5	228559	677262	74782.2	509160	181190	185453	661652	305757
701	sp|P61769|B2MG_HUMAN.SNFLNC[CAM]YVSGFHPSDIEVDLLK.+3	852.081	56.36	sp|P61769|B2MG_HUMAN	77166.8	103844	113365	116564	50327.9	201823	27895.2	129803	99548.7	22562.7	95925.3	266842	87117.6	274751	25250.3	38530.5	292.522	36694.5	93398.9	38966.3	92435.6	50687.5	73632.3	103299
702	sp|P61769|B2MG_HUMAN.NHVTLSQPK.+2	512.283	18.89	sp|P61769|B2MG_HUMAN	19197.9	63194.7	113347	71074.8	31242.7	36899.7	27793.6	56687.2	48810.3	18780	44605.3	85074	16254.2	57109.1	5084.99	36998.1	56357.6	27134.5	24561.2	26380.7	11348.6	15292.7	53793.3	46563.2
703	sp|P61769|B2MG_HUMAN.YYTEFTPTEK.+2	639.798	29.77	sp|P61769|B2MG_HUMAN	194479	185094	152386	183920	194815	322522	25471.6	265039	154370	3415.76	238757	323968	80688	439040	46368.1	349658	168883	45901.9	97957.3	62309.2	171500	151851	156077	117891
704	sp|P61769|B2MG_HUMAN.EHSDLSFSK.+2	525.249	20.91	sp|P61769|B2MG_HUMAN	43987.9	48810.8	51351.3	48523.5	36314.2	37602.7	6365.17	53392	49077.7	11685	29783.4	65508.9	36775.5	71754	1931.56	13074.6	24463.3	9848.53	41195.4	19182.3	28615.7	56752.5	2886.42	30229.1
705	sp|P61769|B2MG_HUMAN.VSGFHPSDIEVDLL.+2	764.388	51.75	sp|P61769|B2MG_HUMAN	246412	116809	158972	199030	169954	28035.5	3181.83	28095.7	72463	3432.49	5448.98	184453	2916.82	20604.7	3348.6	12576.5	1520.95	42013.1	4118.48	108578	4109.51	2920.18	128536	4562.03
706	sp|P61769|B2MG_HUMAN.SGFHPSDIEVDLLK.+3	519.603	44.22	sp|P61769|B2MG_HUMAN	10964.4	21547.6	6046.43	16811.1	14762	5881.09	3738.73	3327.56	326.038	4773.37	3544.22	620.866	6286.2	528.462	4324.4	3651.65	12138.7	2643.67	5644.72	1421.91	936.666	18532.9	3543.74	3995.43
707	sp|Q7Z7M0|MEGF8_HUMAN.FLDTGVVQSDR.+2	618.815	30.88	sp|Q7Z7M0|MEGF8_HUMAN	108109	123213	65118.4	68774.7	97925.3	72060.9	39914.2	93621.1	165389	29033.5	162955	309575	150356	191879	48375.2	68651.9	97253.9	41118.4	76830.8	70243.4	97375.5	155446	58826.7	76101.1
708	sp|Q7Z7M0|MEGF8_HUMAN.GPLLASLSGSTRPPPIEASSGK.+3	708.055	39.3	sp|Q7Z7M0|MEGF8_HUMAN	49166.1	64707.1	30006.6	30609.4	35546.9	63714.7	292.233	66557.1	87834.7	30004.4	123434	188879	104718	127189	26714.9	42680.5	88267.2	1930.72	77333.7	26735.8	67906.7	136695	35666	56092.7
709	sp|Q7Z7M0|MEGF8_HUMAN.HVWTTLK.+2	442.753	22.02	sp|Q7Z7M0|MEGF8_HUMAN	13251.4	7024.62	10889.1	8409.02	12203.6	14310.1	4180.16	16548.4	17414.9	3767.28	4283.98	10870.5	12544.5	10880.2	1467.37	4285.09	33669.9	4588.58	19213.4	7087.24	16126.3	35893.1	10653.8	7933.49
710	sp|Q7Z7M0|MEGF8_HUMAN.LDSTSGGYWEQVIPAGGRPPAATGH.+3	842.079	42.24	sp|Q7Z7M0|MEGF8_HUMAN	22277.1	27597.2	1653.28	23567.9	4793.44	34740.5	9928.83	185897	121499	137431	81959.6	6089.23	39416.8	136685	5034.85	131412	182515	862.107	12965.2	4035.3	6379.39	72849	21173.6	45160.9
711	sp|Q7Z7M0|MEGF8_HUMAN.TWSLLAPSQGAK.+2	629.843	40.08	sp|Q7Z7M0|MEGF8_HUMAN	56202.8	68486.7	31570	37952.8	53125.6	26739.4	5071.76	54950.3	98389.8	14534.3	90375.5	157913	84218.2	67200.5	14534	17745.6	157550	76424.2	55901.5	93245	41777.2	80844.8	81108.6	131914
712	sp|Q7Z7M0|MEGF8_HUMAN.SFHAAAYVPAGR.+3	416.216	25.87	sp|Q7Z7M0|MEGF8_HUMAN	20263.5	38579.4	15289.3	23622.8	30092	43345	21029.7	60702.5	73386.6	13227.9	69566.6	102586	60349.6	76368.5	31291	38490.2	51680.5	8978.92	49182.7	20338.8	36807.6	61878.4	17603.3	34564.3
713	sp|Q7Z7M0|MEGF8_HUMAN.APQTVELPAVAGHTLTAR.+3	611.339	45.4	sp|Q7Z7M0|MEGF8_HUMAN	27909.2	2169.35	2789.19	2848.93	4293.75	16105.9	7806.03	3598.14	22854.6	12719.1	1060.72	5137.36	57026	14785.8	478.999	14919.2	17468.3	3254.26	1872.6	5586.11	4166.93	19413.5	2963.19	19892.9
714	sp|Q7Z7M0|MEGF8_HUMAN.LFPLPGR.+2	400.245	37.83	sp|Q7Z7M0|MEGF8_HUMAN	66877.1	124916	54854.4	83564.2	110610	159028	103590	194434	237626	65701.3	296167	542272	319721	378864	98933.1	149839	233909	119434	307067	172738	187615	323885	102030	162397
715	sp|Q7Z7M0|MEGF8_HUMAN.WTQMLAGAEDGGPGPSPR.+2	913.928	35.89	sp|Q7Z7M0|MEGF8_HUMAN	17677.8	18435.8	7420.24	9301.83	15117	12847	11830.6	5117.64	17401.6	9842.77	22736.9	35430.5	11017.9	4777.2	3332.73	12965.5	2109.48	5502.59	9186.15	4224.45	2737.61	12760.9	8174.92	9882.6
716	sp|P19021-6|AMD_HUMAN.IPVDEEAFVIDFKPR.+3	592.317	47.41	sp|P19021-6|AMD_HUMAN	40416.3	34247.8	24440.6	26790.2	36988.1	59405.8	29616.3	30569.2	40366.1	29066.8	71852.9	169752	83449.4	129873	38321.3	44017	525.273	10671.6	91093.2	23003.2	45013.8	96551.2	35775.6	59456.5
717	sp|P19021-6|AMD_HUMAN.IVQFSPSGK.+2	481.769	25.25	sp|P19021-6|AMD_HUMAN	60884.5	60627.3	33893.8	53784.6	65396.9	82827.1	88689.1	87189.3	148493	48684.5	166207	287607	135375	131605	47851.5	99425	192509	55853.1	135350	96562.8	66668	139289	44476.2	81524.4
718	sp|P19021-6|AMD_HUMAN.IPLLQQPK.+2	468.798	29.27	sp|P19021-6|AMD_HUMAN	4784.65	25062.7	17313.2	21402.5	2640.8	25917.3	15221.6	5554.66	35294	65062.8	23734.6	110658	38644.3	72787.4	1880.08	13925.2	33742.4	2347.76	6948.4	832.891	28796.4	52301.1	14439.1	13955.2
719	sp|P19021-6|AMD_HUMAN.PVVPIDSSDFALDIR.+2	822.436	51.91	sp|P19021-6|AMD_HUMAN	33766.7	35435.1	4630.42	42705.8	43945.9	54713.7	1213.58	71257.3	121248	7199.77	115491	314463	32217.3	117364	19398	34192.7	1227.54	38657.9	44380.5	1091.93	1457.23	82615.3	50390.5	59189.6
720	sp|P19021-6|AMD_HUMAN.EGPVLILGR.+2	477.293	38.56	sp|P19021-6|AMD_HUMAN	25288.6	74955.6	21783	48658	1307.89	55967.9	20271	74614	131226	72894.7	130388	572475	145556	138354	37661.4	88878	169764	123458	68030.5	15075	41933.4	106385	53214.6	77489.2
721	sp|P19021-6|AMD_HUMAN.AGIEVQEIK.+2	493.779	28.18	sp|P19021-6|AMD_HUMAN	55682	53399.6	31933.3	53842.8	62750.7	18262.1	16939.3	28051.2	23859.8	34979.9	55806.2	130819	6059.6	22959.8	993.569	37857.7	31623.1	37267.1	19031.2	50801.5	100980	132533	23584.5	12631.1
722	sp|P19021-6|AMD_HUMAN.PHFGDQEPVQGF.+2	679.312	28.57	sp|P19021-6|AMD_HUMAN	31897	7825.07	9837.46	18068.3	19771.2	9690.6	24738.7	16627.3	28154.3	3776.25	19745.5	109130	33638.1	32306.7	6528.92	11526.7	10303.6	7049.69	31610.8	16384.1	22043.4	11902.8	37590.9	14945.1
723	sp|P19021-6|AMD_HUMAN.SVDTVIPAGEK.+2	558.301	26.14	sp|P19021-6|AMD_HUMAN	45877.4	35854.7	15519.2	29021.4	33867.3	34057.6	6136.05	41131.7	54873.6	20584.6	45532.3	108812	3366.59	56726.9	13937.5	24621.9	28104.8	25759.1	12703	13323.4	25619.5	43728.7	22534.6	28553.5
724	sp|P19021-6|AMD_HUMAN.GDHVWDGNSFDSK.+2	732.313	27.41	sp|P19021-6|AMD_HUMAN	9071.6	1449.26	229.761	1291.03	7050.22	14428	9193.77	16565.3	11265.2	7552.01	14770	29977.1	742.531	16359.8	761.063	7674.92	14056.3	4381.9	6786.94	11984.3	292.443	10098.4	6100.63	5945.11
725	sp|P08185|CBG_HUMAN.HLVALSPK.+2	432.769	20.78	sp|P08185|CBG_HUMAN	106484	202002	66883.7	127135	99279.1	93995.5	7107.82	163441	76041	58729.4	57765.1	86094.1	179144	334306	23905.5	72489.6	72211	12745.2	57949.1	32051.7	63163.4	85681.8	162216	102569
726	sp|P08185|CBG_HUMAN.EENFYVDETTVVK.+2	786.875	37.1	sp|P08185|CBG_HUMAN	123187	292556	97532.3	190796	144683	304990	18284.2	404614	157052	80940	118178	304127	578815	1.09169e+06	71416.9	156360	173605	78290.6	206703	169368	235413	343516	424503	272699
727	sp|P08185|CBG_HUMAN.WSAGLTSSQVDLYIPK.+2	882.962	48.31	sp|P08185|CBG_HUMAN	47211.7	88442.1	26950	50383.1	41842.2	105025	8121.83	112839	59533	58938.7	37083.7	87657.5	185830	352893	8574.03	38009.6	485.238	17170.3	79302.9	56274.9	48420.4	72231.5	197396	109446
728	sp|P08185|CBG_HUMAN.GTWTQPFDLASTR.+2	740.365	48.56	sp|P08185|CBG_HUMAN	8120.77	775.257	55553.2	104299	69265.1	378779	7527.86	473523	183861	199920	157289	268885	827798	1.30775e+06	80057.2	205406	162120	34403.2	178391	86519.9	260368	440974	282767	324133
729	sp|P08185|CBG_HUMAN.SETEIHQGFQHLHQLFAK.+4	538.275	51.91	sp|P08185|CBG_HUMAN	357.514	64074.2	22774.7	34016.1	23287.9	81284.2	27409.7	85555.4	2818.61	7983.37	23109.1	98463.5	241285	239056	12932	60720.6	5162.28	5559.28	108804	28720	61098.4	64664.2	31517	61009.6
730	sp|P08185|CBG_HUMAN.HYYESEVLAMNFQDWATASR.+3	806.699	52.77	sp|P08185|CBG_HUMAN	6430.19	36141.9	17330	98557.3	20087.4	26228.3	5613.33	75959.2	7297.22	4465.06	16396.1	44797.3	133610	193211	6056.39	3411.56	788.6	1319.62	4585.98	62752.8	39647.4	56785.9	48787.5	31488.1
731	sp|P08185|CBG_HUMAN.IVDLFSGLDSPAILVLVNYIFFK.+3	861.821	66.26	sp|P08185|CBG_HUMAN	3705.84	145.038	127.797	918.853	3519.09	10373.2	6759.67	12329.7	3381.63	5063.48	2419.66	7969.77	13385.9	51180.8	3755.39	744.457	0	5201.14	6211.09	3083.38	1367.51	2678.85	93131.5	40071.8
732	tr|V9GYM3|V9GYM3_HUMAN.SPELQAEAK.+2	486.753	16.5	tr|V9GYM3|V9GYM3_HUMAN	566460	549343	375812	923906	294126	371597	59044.8	313109	175493	255078	88194.5	81095.1	146355	188608	71169.7	454350	359746	62400.5	312913	155126	76061.9	128141	233671	230908
733	tr|V9GYM3|V9GYM3_HUMAN.EPC[CAM]VESLVSQYFQTVTDYGK.+2	1175.55	58.86	tr|V9GYM3|V9GYM3_HUMAN	147862	179532	112397	197383	50598.5	537969	37770.4	374353	137678	136602	63521.6	73718.7	200552	115407	29145.9	42972.7	0	18516.3	307238	114849	74102	160756	74165	144583
734	tr|V9GYM3|V9GYM3_HUMAN.AGTELVNFLSYFVELGTQPATQ.+3	795.737	63.6	tr|V9GYM3|V9GYM3_HUMAN	15742.5	9777.54	7699.06	11761.4	6897.68	16860.1	5566.72	6103.04	7439.74	18459.7	3175.08	10483.8	12241.1	1701.89	18738.2	9839.92	0	5155.09	6392.32	7678.44	4905.99	8820.68	6221.37	9462.19
735	tr|V9GYM3|V9GYM3_HUMAN.SKEQLTPLIK.+2	578.851	27.04	tr|V9GYM3|V9GYM3_HUMAN	13862.5	18505.7	8505.26	9317.64	425.04	88705.8	14019.1	65652.9	8666.06	146949	2340.5	7764.31	94921.2	18228.8	466.139	57865.7	109458	3692.56	100822	2321.4	409.466	4978.83	6193.62	212.709
736	tr|V9GYM3|V9GYM3_HUMAN.VKSPELQAEAK.+3	400.559	15.81	tr|V9GYM3|V9GYM3_HUMAN	2849.89	1808.52	1292.87	2040.2	1814.58	11351.7	5862.84	6321.4	8216.23	69347	6977.58	5186.1	19837.4	4578.86	11423.8	6278.67	56693.1	7273.92	7168.75	4326.79	12506.7	16488.6	4505.07	428.771
737	tr|V9GYM3|V9GYM3_HUMAN.AGTELVNFLSYF.+2	680.843	59.28	tr|V9GYM3|V9GYM3_HUMAN	2817.51	4322.82	3610.73	241.941	135.848	46397.1	324.225	59019	7944.47	19048.5	4136.65	37935.5	156.941	32770.4	347.187	36062.3	0	223.348	8262.61	34081.2	12532.2	8493.6	344.884	32378.8
738	tr|V9GYM3|V9GYM3_HUMAN.AGTELVNFLSYFVELGTQPAT.+3	753.051	63.76	tr|V9GYM3|V9GYM3_HUMAN	20454.2	7351.36	7999.58	378.707	3779.24	2586.73	4186.04	658.632	7637.36	4803.36	135.595	8623.55	5853.39	14938.9	2582.55	2029.22	0	3066.94	9361.15	6772.19	3551.99	4566	560.503	322.608
739	tr|V9GYM3|V9GYM3_HUMAN.VSQYFQTVTDYGK.+2	768.372	36.69	tr|V9GYM3|V9GYM3_HUMAN	42035.3	48575.8	28175.1	75750.5	31665.3	30778.4	1701.01	35068.5	22247.8	25369.2	5238.31	40292.9	15011.1	32204.7	2175.75	171.407	1532.05	24769.6	7800.2	91336.1	22978	9611.06	46429.6	28141
740	tr|V9GYM3|V9GYM3_HUMAN.KAGTELVNFLSYFVELGTQPATQ.+3	838.436	62.63	tr|V9GYM3|V9GYM3_HUMAN	2047.27	5167.73	3507.69	3128.16	1709.5	24339.6	340.151	8352.7	2497.57	16268.5	14280.3	18147.6	38657	13938.4	209.732	5598.64	0	1712.7	19653	5263.64	5850.66	19292	23258.6	4902.79
741	sp|P01031|CO5_HUMAN.IPLDLVPK.+2	447.787	40.44	sp|P01031|CO5_HUMAN	9605.53	8105.61	2240.36	15791.8	6427.21	52492.4	568.764	27403.8	4374.88	786.846	11148.3	8091.45	90994.3	60954.3	9565.03	41534.6	52796.5	5963.92	10310.7	19094.7	24017.6	63966.1	26202.6	8255.84
742	sp|P01031|CO5_HUMAN.LQGTLPVEAR.+2	542.312	30.06	sp|P01031|CO5_HUMAN	1562.7	57724.2	12622.1	3770.09	22006.6	246814	8757.31	152924	43967.1	45977.3	28452.9	39422.8	91699.8	131307	20800.7	74189.8	90508.6	4204.09	60935.1	40444.2	34800.2	191781	50800.2	67307.5
743	sp|P01031|CO5_HUMAN.ESYSGVTLDPR.+2	612.299	27.59	sp|P01031|CO5_HUMAN	6378.01	4159.78	20100.3	18583.3	10098.1	40832.3	14472.6	46985.9	20215.1	15666.4	25270.4	19298.9	43748	35552.9	12603.1	14710.8	4868.17	10830	46397.3	38387.8	22004.3	65427.6	17624.5	11704.3
744	sp|P01031|CO5_HUMAN.VYSLNDDLKPAK.+3	454.914	27.86	sp|P01031|CO5_HUMAN	12551.1	329.832	812.842	17851.4	8972.35	28272.4	1897.26	43848.7	1864.5	13831.9	948.028	20010.2	33348.5	46447.4	9909	20253.8	4701.34	3431.6	55817.9	5426.09	2712.18	63890.5	2315.33	22305.2
745	sp|P01031|CO5_HUMAN.FLKPGIPYPIK.+3	424.929	31.45	sp|P01031|CO5_HUMAN	2773.7	5490.87	1807.27	9009.99	1817.26	22116.1	7779.93	38745.8	14253.4	19822.2	14340.6	30571.7	33065.2	66207.4	7650.39	28594.6	30555.8	9874.75	22010.8	15103	22271.1	102428	28605.1	29725.7
746	sp|P01031|CO5_HUMAN.FQNSAILTIQPK.+2	680.385	37.72	sp|P01031|CO5_HUMAN	9570.55	8526.61	2905.21	10587.9	694.886	33710.6	701.516	28010.9	5302.94	1320.92	6455.1	22179.3	1638.4	25884.6	330.237	8824.78	1017.55	6327.99	3093.66	6031.57	9253.63	23665.4	3699.77	2612.29
747	sp|P01031|CO5_HUMAN.GLLVGEILSAVLSQEGINILTHLPK.+3	872.177	63.24	sp|P01031|CO5_HUMAN	4381.97	374.46	3636.17	1236.7	7334.53	21770.7	1427.9	25374.6	129.621	5036.42	8903.07	20992.6	8536.07	23404.1	538.599	1290.67	0	2065.84	10309.1	310.357	2094.87	24310.6	1383.2	4262.1
748	sp|P01031|CO5_HUMAN.LNLVATPLFLKPGIPYPIK.+3	698.762	56.74	sp|P01031|CO5_HUMAN	1794.12	483.498	2894.97	158.874	213.541	34883.8	551.057	33369.7	906.048	37439.6	1983.3	147.869	95.5034	733.639	271.093	7687.78	90.4218	494.358	33986.8	186.166	2445.52	15318.3	246.592	6262.64
749	sp|P01031|CO5_HUMAN.TDAPDLPEENQAR.+2	728.339	24.99	sp|P01031|CO5_HUMAN	15781.6	6518.76	7170.17	24231.5	8519.4	62512.5	5707.61	83818.6	23722.7	28844.9	2001.7	5012.91	6158.97	54748.2	1822.54	30014.4	34285.5	7838.06	29237.5	15481.2	11340.5	62345.6	18879.1	29444.4
750	tr|H9KV31|H9KV31_HUMAN.IEIFQTLPVR.+2	608.359	46.96	tr|H9KV31|H9KV31_HUMAN	55921.4	71049.6	62479	83303.5	76411.7	268304	38559.9	255919	297164	85534	379622	526154	328580	390741	100538	172868	17429.2	146293	282166	150939	309156	388111	112069	188592
751	tr|H9KV31|H9KV31_HUMAN.AVDGFTFTEGDK.+2	643.799	36.08	tr|H9KV31|H9KV31_HUMAN	107622	65914.2	64728.1	90177.5	91258	146588	104212	141555	179364	36603.1	97122.3	385435	171833	261344	51106.6	84774.3	152664	73808.8	165813	86750.3	215784	239126	71858	98673
752	tr|H9KV31|H9KV31_HUMAN.IIELSQTTAK.+2	552.319	26.79	tr|H9KV31|H9KV31_HUMAN	163243	103822	92719.1	123366	126037	214128	40818.4	205132	252378	82847.4	247685	453575	185330	272866	66242.9	142746	246070	79347.8	145545	107116	187264	246597	91184.1	117583
753	tr|H9KV31|H9KV31_HUMAN.EVVSPQEFK.+2	531.777	27.9	tr|H9KV31|H9KV31_HUMAN	167192	109566	116363	148630	163189	193957	6355.25	233791	272378	49079.4	250375	462947	201040	298943	74611.6	147189	220132	114598	125593	127669	187966	280118	116395	151713
754	tr|H9KV31|H9KV31_HUMAN.MILEIAPTSDNDFGR.+2	839.909	45.28	tr|H9KV31|H9KV31_HUMAN	98609	73620.2	76576.9	93073.6	80624.2	84184.9	13596.9	69544.5	153460	12198.1	144260	320618	52945	172974	15603.9	32770.4	88527	57178.1	53563.3	70306.2	82778.6	122453	76069.7	65643.9
755	tr|H9KV31|H9KV31_HUMAN.GSNTELTVR.+2	488.757	18.98	tr|H9KV31|H9KV31_HUMAN	49326.6	51549.1	23434.4	64881.9	54219.6	52588.7	40738.8	81533.6	96472.9	33996.7	79427.2	116366	50518.2	70028.8	27853.7	44973.2	79863.1	35768.1	49743.7	27128.1	46827.6	37318.8	35149	54293
756	tr|H9KV31|H9KV31_HUMAN.LTIYNANIEDAGIYR.+2	863.444	43.76	tr|H9KV31|H9KV31_HUMAN	62706.2	6910.59	12318.1	33771.3	6509.91	263963	10955.9	216190	205002	34619.8	229437	71951.6	18326.9	204335	32814.7	47688.3	75996.4	14959.9	34822.5	35711.3	167850	173687	811.121	57878.2
757	tr|H9KV31|H9KV31_HUMAN.VSSSPAPAVSWLYHNEEVTTISDNR.+3	920.447	45.99	tr|H9KV31|H9KV31_HUMAN	16931.1	1852.54	10843.3	607.344	14318.1	25762.2	2926.62	32685.4	31323.3	12927.8	44781.2	56558.4	49881.9	22313.2	3179.22	12930	4794.11	2748.15	27904.7	1971.29	31572.3	53686.4	3609.48	24071.1
758	tr|H9KV31|H9KV31_HUMAN.SMYLDIEYAPK.+2	665.323	42.17	tr|H9KV31|H9KV31_HUMAN	65291.9	41116.6	42538.9	52892.4	1812.98	47558.7	11529.5	4232.97	76194.7	131871	104426	185998	110764	14272.5	8617.53	26938.2	27220.6	8249.74	48025.1	40347.5	69794.6	45034.2	50855.2	41043
759	tr|H9KV31|H9KV31_HUMAN.ILALADVPSSPYGVK.+2	765.432	44.86	tr|H9KV31|H9KV31_HUMAN	57009.5	42863.7	33347.3	69254.7	68706.2	23492.7	2096.72	32275.2	81961.4	5145.69	96285.2	275010	6062.33	87145.6	13326.2	4965.17	7800.12	59330.2	628.263	60321.8	36805	48772.6	80403.3	62231.7
760	sp|Q12805-2|FBLN3_HUMAN.DIDEC[CAM]DIVPDAC[CAM]K.+2	775.329	34.95	sp|Q12805-2|FBLN3_HUMAN	13857.1	2878.29	9526.13	11518.9	14665.7	196702	45367.9	163468	103746	43141.1	51027.2	160555	56565.1	96280.6	13204.2	87019.3	147197	53398.3	76142.5	53578.1	78497	138276	3268.16	28576.5
761	sp|Q12805-2|FBLN3_HUMAN.ADQVC[CAM]INLR.+2	544.779	26.63	sp|Q12805-2|FBLN3_HUMAN	5207.55	22068.3	9770.33	17105.8	5952.3	586228	48855.8	305030	191171	169487	10302.1	889.411	109609	130441	28038.7	288487	501876	55296.9	121502	40718.5	171792	329640	38082.4	36275.8
762	sp|Q12805-2|FBLN3_HUMAN.SGNENGEFYLR.+2	643.294	39.45	sp|Q12805-2|FBLN3_HUMAN	6501.71	5302.26	4033.91	2174.11	17879.4	145524	3105.75	203462	117811	47877.6	3899.86	354851	9366.18	168731	7135.01	68959	357.412	107115	95980.4	90617.6	8165.44	70242.8	62413.3	31154.9
763	sp|Q12805-2|FBLN3_HUMAN.IQC[CAM]AAGYEQSEHNVC[CAM]QDIDEC[CAM]TAGTHNC[CAM]R.+4	856.601	36.88	sp|Q12805-2|FBLN3_HUMAN	3740	1704.55	4008.14	7350.93	2755.54	149235	9289.09	80631.1	26577.4	28424.3	4763.69	21600.6	13248.8	10700.2	1681.26	40337.2	84659.3	2466.83	13901.4	3243.8	17087.1	53933.1	2011.76	3281.66
764	sp|Q12805-2|FBLN3_HUMAN.SVPSDIFQIQATTIYANTINTFR.+3	867.45	65.51	sp|Q12805-2|FBLN3_HUMAN	1457.31	10930.6	367.153	135.498	2092.33	68554.1	34299.5	50939.1	2607.32	96585.4	15061.4	15036.2	147053	4259.52	3110.29	33725	0	5797.12	78741.5	2702.23	28916.7	48487.1	551.375	3330.12
765	sp|Q12805-2|FBLN3_HUMAN.NPC[CAM]QDPYILTPENR.+2	858.904	29.43	sp|Q12805-2|FBLN3_HUMAN	5821.91	2116.01	2515.85	2734.42	3593.08	52391.1	14192.3	2103.18	3283.89	42318.6	3245.1	7594.76	29917.9	8635.69	264.51	8529.94	27667.8	3727.58	5368.31	8425.14	10000.9	31464.6	468.147	4279.82
766	sp|Q12805-2|FBLN3_HUMAN.LNC[CAM]EDIDEC[CAM]R.+2	662.269	22.62	sp|Q12805-2|FBLN3_HUMAN	51466.9	29149.1	15911.4	38431.1	40782.6	210891	64386.2	239482	133562	22986.3	84131.9	252972	85508.1	168768	19121.2	177441	299178	83819.8	125586	61253.1	78854.6	137096	4721.17	40798.2
767	sp|Q12805-2|FBLN3_HUMAN.EHIVDLEMLTVSSIGTFR.+3	683.023	55.81	sp|Q12805-2|FBLN3_HUMAN	13837	30600.1	272.958	25394.4	17202.6	63148.6	8159.86	70506.4	3904.67	19471.4	84430.8	232359	81186.4	298089	2224.16	32839.2	1131.47	21274.2	25410.9	4913.25	31712.9	52229.6	85305.7	7990.06
768	sp|Q12805-2|FBLN3_HUMAN.GSFAC[CAM]QC[CAM]PPGYQK.+2	750.324	23.98	sp|Q12805-2|FBLN3_HUMAN	4090.63	2904.47	3537.65	2356.41	1381.7	94680.8	7564.8	55930.5	39407.7	22263.2	10308.1	10391.5	8274.71	15123.8	2587.9	35542	59270.8	2028.43	9404.08	4266.26	14543.6	29440.1	5727.29	316.995
769	sp|P78509-2|RELN_HUMAN.IISVELPGDAK.+2	571.327	38.12	sp|P78509-2|RELN_HUMAN	56263.8	94168.8	6198.59	5945.64	84879.1	69790.7	27533.4	224488	286403	177176	230648	479852	3100.98	275710	53417.7	70097	51323	12825.1	80098	81032.1	35371.5	144229	74396.9	79142.8
770	sp|P78509-2|RELN_HUMAN.FVYLELPAAAK.+2	611.347	45.73	sp|P78509-2|RELN_HUMAN	28307.2	59458.5	16577.6	31794.3	67887	62665.2	29370.5	216643	225802	97927	279744	339827	132092	211864	68706.7	81571.2	2106.04	51212.5	203261	56489.5	47749.6	106053	45117.5	82571.7
771	sp|P78509-2|RELN_HUMAN.ITIQLPDHVSSSATQFR.+3	634.002	50.07	sp|P78509-2|RELN_HUMAN	1563.39	24435.3	850.461	12593.2	12377.6	50345.5	8796.25	101862	90414.5	7167.82	155551	229168	90052.1	144238	33932.8	45240.9	90323.3	27658.5	111629	27913	40204	51929	51745.3	40313.5
772	sp|P78509-2|RELN_HUMAN.ITYPLPESLVGNPVR.+2	827.962	47.62	sp|P78509-2|RELN_HUMAN	8389.34	36806.3	1332.47	5391.97	2716.43	37342.8	1086.12	122588	2611.81	22966.3	172597	205965	70344.5	145884	30360.7	52120.6	3759.05	52060	135370	41275.6	33752	75005.9	492.508	51779.1
773	sp|P78509-2|RELN_HUMAN.VPSLVSVVINPELQTPATK.+2	996.572	52.68	sp|P78509-2|RELN_HUMAN	7914.86	10650.9	3182.99	6664.18	12189.8	12416.7	1094.07	55542.2	57878	13602.5	59980.9	89710.6	27178.3	59365.6	9778.34	11150.3	344.99	1595.3	29570.3	8844.39	9700.69	30077.8	1361.11	22312.8
774	sp|P78509-2|RELN_HUMAN.LAEIHSDSIILR.+3	456.261	22.24	sp|P78509-2|RELN_HUMAN	893.538	30627.2	9596.15	17267.4	20473.5	33145.9	4611.37	110950	77890	23362	67614.4	219888	3465.42	121988	18408.8	12918.9	58259.2	1311.26	32155	26750.5	27125.2	50305.7	25000.5	38194.9
775	sp|P78509-2|RELN_HUMAN.GENVQFQWK.+2	568.28	33.7	sp|P78509-2|RELN_HUMAN	16664.5	25330.3	19832.2	13150.8	20172	23573.2	17697.4	117012	100172	39331.8	6759.16	125400	12021	123525	58353.4	9518.66	14897.5	10677.3	181977	19491.7	46048.2	13989	12056.1	41186.5
776	sp|P02671-2|FIBA_HUMAN.GSESGIFTNTK.+2	570.78	24.28	sp|P02671-2|FIBA_HUMAN	21627.5	27855.5	5572.94	30615.8	13781.7	157476	34611.2	166632	43021.2	38969.5	12250.1	26368.3	45735.5	65989.1	16854.4	105490	143361	28355.1	32683.9	22706.9	47555.5	142334	47147.3	5377.9
777	sp|P02671-2|FIBA_HUMAN.HPDEAAFFDTASTGK.+3	531.911	30.95	sp|P02671-2|FIBA_HUMAN	52661.1	60657.9	37562.5	81300.8	34079.2	246102	4674.48	280337	79582	55819.2	13608.3	67293.1	64320.9	155362	15444.7	205799	14886.9	84458.2	19109	29105.4	94491.8	376794	134690	52798.3
778	sp|P02671-2|FIBA_HUMAN.GLIDEVNQDFTNR.+2	760.871	42.26	sp|P02671-2|FIBA_HUMAN	7993.05	14619.8	7648.03	6269.93	13573.7	83707.2	2885.02	180330	7363.77	55848.3	7058.14	11713.1	2467.24	39551.7	11014.8	105287	49906.1	28449.7	10121.9	16263.1	10779.5	89565.7	8385.16	7371.73
779	sp|P02671-2|FIBA_HUMAN.ESSSHHPGIAEFPSR.+3	546.594	14.24	sp|P02671-2|FIBA_HUMAN	10715.5	7620.1	6520.25	13753.7	8022.17	30201.1	16688.5	56549.2	8729.73	5529.56	17891.2	9036.44	1397.2	10512.7	6084.92	24780.1	10214.6	8361.69	2408.86	20718.3	4423.02	50572.3	8945.27	1297.37
780	sp|P02671-2|FIBA_HUMAN.LGEFVSETESR.+2	627.304	28.78	sp|P02671-2|FIBA_HUMAN	35695.8	52675.2	30096.1	76234	26535.1	53742.7	1883.09	96396.9	26326.1	5605.35	8862.18	38854.3	506.639	43598.7	2272.26	44997.7	26744.2	79218.6	7691.53	35314.2	10909.2	65588.6	79836.1	11109.1
781	sp|P02671-2|FIBA_HUMAN.GGSTSYGTGSETESPR.+2	786.842	16.42	sp|P02671-2|FIBA_HUMAN	6506.13	18289	6795.18	17909.9	7638.71	38161.7	4781.34	59449.1	6029.4	2807.12	3364.97	4788.88	6825.82	16011.6	1368.33	50249.8	66613	12173.1	3392.6	3250.25	9094.77	21246.6	38541.5	6762.95
782	sp|P02671-2|FIBA_HUMAN.PGSTGTWNPGSSER.+2	716.826	22.41	sp|P02671-2|FIBA_HUMAN	3221.66	13187.2	8601.59	25040.9	5501.28	59593.5	1895.72	100574	13703.4	7019.22	4951.47	8801.77	6704.87	32221.2	3433.99	47766.6	55538	7193.63	10753.1	4294.93	6652.42	46302.4	39496.7	6460.3
783	sp|P02671-2|FIBA_HUMAN.PNNPDWGTFEEVSGNVSPGTR.+3	754.014	49.32	sp|P02671-2|FIBA_HUMAN	13200	27003.5	7425.97	19749.6	8679.39	101776	7026.91	165619	28447.5	31312.6	2332.69	31167.2	6852.7	60258.5	3456.59	102893	146215	45142.8	31595.5	22571.9	25248.5	118100	94040.6	21723.1
784	sp|P02671-2|FIBA_HUMAN.TVIGPDGHK.+2	462.251	29.89	sp|P02671-2|FIBA_HUMAN	13922.8	21715.2	116.344	34150	15096.7	23683.8	5622.83	69810.5	68541.1	20094.7	40700.2	7482.73	31715.5	109761	1873.93	14685.5	43755	9537.64	1175.01	23524.9	1478.33	54196.3	45618.8	2359.32
785	sp|P25311|ZA2G_HUMAN.EIPAWVPFDPAAQITK.+2	891.975	55.73	sp|P25311|ZA2G_HUMAN	182968	149134	128762	309147	148414	90972.5	93676.6	134939	180846	195060	92177	330388	212005	297713	42425.7	111798	302.779	195375	355567	215096	172062	91532.5	450439	213087
786	sp|P25311|ZA2G_HUMAN.HVEDVPAFQALGSLNDLQFFR.+3	801.741	57.84	sp|P25311|ZA2G_HUMAN	55653.6	63991.2	39918.4	114083	43240.5	79189.6	42552.7	123074	108983	211215	70064.1	230209	171332	238580	33205.5	77918.2	0	51700.5	249317	55726.1	131948	73147.6	202590	137988
787	sp|P25311|ZA2G_HUMAN.WEAEPVYVQR.+2	638.82	32.72	sp|P25311|ZA2G_HUMAN	117134	111588	82249.3	244384	117429	85253.5	51402.7	100050	111140	22874.3	36270.1	240649	59650.4	210318	16320.8	48796.9	29357.6	92268.4	197695	23571.2	56907.7	41534.3	63665	105637
788	sp|P25311|ZA2G_HUMAN.YSLTYIYTGLSK.+2	704.872	45.82	sp|P25311|ZA2G_HUMAN	51628.5	50004.6	47824.2	92481.2	44765	43536.7	29107.8	54153.9	52432.6	99919.4	37402.8	91934.8	108111	99653.7	4125.31	43431.6	28237	33798.9	156577	45209.9	65545.1	36559.8	65599.1	66979
789	sp|P25311|ZA2G_HUMAN.C[CAM]LAYDFYPGK.+2	617.284	45.55	sp|P25311|ZA2G_HUMAN	4159.6	9455.57	13598.8	17486	16196.2	16589.9	6281.75	15274.2	17419.2	3806.59	19195.2	32183.7	50854.9	60431	10314	14109.8	28871.1	30565	40114.7	45143.5	24923.2	19995.1	8833.14	60097.7
790	sp|P25311|ZA2G_HUMAN.AGEVQEPELR.+2	564.288	24.02	sp|P25311|ZA2G_HUMAN	142022	102482	101457	249712	117501	3927.9	130891	62445.1	110540	11691.2	57330.1	211216	44582.1	158615	4082.67	72675.9	53759.6	90577.3	66489.7	70399.5	31207	27032.9	156335	66754.4
791	sp|P25311|ZA2G_HUMAN.QDPPSVVVTSHQAPGEK.+3	592.636	23.78	sp|P25311|ZA2G_HUMAN	25372.8	12957.4	13465.3	25963.4	8153.75	8646	5560.24	36832.5	21378.4	24398.8	1299.38	15499.5	21117.8	13420.3	3282.84	7499.12	10888.6	16272.2	4827.41	6047.24	9970.79	5951.85	13011.5	121.156
792	sp|P25311|ZA2G_HUMAN.PPSVVVTSHQAPGEK.+3	511.607	20.92	sp|P25311|ZA2G_HUMAN	13416.7	7408.81	2808.22	13163.2	4298.64	2390.09	3597.94	3774.09	2669.86	11587.6	199.979	10834.5	5209.7	31385.9	6209.35	1853.44	2682.26	5645.38	4127.72	10818.8	2863.08	8529.46	3516.28	7408.02
793	sp|Q96GW7|PGCB_HUMAN.EAEVLVAR.+2	443.753	23.39	sp|Q96GW7|PGCB_HUMAN	131828	319301	156696	173148	247803	342929	172890	543114	776900	141650	579492	805796	406765	581732	140420	314260	553335	264298	427982	264898	195784	286961	232823	280345
794	sp|Q96GW7|PGCB_HUMAN.YPIVTPSQR.+2	530.793	26.67	sp|Q96GW7|PGCB_HUMAN	144244	225475	134682	139364	171159	329421	132782	374691	458247	150719	457380	611506	374913	515778	96824.1	221001	389260	77356	308410	94672.2	180279	236186	155256	178653
795	sp|Q96GW7|PGCB_HUMAN.DVLEGDSSEDR.+2	611.265	19.79	sp|Q96GW7|PGCB_HUMAN	196200	175854	105044	121586	185892	107217	102082	165631	214209	61772	177115	254399	66821	136270	31342.4	88106.2	128783	56172.6	84224.7	54987.9	41883.3	55797.1	74320.4	64819.4
796	sp|Q96GW7|PGCB_HUMAN.ALHPEEDPEGR.+3	417.198	15.64	sp|Q96GW7|PGCB_HUMAN	411818	349778	222986	313569	371627	70204.2	45246.7	59329	12961.1	26631.9	20865.9	87836.7	14757.7	42218.5	1890.62	74393.4	102846	32052.9	63975.6	75307.2	12585.3	18320.6	32115.8	52086.3
797	sp|Q96GW7|PGCB_HUMAN.EAC[CAM]YGDMDGFPGVR.+2	787.324	38.75	sp|Q96GW7|PGCB_HUMAN	20385.8	36366.1	25166.4	28327.6	18636.1	25447.7	9415.68	10167.8	31232.6	11412	68260.3	82948.8	3946.48	27487	15962	3100.72	28349.4	851.868	18813.2	9983.76	22560.1	22380.9	8799.54	15744.7
798	sp|Q96GW7|PGCB_HUMAN.IATPEQLYAAY.+2	620.316	45.81	sp|Q96GW7|PGCB_HUMAN	25983	36519.8	1758.65	5150.01	34702.8	3004.58	22397.8	17577.2	16454.5	15976.2	83024.8	80332.2	76461.1	36700	10416.7	16995.3	8016.45	15845	5689.95	36556.8	3936.7	35014.3	22629.4	6199.72
799	sp|Q96GW7|PGCB_HUMAN.IAGDAPLQGVLGGAL.+2	676.383	56.79	sp|Q96GW7|PGCB_HUMAN	21596.1	24134.6	20668.8	16589.3	37027	14244.8	10767	27339.3	38129.9	5258.99	39171.8	99595.8	13202.7	44299.2	5232.13	16148.6	807.814	42059.4	19512.6	44365.9	16875.2	21858.8	31499.7	37554.7
800	sp|Q96GW7|PGCB_HUMAN.IATPEQLYAAYLGGYEQC[CAM]DAGWLSDQTVR.+3	1092.52	55.75	sp|Q96GW7|PGCB_HUMAN	5027.25	1422.36	5794.05	2480.79	1997.75	16319.4	716.483	25540.7	24040.8	18497.6	16964.6	51163.4	4932.7	26869.3	3253.15	1189.02	0	4721.32	6111.93	6087.22	4215.21	13691	623.761	16791.9
801	sp|Q96GW7|PGCB_HUMAN.AAWDGGLDHC[CAM]SPGWLADGSVR.+3	743.004	39.43	sp|Q96GW7|PGCB_HUMAN	1393.78	3780.6	4625.2	2493.74	3176.22	3375.03	4605.35	19554.3	24300.3	4802.59	34558.3	73015.7	1572.15	26940.5	10431.6	6372.73	3650.76	23915.9	2449.38	23229.3	5153.09	15597.7	1486.18	20588.6
802	sp|Q96GW7|PGCB_HUMAN.LGGYEQC[CAM]DAGWLSDQTVR.+2	1027.97	37.7	sp|Q96GW7|PGCB_HUMAN	615.732	10987.8	4829.01	8279.12	10070.9	9220.84	869.086	14400	26646.8	4459.95	16633.3	96540.9	2865.85	21758	1561.99	12904.6	4631.2	20212.6	2553.66	21230.5	4433.5	1142.76	466.3	14015.8
803	sp|P04004|VTNC_HUMAN.FEDGVLDPDYPR.+2	711.83	38.2	sp|P04004|VTNC_HUMAN	548901	465036	415267	489024	296787	364227	3677.57	765698	203252	115914	122083	287895	369791	402524	21719.5	211543	431097	70621	198911	107684	134017	448346	301068	132448
804	sp|P04004|VTNC_HUMAN.PFDAFTDLK.+2	527.266	41.33	sp|P04004|VTNC_HUMAN	119116	108234	90447.6	148523	120875	69654.2	15600.4	164408	48341.2	97397.8	30675.5	111079	21261.6	112677	5461.78	44792.4	92754.7	57995.1	30572.4	43550.1	13274.3	60813	127574	47071.6
805	sp|P04004|VTNC_HUMAN.GNPEQTPVLKPEEEAPAPEVGASKPEGIDSR.+4	807.906	32.33	sp|P04004|VTNC_HUMAN	96205.8	72028.7	55944.2	81750.1	63248	11185.7	10206	39977.5	17376.7	2292.01	5855.02	37664.1	675.509	41259.3	1049.96	7520.42	9281.09	15280.5	7654.83	12861.4	2001.87	27975.5	43574.3	8782.15
806	sp|P04004|VTNC_HUMAN.DWHGVPGQVDAAMAGR.+3	556.263	37.09	sp|P04004|VTNC_HUMAN	203950	533028	407584	522418	144959	279245	28665.4	256941	109241	58798.1	158858	183101	156770	189137	10088.3	69584	275776	33657.5	129634	21586.5	77073.8	211285	131442	45203.1
807	sp|P04004|VTNC_HUMAN.GNPEQTPVLKPEEEAPAPEVGASKPEGIDSRPETLHPGR.+6	686.85	32.05	sp|P04004|VTNC_HUMAN	72012.3	54594.3	34504.4	57628.3	36687.1	25329.5	2011.11	49286.8	1148.6	3216.92	7231.86	22491.4	12494.2	49178.3	128.005	7394.13	13818.8	523.661	12057.9	19354.1	3193.56	54857.5	30132.5	11713.6
808	sp|P04004|VTNC_HUMAN.VDTVDPPYPR.+2	579.793	27.92	sp|P04004|VTNC_HUMAN	336732	316473	226213	13981.4	21253.1	284503	93800.8	630025	140572	36261.2	4616.48	282527	110885	284081	1633.42	168220	1243.98	141157	108856	193456	50832.9	210637	270049	100885
809	sp|P04004|VTNC_HUMAN.DVWGIEGPIDAAFTR.+2	823.912	56.65	sp|P04004|VTNC_HUMAN	100072	299588	150796	207700	103721	509134	47723.6	1.17915e+06	302190	355184	205949	307324	656598	609263	36426.9	362442	511.083	67525	444948	101413	189363	713148	327317	259413
810	sp|P04004|VTNC_HUMAN.WLGC[CAM]PAPGHL.+2	554.274	38.32	sp|P04004|VTNC_HUMAN	96954.6	93666.5	65916.9	97828.1	65720.6	76865.3	11089.2	113300	48605.6	10341.4	7209.98	33868.6	22466.1	82169.9	12984.3	24354.8	48155	14217.3	10004.9	20632.4	20435.2	56570.5	24762.7	7318.19
811	sp|P04004|VTNC_HUMAN.SIAQYWLGC[CAM]PAPGHL.+2	835.411	50.28	sp|P04004|VTNC_HUMAN	54224.6	58527.2	31419	37800.4	17914.1	184008	6155.95	210730	37880	64874.6	24252.7	6484.68	75931.6	55560.4	2680.22	65100	8079.24	4322.31	2161.25	17551.2	20741	83224.9	1015.5	16288.6
812	sp|P04004|VTNC_HUMAN.GQYC[CAM]YELDEK.+2	652.777	26.66	sp|P04004|VTNC_HUMAN	114909	76749	79233.9	101008	66676.3	194461	17145.1	303281	67928.8	83684.1	29772.8	79720.7	89692.9	96373.7	7486.97	75200.4	159101	19670.2	53824.6	25211.5	29263.9	107293	56177.2	27874.4
813	tr|A0A0R4J2G7|A0A0R4J2G7_HUMAN.LEFPGAEGQWTR.+2	695.841	52.15	tr|A0A0R4J2G7|A0A0R4J2G7_HUMAN	7904.79	44915.9	13677.2	21606.3	27227.4	107374	106930	205427	221913	99507.8	314790	459587	232100	406498	88092.4	119326	254141	110295	332446	82642.1	93274.4	169647	82144.8	172795
814	tr|A0A0R4J2G7|A0A0R4J2G7_HUMAN.EPYPGSAEVIR.+2	609.312	29.09	tr|A0A0R4J2G7|A0A0R4J2G7_HUMAN	107720	207569	100360	141495	163253	177711	87935.5	133351	43050.6	27313.4	84120.9	231712	59299.7	147981	46009.4	86624.3	175738	51837.1	151185	78614	45701.4	61349.9	56574.1	160502
815	tr|A0A0R4J2G7|A0A0R4J2G7_HUMAN.SDLYIGGVAK.+2	511.779	30.89	tr|A0A0R4J2G7|A0A0R4J2G7_HUMAN	32087.7	32733.9	10936.9	23119	22735.3	43253.6	12812.6	68846	84575.5	19881	76439.7	171913	58481.7	102657	24500.7	38581.6	60158.3	25945.2	58397	23661.4	35479.2	94024.6	26694	38536.7
816	tr|A0A0R4J2G7|A0A0R4J2G7_HUMAN.ITTQITAGAR.+2	516.296	22.04	tr|A0A0R4J2G7|A0A0R4J2G7_HUMAN	26821	38904.6	13452.4	30296.4	35801.6	36138.7	4565.75	38244.6	63764	22076.8	64852	127011	35084.3	70821.3	32419.2	40783.7	6480.59	30406.8	34849.7	25250.2	20655	54593.6	24539.1	38072.9
817	tr|A0A0R4J2G7|A0A0R4J2G7_HUMAN.VVDEWLLDK.+2	558.8	41.01	tr|A0A0R4J2G7|A0A0R4J2G7_HUMAN	30491.8	38231.5	7460.02	35078.6	30742.2	61118.3	15182.8	87334	78807	16910	73129.7	177689	55191.2	88557.7	20019.2	39190	79180.4	44984	94285.5	43482.7	37708.9	89454	45683.3	33176.4
818	tr|A0A0R4J2G7|A0A0R4J2G7_HUMAN.IQLPVVMHTEAEDVSLR.+3	646.344	44.29	tr|A0A0R4J2G7|A0A0R4J2G7_HUMAN	7212.6	21245.6	1871.37	16651.5	7281.67	20580.2	7734.66	23881.1	43156.9	5826.08	62807.5	120401	26348.5	53988.8	7011.59	1408.66	38031.7	19873.9	24392.9	3542.9	13473.9	10033.5	12985	7002.39
819	tr|A0A0R4J2G7|A0A0R4J2G7_HUMAN.FNVGTDDIAIEESNAIINDGK.+2	1118.04	50.95	tr|A0A0R4J2G7|A0A0R4J2G7_HUMAN	41590.9	7096.1	1932.87	7468.08	9164.56	14524.6	5340.86	7745.58	17587.4	9651.97	12856.5	28955.9	20506.5	10265.6	533.158	15368.1	3295.14	3779.02	2110.25	7798.29	1067.53	22556.6	11110.4	22460.4
820	tr|A0A0R4J2G7|A0A0R4J2G7_HUMAN.LPDLISDALFC[CAM]NGQIER.+2	980.994	61.3	tr|A0A0R4J2G7|A0A0R4J2G7_HUMAN	2711.73	5242.35	3848.2	3554.37	1215.43	6025.8	6166.72	22225.1	11053.3	9199.01	20328.7	35272.4	19530.6	4938.01	11176.5	298.025	3796.79	9628.07	26896.9	4527.21	2141.03	15973.7	15676.7	9032.09
821	sp|P12259|FA5_HUMAN.AEVDDVIQVR.+2	572.304	32.77	sp|P12259|FA5_HUMAN	14053.2	34247.8	24386.7	23001.8	20542.8	30892.1	8578.3	63011.3	40311.7	3287.52	39330.1	45444	63892.7	45902.1	1850.54	39300	47031.8	31450.8	41602.8	39775.2	31943.1	55930	11650	12293.3
822	sp|P12259|FA5_HUMAN.EDGILGPIIR.+2	541.814	43.46	sp|P12259|FA5_HUMAN	17611.9	26838.9	22947.1	24530.7	18574.7	36694.3	7233.01	80540.2	76933.7	12255.2	68197.3	76537.5	81548.4	106468	7183.1	36516.5	69359.8	32956.6	186.929	41545	66503	90818.7	37476.8	11830.8
823	sp|P12259|FA5_HUMAN.LSEGASYLDHTFPAEK.+3	588.953	25.67	sp|P12259|FA5_HUMAN	4369.4	23860.6	22287.8	17738.2	17345.3	7656.57	6899.19	29597.6	26801.6	5131.19	9579.47	28948	29067.2	1278.34	2936.8	3769.62	28082.3	9624.12	26755.8	2901.21	26229.3	14109.9	17258.7	4279.47
824	sp|P12259|FA5_HUMAN.EVIITGIQTQGAK.+2	679.388	33	sp|P12259|FA5_HUMAN	61148.7	58992.5	46788.3	47004.9	36622.1	42649.7	6085.41	108188	41964.7	4494.87	50290.1	80608.6	115914	93581.5	21796.4	33284.8	38932.1	21093.6	18370.4	37242.2	44536	72876.6	18949.3	16354.2
825	sp|P12259|FA5_HUMAN.ENQFDPPIVAR.+2	643.33	35.18	sp|P12259|FA5_HUMAN	9133.49	30251.2	18844.4	17959.6	11563.4	29130.3	691.742	59174.6	40075.9	10254.8	38967.1	46948.5	58669.4	2935.01	2853.6	23273	56552.9	28234.1	42772.6	36535.9	37961	46697.7	6207.26	1411.65
826	sp|P12259|FA5_HUMAN.EKPQSTISGLLGPTLYAEVGDIIK.+3	843.798	57.87	sp|P12259|FA5_HUMAN	16307.9	11564.8	10358.3	7645.79	9699.57	19115.1	1900.71	37458.2	27491.2	9857.99	19101.3	35340	38532.9	48573.6	8072.17	12994.6	0	2628.09	34034.2	15846	27784.4	44892.1	3601.76	9671.74
827	sp|P12259|FA5_HUMAN.SQHLDNFSNQIGK.+3	496.579	24.99	sp|P12259|FA5_HUMAN	28502.1	4991.55	1122.6	19866.9	5488.49	5788.86	13044.9	44046.3	33760.3	21211	30477.8	11346.7	10729	13187.3	7499.32	12668.4	1912.92	22912.4	18538.2	20161.1	24510.9	22255.9	25131.6	42440.1
828	sp|P12259|FA5_HUMAN.SEAYNTFSER.+2	602.268	23.48	sp|P12259|FA5_HUMAN	29954.7	35016.3	31744.8	24493.2	10342.2	23139.9	938.574	41400.6	23368.5	59000.4	12552.3	34198.7	39443.8	34848.2	9590.06	18292.4	38280	15838.8	26719	27674.8	8826.76	14276.6	26930.6	10360.6
829	sp|P12259|FA5_HUMAN.ASEFLGYWEPR.+2	677.825	45.48	sp|P12259|FA5_HUMAN	33690.2	22850.1	36495.2	31383.2	26665.4	35726.3	14669.4	59369	30123	7627.74	41195.5	72400.5	62459.4	69363.1	14876.3	32903.8	50905.5	31335.5	4565.21	58172	36644.7	53225.2	22335.2	4093.46
830	sp|O75326|SEM7A_HUMAN.TVLFHEPGSSSVWVGGR.+3	605.644	38.93	sp|O75326|SEM7A_HUMAN	20113.5	23361.8	16470.3	17937.4	31951	14378.8	16340.2	2179.82	27046.8	7047.35	26562.3	143395	8469.53	68764.2	328.192	12684.9	24965.1	16179.9	1662.96	27352.1	4543.99	25664.6	16405	35807
831	sp|O75326|SEM7A_HUMAN.VYLFDFPEGK.+2	607.808	48.2	sp|O75326|SEM7A_HUMAN	167492	176290	154788	136253	208589	157974	100805	292035	368186	118600	370508	849247	243788	436079	151463	172724	14387.3	228250	361850	294407	153633	292130	218065	254674
832	sp|O75326|SEM7A_HUMAN.DC[CAM]ENYITLLER.+2	713.338	46.95	sp|O75326|SEM7A_HUMAN	81897.3	105903	77445.3	65473.1	98659.2	70471.4	49889.5	166199	284299	50494.6	214396	446377	57517.7	234570	88757.9	100807	1911.2	133451	199243	169199	11153.4	164603	115113	155166
833	sp|O75326|SEM7A_HUMAN.SVLQSINPAEPHK.+3	473.925	28.66	sp|O75326|SEM7A_HUMAN	67218.7	84903	54479	49823.9	81161.6	83344	23757.8	142169	166260	15139.3	118645	286459	73167	171940	49778.2	70941.4	100704	72241	96766.7	60624.8	59151.9	145727	56106.6	82756.8
834	sp|O75326|SEM7A_HUMAN.GDQGGESSLSVSK.+2	625.797	17.56	sp|O75326|SEM7A_HUMAN	42905.4	52098.3	34082.1	32590.9	47453.8	15939.1	9510.14	26644	69027.8	20819.5	47394.2	57936.4	12003.9	25527.1	15219.9	18788.2	26681.4	10863.3	18099.1	10119.1	11187.1	20725.1	21501.5	27518
835	sp|O75326|SEM7A_HUMAN.VDFGQTEPHTVLFHEPGSSSVWVGGR.+4	707.096	42.66	sp|O75326|SEM7A_HUMAN	25022.2	45949.7	28627.6	22454.8	2811.61	29107.9	5147.55	48258.9	60623.7	386.173	64404.9	17690.6	72742.6	35238.6	12203	18150.5	48373.7	4002.35	88694.2	6520.2	28751.8	64001.1	6509.64	18292.4
836	sp|O75326|SEM7A_HUMAN.ATIVHQDQAYDDK.+3	501.907	17.3	sp|O75326|SEM7A_HUMAN	38337.6	48281.4	35684.4	32741.5	49293.2	14050.3	2322.8	34347	49121.7	6159.36	41530.8	85237.1	10325.4	34657.2	19497.7	24339.5	32767.7	24226	28377.3	19796.3	10000.8	18501.9	19068	24648.8
837	sp|O75326|SEM7A_HUMAN.VDFGQTEPH.+2	515.235	13.28	sp|O75326|SEM7A_HUMAN	1959.57	19743.4	387.59	5927.38	63754.9	2611.61	3203.86	38545.7	50301.8	8204.24	13986.6	61015.9	3036.15	65486.8	12033.7	15925.5	21703	36424.7	12594.4	42019.6	13667.8	13126.4	53523.1	30239
838	sp|O75326|SEM7A_HUMAN.GESELYTSDTVMQNPQFIK.+2	1094.02	42.83	sp|O75326|SEM7A_HUMAN	17526.6	20710.7	16710.8	13280.9	10396.8	15722.8	1082.07	8002.39	21581.4	7853.19	32534.2	37574.5	6267.16	12773.9	906.235	7225.17	11031.7	5562.67	4168.44	1886.88	6055.32	8635.91	5700.72	4770.4
839	sp|P29622|KAIN_HUMAN.IVDLVSELK.+2	508.305	42.48	sp|P29622|KAIN_HUMAN	110288	63491.9	36155.3	70907.3	33532.1	172862	2426.16	259372	138155	11921.1	87892.9	295035	165434	430133	73821.5	174077	117429	89456.2	161217	160775	108949	281464	157187	169292
840	sp|P29622|KAIN_HUMAN.WADLSGITK.+2	495.766	36.04	sp|P29622|KAIN_HUMAN	22415.8	15240	10169.9	35725.7	30159.5	73820.3	1340.51	62990.3	31988.3	13667.8	16402.3	52188.6	38955.6	75813.8	11478.8	26114.1	41016.3	12818.1	69996.2	24856.9	19342.9	44247.7	20867.7	29961.7
841	sp|P29622|KAIN_HUMAN.FSISGSYVLDQILPR.+2	847.959	57.25	sp|P29622|KAIN_HUMAN	18308.7	4767.78	4353.89	7769.36	5252.87	76055.6	869.301	107637	27644.2	53293.7	9695.84	68408.8	102727	108681	10300.8	43614.5	234.482	8316.38	110457	21554	29540.3	73127	36663.2	57828.9
842	sp|P29622|KAIN_HUMAN.FYYLIASETPGK.+2	694.859	41.75	sp|P29622|KAIN_HUMAN	33861.4	19989.4	4490.61	20985.4	19792.7	51342.7	5824.51	96306	37539.6	40391.6	30132.1	54916.5	96541.1	108930	15468	47538	50402.8	16521.9	87909.1	20101.9	39029.2	76963.8	25902.8	33698.2
843	sp|P29622|KAIN_HUMAN.LFHTNFYDTVGTIQLINDHVK.+4	619.572	60.42	sp|P29622|KAIN_HUMAN	4876.03	8427.84	2213.15	5388.61	7685.7	70977	365.346	83376.7	13690.9	30552.1	18047.7	53787.7	100098	107638	13536.9	54423.2	14375.1	2722.09	106457	13353	24815.4	70309	14980.1	35641.1
844	sp|P29622|KAIN_HUMAN.FYDTVGTIQLINDHVK.+3	621.66	38.16	sp|P29622|KAIN_HUMAN	2185.09	6867.59	1541.95	5974.44	3271.75	62093.2	365.346	65936.9	7265.59	19120.6	3824.05	45969.1	90186	95053.1	13169.8	53339.5	64535.3	9716.65	94613.6	12327	21950.1	60066.4	12930.1	34298.4
845	sp|P29622|KAIN_HUMAN.GFQHLLHTLNLPGHGLETR.+4	535.791	36.12	sp|P29622|KAIN_HUMAN	12112.4	6710	4953.46	7637.62	15624.3	43724.2	15819	39874.8	13210.1	28875.5	19423.5	51690.2	46685.2	52263.3	11890.7	30636.1	41961.9	3335.04	85742.4	6958.3	16480.6	81546.6	8085.34	14696
846	sp|P29622|KAIN_HUMAN.TLNLPGHGLETR.+3	436.574	32.62	sp|P29622|KAIN_HUMAN	1785.86	6644.03	2463.7	1998.29	3782.14	21074.5	9686.27	63852.6	27957.1	16696	17461.5	88391.2	43560.2	106897	7961.62	24174.6	35484.8	23018.7	19408.4	23951	10107.2	24721	20820.8	35992.9
847	sp|P29622|KAIN_HUMAN.GDATVFFILPNQGK.+2	753.901	50.5	sp|P29622|KAIN_HUMAN	14176.7	1229.54	6203.46	3077.61	3363.1	91204	5852.67	93360.7	19641.9	28381.8	15023.8	13437.4	52804.2	3615.08	6187.34	20871.5	5491.12	3067.6	84691	20813.7	3086.77	37294.2	2423.5	19375.1
848	sp|Q9NQ79-3|CRAC1_HUMAN.GVALADFNR.+2	481.756	32.61	sp|Q9NQ79-3|CRAC1_HUMAN	94083.1	188500	113606	178832	197735	199752	87461	284731	268640	73917.3	249610	525844	236824	402757	91277.2	151323	352700	74103.9	194281	112970	207724	386147	107709	94097.8
849	sp|Q9NQ79-3|CRAC1_HUMAN.LVNIAVDER.+2	514.79	30.24	sp|Q9NQ79-3|CRAC1_HUMAN	235419	230488	189051	263257	308802	170729	69480.9	236506	283402	52173.4	296224	498964	250713	250110	132658	171665	5682.66	99887.5	192593	151607	262451	559804	170280	115883
850	sp|Q9NQ79-3|CRAC1_HUMAN.GVASLFAGR.+2	439.248	35.91	sp|Q9NQ79-3|CRAC1_HUMAN	64462.4	149550	75830.1	123732	133275	162194	67144.4	213371	164213	88409.1	172666	301223	110712	114865	39406.4	53153.9	246993	50622.9	137020	102871	61659.9	114834	14948.8	74830.1
851	sp|Q9NQ79-3|CRAC1_HUMAN.WEDILSDEVNVAR.+2	773.381	44.87	sp|Q9NQ79-3|CRAC1_HUMAN	63685	108454	55392.8	83807.1	94049.2	83602.9	16405.3	91841.7	149862	3334.45	107355	210656	71870.4	178211	13263.7	38052	107474	21335.9	78500.7	38880.2	27412.3	106641	60281.1	37956.7
852	sp|Q9NQ79-3|CRAC1_HUMAN.DVAAEAGVSK.+2	473.746	18.08	sp|Q9NQ79-3|CRAC1_HUMAN	124418	126823	82486.9	134317	157975	50049.7	40331.1	17701.9	103240	40485.4	79137.1	69905.1	28696.3	5735.56	25408.4	19272.7	100389	19340.9	8565.76	29124.3	31183.1	49043	10100.1	12780.3
853	sp|Q9NQ79-3|CRAC1_HUMAN.GDGTFVDAAASAGVDDPHQHGR.+4	545.749	28.4	sp|Q9NQ79-3|CRAC1_HUMAN	69466.6	93465.5	54541	87335.2	96244.5	69451.9	6488.94	81516.8	66518.7	5808.73	64895.5	197184	110339	106904	62391.8	59389.8	125127	95691.8	73787.3	34275.1	63098.3	110737	4233.6	6384.74
854	sp|Q9NQ79-3|CRAC1_HUMAN.EHGDPLIEELNPGDALEPEGR.+3	763.033	45.55	sp|Q9NQ79-3|CRAC1_HUMAN	130949	156005	114054	156994	200903	102956	28276	154793	214166	22338.2	145107	375384	92664	274797	62454	66283.3	11608.9	96040.2	90599.2	84937.8	99572.2	264682	142140	58436.2
855	sp|Q9NQ79-3|CRAC1_HUMAN.DEASSVEVTWPDGK.+2	760.349	36.83	sp|Q9NQ79-3|CRAC1_HUMAN	60194.3	72512.4	43831.5	62995	65446.5	46801.8	22444.9	51852.4	78976.1	3694.35	66968.9	120116	44503.5	68532.2	13286.6	30298.4	63684.4	22369.3	47340.2	9131.78	51703.3	79305.9	31644.8	24710.2
856	sp|Q9NQ79-3|CRAC1_HUMAN.VDIVYGNWNGPHR.+2	763.879	33.09	sp|Q9NQ79-3|CRAC1_HUMAN	1988.9	7991.57	1500.71	329.681	8094.34	1454.79	856.498	2506.54	3709.63	11142.3	4835.18	1142.98	20648	689.266	14572.3	12385.1	1835.43	9742.01	18877.8	12596.2	6425.98	37260.1	20591	9776.57
857	sp|Q9NQ79-3|CRAC1_HUMAN.IIDGGSGYLC[CAM]EMEPVAHFGLGK.+3	784.045	48.15	sp|Q9NQ79-3|CRAC1_HUMAN	5288.06	39152	28987	33639	23285.5	4922	1962.65	548.298	413.394	2232.45	43808.5	1807.89	1088.83	12433.8	1543.39	22780.7	375.394	1222.64	3088.33	5436.4	1779.9	27155	834.723	3787.22
858	sp|P16870-2|CBPE_HUMAN.LTASAPGYLAITK.+2	653.374	37.4	sp|P16870-2|CBPE_HUMAN	82552.4	68307.3	38735.4	69710.5	89956.7	204185	74506	335738	244795	70036.2	319412	630325	287201	309121	75039.5	129863	295426	99453.7	324222	104715	190214	216489	128188	143216
859	sp|P16870-2|CBPE_HUMAN.NSLISYLEQIHR.+3	491.6	47.17	sp|P16870-2|CBPE_HUMAN	51462.4	54692	35328.6	48870.2	70422.5	153088	19597.1	285729	216319	9019.33	317632	555306	217594	332588	73769.2	117809	1368.67	80777.5	300784	68886.1	108330	180836	123625	104950
860	sp|P16870-2|CBPE_HUMAN.ELLVIELSDNPGVHEPGEPEFK.+3	816.748	49.23	sp|P16870-2|CBPE_HUMAN	41676.2	16053.6	19901	30435.6	38010.2	67061.5	53808.6	120279	80214.7	3042.12	83552.8	256466	79450.3	133540	34249.9	33173.2	8985.74	50175.4	70550.6	43451.7	72451.7	73285.9	138309	78447.8
861	sp|P16870-2|CBPE_HUMAN.SNAQGIDLNR.+2	544.278	21.76	sp|P16870-2|CBPE_HUMAN	28160.1	41945.1	24702.8	40377.1	59578.4	94138.9	33883	103318	94902.3	41408.5	120685	238599	72231.5	146148	34512.1	77637.1	151231	69634.4	93324.6	47401.5	50529.1	54478.1	60865.7	62637.5
862	sp|P16870-2|CBPE_HUMAN.IHIMPSLNPDGFEK.+3	533.273	40.65	sp|P16870-2|CBPE_HUMAN	110098	53312.8	37744.4	53620.7	38370.8	76313.2	6571.98	78183.9	87394.4	24153.9	203436	261503	74986.4	102230	16839.5	35901.9	70362.5	34221.7	60892.9	44012.6	71324.2	52521.5	63398.9	37110.4
863	sp|P16870-2|CBPE_HUMAN.LQQEDGISFEYHR.+3	541.258	37.94	sp|P16870-2|CBPE_HUMAN	1045.56	511.058	8614.06	25428.3	19617.6	68697.3	17203.2	153470	93873.2	17707.9	122695	212640	99695.7	112629	28212.1	51845.6	65085.5	40929.1	94764	37040.6	68325	67923.2	7154.32	51310.5
864	sp|P16870-2|CBPE_HUMAN.VAVPYSPAAGVDFELESFSER.+3	757.371	55.07	sp|P16870-2|CBPE_HUMAN	24486	15914.9	12381.1	16781.9	22154.6	37706.8	26790.5	78352.8	83387.2	12629.4	75106.6	149778	27555.1	70447.2	20273	36794.1	614.044	16874.1	78644.9	21670.3	45500.4	62879.7	25085.3	44697.8
865	sp|P16870-2|CBPE_HUMAN.SGSAHEYSSSPDDAIFQSLAR.+3	742.342	33.08	sp|P16870-2|CBPE_HUMAN	2624.69	9723.71	6747.39	5908.03	4804.03	13691	1564.47	34751.6	42040.2	294.261	30205.4	74756.3	3894.27	29854.1	3533.87	4924.27	18962.7	30524.5	30234	4314.82	5468.4	17543	646.018	31173.8
866	sp|P16870-2|CBPE_HUMAN.SPAAGVDFELESFSER.+2	870.907	46.24	sp|P16870-2|CBPE_HUMAN	11534.8	236642	255331	10605.1	15809.8	13386.3	2461.46	14978.7	10385.8	1373.04	28756.8	58160.2	154753	24099.2	723.249	7860.22	1001.01	21092	3145.08	12841.1	56870.3	109696	31915.8	14083.8
867	sp|P98160|PGBM_HUMAN.GSVYIGGAPDVATLTGGR.+2	845.942	42.72	sp|P98160|PGBM_HUMAN	102374	83543.9	43066.1	39670.5	50888.1	110683	41709.6	120575	50480.8	37056.3	134999	209081	67761.6	278817	28747.3	30359.6	14812.6	63496.4	223999	77942.4	229918	205794	78892.4	92368.4
868	sp|P98160|PGBM_HUMAN.GSIQVDGEELVSGR.+2	723.365	36.38	sp|P98160|PGBM_HUMAN	92926	80932.2	81353.1	73749.9	51102.2	70071.5	31820	74402.7	65615.5	24585.7	86950	205963	76744.9	139414	16539	37670.1	54134.9	64027.4	86943.6	63575.3	102693	121345	74961.5	60155.5
869	sp|P98160|PGBM_HUMAN.SLPEVPETIELEVR.+2	805.935	48.05	sp|P98160|PGBM_HUMAN	57646.6	3243.71	63395.9	56991.6	41769.3	74758.4	26406.7	90357.4	92812.9	509.573	91111.4	7339.21	141774	15647.2	40255.9	61558.5	137.662	2781.76	133657	3365.88	202879	167709	90140.4	89627.9
870	sp|P98160|PGBM_HUMAN.LVSEDPINDGEWHR.+3	556.265	32.27	sp|P98160|PGBM_HUMAN	19493.9	49741.7	41738.4	44815.5	28163.7	79724.3	29027.6	80403.1	66353.5	1175.61	82475.7	122955	92799.4	146973	26341.1	60296.2	84646.3	51963.9	135464	46862.5	112589	71332.7	55440.3	56499.6
871	sp|P98160|PGBM_HUMAN.PGAPPPQPLDLQHR.+3	508.276	27.52	sp|P98160|PGBM_HUMAN	60025.6	86515.9	80689.8	63263.3	36438.7	107160	46291.6	135897	105888	22015.7	117843	187380	168132	224771	61262.5	93703.5	187772	30123.6	218209	14821.2	187176	162637	49512	98655.1
872	sp|P98160|PGBM_HUMAN.DFISLGLQDGHLVFR.+3	572.974	45.24	sp|P98160|PGBM_HUMAN	1947.81	10804.6	7483.77	5103.6	170.902	49983.9	6222.8	58120.6	27021.4	24518.3	41082.9	110881	150897	242403	35283.8	45364.7	353.098	24747.4	143891	10104.1	143003	100064	32357	81271.8
873	sp|P98160|PGBM_HUMAN.TSTASGLLLWQGVEVGEAGQGK.+2	1094.57	49.69	sp|P98160|PGBM_HUMAN	7631.29	39609.7	10289.5	7440.46	16683.6	22597.3	5152.01	1010.09	24506.9	5943.49	22557.1	52838.2	3019.91	52164.5	3935.16	7544.1	11205.3	16094.2	41693.7	2498.63	33386.1	56951.1	16923.5	18229.1
874	sp|P98160|PGBM_HUMAN.SPGPNVAVNAK.+2	527.288	31.33	sp|P98160|PGBM_HUMAN	5604.19	230.055	283.706	1747.58	15308.5	6817.92	7261.98	13449.8	2873.87	7808.66	3685.88	22822.4	17799.3	9824.03	4564.97	10976.1	6573.93	11376	21212.1	20885.1	9392.91	13300	10700.4	16263.9
875	sp|P14618-2|KPYM_HUMAN.PVAVALDTK.+2	457.271	25.95	sp|P14618-2|KPYM_HUMAN	113802	120238	76958.7	130085	110179	16326.2	39982.2	80972.1	34595.3	35190.6	31338.7	67423.7	63260.4	17698.8	10735.4	10194.2	85576.1	43780	94495.5	11576.9	60993.4	110867	47496.2	22481.8
876	sp|P14618-2|KPYM_HUMAN.LDIDSPPITAR.+2	599.327	35.78	sp|P14618-2|KPYM_HUMAN	45393.8	113625	70378.5	101308	83348.1	47414.7	16342.6	46033.5	43360.7	21059.8	38414.9	68346	34326.6	39454.9	12771.4	8907.7	57664.1	20424.1	10478.1	4899.25	53399.7	114136	19564.2	4171.98
877	sp|P14618-2|KPYM_HUMAN.NTGIIC[CAM]TIGPASR.+2	680.356	33.44	sp|P14618-2|KPYM_HUMAN	20843	57018	24283.8	46633.1	31574	29126.2	3793.43	14498.3	20793	9346.17	17238	196894	9387.82	219168	40821.7	76257.2	38156.6	43550.1	33058.4	16527.9	3748.84	31703.7	6191.04	93623.5
878	sp|P14618-2|KPYM_HUMAN.TATESFASDPILYR.+2	785.891	40.35	sp|P14618-2|KPYM_HUMAN	28858.6	56645.5	28515	55143.8	43785.6	20642.3	3167.52	20361.9	29997.7	3650.13	26280.2	52920.8	5010.37	30196.7	2308.2	11917.2	17841.3	7591.87	2695.07	9869.29	12696.8	31855.9	9574.66	293.04
879	sp|P14618-2|KPYM_HUMAN.GVNLPGAAVDLPAVSEK.+2	818.949	44.31	sp|P14618-2|KPYM_HUMAN	49979.6	50664	32847.7	53409	56238	28217.3	4917.27	17376.4	17939	1188.89	18712.2	62316.1	4056.5	23649.9	2321.53	9202.59	5971.77	3128.2	838.849	14289.8	12867.1	8395.63	3670.12	3737.8
880	sp|P14618-2|KPYM_HUMAN.IYVDDGLISLQVK.+2	731.911	48.11	sp|P14618-2|KPYM_HUMAN	28542	31518.4	28825.7	36783.9	29918.8	18208.6	462.888	11992.9	11177.2	4602.08	8444.59	26125.4	7737.09	19452.6	2365.19	710.85	628.604	923.377	9804.03	2190.26	8677.33	16230.3	5819.26	1613.46
881	sp|P14618-2|KPYM_HUMAN.GADFLVTEVENGGSLGSK.+2	890.442	45.67	sp|P14618-2|KPYM_HUMAN	29327.4	20881	20371.4	2555.4	22413.4	26219.7	16888.1	20103.2	14839.8	3821.03	7999.01	6120.75	4466.97	3084.8	8308.28	3698.64	3593.9	4472.96	3624.02	4596.14	5865.88	16105.4	12214.4	6826.21
882	sp|P14618-2|KPYM_HUMAN.DPVQEAWAEDVDLR.+2	821.889	45.39	sp|P14618-2|KPYM_HUMAN	22569.5	48898.9	25981.5	39410.3	34501.2	31251.4	7754.46	988.301	2606.29	31349	11094.9	53565.1	9178.56	12253.4	702.286	8501.42	3126.12	2993.22	21128.9	1590.75	18422.5	17832.7	14041.4	5118.01
883	sp|P07225|PROS_HUMAN.IETISHEDLQR.+3	447.565	22.31	sp|P07225|PROS_HUMAN	43150.4	42487.9	45958.9	60046.7	35774.1	111386	4471.52	46754.5	49570.4	34738.7	91925.5	103946	86961.4	75435.6	24014.2	70897.9	100394	21709.4	77649	22009	33786.8	100780	38030.8	16119.8
884	sp|P07225|PROS_HUMAN.SFQTGLFTAAR.+2	599.814	39.16	sp|P07225|PROS_HUMAN	2693.08	12217.6	8830.85	12545.8	9305.99	82002.6	18815.3	95811.6	46557.8	33568.7	59859.5	59010.3	70541.9	66305.8	9987.13	38151.9	75919.3	1662.04	79397.8	6618.39	36547.9	12463.2	7834.84	32722
885	sp|P07225|PROS_HUMAN.EAVMDINKPGPL.+2	642.337	38.1	sp|P07225|PROS_HUMAN	56728.2	26806.5	31838.8	40241.6	24271.6	25592	11226	16270.5	21695.1	5848.36	47786.6	50532.8	7075.16	23786.6	5392.28	8074.9	2565.22	6103.69	3618.54	6570.06	19336.3	33293.5	19294.7	5474.87
886	sp|P07225|PROS_HUMAN.KVESELIKPINPR.+3	508.303	25.86	sp|P07225|PROS_HUMAN	47064.7	35301.5	28187.4	35684.5	24510.1	69833.2	4265.14	85395.8	29800.1	1814.27	35962.7	48071.3	56067.7	35210.9	10596.7	30114.5	46634.5	22572.8	52499.9	28218	20003.9	75906.8	15056.9	10373.2
887	sp|P07225|PROS_HUMAN.NNLELSTPLK.+2	564.817	33.96	sp|P07225|PROS_HUMAN	64245.1	46864.4	35766.7	43788.5	34687	75491.4	14364	133016	70562.4	4736.12	86070.8	102472	43725.2	62779.6	17457.6	44721.3	66360.1	7548.97	78102.9	15146.7	37075.5	156459	36238.6	16364.5
888	sp|P07225|PROS_HUMAN.AVSLVDSTSEK.+2	568.296	23.47	sp|P07225|PROS_HUMAN	60563.4	35178.1	37878.4	54002.3	43103	3743	6223.42	44386.4	3658.8	7340.9	89163.4	27149	16176.3	40421.8	1257.66	13834.3	21304.9	10100.5	23736.3	5621.81	7017.13	40939.4	38717.5	9422.76
889	sp|P07225|PROS_HUMAN.DVDEC[CAM]SLKPSIC[CAM]GTAVC[CAM]K.+3	680.313	28.45	sp|P07225|PROS_HUMAN	5540.78	2965.73	4870.78	8175.11	6390.69	47060.4	8357.85	33571.2	20599.5	15194	9722.47	12638.3	25679.3	9174.58	3180.21	21623.7	34226.1	4032.93	10289.3	9399.62	9655.65	75879.1	4217.25	3642.08
890	sp|P07225|PROS_HUMAN.FKPENGLLETK.+3	425.903	36.45	sp|P07225|PROS_HUMAN	3029.84	4504.08	12912.8	8082.97	4355.19	30065.7	6831.01	41960.2	14488.6	10231.8	19510.8	55693.1	849.092	4831.89	3667.81	11345.2	16277.5	4020.2	7166.27	3746.12	7537.86	20013.2	16558.4	8647.52
891	sp|P07225|PROS_HUMAN.VESELIKPINPR.+3	465.605	29.47	sp|P07225|PROS_HUMAN	12190.5	10436.7	6124.16	11782.2	11494.8	31877.9	27761.5	31603	19840.7	2237.74	19961.8	42686.5	36927.5	37090.7	3363.27	17664	2459.99	22159.1	21088.7	25664.7	3977.25	25682.6	1052.64	6830.38
892	tr|A0A1X7SBT7|A0A1X7SBT7_HUMAN.LVEAFGGATK.+2	496.774	26.93	tr|A0A1X7SBT7|A0A1X7SBT7_HUMAN	306893	416365	261902	324358	457814	368100	95450.3	524666	701165	18402.4	441920	1.2086e+06	237179	721168	184898	394899	626319	232249	303119	233932	147800	466522	147089	350671
893	tr|A0A1X7SBT7|A0A1X7SBT7_HUMAN.VAELEHGSSAYSPPDAFK.+3	635.639	32.07	tr|A0A1X7SBT7|A0A1X7SBT7_HUMAN	274436	343691	190004	260150	354025	208662	102199	257127	439724	66346.3	317655	1.09503e+06	215142	482179	113952	238536	486924	152435	328528	106075	176285	379123	153230	277497
894	tr|A0A1X7SBT7|A0A1X7SBT7_HUMAN.VAQLPLSLK.+2	484.811	38.86	tr|A0A1X7SBT7|A0A1X7SBT7_HUMAN	150438	162271	106464	98832.5	74114.6	227481	49288.1	215365	228669	109314	198312	553058	235867	434013	76952.1	196011	421594	3833.81	243392	15999.8	95999.4	320718	23633.3	115022
895	tr|A0A1X7SBT7|A0A1X7SBT7_HUMAN.GILILGQEQDTLGGR.+2	785.433	44.44	tr|A0A1X7SBT7|A0A1X7SBT7_HUMAN	500214	574776	355121	476566	678306	250489	658.259	369663	694791	7522.1	510578	1.83685e+06	103450	982689	152952	204547	257126	278921	136796	193630	151126	489054	250226	382837
896	tr|A0A1X7SBT7|A0A1X7SBT7_HUMAN.IIASVPLAASPAR.+2	633.382	36.75	tr|A0A1X7SBT7|A0A1X7SBT7_HUMAN	161265	438665	149836	306747	289485	191185	75456.6	167156	673.121	28393.1	77342.6	332680	80499.5	146108	38537.9	209041	384951	3153.74	173359	133937	850.705	18728	32522.7	125863
897	tr|A0A1X7SBT7|A0A1X7SBT7_HUMAN.LEQELPAR.+2	478.264	21.61	tr|A0A1X7SBT7|A0A1X7SBT7_HUMAN	72888.4	91564.1	60042.8	99347.8	113545	60677.9	22898.5	89892.6	114086	16226.2	51441.1	129274	25890.3	62608.8	11001.2	48886.2	151697	44907.4	41227.9	37752.3	18854.3	42740.6	14654	11870.7
898	tr|A0A1X7SBT7|A0A1X7SBT7_HUMAN.SVPGQANEIVLLEAGHEPMELLINDK.+3	939.488	55.76	tr|A0A1X7SBT7|A0A1X7SBT7_HUMAN	22227.8	21067.5	12378.5	13722.9	18575.6	18800.1	1477.62	5673.8	33788	2695.07	19399.7	102656	14862.6	31399.9	1287.62	4195.61	731.704	8152.94	2224.52	4750.46	6352.41	13875.9	13208.4	7763.13
899	tr|A0A1X7SBT7|A0A1X7SBT7_HUMAN.EELLLLQSTAEQLR.+2	821.954	49.76	tr|A0A1X7SBT7|A0A1X7SBT7_HUMAN	26135.4	103653	38346.4	70615.1	80489	51103.1	1253.77	67011.2	48188.2	25354.3	41668.7	137769	63965.4	77219.8	640.844	11460	4698.31	21684.9	42966.3	47925.6	13988.3	44312.7	28107.9	35417.4
900	tr|A0A1X7SBT7|A0A1X7SBT7_HUMAN.DGLWSAYQDGELQGSGENLAAWHPIKPH.+4	769.869	48.19	tr|A0A1X7SBT7|A0A1X7SBT7_HUMAN	78466.2	88655.3	48767.8	61247.4	84631.3	22700.5	9407.9	28384.2	50964.2	42601	24936	250466	3275.31	58529.8	1012.18	2457.15	136.457	22818.4	33531.1	15873.6	2682.76	25889.2	32867.4	28278.1
901	tr|A0A1X7SBT7|A0A1X7SBT7_HUMAN.VAELEHGSSAYSPPDAF.+2	888.907	38.1	tr|A0A1X7SBT7|A0A1X7SBT7_HUMAN	122094	57927.6	45171.4	54654.5	66857.6	26170.3	17348.2	32407.4	55946.8	3698.14	18059.3	118192	21466.9	18848.7	3177.42	8509.61	12311.3	13645	4809.69	17084.8	9121.41	42668	14038.7	10325.8
902	sp|P04156|PRIO_HUMAN.PIIHFGSDYEDR.+3	483.565	32.65	sp|P04156|PRIO_HUMAN	755105	779970	504560	783736	752808	868240	31040.6	1.05052e+06	611443	40652.8	542118	2.06812e+06	376427	1.10639e+06	89167.4	399735	1.1602e+06	195094	635946	149677	209756	513920	285820	322430
903	sp|P04156|PRIO_HUMAN.YPNQVYYR.+2	551.769	24.85	sp|P04156|PRIO_HUMAN	57947.7	108499	60214.1	110071	129276	250991	4283.16	165889	113429	12884.6	146054	170246	53103.3	232775	40994.9	119551	174296	83536	84916.3	80401.7	58501.1	129218	63066.8	111835
904	sp|P04156|PRIO_HUMAN.HMAGAAAAGAVVGGLGGY.+2	765.38	40.23	sp|P04156|PRIO_HUMAN	125033	78274.4	50465.1	103247	92962.8	28480.4	9041.27	31320.9	41219.7	2521.71	31699.8	62625.4	51065.9	67334.3	3921.65	4314.82	34102	21259.5	29543.8	25712.4	1059.52	24525.5	53486.6	10362.4
905	sp|P04156|PRIO_HUMAN.GENFTETDVK.+2	570.264	22.29	sp|P04156|PRIO_HUMAN	78735	71101.8	50494.6	79958.6	74324.8	36014	19192.2	53553.5	34791.9	7388.41	52475.3	123860	45841.6	75365.7	11083.8	49920.6	94166.8	39918.8	49897.2	37115.6	23043.4	44002.5	33389.4	29477.1
906	sp|P04156|PRIO_HUMAN.SRPIIHFGSDYEDR.+3	564.609	28.06	sp|P04156|PRIO_HUMAN	53643.8	39708	27269.7	45725.9	50000.9	71923.8	950.803	58196.4	19962.8	6760.37	9511.9	12842.2	12427.9	49085.5	6598.9	20478.1	46859.6	3297.37	26401.6	17487	21048	26169.6	9728.9	15753.3
907	sp|P04156|PRIO_HUMAN.YPGQGSPGGNR.+2	545.257	13.45	sp|P04156|PRIO_HUMAN	16597.4	18852.9	18813.9	28314.4	29213.6	3314.95	12499	46477.8	10403.5	1284.72	18618.5	10500.9	3611.48	11648.9	4483.3	15564.6	20368.5	11774.9	36974.2	15591.6	12850.6	7584.26	16639.3	8545.54
908	sp|P04156|PRIO_HUMAN.VVEQMC[CAM]ITQYER.+2	778.366	30.98	sp|P04156|PRIO_HUMAN	2656.22	10892.7	12596.6	11333.8	5015.92	48713.5	1078.88	24454.9	11384.5	18491.7	33488.3	9661.2	47397.4	66048.2	10859	14090	126080	1212.43	22922.6	4909.78	28820.1	2008	4349.49	3151.62
909	sp|P04156|PRIO_HUMAN.YPPQGGGGWGQPH.+2	669.305	28.31	sp|P04156|PRIO_HUMAN	6399.42	17492.7	9808.17	36816.1	3577.81	3386.78	15815.5	57580.9	4259.35	13437.1	13523.7	43677	15621.5	29922	7635.36	16016.9	19637.4	4701.4	9756.16	3160.66	6145.27	10795.4	18240.8	149.375
910	sp|P04156|PRIO_HUMAN.PGGWNTGGSR.+2	494.733	16.73	sp|P04156|PRIO_HUMAN	34644.8	31864.9	25207.9	68900.1	71116.2	39268.1	15553.6	56113.6	39951.3	29842.9	21440.3	49473	16324.4	19162.6	6835.97	23642.7	38988.4	18113.7	11761.1	14821.6	10622.7	4293.19	45737.3	17326
911	sp|Q15582|BGH3_HUMAN.LTLLAPLNSVFK.+2	658.403	57.01	sp|Q15582|BGH3_HUMAN	39546.4	35199.2	33282.8	38682.1	29306.2	112530	32634.8	130532	76751.5	94256.8	116896	246450	229074	320143	52210.3	132402	937.194	50516.8	237560	64900.1	166094	152386	77150.2	129668
912	sp|Q15582|BGH3_HUMAN.ILGDPEALR.+2	492.28	31.72	sp|Q15582|BGH3_HUMAN	31847.8	68786	54822	66061.5	34432.3	133685	34667.1	172116	107442	35232.7	124692	260364	201659	272733	62723.7	127500	166470	80820.5	128818	73724.6	186712	254660	86021.6	107580
913	sp|Q15582|BGH3_HUMAN.GDELADSALEIFK.+2	704.354	50.36	sp|Q15582|BGH3_HUMAN	6415.45	735.837	11798.8	32238.4	27144.2	39051.3	4843.34	42373.5	28612.1	35158.8	36091.5	60246.3	40389.7	24026.2	17152.5	44007.7	1398.68	42785.7	67082.2	44521.3	40924.9	51945.3	24602.4	30979.5
914	sp|Q15582|BGH3_HUMAN.VISTITNNIQQIIEIEDTFETLR.+3	897.48	61.97	sp|Q15582|BGH3_HUMAN	7313.41	3015.89	1157.13	9204.64	1802.03	16386.7	455.232	34360	12088.4	15114	14688.4	35118.4	28894.9	61829.2	9198.26	16800.9	0	5900.73	12730.6	1627.68	36399.2	36998.8	33209.7	30786.7
915	sp|Q15582|BGH3_HUMAN.IPSETLNR.+2	465.256	18.53	sp|Q15582|BGH3_HUMAN	4814.74	14928.3	9877.85	17699.9	7413.13	29624.1	31216.7	18166.9	2955.02	36110.2	29193.1	7278.02	31549	36276.3	21529.9	32750.8	50971.9	10499.4	29529.8	48365.6	32295.8	16419.4	15265.9	60600.3
916	sp|Q15582|BGH3_HUMAN.DILATNGVIHYIDELLIPDSAK.+3	804.1	55.97	sp|Q15582|BGH3_HUMAN	11454.1	1316.81	42593.6	3048.03	7949.55	36187.4	5191.25	14512.8	4622.69	1238.57	1544.9	25050.3	12154.7	34500.3	4514.51	4429.86	0	3658.45	9581.83	2456.7	5004.55	10799.7	4867.55	2297.86
917	sp|Q15582|BGH3_HUMAN.DLLNNHILK.+2	540.314	23.66	sp|Q15582|BGH3_HUMAN	5893.48	5194.93	10499.8	4161.12	5678.83	20708.6	5566.71	41844.3	4818.7	7279.46	1600.14	31745.3	2298.21	35562.6	1577.06	7863.24	15106.5	20268.2	12603	10693.1	19319	20072.1	8071.97	10342.3
918	sp|P20774|MIME_HUMAN.LEGNPIVLGK.+2	520.311	32.58	sp|P20774|MIME_HUMAN	79535.9	46570	37881.7	83545.3	64880.3	348976	147714	526684	234844	92957.3	414750	886902	266408	573940	120420	257032	304465	144634	343622	114137	302376	307776	184101	208659
919	sp|P20774|MIME_HUMAN.LSLLEELSLAENQLLK.+2	907.019	60.31	sp|P20774|MIME_HUMAN	21943	11845.2	11059.2	15176.8	11281.4	104949	32710.9	153348	101184	82466.7	99020.3	285848	198562	204044	50452.5	93714.9	0	42203.6	166644	34153.4	146939	166388	116316	147272
920	sp|P20774|MIME_HUMAN.ETVIIPNEK.+2	521.793	27.21	sp|P20774|MIME_HUMAN	549068	535975	322792	499599	535131	671391	704763	1.07713e+06	188604	79585.2	393413	913332	445314	934132	106846	491081	696943	266387	687297	418996	225687	326813	368986	412086
921	sp|P20774|MIME_HUMAN.LDFTGNLIEDIEDGTFSK.+2	1007.49	59.01	sp|P20774|MIME_HUMAN	19782.2	14197.3	645.458	15346.2	134.958	124111	49276.7	249682	120331	15788	160999	370099	77508.3	165660	31683.4	86779.2	0	35800.6	133454	40410.8	80548.1	131788	84416.1	122465
922	sp|P20774|MIME_HUMAN.ESAYLYAR.+2	486.743	23.41	sp|P20774|MIME_HUMAN	13397.5	2122.34	22701.8	21419	21391.1	307646	179198	418305	195528	218019	418797	319967	380689	338948	95825.2	242131	4795.63	23348.1	396424	78436.9	188238	213362	92669.9	236517
923	sp|P20774|MIME_HUMAN.RLDFTGNLIEDIEDGTFSK.+3	724.027	57.31	sp|P20774|MIME_HUMAN	23778.1	17671.4	11591.4	15018.4	7340.88	79881.6	10476.6	99723.7	77878.9	221874	223231	17845.9	492647	136599	104633	135533	226.096	483.132	286517	379.597	288487	259907	5033.77	14526.2
924	sp|P20774|MIME_HUMAN.EKETVIIPNEK.+3	433.91	23.26	sp|P20774|MIME_HUMAN	225010	187965	128846	163416	156166	275735	148431	309050	75496	74157.5	140593	207581	210213	263776	48123.6	236502	342755	32706.7	273783	73165.8	97035.4	102634	83065.3	144993
925	sp|P20774|MIME_HUMAN.LNNLTFLYLDHNALESVPLNLPESLR.+3	999.201	56.96	sp|P20774|MIME_HUMAN	2859	2775.03	1548.41	490.93	1051.21	131496	2638.7	2340.19	932.279	367.012	63736.3	3833.05	3090.74	3962.36	944.168	5821.63	0	2520.71	20190.6	3388.24	4301.53	8293.83	2623.93	858.703
926	sp|P20774|MIME_HUMAN.LIEDIEDGTFSK.+2	683.841	22.35	sp|P20774|MIME_HUMAN	76463	18317.8	2088.49	24547.8	34406.3	22168.6	1203.46	42422.3	12071.1	9225.28	59825.3	135910	19508.2	19289.3	14826.8	16008.3	14832	83513.5	12841.2	66046.8	31197.2	36888.6	101967	52825
927	sp|P02748|CO9_HUMAN.LSPIYNLVPVK.+2	621.876	46.9	sp|P02748|CO9_HUMAN	17820.8	8878.04	7552.25	15316.4	1009.74	261325	19002.7	162645	114229	72101.4	160703	167123	151235	290845	41927.6	205936	2669.6	82287.1	243625	55286.9	289620	208931	116936	306860
928	sp|P02748|CO9_HUMAN.TEHYEEQIEAFK.+3	508.572	34.54	sp|P02748|CO9_HUMAN	20084	11979.2	6654.56	6464.06	14689.9	134502	17267.5	87749.1	69749.8	529064	89454.6	97233.7	71483.9	158445	22545.9	114656	990.253	42330.9	69139.5	24544.2	173712	128603	64244.7	136900
929	sp|P02748|CO9_HUMAN.DVVLTTTFVDDIK.+2	733.393	49.7	sp|P02748|CO9_HUMAN	42970.4	19226.6	19960.2	29365.2	19119.5	208073	2906.51	142997	156462	536.943	141285	212274	86196.3	289209	27598.8	126026	419.878	64117.2	96849.5	41838	307606	276884	149315	257736
930	sp|P02748|CO9_HUMAN.RPWNVASLIYETK.+3	526.288	44.03	sp|P02748|CO9_HUMAN	77207.4	42550.6	5497.05	10370	41462.9	436732	18102.3	206895	127078	119014	232640	200596	280349	555787	75320.8	340215	9329.59	43391.7	349263	48701.7	489470	377922	100436	422864
931	sp|P02748|CO9_HUMAN.AIEDYINEFSVR.+2	728.359	43.96	sp|P02748|CO9_HUMAN	8898.97	22419.8	11390.7	4908.02	1321.03	358185	42248.8	225280	129021	107849	186855	145722	235101	381765	44692	266529	8271.67	45662.2	321451	40989	367954	299462	70386.8	332608
932	sp|P02748|CO9_HUMAN.ISEGLPALEFPNE.+2	708.356	59.6	sp|P02748|CO9_HUMAN	1071.28	2561.97	6154.48	18308.6	17229.1	107812	1655.75	80626	73296.2	21023.4	69551.2	87415.4	67757.3	126330	4683.26	69723.2	180.85	46393.7	104233	39681.1	123411	103101	61148.8	117973
933	sp|P02748|CO9_HUMAN.SIEVFGQFNGK.+2	613.314	47.05	sp|P02748|CO9_HUMAN	10693.2	16452.2	20168.5	24729.5	12396.9	371859	24221.5	211495	71451	42974.1	65787.1	199972	90519.1	245640	18949.4	143579	416907	65541.2	192846	67680.7	125944	145399	57221.8	189747
934	sp|P02748|CO9_HUMAN.TSNFNAAISLK.+2	583.314	43.38	sp|P02748|CO9_HUMAN	1277.19	2288.82	3060.7	488.692	863.216	99106.1	4561.64	77280.2	59599	8752.03	71192.2	88167.4	63490.1	132003	10354.5	82337.9	141669	27926.9	56779.4	20005.6	165435	127070	48678.5	117849
935	sp|P02748|CO9_HUMAN.FEGIAC[CAM]EISK.+2	577.282	32.75	sp|P02748|CO9_HUMAN	34019.4	7551.04	9515.01	6113.8	8167.94	183127	19766.9	66005.3	63436.2	56038.7	36175.4	38302.8	44392.5	57987.6	7372.51	85229.5	211345	5054.47	67943	10033.7	75833.7	110793	25187.7	22566.7
936	sp|P02748|CO9_HUMAN.AEQC[CAM]C[CAM]EETASSISLHGK.+3	636.28	22.7	sp|P02748|CO9_HUMAN	8352.07	4659.62	2696.59	1186.17	3231.79	38687	5273.46	29847.7	19038.1	6001.88	30471.7	31234.6	38941.6	89010.1	3233.27	52016.1	73684.7	6488.53	27159.6	3603.36	71605.4	32459.9	8761.41	77428.9
937	sp|Q16270|IBP7_HUMAN.ITVVDALHEIPVK.+3	478.617	46.22	sp|Q16270|IBP7_HUMAN	685992	849269	921053	932718	860092	477919	114293	913881	653979	117672	917578	2.05396e+06	988235	1.06589e+06	339287	566503	240.545	890750	864392	880222	376424	522263	1.14016e+06	875594
938	sp|Q16270|IBP7_HUMAN.TELLPGDR.+2	450.743	25.5	sp|Q16270|IBP7_HUMAN	1.30286e+06	1.30249e+06	1.50215e+06	1.59932e+06	1.46456e+06	653163	313209	1.53031e+06	1.03102e+06	43671.3	1.10399e+06	2.48231e+06	653521	974608	354847	672366	880136	1.00565e+06	718134	959739	359694	467129	1.1684e+06	755344
939	sp|Q16270|IBP7_HUMAN.DNLAIQTR.+2	465.754	22.25	sp|Q16270|IBP7_HUMAN	294281	716621	668884	823908	671712	279318	196790	947421	652208	39623.9	756825	1.34491e+06	552311	604999	295783	568347	717440	670723	544772	603276	265941	318409	833238	720929
940	sp|Q16270|IBP7_HUMAN.AGAAAGGPGVSGVC[CAM]VC[CAM]K.+2	759.364	25.43	sp|Q16270|IBP7_HUMAN	154023	192747	205778	248862	196155	90043.4	80808	237518	175284	7504.77	83212.9	729023	50539.7	101114	21408.2	58877.4	171056	237807	62701.8	247893	20914.1	41469.3	42193.5	144782
941	sp|Q16270|IBP7_HUMAN.GYC[CAM]APGMEC[CAM]VK.+2	636.264	26.83	sp|Q16270|IBP7_HUMAN	67055.2	58334.1	67913.2	65978.4	42031.2	53464.5	26188.6	60853.4	40713.2	8005.7	102805	127893	35531.1	15332	3196.86	7021.74	89009	48365.7	26865.4	49296.7	30029.3	21924.8	40996.6	30773.4
942	sp|Q16270|IBP7_HUMAN.TELLPGDRDNLAIQTR.+3	604.659	35	sp|Q16270|IBP7_HUMAN	7615.95	21970.8	26967.9	4346.02	2813.16	169485	174743	140280	41280.5	219461	13224.9	5549.05	562050	50939.3	4286.7	151847	354158	4027.93	226302	3122.15	64937.8	44007.8	12693.8	3765.15
943	sp|Q16270|IBP7_HUMAN.GTC[CAM]EQGPSIVTPPK.+2	735.866	27.18	sp|Q16270|IBP7_HUMAN	105233	126437	125012	148446	108905	213930	28597.4	252634	176025	20075.2	138180	229332	116423	83819	27309.1	114418	253477	66089.6	65031	62491.1	60711.7	99274.7	59667.6	79832.8
944	sp|Q16270|IBP7_HUMAN.HEVTGWVLVSPLSK.+3	517.956	44.18	sp|Q16270|IBP7_HUMAN	192461	107944	211096	80301.2	68907.9	374617	171034	492027	115206	232250	168399	119463	505682	53135.2	693.206	116835	16703.7	7904.01	404897	107751	46390.5	97900.2	23177.5	125236
945	sp|Q16270|IBP7_HUMAN.SRYPVC[CAM]GSDGTTYPSGC[CAM]QLR.+3	754.341	15.35	sp|Q16270|IBP7_HUMAN	1498.2	2288.29	7079.52	9849.93	7997.92	10048.8	23954.7	11350.2	4410.57	78377.6	9986.33	12378	115998	20015.8	8683.61	24487.8	48719.2	8084	37702	2742.16	18582.8	26012.1	4148.96	8409.12
946	sp|Q16270|IBP7_HUMAN.SSSDTC[CAM]GPC[CAM]EPASC[CAM]PPLPPLGC[CAM]LLGETR.+3	1005.78	44.16	sp|Q16270|IBP7_HUMAN	1835.14	49161.4	44089.3	25787.2	16578.1	136652	121393	225206	98535.6	80603.3	150677	142457	386015	110623	61593.9	161048	1377.73	4970.66	279988	26817.7	102787	139992	11186.5	126813
947	sp|Q9UHG2|PCSK1_HUMAN.GEAAGAVQELAR.+2	586.307	27.09	sp|Q9UHG2|PCSK1_HUMAN	55957.8	98118.9	72774.4	105750	139397	306339	37786.3	379705	131113	21769.8	93675.8	320556	86285.7	128223	7392.71	93778.4	596335	56442.3	125330	68677.9	31979.6	90406.8	9742.97	6271.59
948	sp|Q9UHG2|PCSK1_HUMAN.LDPAALAAQLVPAPVPAAALR.+3	675.733	58.12	sp|Q9UHG2|PCSK1_HUMAN	23616.4	70453.7	37950.1	49172.3	48580.2	394166	26631	481471	142579	5476.08	136406	262826	122651	180778	6807.36	125800	206.012	11808.8	210511	46589.6	58839.5	145072	741.001	23811.3
949	sp|Q9UHG2|PCSK1_HUMAN.NSDPALGLDDDPDAPAAQLAR.+2	1061.51	40.7	sp|Q9UHG2|PCSK1_HUMAN	14964.6	23092.4	15616.1	28569.1	34247.9	87370.2	11162.8	99481.2	37276.9	10062.9	36272.7	88226.6	35170.5	40964.7	2529.21	19189.6	132842	10629.1	39927.3	18643	10422.5	38340.3	4020.47	5932.29
950	sp|Q9UHG2|PCSK1_HUMAN.PRPPVYDDGPAGPDAEEAGDETPDVDPELLR.+3	1097.18	50.94	sp|Q9UHG2|PCSK1_HUMAN	19817.4	7037.65	7181.15	14100.8	16624.5	28162.4	5063.72	38389.8	9974.84	21518.4	9759.22	32060.6	2739.58	15862.2	1049.64	8177.58	47250	4886.44	10937.3	5195.05	532.973	9544.92	19896.9	19987.4
951	sp|Q9UHG2|PCSK1_HUMAN.ALAHLLEAER.+2	561.817	28.83	sp|Q9UHG2|PCSK1_HUMAN	58978.2	32445.4	28539.1	36051.5	44233.2	46382.6	36126.2	55461.2	60373.9	257414	26333.8	31647.1	94699	255561	11027.6	351949	80527.5	30886	9596.53	14456.8	44966	22269.2	46427.4	62801.9
952	sp|Q9UHG2|PCSK1_HUMAN.AADHDVGSELPPEGVLGALLR.+3	706.039	55.19	sp|Q9UHG2|PCSK1_HUMAN	10357.7	166883	54938.7	70340.9	86308.3	132213	24510	101879	15648.9	211.422	51116.7	111567	73864.2	64294.2	16431.5	145742	192.975	3849.98	146705	40402.2	47179.8	50794.2	45750.4	120915
953	sp|Q9UHG2|PCSK1_HUMAN.PALGLDDDPDAPAAQLAR.+2	903.455	50.08	sp|Q9UHG2|PCSK1_HUMAN	6814.09	5580.39	3567.47	4990.1	5778.87	11039.8	6140.13	471.073	12865.1	4729.79	9266.6	5244.23	11894.4	854.303	1051.36	3131.76	26620.6	1879.9	5955.4	1045.05	5031.05	11713.7	993.705	1234.81
954	sp|Q9UHG2|PCSK1_HUMAN.LDPAALAAQLVPAPVPAAAL.+2	935.046	60.5	sp|Q9UHG2|PCSK1_HUMAN	30592.4	14359	17976.9	13482.6	15654.1	5881.09	1217.16	8664.09	7092.58	3334.65	1243.89	27872.1	1340.15	14920.4	1713.48	14083.4	0	1083.68	3510.87	554.014	181.451	8117.42	13107.8	216.301
955	sp|Q9UHG2|PCSK1_HUMAN.GEAAGAVQELA.+2	508.256	31.52	sp|Q9UHG2|PCSK1_HUMAN	54277.4	25146.9	22281.6	24921.6	41159.7	15641.9	2186.75	28046.5	18443.6	12683	22274.3	25827.8	9642.66	2533.88	8253.54	1425.22	23943	3494.21	751.291	7445.65	18132.9	5264.34	3857.3	7048.45
956	sp|Q92520|FAM3C_HUMAN.LIADLGSTSITNLGFR.+2	839.462	51.61	sp|Q92520|FAM3C_HUMAN	45916.5	202323	89690.6	125653	119634	346718	129425	399011	163752	167946	486900	1.12661e+06	461990	752970	89546.7	219617	3143.16	124715	505562	166289	163203	383754	198146	506430
957	sp|Q92520|FAM3C_HUMAN.SPFEQHIK.+2	493.259	18.83	sp|Q92520|FAM3C_HUMAN	89309.6	108433	67450.8	85870.3	88764.6	56493.3	34039.7	37380.4	17960.8	21011.3	60405.6	65825.8	28391.9	76764.5	16450.9	29794.4	77247.1	7114.12	42503.2	480.787	19926.1	49036.5	40926	63889.3
958	sp|Q92520|FAM3C_HUMAN.GINVALANGK.+2	478.78	27.19	sp|Q92520|FAM3C_HUMAN	126329	78281	82896.5	98201.9	130588	359457	343119	409965	82605.6	8110.98	603.546	728912	147183	260704	15185.9	130529	518221	122452	282858	183458	8500.26	113697	85149	227560
959	sp|Q92520|FAM3C_HUMAN.MASGAANVVGPK.+2	551.29	20.74	sp|Q92520|FAM3C_HUMAN	327076	308524	198029	311269	181406	69749.3	51759.5	53375.8	53124.4	26009.4	99028.1	272634	41401.7	101557	6557.17	23115.2	187847	20118.9	69560.5	24679	18431.4	29878.7	44851.1	59011.4
960	sp|Q92520|FAM3C_HUMAN.MGTYDDGATK.+2	529.727	14.96	sp|Q92520|FAM3C_HUMAN	12186.6	12376	10434.5	18612.8	19058.7	10899.1	26536.1	6799.84	6960.68	7387.16	3505.96	19706.1	4500.3	5589.36	477.932	7247.68	1409.28	9530.69	9278.88	9436.84	4425.18	9994.18	11645.8	3137.9
961	sp|Q92520|FAM3C_HUMAN.IC[CAM]LEDNVLMSGVK.+2	739.373	44.32	sp|Q92520|FAM3C_HUMAN	148466	272976	186044	249344	128599	139453	8821.19	84420.7	114570	17833.8	319972	386987	14709.1	132230	6905.66	28630.5	170861	81919.1	55427.8	103315	58937.2	85021.2	404.398	70295.7
962	sp|Q92520|FAM3C_HUMAN.YFDMWGGDVAPFIEFLK.+2	1017.99	60.77	sp|Q92520|FAM3C_HUMAN	8199.78	8891.88	4955.75	1509.08	272.566	20806.1	3943.88	16016.1	6040.28	4730.87	9832.92	67778	17492.4	46529.9	2414.76	3889.23	0	129.907	8095.45	551.651	3998.26	10235.7	16447.3	13447.8
963	sp|Q92520|FAM3C_HUMAN.AIQDGTIVLMGTYDDGATK.+2	984.983	44.13	sp|Q92520|FAM3C_HUMAN	173518	197572	111362	175264	131857	90319.9	38609.7	81711.3	72999.7	23550.6	181131	449171	82152.6	203236	6479.44	26751.3	100307	49240.6	94392.6	72087.3	43802.5	74880.6	67261.2	74522.4
964	sp|Q92520|FAM3C_HUMAN.RLIADLGSTSITNLGFR.+3	612.011	45.49	sp|Q92520|FAM3C_HUMAN	11490.9	3808.82	2724.74	20837.8	12169.4	3604.11	1747.72	4099.7	9629.87	24172	1594.14	25449.4	49584.3	5541.72	5148.32	8237.71	80537.7	5074.1	3209.71	4750.84	3279.16	11280.7	14891.9	13469.2
965	sp|P36222|CH3L1_HUMAN.LVMGIPTFGR.+2	545.808	46.75	sp|P36222|CH3L1_HUMAN	46162.8	64661.6	163885	87916.5	71007.7	124771	41922.2	74418.6	26614.7	60573.7	64174.6	338406	159239	319312	16534.4	52695.3	17347.6	88712.2	150979	119554	148815	10888.4	100179	96470.6
966	sp|P36222|CH3L1_HUMAN.VTIDSSYDIAK.+2	606.311	31.46	sp|P36222|CH3L1_HUMAN	172028	95900.1	212561	108166	112996	131885	12003.3	170634	34438.6	67670.3	25599.2	353882	219477	328846	23091.1	127802	22533.5	70314.7	46604.9	86242.2	171323	44088.9	96825.9	129681
967	sp|P36222|CH3L1_HUMAN.SFTLASSETGVGAPISGPGIPGR.+2	1079.56	44.98	sp|P36222|CH3L1_HUMAN	13927.5	12785.3	30399	9521.51	15713.3	23593.8	19617.7	22368	3400.86	18871.2	4855.95	60079.7	42008	53255.8	804.437	13316.1	22033.9	7924.71	28200.5	15574.2	25555.9	4093.34	12877.7	20102.7
968	sp|P36222|CH3L1_HUMAN.GNQWVGYDDQESVK.+2	812.865	29.96	sp|P36222|CH3L1_HUMAN	89223.8	52928.5	102275	56961.8	65510.9	68234.7	57948.4	89975.7	13825	34113.3	13905.9	149263	80809.4	128025	16660.6	39159.5	56890.3	33421.4	56440.2	42232.4	51778.4	2718.07	45665.6	54643.3
969	sp|P36222|CH3L1_HUMAN.ILGQQVPYATK.+2	609.348	26.67	sp|P36222|CH3L1_HUMAN	7300.27	6178.43	9541.75	1307.74	19458.4	42259.5	92437.7	32222.2	3161.93	55336.9	6644.92	24823.8	134897	37673	10497.3	36649.9	76216.3	8012.83	74756.8	33247.1	43208	11097.1	12701.9	6359.87
970	sp|P36222|CH3L1_HUMAN.THGFDGLDLAWLYPGR.+3	606.637	55.72	sp|P36222|CH3L1_HUMAN	37269.1	40885	77681.1	34308.1	41364.9	113289	64023.5	125437	44154.3	80816.6	24612.3	248864	194031	275285	35942.2	86118.4	679.401	51942.7	153659	60650.5	115518	24356.8	71387.8	104213
971	sp|P36222|CH3L1_HUMAN.GTTGHHSPLFR.+3	403.876	18.87	sp|P36222|CH3L1_HUMAN	1975.87	2117.76	8918.29	370.9	2290.38	13542.6	3324.45	45573.6	6081.95	11912.5	5465.24	20171	44495.2	101227	5202.07	35929.1	39929.3	21724.6	7400.88	7358.01	27512.6	25721.5	3993.51	3609.31
972	sp|P36222|CH3L1_HUMAN.TLLSVGGWNFGSQR.+2	761.394	49.03	sp|P36222|CH3L1_HUMAN	31361.2	28242.4	56236.3	35349.9	34705.9	102948	57588.6	99060.7	23118.6	96906	22230.9	1186.32	175583	6850.32	6026.3	36462.2	6002.84	8809.31	195321	6226.69	46707	2894.85	34078	53528.7
973	sp|P36222|CH3L1_HUMAN.EAGTLAYYEIC[CAM]DFLR.+2	910.93	61.56	sp|P36222|CH3L1_HUMAN	2557.47	631.356	3725.08	5219	6082.91	23530.9	13114.7	5642.33	520.772	2301.57	4742.6	5101.24	4687.58	18554.1	3169.3	9402.86	135.613	1097.97	3564.58	6555.26	21146.5	19900.9	5224.36	8737.34
974	sp|P08253|MMP2_HUMAN.IDAVYEAPQEEK.+2	696.338	26.39	sp|P08253|MMP2_HUMAN	42971	39746.6	30736.3	37021	37928.1	61251.7	15326.1	87912	70478.3	33800.9	71247.9	118438	58468.4	98363.3	30281.4	45278.5	65207.7	30461.3	60504.1	34339.6	66077.7	80590.8	49671.6	42375.5
975	sp|P08253|MMP2_HUMAN.GEIFFFK.+2	444.237	45.95	sp|P08253|MMP2_HUMAN	22946.7	32255.1	29835.4	32083.5	33342.4	85438.8	6942.4	103713	90363.5	33553	136452	244244	122165	237844	40620.9	70165.3	7588.63	61096	130420	72886.3	129971	148621	84112.5	85123.7
976	sp|P08253|MMP2_HUMAN.AFQVWSDVTPLR.+2	709.875	43.46	sp|P08253|MMP2_HUMAN	1919.67	15357	14396.4	4879.25	1938.56	109506	68917.1	152788	74364.2	56772.4	156615	210700	162063	213636	62112.4	85577.4	20386.3	59645.9	189994	67354.6	118934	115150	44804.5	116391
977	sp|P08253|MMP2_HUMAN.IIGYTPDLDPETVDDAFAR.+2	1054.51	54.77	sp|P08253|MMP2_HUMAN	8241.08	26215.9	11289.2	4000.76	22510.8	57688.1	28703.1	118048	87441.9	34909.3	101258	130468	91259.4	147547	29034.8	54387.2	192.281	31117.9	3724.43	44929.3	106492	87821.9	56550.4	62239
978	sp|P08253|MMP2_HUMAN.VDAAFNWSK.+2	519.256	27.95	sp|P08253|MMP2_HUMAN	7557.02	21765.4	2248.81	924965	525960	129155	23836.5	143480	851897	9202.11	75820.2	296227	18381.5	238735	42589	2.45578e+06	119704	116105	89213	52526.9	106973	89389.9	1.17819e+06	38100.3
979	sp|P08253|MMP2_HUMAN.DKPMGPLLVATFWPELPEK.+3	723.387	57.88	sp|P08253|MMP2_HUMAN	26451.7	19727	20760.3	383.333	16266.6	45520.1	12622.2	68912.3	24607.6	4118.23	30679.1	81152.7	78151.8	28456.9	30336.3	16184.1	221.576	1485.67	14329.6	19417.4	7351.98	43824.6	13213.2	137563
980	sp|P08253|MMP2_HUMAN.ELAVQYLNTFYGC[CAM]PK.+2	901.943	49.1	sp|P08253|MMP2_HUMAN	10423.7	9063.75	9734.36	9330.8	1277.18	30983.2	5379.19	49592.3	29640	7268.28	28406.7	37072.6	29917.1	39080.2	9281.48	16745.3	2440.28	2490.36	47003.4	4061.72	4480.12	21166.8	7002.85	20343.2
981	sp|P08253|MMP2_HUMAN.IHDGEADIMINFGR.+3	529.924	40.01	sp|P08253|MMP2_HUMAN	8815.88	21840.5	15766.4	21212.4	20718.2	36804.9	26620.9	31992.7	12847.7	49020.7	43887.7	79171.1	24487.2	57449.5	13316.7	4311.33	38687.7	33595.8	42749	21516.1	45730	30405.3	35853.7	20185.1
982	sp|P08253|MMP2_HUMAN.PLTSLGLPPDVQR.+2	696.896	50.34	sp|P08253|MMP2_HUMAN	59449.2	18961.5	298.449	2125.9	934.941	2138.07	8567.88	52681.6	41209.3	8554.4	50571.1	27904.4	16887	4755.84	7348.05	948.105	8091.3	7895.45	26966.3	1409.94	102544	35493.2	6705.69	51687.3
983	tr|G3XAM2|G3XAM2_HUMAN.AQLGDLPWQVAIK.+2	719.906	50.54	tr|G3XAM2|G3XAM2_HUMAN	147733	112140	163026	182239	77078	328467	22111.4	444155	202340	220738	196527	400544	305283	543398	80387.8	242127	267.416	135783	303248	210006	283150	375697	310637	307477
984	tr|G3XAM2|G3XAM2_HUMAN.VFSLQWGEVK.+2	596.822	45.15	tr|G3XAM2|G3XAM2_HUMAN	142026	130253	154299	184169	76922.4	328990	28382.8	427290	212890	185451	211880	395322	498666	523704	83974.5	238863	2602.68	94536.4	412273	167821	268748	561249	289498	295800
985	tr|G3XAM2|G3XAM2_HUMAN.VTYTSQEDLVEK.+2	706.351	27.01	tr|G3XAM2|G3XAM2_HUMAN	46898.8	35081.4	37725.4	43629.5	30661.9	92692.4	15888.7	139433	49402.3	7530.08	30402.3	114112	45459.8	112516	9092.56	45224.7	114089	31950.1	50843.1	56816.7	25540.9	73854.4	59427.5	61081.5
[truncated: 1,539 more rows]

## Sheet: SWAT Proteins
Row	Peak Name	Group	LCR_MP_SWATH_n1	LCR_MP_SWATH_n2	LCR_MP_SWATH_n3	LCR_MP_SWATH_n4	LCR_MP_SWATH_n5	LCR_RL_3	LCR_RL_5	LCR_RL_8	LCR_RL_12	LCR_RL_16	LCR_RL_19	LCR_RL_23	LCR_RL_24	LCR_RL_26	LCR_RL_34	LCR_RL_36	LCR_RL_37	LCR_RL_42	LCR_RL_43	LCR_RL_46	LCR_RL_53	LCR_RL_57	LCR_RL_65	LCR_RL_71
[truncated: 564 more rows]

[truncated: 5 more sheets: By fold change, By P, P<E-04, Gene names +, Gene names -]
