# Supplementary material for: Cerebrospinal Fluid Proteomics in Friedreich Ataxia Reveals Markers of Neurodegeneration and Neuroinflammation
Source: Front Neurosci. 2022 Jul 13;16:885313. doi: 10.3389/fnins.2022.885313 (PMC9326443; doi:10.3389/fnins.2022.885313)
Supplement: Supplementary file 2 [file Table_2.XLSX]

## Sheet: Feuil1
N	Unused	Total	% Cov	Accession #	Name	Species	Peptides(95%)
1	706.44	706.44	96.3	sp|P01024|CO3_HUMAN	Complement C3 OS=Homo sapiens OX=9606 GN=C3 PE=1 SV=2	HUMAN	1222
6	329.19	329.19	86.4	sp|P02766|TTHY_HUMAN	Transthyretin OS=Homo sapiens OX=9606 GN=TTR PE=1 SV=1	HUMAN	1030
34	115.16	115.16	86.3	sp|P01034|CYTC_HUMAN	Cystatin-C OS=Homo sapiens OX=9606 GN=CST3 PE=1 SV=1	HUMAN	385
44	93.35	93.35	94.3	sp|O15240|VGF_HUMAN	Neurosecretory protein VGF OS=Homo sapiens OX=9606 GN=VGF PE=1 SV=2	HUMAN	103
45	92.74	92.74	84.5	sp|P10645|CMGA_HUMAN	Chromogranin-A OS=Homo sapiens OX=9606 GN=CHGA PE=1 SV=7	HUMAN	182
67	64.37	64.37	87.7	sp|P08571|CD14_HUMAN	Monocyte differentiation antigen CD14 OS=Homo sapiens OX=9606 GN=CD14 PE=1 SV=2	HUMAN	81
74	59.99	59.99	74.8	tr|A0A087WTA8|A0A087WTA8_HUMAN	Collagen alpha-2(I) chain OS=Homo sapiens OX=9606 GN=COL1A2 PE=1 SV=1	HUMAN	53
80	58.63	58.63	79	sp|P61769|B2MG_HUMAN	Beta-2-microglobulin OS=Homo sapiens OX=9606 GN=B2M PE=1 SV=1	HUMAN	138
101	41.85	41.85	88.7	sp|P14618-2|KPYM_HUMAN	Isoform M1 of Pyruvate kinase PKM OS=Homo sapiens OX=9606 GN=PKM	HUMAN	34
105	40.83	40.83	76	sp|Q15582|BGH3_HUMAN	Transforming growth factor-beta-induced protein ig-h3 OS=Homo sapiens OX=9606 GN=TGFBI PE=1 SV=1	HUMAN	43
125	35.34	99.48	84.1	sp|P23142|FBLN1_HUMAN	Fibulin-1 OS=Homo sapiens OX=9606 GN=FBLN1 PE=1 SV=4	HUMAN	149
177	24.16	24.16	87.6	tr|C9J650|C9J650_HUMAN	Neuroendocrine protein 7B2 OS=Homo sapiens OX=9606 GN=SCG5 PE=1 SV=1	HUMAN	21
180	24.02	24.03	75.5	tr|A0A096LP69|A0A096LP69_HUMAN	CD99 antigen OS=Homo sapiens OX=9606 GN=CD99 PE=1 SV=1	HUMAN	23
182	23.49	23.49	90.4	sp|P30086|PEBP1_HUMAN	Phosphatidylethanolamine-binding protein 1 OS=Homo sapiens OX=9606 GN=PEBP1 PE=1 SV=3	HUMAN	21
193	22.35	22.35	51.8	sp|P07477|TRY1_HUMAN	Trypsin-1 OS=Homo sapiens OX=9606 GN=PRSS1 PE=1 SV=1	HUMAN	157
204	21.3	21.3	71.5	sp|P01210|PENK_HUMAN	Proenkephalin-A OS=Homo sapiens OX=9606 GN=PENK PE=1 SV=1	HUMAN	20
249	15.79	15.79	42.3	sp|P42785|PCP_HUMAN	Lysosomal Pro-X carboxypeptidase OS=Homo sapiens OX=9606 GN=PRCP PE=1 SV=1	HUMAN	11
255	15.15	15.15	44	tr|A0A087X1J7|A0A087X1J7_HUMAN	Glutathione peroxidase OS=Homo sapiens OX=9606 GN=GPX3 PE=1 SV=1	HUMAN	22
265	14.6	14.6	67.3	sp|O14498|ISLR_HUMAN	Immunoglobulin superfamily containing leucine-rich repeat protein OS=Homo sapiens OX=9606 GN=ISLR PE=2 SV=1	HUMAN	13
301	11.44	11.44	98.7	sp|P62979|RS27A_HUMAN	Ubiquitin-40S ribosomal protein S27a OS=Homo sapiens OX=9606 GN=RPS27A PE=1 SV=2	HUMAN	22
323	10.39	10.39	97.7	sp|P41271-2|NBL1_HUMAN	Isoform 2 of Neuroblastoma suppressor of tumorigenicity 1 OS=Homo sapiens OX=9606 GN=NBL1	HUMAN	11
342	9.88	9.88	51.1	sp|P09603|CSF1_HUMAN	Macrophage colony-stimulating factor 1 OS=Homo sapiens OX=9606 GN=CSF1 PE=1 SV=2	HUMAN	8
367	8.41	8.67	51.5	sp|P48740-4|MASP1_HUMAN	Isoform 4 of Mannan-binding lectin serine protease 1 OS=Homo sapiens OX=9606 GN=MASP1	HUMAN	8
379	8	119.09	94	tr|J3KRP0|J3KRP0_HUMAN	Beta-Ala-His dipeptidase OS=Homo sapiens OX=9606 GN=CNDP1 PE=1 SV=2	HUMAN	265
413	6.81	6.81	52.4	sp|Q9Y2T3|GUAD_HUMAN	Guanine deaminase OS=Homo sapiens OX=9606 GN=GDA PE=1 SV=1	HUMAN	6
430	6.24	6.24	84	sp|P07998|RNAS1_HUMAN	Ribonuclease pancreatic OS=Homo sapiens OX=9606 GN=RNASE1 PE=1 SV=4	HUMAN	36
520	4	4	39	tr|H0YDE5|H0YDE5_HUMAN	UPF0606 protein KIAA1549L (Fragment) OS=Homo sapiens OX=9606 GN=KIAA1549L PE=1 SV=1	HUMAN	4
546	3.57	3.57	51	sp|O95158|NXPH4_HUMAN	Neurexophilin-4 OS=Homo sapiens OX=9606 GN=NXPH4 PE=2 SV=3	HUMAN	3
569	2.71	2.71	36.7	sp|Q9UPU3|SORC3_HUMAN	VPS10 domain-containing receptor SorCS3 OS=Homo sapiens OX=9606 GN=SORCS3 PE=1 SV=2	HUMAN	3
572	2.61	2.61	59.6	sp|Q6ZSJ9|SHSA6_HUMAN	Protein shisa-6 OS=Homo sapiens OX=9606 GN=SHISA6 PE=2 SV=2	HUMAN	2
642	2	205.38	93.5	tr|A0A0A0MS51|A0A0A0MS51_HUMAN	Gelsolin OS=Homo sapiens OX=9606 GN=GSN PE=1 SV=1	HUMAN	441
689	2	2	48.9	tr|E7EQR8|E7EQR8_HUMAN	Protein YIPF3 OS=Homo sapiens OX=9606 GN=YIPF3 PE=1 SV=1	HUMAN	3
715	2	2	33.2	sp|Q8TBP5|F174A_HUMAN	Membrane protein FAM174A OS=Homo sapiens OX=9606 GN=FAM174A PE=2 SV=1	HUMAN	1
